# Supplementary material for: COVseq is a cost-effective workflow for mass-scaleSARS-CoV-2 genomic surveillance
Source: Research Square preprint supplement (doi:10.21203/rs.3.rs-147464/v1), 2021-01-19
Supplement: Supplementary file 1 [file 0ac63300efcf9beb5056ac6d.xlsx]

## Sheet: COVseq workflow #1
Supplementary Table 5. List of reagents and relative costs for sequencing SARS-CoV-2 samples using COVseq vs. three commercially available library preparation kits.
Reagent	Brand (cat. no.)	Price (USD)	Amount	Vol. per sample/library	No. samples/libraries
1. RT and multiplexed PCR (cost per sample)
SuperScript IV	Thermo (18090050)	310	50 μl	1 μl	50
RNase OUT	Thermo (10777-019)	253	125 μl	1 μl	125
Random hexamers (50μM)	Thermo (N80800127)	67	100 μl	1 μl	100
dNTPs (10mM)	Thermo (R0191)	21	200 μl	1 μl	200
NEBNext Q5 Hot Start HiFi PCR Master Mix	NEB (M0543L)	540	1.25 ml	90 μl	14
Primer pools (pool 1,2,3,4,5 and 6)	IDT (custom @ 50 μM)	564	1200 μl *6	1.8 μl (@10 μM) *6	3333
AMPure XP beads	Beckman (A63881)	1240	60 ml	120 μl	500
2. Digestion and ligation (cost per sample)
Mineral oil	Sigma (M5904)	81	500 ml	5 μl	100000
MseI	NEB (R0525L)	413	250 μl	50 nl	5000
NlaIII	NEB (R0125L)	414	250 μl	50 nl	5000
MseI adapter (each F+R oligo)	IDT (custom @100 μM)	17.2	400 μl	150 nl (@33 nM)	8000000
NlaIII adapter (each F+R oligo)	IDT (custom @100 μM)	17.2	400 μl	150 nl (@33 nM)	8000000
T4 DNA Ligase	Thermo (EL0011)	60	200 μl	150 nl	1300
ATP (100mM)	Thermo (R0441)	27	250 μl	120 nl	21000
BSA (50mg/ml)	Thermo (AM2616)	148	1 ml	30 nl	33300
3. Library preparation (cost per library)
AMPure XP beads	Beckman (A63881)	1240	60 ml	3.08 ml	19
MEGAscript	Thermo (AM1334)	466	80 μl	1.5 μl	53
RNase OUT	Thermo (10777-019)	253	125 μl	2.5 μl	50
DNase I	Thermo (AM2222)	249	1 ml	1 μl	1000
RNAClean XP beads	Beckman (A63987)	800	40 ml	54 μl	740
RA3 adapter	IDT (custom @ 100 μM)	968	240 μl	1 μl (@ 10 μM)	2400
T4 RNA ligase 2, truncated	NEB (M0242L)	414	50 μl	1 μl	50
dNTP (25mM)	Thermo (R1121)	169	1 ml	1 μl (@ 12.5 mM)	2000
RT primer (RTP)	IDT (custom @ 100 μM)	94	410 μl	2 μl (@ 10 μM)	2000
SuperScript IV	Thermo (18090050)	310	50 μl	2 μl	25
RP1 primer	IDT (custom @ 100 μM)	80	330 μl	4 μl (@ 10 μM)	825
RPI primer (each index)	IDT (custom @ 100 μM)	139	959 μl	4 μl (@ 10 μM)	2400
NEBNext Ultra II Q5 PCR Master Mix	NEB (M0544S)	148	1.25 ml	50 μl	25
4. Sequencing (cost per sample)
NextSeq 500/550 High Output Kit v2.5 (150cycles)	Illumina (20024907)	3822	400 M	0.4 M	1000

## Sheet: COVseq workflow #2
Supplementary Table 5. List of reagents and relative costs for sequencing SARS-CoV-2 samples using COVseq vs. three commercially available library preparation kits.
Reagent	Brand (cat. no.)	Price (USD)	Amount	Vol. per sample/library	No. samples/libraries
1. RT and multiplexed PCR (cost per sample)
SuperScript IV	Thermo (18090050)	310	50 μl	1 μl	50
RNase OUT	Thermo (10777-019)	253	125 μl	1 μl	125
Random hexamers (50μM)	Thermo (N80800127)	67	100 μl	1 μl	100
dNTPs (10mM)	Thermo (R0191)	21	200 μl	1 μl	200
NEBNext Q5 Hot Start HiFi PCR Master Mix	NEB (M0543L)	540	1.25 ml	90 μl	14
Primer pools (pool 1,2,3,4,5 and 6)	IDT (custom @ 50 μM)	564	1200 μl *6	1.8 μl (@10 μM) *6	3333
2. Digestion and ligation (cost per sample)
Mineral oil	Sigma (M5904)	81	500 ml	5 μl	100000
MseI	NEB (R0525L)	413	250 μl	50 nl	5000
NlaIII	NEB (R0125L)	414	250 μl	50 nl	5000
MseI adapter (each F+R oligo)	IDT (custom @100 μM)	17.2	400 μl	150 nl (@33 nM)	8000000
NlaIII adapter (each F+R oligo)	IDT (custom @100 μM)	17.2	400 μl	150 nl (@33 nM)	8000000
T4 DNA Ligase	Thermo (EL0011)	60	200 μl	150 nl	1300
ATP (100mM)	Thermo (R0441)	27	250 μl	120 nl	21000
BSA (50mg/ml)	Thermo (AM2616)	148	1 ml	30 nl	33300
3. Library preparation (cost per library)
AMPure XP beads	Beckman (A63881)	1240	60 ml	3.08 ml	19
MEGAscript	Thermo (AM1334)	466	80 μl	1.5 μl	53
RNase OUT	Thermo (10777-019)	253	125 μl	2.5 μl	50
DNase I	Thermo (AM2222)	249	1 ml	1 μl	1000
RNAClean XP beads	Beckman (A63987)	800	40 ml	54 μl	740
RA3 adapter	IDT (custom @ 100 μM)	968	240 μl	1 μl (@ 10 μM)	2400
T4 RNA ligase 2, truncated	NEB (M0242L)	414	50 μl	1 μl	50
dNTP (25mM)	Thermo (R1121)	169	1 ml	1 μl (@ 12.5 mM)	2000
RT primer (RTP)	IDT (custom @ 100 μM)	94	410 μl	2 μl (@ 10 μM)	2000
SuperScript IV	Thermo (18090050)	310	50 μl	2 μl	25
RP1 primer	IDT (custom @ 100 μM)	80	330 μl	4 μl (@ 10 μM)	825
RPI primer (each index)	IDT (custom @ 100 μM)	139	959 μl	4 μl (@ 10 μM)	2400
NEBNext Ultra II Q5 PCR Master Mix	NEB (M0544S)	148	1.25 ml	50 μl	25
4. Sequencing (cost per sample)
NextSeq 500/550 High Output Kit v2.5 (150cycles)	Illumina (20024907)	3822	400 M	0.4 M	1000

## Sheet: COVseq workflow #3
Supplementary Table 5. List of reagents and relative costs for sequencing SARS-CoV-2 samples using COVseq vs. three commercially available library preparation kits.
Reagent	Brand (cat. no.)	Price (USD)	Amount	Vol. per sample/library	No. samples/libraries
1. RT and multiplexed PCR (cost per sample)
Mineral oil	Sigma (M5904)	81	500 ml	5 μl	16667
SuperScript IV	Thermo (18090050)	310	50 μl	5 nl	1667
RNase OUT	Thermo (10777-019)	253	125 μl	5 nl	4167
Random hexamers (50μM)	Thermo (N80800127)	67	100 μl	5 nl	3333
dNTPs (10mM)	Thermo (R0191)	21	200 μl	5 nl	6667
NEBNext Q5 Hot Start HiFi PCR Master Mix	NEB (M0543L)	540	1.25 ml	175 nl	1192
Primer pools (pool 1,2,3,4,5 and 6)	IDT (custom @ 50 μM)	564	1200 μl *6	21 nl (@10 μM) *6	280000
2. Digestion and ligation (cost per sample)
MseI	NEB (R0525L)	413	250 μl	50 nl	833
NlaIII	NEB (R0125L)	414	250 μl	50 nl	833
MseI adapter (each F+R oligo)	IDT (custom @100 μM)	17.2	400 μl	150 nl (@33 nM)	8000000
NlaIII adapter (each F+R oligo)	IDT (custom @100 μM)	17.2	400 μl	150 nl (@33 nM)	8000000
T4 DNA Ligase	Thermo (EL0011)	60	200 μl	150 nl	217
ATP (100mM)	Thermo (R0441)	27	250 μl	120 nl	3500
BSA (50mg/ml)	Thermo (AM2616)	148	1 ml	30 nl	5550
3. Library preparation (cost per library)
AMPure XP beads	Beckman (A63881)	1240	60 ml	3.08 ml	19
MEGAscript	Thermo (AM1334)	466	80 μl	1.5 μl	53
RNase OUT	Thermo (10777-019)	253	125 μl	2.5 μl	50
DNase I	Thermo (AM2222)	249	1 ml	1 μl	1000
RNAClean XP beads	Beckman (A63987)	800	40 ml	54 μl	740
RA3 adapter	IDT (custom @ 100 μM)	968	240 μl	1 μl (@ 10 μM)	2400
T4 RNA ligase 2, truncated	NEB (M0242L)	414	50 μl	1 μl	50
dNTP (25mM)	Thermo (R1121)	169	1 ml	1 μl (@ 12.5 mM)	2000
RT primer (RTP)	IDT (custom @ 100 μM)	94	410 μl	2 μl (@ 10 μM)	2000
SuperScript IV	Thermo (18090050)	310	50 μl	2 μl	25
RP1 primer	IDT (custom @ 100 μM)	80	330 μl	4 μl (@ 10 μM)	825
RPI primer (each index)	IDT (custom @ 100 μM)	139	959 μl	4 μl (@ 10 μM)	2400
NEBNext Ultra II Q5 PCR Master Mix	NEB (M0544S)	148	1.25 ml	50 μl	25
4. Sequencing (cost per sample)
NextSeq 500/550 High Output Kit v2.5 (150cycles)	Illumina (20024907)	3822	400 M	0.4 M	1000

## Sheet: NEBNext
Supplementary Table 5. List of reagents and relative costs for sequencing SARS-CoV-2 samples using COVseq vs. three commercially available library preparation kits.
Reagent	Brand (cat. no.)	Price (USD)	Amount	Vol. per sample/library	No. samples/libraries
1. RT and multiplexed PCR (cost per sample)
SuperScript IV	Thermo (18090050)	310	50 μl	1 μl	50
RNase OUT	Thermo (10777-019)	253	125 μl	1 μl	125
Random hexamers (50μM)	Thermo (N80800127)	67	100 μl	1 μl	100
dNTPs (10mM)	Thermo (R0191)	21	200 μl	1 μl	200
NEBNext Q5 Hot Start HiFi PCR Master Mix	NEB (M0543L)	540	1.25 ml	90 μl	14
Primer pools (pool 1,2,3,4,5 and 6)	IDT (custom @ 50 μM)	564	1200 μl *6	1.8 μl (@10 μM) *6	3333
AMPure XP beads	Beckman (A63881)	1240	60 ml	120 μl	500
2. Library preparation (cost per sample)
NEBNext Ultra II FS DNA Library Prep Kit	NEB (E7805S)	1021	24 rnx	1 rnx	24
NEBNext Multiplex Oligos (96 indexes)	NEB (E6609S)	650	96 rnx	1 rnx	96
AMPure XP beads	Beckman (A63881)	1240	60 ml	132 μl	455
3. Sequencing (cost per sample)
NextSeq 500/550 High Output Kit v2.5 (150cycles)	Illumina (20024907)	3822	400 M	0.4 M	1000

## Sheet: Nextera
Supplementary Table 5. List of reagents and relative costs for sequencing SARS-CoV-2 samples using COVseq vs. three commercially available library preparation kits.
Reagent	Brand (cat. no.)	Price (USD)	Amount	Vol. per sample/library	No. samples/libraries
1. RT and multiplexed PCR (cost per sample)
SuperScript IV	Thermo (18090050)	310	50 μl	1 μl	50
RNase OUT	Thermo (10777-019)	253	125 μl	1 μl	125
Random hexamers (50μM)	Thermo (N80800127)	67	100 μl	1 μl	100
dNTPs (10mM)	Thermo (R0191)	21	200 μl	1 μl	200
NEBNext Q5 Hot Start HiFi PCR Master Mix	NEB (M0543L)	540	1.25 ml	90 μl	14
Primer pools (pool 1,2,3,4,5 and 6)	IDT (custom @ 50 μM)	564	1200 μl *6	1.8 μl (@10 μM) *6	3333
AMPure XP beads	Beckman (A63881)	1240	60 ml	120 μl	500
2. Library preparation (cost per sample)
Nextera XT DNA Library Preparation Kit	Illumina (FC-131-1024)	1092	24 rnx	1 rnx	24
Nextera XT Index Kit v2 Set A (96 indexes)	Illumina (FC-131-2001)	1305	384 rnx	1 rnx	384
Nextera XT Index Kit v2 Set B (96 indexes)	Illumina (FC-131-2002)	1305	384 rnx	1 rnx	384
Nextera XT Index Kit v2 Set C (96 indexes)	Illumina (FC-131-2003)	1305	384 rnx	1 rnx	384
Nextera XT Index Kit v2 Set D (96 indexes)	Illumina (FC-131-2004)	1305	384 rnx	1 rnx	384
AMPure XP beads	Beckman (A63881)	1240	60 ml	90 μl	666
3. Sequencing (cost per sample)
NextSeq 500/550 High Output Kit v2.5 (300cycles)	Illumina (20024908)	6169	400 M	0.4 M	1000

## Sheet: TruSeq
Supplementary Table 5. List of reagents and relative costs for sequencing SARS-CoV-2 samples using COVseq vs. three commercially available library preparation kits.
Reagent	Brand (cat. no.)	Price (USD)	Amount	Vol. per sample/library	No. samples/libraries
1. Library preparation (cost per sample)
SuperScript II	Thermo (18064014)	128	10 μl	1 μl	10
RNACleanXP beads neede in the kit	Beckman (A63987)	800	40 ml	99 μl	404
TruSeq Stranded Total RNA Library Prep kit	Illumina (20020596)	6980	48 rnx	1 rnx	48
TruSeq RNA CD Index Plate (96 Indexes)	Illumina (20019792)	677	96 rnx	1 rnx	96
AMPure XP beads	Beckman (A63881)	1240	60 ml	232 μl	258
2. Sequencing (cost per sample)
NextSeq 500/550 High Output Kit v2.5 (150cycles)	Illumina (20024907)	3822	400 M	0.4 M	1000
