# Supplementary material for: COVseq is a cost-effective workflow for mass-scaleSARS-CoV-2 genomic surveillance
Source: Research Square preprint supplement (doi:10.21203/rs.3.rs-147464/v1), 2021-01-19
Supplement: Supplementary file 3 [file 4efd0587a41cf721617651e0.xlsx]

## Sheet: MseI_For_96-barcodes
Supplementary Table 3. List of oligonucleotides that can be used to prepare COVseq adapters.
	Adapter ID	Sequence (5'->3')
	MseI_96-barcodes_1	TAAGCGTGATGNNNNNNNNGATCGTCGGACTGTAGAACTCTGAACCCCTATAGTGAGTCGTATTACCGGCCTCAATCGAA
	MseI_96-barcodes_2	TAAGCGACGACNNNNNNNNGATCGTCGGACTGTAGAACTCTGAACCCCTATAGTGAGTCGTATTACCGGCCTCAATCGAA
	MseI_96-barcodes_3	TAAGCGGTCGTNNNNNNNNGATCGTCGGACTGTAGAACTCTGAACCCCTATAGTGAGTCGTATTACCGGCCTCAATCGAA
	MseI_96-barcodes_4	TAAGCGCATCANNNNNNNNGATCGTCGGACTGTAGAACTCTGAACCCCTATAGTGAGTCGTATTACCGGCCTCAATCGAA
	MseI_96-barcodes_5	TAAGATTGATGNNNNNNNNGATCGTCGGACTGTAGAACTCTGAACCCCTATAGTGAGTCGTATTACCGGCCTCAATCGAA
	MseI_96-barcodes_6	TAAGATACGACNNNNNNNNGATCGTCGGACTGTAGAACTCTGAACCCCTATAGTGAGTCGTATTACCGGCCTCAATCGAA
	MseI_96-barcodes_7	TAAGATGTCGTNNNNNNNNGATCGTCGGACTGTAGAACTCTGAACCCCTATAGTGAGTCGTATTACCGGCCTCAATCGAA
	MseI_96-barcodes_8	TAAGATCATCANNNNNNNNGATCGTCGGACTGTAGAACTCTGAACCCCTATAGTGAGTCGTATTACCGGCCTCAATCGAA
	MseI_96-barcodes_9	TAAGGATGATGNNNNNNNNGATCGTCGGACTGTAGAACTCTGAACCCCTATAGTGAGTCGTATTACCGGCCTCAATCGAA
	MseI_96-barcodes_10	TAAGGAACGACNNNNNNNNGATCGTCGGACTGTAGAACTCTGAACCCCTATAGTGAGTCGTATTACCGGCCTCAATCGAA
	MseI_96-barcodes_11	TAAGGAGTCGTNNNNNNNNGATCGTCGGACTGTAGAACTCTGAACCCCTATAGTGAGTCGTATTACCGGCCTCAATCGAA
	MseI_96-barcodes_12	TAAGGACATCANNNNNNNNGATCGTCGGACTGTAGAACTCTGAACCCCTATAGTGAGTCGTATTACCGGCCTCAATCGAA
	MseI_96-barcodes_13	TAATTCTGATGNNNNNNNNGATCGTCGGACTGTAGAACTCTGAACCCCTATAGTGAGTCGTATTACCGGCCTCAATCGAA
	MseI_96-barcodes_14	TAATTCACGACNNNNNNNNGATCGTCGGACTGTAGAACTCTGAACCCCTATAGTGAGTCGTATTACCGGCCTCAATCGAA
	MseI_96-barcodes_15	TAATTCGTCGTNNNNNNNNGATCGTCGGACTGTAGAACTCTGAACCCCTATAGTGAGTCGTATTACCGGCCTCAATCGAA
	MseI_96-barcodes_16	TAATTCCATCANNNNNNNNGATCGTCGGACTGTAGAACTCTGAACCCCTATAGTGAGTCGTATTACCGGCCTCAATCGAA
	MseI_96-barcodes_17	TAAGCGTGTGANNNNNNNNGATCGTCGGACTGTAGAACTCTGAACCCCTATAGTGAGTCGTATTACCGGCCTCAATCGAA
	MseI_96-barcodes_18	TAAGCGACACGNNNNNNNNGATCGTCGGACTGTAGAACTCTGAACCCCTATAGTGAGTCGTATTACCGGCCTCAATCGAA
	MseI_96-barcodes_19	TAAGCGGTGTCNNNNNNNNGATCGTCGGACTGTAGAACTCTGAACCCCTATAGTGAGTCGTATTACCGGCCTCAATCGAA
	MseI_96-barcodes_20	TAAGCGCACATNNNNNNNNGATCGTCGGACTGTAGAACTCTGAACCCCTATAGTGAGTCGTATTACCGGCCTCAATCGAA
	MseI_96-barcodes_21	TAATGATGTGANNNNNNNNGATCGTCGGACTGTAGAACTCTGAACCCCTATAGTGAGTCGTATTACCGGCCTCAATCGAA
	MseI_96-barcodes_22	TAATGAACACGNNNNNNNNGATCGTCGGACTGTAGAACTCTGAACCCCTATAGTGAGTCGTATTACCGGCCTCAATCGAA
	MseI_96-barcodes_23	TAATGAGTGTCNNNNNNNNGATCGTCGGACTGTAGAACTCTGAACCCCTATAGTGAGTCGTATTACCGGCCTCAATCGAA
	MseI_96-barcodes_24	TAATGACACATNNNNNNNNGATCGTCGGACTGTAGAACTCTGAACCCCTATAGTGAGTCGTATTACCGGCCTCAATCGAA
	MseI_96-barcodes_25	TAACTCTGTGANNNNNNNNGATCGTCGGACTGTAGAACTCTGAACCCCTATAGTGAGTCGTATTACCGGCCTCAATCGAA
	MseI_96-barcodes_26	TAACTCACACGNNNNNNNNGATCGTCGGACTGTAGAACTCTGAACCCCTATAGTGAGTCGTATTACCGGCCTCAATCGAA
	MseI_96-barcodes_27	TAACTCGTGTCNNNNNNNNGATCGTCGGACTGTAGAACTCTGAACCCCTATAGTGAGTCGTATTACCGGCCTCAATCGAA
	MseI_96-barcodes_28	TAACTCCACATNNNNNNNNGATCGTCGGACTGTAGAACTCTGAACCCCTATAGTGAGTCGTATTACCGGCCTCAATCGAA
	MseI_96-barcodes_29	TAAGCGGTTAGNNNNNNNNGATCGTCGGACTGTAGAACTCTGAACCCCTATAGTGAGTCGTATTACCGGCCTCAATCGAA
	MseI_96-barcodes_30	TAAGCGCAAGCNNNNNNNNGATCGTCGGACTGTAGAACTCTGAACCCCTATAGTGAGTCGTATTACCGGCCTCAATCGAA
	MseI_96-barcodes_31	TAAGCGTGGCTNNNNNNNNGATCGTCGGACTGTAGAACTCTGAACCCCTATAGTGAGTCGTATTACCGGCCTCAATCGAA
	MseI_96-barcodes_32	TAAGCGACCTANNNNNNNNGATCGTCGGACTGTAGAACTCTGAACCCCTATAGTGAGTCGTATTACCGGCCTCAATCGAA
	MseI_96-barcodes_33	TAATGAGTTAGNNNNNNNNGATCGTCGGACTGTAGAACTCTGAACCCCTATAGTGAGTCGTATTACCGGCCTCAATCGAA
	MseI_96-barcodes_34	TAATGACAAGCNNNNNNNNGATCGTCGGACTGTAGAACTCTGAACCCCTATAGTGAGTCGTATTACCGGCCTCAATCGAA
	MseI_96-barcodes_35	TAATGATGGCTNNNNNNNNGATCGTCGGACTGTAGAACTCTGAACCCCTATAGTGAGTCGTATTACCGGCCTCAATCGAA
	MseI_96-barcodes_36	TAATGAACCTANNNNNNNNGATCGTCGGACTGTAGAACTCTGAACCCCTATAGTGAGTCGTATTACCGGCCTCAATCGAA
	MseI_96-barcodes_37	TAACTCGTTAGNNNNNNNNGATCGTCGGACTGTAGAACTCTGAACCCCTATAGTGAGTCGTATTACCGGCCTCAATCGAA
	MseI_96-barcodes_38	TAACTCCAAGCNNNNNNNNGATCGTCGGACTGTAGAACTCTGAACCCCTATAGTGAGTCGTATTACCGGCCTCAATCGAA
	MseI_96-barcodes_39	TAACTCTGGCTNNNNNNNNGATCGTCGGACTGTAGAACTCTGAACCCCTATAGTGAGTCGTATTACCGGCCTCAATCGAA
	MseI_96-barcodes_40	TAACTCACCTANNNNNNNNGATCGTCGGACTGTAGAACTCTGAACCCCTATAGTGAGTCGTATTACCGGCCTCAATCGAA
	MseI_96-barcodes_41	TAATCGGATTCNNNNNNNNGATCGTCGGACTGTAGAACTCTGAACCCCTATAGTGAGTCGTATTACCGGCCTCAATCGAA
	MseI_96-barcodes_42	TAATCGCGAATNNNNNNNNGATCGTCGGACTGTAGAACTCTGAACCCCTATAGTGAGTCGTATTACCGGCCTCAATCGAA
	MseI_96-barcodes_43	TAATCGTCGGANNNNNNNNGATCGTCGGACTGTAGAACTCTGAACCCCTATAGTGAGTCGTATTACCGGCCTCAATCGAA
	MseI_96-barcodes_44	TAATCGATCCGNNNNNNNNGATCGTCGGACTGTAGAACTCTGAACCCCTATAGTGAGTCGTATTACCGGCCTCAATCGAA
	MseI_96-barcodes_45	TAAGATGATTCNNNNNNNNGATCGTCGGACTGTAGAACTCTGAACCCCTATAGTGAGTCGTATTACCGGCCTCAATCGAA
	MseI_96-barcodes_46	TAAGATCGAATNNNNNNNNGATCGTCGGACTGTAGAACTCTGAACCCCTATAGTGAGTCGTATTACCGGCCTCAATCGAA
	MseI_96-barcodes_47	TAAGATTCGGANNNNNNNNGATCGTCGGACTGTAGAACTCTGAACCCCTATAGTGAGTCGTATTACCGGCCTCAATCGAA
	MseI_96-barcodes_48	TAAGATATCCGNNNNNNNNGATCGTCGGACTGTAGAACTCTGAACCCCTATAGTGAGTCGTATTACCGGCCTCAATCGAA
	MseI_96-barcodes_49	TAACGAGATTCNNNNNNNNGATCGTCGGACTGTAGAACTCTGAACCCCTATAGTGAGTCGTATTACCGGCCTCAATCGAA
	MseI_96-barcodes_50	TAACGACGAATNNNNNNNNGATCGTCGGACTGTAGAACTCTGAACCCCTATAGTGAGTCGTATTACCGGCCTCAATCGAA
	MseI_96-barcodes_51	TAACGATCGGANNNNNNNNGATCGTCGGACTGTAGAACTCTGAACCCCTATAGTGAGTCGTATTACCGGCCTCAATCGAA
	MseI_96-barcodes_52	TAACGAATCCGNNNNNNNNGATCGTCGGACTGTAGAACTCTGAACCCCTATAGTGAGTCGTATTACCGGCCTCAATCGAA
	MseI_96-barcodes_53	TAAATCGATTCNNNNNNNNGATCGTCGGACTGTAGAACTCTGAACCCCTATAGTGAGTCGTATTACCGGCCTCAATCGAA
	MseI_96-barcodes_54	TAAATCCGAATNNNNNNNNGATCGTCGGACTGTAGAACTCTGAACCCCTATAGTGAGTCGTATTACCGGCCTCAATCGAA
	MseI_96-barcodes_55	TAAATCTCGGANNNNNNNNGATCGTCGGACTGTAGAACTCTGAACCCCTATAGTGAGTCGTATTACCGGCCTCAATCGAA
	MseI_96-barcodes_56	TAAATCATCCGNNNNNNNNGATCGTCGGACTGTAGAACTCTGAACCCCTATAGTGAGTCGTATTACCGGCCTCAATCGAA
	MseI_96-barcodes_57	TAATCGACGCTNNNNNNNNGATCGTCGGACTGTAGAACTCTGAACCCCTATAGTGAGTCGTATTACCGGCCTCAATCGAA
	MseI_96-barcodes_58	TAATCGGTCTANNNNNNNNGATCGTCGGACTGTAGAACTCTGAACCCCTATAGTGAGTCGTATTACCGGCCTCAATCGAA
	MseI_96-barcodes_59	TAATCGCATAGNNNNNNNNGATCGTCGGACTGTAGAACTCTGAACCCCTATAGTGAGTCGTATTACCGGCCTCAATCGAA
	MseI_96-barcodes_60	TAATCGTGAGCNNNNNNNNGATCGTCGGACTGTAGAACTCTGAACCCCTATAGTGAGTCGTATTACCGGCCTCAATCGAA
	MseI_96-barcodes_61	TAAGATACGCTNNNNNNNNGATCGTCGGACTGTAGAACTCTGAACCCCTATAGTGAGTCGTATTACCGGCCTCAATCGAA
	MseI_96-barcodes_62	TAAGATGTCTANNNNNNNNGATCGTCGGACTGTAGAACTCTGAACCCCTATAGTGAGTCGTATTACCGGCCTCAATCGAA
	MseI_96-barcodes_63	TAAGATCATAGNNNNNNNNGATCGTCGGACTGTAGAACTCTGAACCCCTATAGTGAGTCGTATTACCGGCCTCAATCGAA
	MseI_96-barcodes_64	TAAGATTGAGCNNNNNNNNGATCGTCGGACTGTAGAACTCTGAACCCCTATAGTGAGTCGTATTACCGGCCTCAATCGAA
	MseI_96-barcodes_65	TAACGAACGCTNNNNNNNNGATCGTCGGACTGTAGAACTCTGAACCCCTATAGTGAGTCGTATTACCGGCCTCAATCGAA
	MseI_96-barcodes_66	TAACGAGTCTANNNNNNNNGATCGTCGGACTGTAGAACTCTGAACCCCTATAGTGAGTCGTATTACCGGCCTCAATCGAA
	MseI_96-barcodes_67	TAACGACATAGNNNNNNNNGATCGTCGGACTGTAGAACTCTGAACCCCTATAGTGAGTCGTATTACCGGCCTCAATCGAA
	MseI_96-barcodes_68	TAACGATGAGCNNNNNNNNGATCGTCGGACTGTAGAACTCTGAACCCCTATAGTGAGTCGTATTACCGGCCTCAATCGAA
	MseI_96-barcodes_69	TAAATCACGCTNNNNNNNNGATCGTCGGACTGTAGAACTCTGAACCCCTATAGTGAGTCGTATTACCGGCCTCAATCGAA
	MseI_96-barcodes_70	TAAATCGTCTANNNNNNNNGATCGTCGGACTGTAGAACTCTGAACCCCTATAGTGAGTCGTATTACCGGCCTCAATCGAA
	MseI_96-barcodes_71	TAAATCCATAGNNNNNNNNGATCGTCGGACTGTAGAACTCTGAACCCCTATAGTGAGTCGTATTACCGGCCTCAATCGAA
	MseI_96-barcodes_72	TAAATCTGAGCNNNNNNNNGATCGTCGGACTGTAGAACTCTGAACCCCTATAGTGAGTCGTATTACCGGCCTCAATCGAA
	MseI_96-barcodes_73	TAATCGTCAGTNNNNNNNNGATCGTCGGACTGTAGAACTCTGAACCCCTATAGTGAGTCGTATTACCGGCCTCAATCGAA
	MseI_96-barcodes_74	TAATCGATGCANNNNNNNNGATCGTCGGACTGTAGAACTCTGAACCCCTATAGTGAGTCGTATTACCGGCCTCAATCGAA
	MseI_96-barcodes_75	TAATCGGACTGNNNNNNNNGATCGTCGGACTGTAGAACTCTGAACCCCTATAGTGAGTCGTATTACCGGCCTCAATCGAA
	MseI_96-barcodes_76	TAATCGCGTACNNNNNNNNGATCGTCGGACTGTAGAACTCTGAACCCCTATAGTGAGTCGTATTACCGGCCTCAATCGAA
	MseI_96-barcodes_77	TAAGATTCAGTNNNNNNNNGATCGTCGGACTGTAGAACTCTGAACCCCTATAGTGAGTCGTATTACCGGCCTCAATCGAA
	MseI_96-barcodes_78	TAAGATATGCANNNNNNNNGATCGTCGGACTGTAGAACTCTGAACCCCTATAGTGAGTCGTATTACCGGCCTCAATCGAA
	MseI_96-barcodes_79	TAAGATGACTGNNNNNNNNGATCGTCGGACTGTAGAACTCTGAACCCCTATAGTGAGTCGTATTACCGGCCTCAATCGAA
	MseI_96-barcodes_80	TAAGATCGTACNNNNNNNNGATCGTCGGACTGTAGAACTCTGAACCCCTATAGTGAGTCGTATTACCGGCCTCAATCGAA
	MseI_96-barcodes_81	TAACGATCAGTNNNNNNNNGATCGTCGGACTGTAGAACTCTGAACCCCTATAGTGAGTCGTATTACCGGCCTCAATCGAA
	MseI_96-barcodes_82	TAACGAATGCANNNNNNNNGATCGTCGGACTGTAGAACTCTGAACCCCTATAGTGAGTCGTATTACCGGCCTCAATCGAA
	MseI_96-barcodes_83	TAACGAGACTGNNNNNNNNGATCGTCGGACTGTAGAACTCTGAACCCCTATAGTGAGTCGTATTACCGGCCTCAATCGAA
	MseI_96-barcodes_84	TAACGACGTACNNNNNNNNGATCGTCGGACTGTAGAACTCTGAACCCCTATAGTGAGTCGTATTACCGGCCTCAATCGAA
	MseI_96-barcodes_85	TAAATCTCAGTNNNNNNNNGATCGTCGGACTGTAGAACTCTGAACCCCTATAGTGAGTCGTATTACCGGCCTCAATCGAA
	MseI_96-barcodes_86	TAAATCATGCANNNNNNNNGATCGTCGGACTGTAGAACTCTGAACCCCTATAGTGAGTCGTATTACCGGCCTCAATCGAA
	MseI_96-barcodes_87	TAAATCGACTGNNNNNNNNGATCGTCGGACTGTAGAACTCTGAACCCCTATAGTGAGTCGTATTACCGGCCTCAATCGAA
	MseI_96-barcodes_88	TAAATCCGTACNNNNNNNNGATCGTCGGACTGTAGAACTCTGAACCCCTATAGTGAGTCGTATTACCGGCCTCAATCGAA
	MseI_96-barcodes_89	TAATCGGTACANNNNNNNNGATCGTCGGACTGTAGAACTCTGAACCCCTATAGTGAGTCGTATTACCGGCCTCAATCGAA
	MseI_96-barcodes_90	TAATCGCAGTGNNNNNNNNGATCGTCGGACTGTAGAACTCTGAACCCCTATAGTGAGTCGTATTACCGGCCTCAATCGAA
	MseI_96-barcodes_91	TAATCGTGCACNNNNNNNNGATCGTCGGACTGTAGAACTCTGAACCCCTATAGTGAGTCGTATTACCGGCCTCAATCGAA
	MseI_96-barcodes_92	TAATCGACTGTNNNNNNNNGATCGTCGGACTGTAGAACTCTGAACCCCTATAGTGAGTCGTATTACCGGCCTCAATCGAA
	MseI_96-barcodes_93	TAAGATGTACANNNNNNNNGATCGTCGGACTGTAGAACTCTGAACCCCTATAGTGAGTCGTATTACCGGCCTCAATCGAA
	MseI_96-barcodes_94	TAAGATCAGTGNNNNNNNNGATCGTCGGACTGTAGAACTCTGAACCCCTATAGTGAGTCGTATTACCGGCCTCAATCGAA
	MseI_96-barcodes_95	TAAGATTGCACNNNNNNNNGATCGTCGGACTGTAGAACTCTGAACCCCTATAGTGAGTCGTATTACCGGCCTCAATCGAA
	MseI_96-barcodes_96	TAAGATACTGTNNNNNNNNGATCGTCGGACTGTAGAACTCTGAACCCCTATAGTGAGTCGTATTACCGGCCTCAATCGAA

## Sheet: MseI_Rev_96-barcodes
Supplementary Table 3. List of oligonucleotides that can be used to prepare COVseq adapters.
	Adapter ID	Sequence (5'->3')
	MseI_96-barcodes_1	CGATTGAGGCCGGTAATACGACTCACTATAGGGGTTCAGAGTTCTACAGTCCGACGATCNNNNNNNNCATCACGCT
	MseI_96-barcodes_2	CGATTGAGGCCGGTAATACGACTCACTATAGGGGTTCAGAGTTCTACAGTCCGACGATCNNNNNNNNGTCGTCGCT
	MseI_96-barcodes_3	CGATTGAGGCCGGTAATACGACTCACTATAGGGGTTCAGAGTTCTACAGTCCGACGATCNNNNNNNNACGACCGCT
	MseI_96-barcodes_4	CGATTGAGGCCGGTAATACGACTCACTATAGGGGTTCAGAGTTCTACAGTCCGACGATCNNNNNNNNTGATGCGCT
	MseI_96-barcodes_5	CGATTGAGGCCGGTAATACGACTCACTATAGGGGTTCAGAGTTCTACAGTCCGACGATCNNNNNNNNCATCAATCT
	MseI_96-barcodes_6	CGATTGAGGCCGGTAATACGACTCACTATAGGGGTTCAGAGTTCTACAGTCCGACGATCNNNNNNNNGTCGTATCT
	MseI_96-barcodes_7	CGATTGAGGCCGGTAATACGACTCACTATAGGGGTTCAGAGTTCTACAGTCCGACGATCNNNNNNNNACGACATCT
	MseI_96-barcodes_8	CGATTGAGGCCGGTAATACGACTCACTATAGGGGTTCAGAGTTCTACAGTCCGACGATCNNNNNNNNTGATGATCT
	MseI_96-barcodes_9	CGATTGAGGCCGGTAATACGACTCACTATAGGGGTTCAGAGTTCTACAGTCCGACGATCNNNNNNNNCATCATCCT
	MseI_96-barcodes_10	CGATTGAGGCCGGTAATACGACTCACTATAGGGGTTCAGAGTTCTACAGTCCGACGATCNNNNNNNNGTCGTTCCT
	MseI_96-barcodes_11	CGATTGAGGCCGGTAATACGACTCACTATAGGGGTTCAGAGTTCTACAGTCCGACGATCNNNNNNNNACGACTCCT
	MseI_96-barcodes_12	CGATTGAGGCCGGTAATACGACTCACTATAGGGGTTCAGAGTTCTACAGTCCGACGATCNNNNNNNNTGATGTCCT
	MseI_96-barcodes_13	CGATTGAGGCCGGTAATACGACTCACTATAGGGGTTCAGAGTTCTACAGTCCGACGATCNNNNNNNNCATCAGAAT
	MseI_96-barcodes_14	CGATTGAGGCCGGTAATACGACTCACTATAGGGGTTCAGAGTTCTACAGTCCGACGATCNNNNNNNNGTCGTGAAT
	MseI_96-barcodes_15	CGATTGAGGCCGGTAATACGACTCACTATAGGGGTTCAGAGTTCTACAGTCCGACGATCNNNNNNNNACGACGAAT
	MseI_96-barcodes_16	CGATTGAGGCCGGTAATACGACTCACTATAGGGGTTCAGAGTTCTACAGTCCGACGATCNNNNNNNNTGATGGAAT
	MseI_96-barcodes_17	CGATTGAGGCCGGTAATACGACTCACTATAGGGGTTCAGAGTTCTACAGTCCGACGATCNNNNNNNNTCACACGCT
	MseI_96-barcodes_18	CGATTGAGGCCGGTAATACGACTCACTATAGGGGTTCAGAGTTCTACAGTCCGACGATCNNNNNNNNCGTGTCGCT
	MseI_96-barcodes_19	CGATTGAGGCCGGTAATACGACTCACTATAGGGGTTCAGAGTTCTACAGTCCGACGATCNNNNNNNNGACACCGCT
	MseI_96-barcodes_20	CGATTGAGGCCGGTAATACGACTCACTATAGGGGTTCAGAGTTCTACAGTCCGACGATCNNNNNNNNATGTGCGCT
	MseI_96-barcodes_21	CGATTGAGGCCGGTAATACGACTCACTATAGGGGTTCAGAGTTCTACAGTCCGACGATCNNNNNNNNTCACATCAT
	MseI_96-barcodes_22	CGATTGAGGCCGGTAATACGACTCACTATAGGGGTTCAGAGTTCTACAGTCCGACGATCNNNNNNNNCGTGTTCAT
	MseI_96-barcodes_23	CGATTGAGGCCGGTAATACGACTCACTATAGGGGTTCAGAGTTCTACAGTCCGACGATCNNNNNNNNGACACTCAT
	MseI_96-barcodes_24	CGATTGAGGCCGGTAATACGACTCACTATAGGGGTTCAGAGTTCTACAGTCCGACGATCNNNNNNNNATGTGTCAT
	MseI_96-barcodes_25	CGATTGAGGCCGGTAATACGACTCACTATAGGGGTTCAGAGTTCTACAGTCCGACGATCNNNNNNNNTCACAGAGT
	MseI_96-barcodes_26	CGATTGAGGCCGGTAATACGACTCACTATAGGGGTTCAGAGTTCTACAGTCCGACGATCNNNNNNNNCGTGTGAGT
	MseI_96-barcodes_27	CGATTGAGGCCGGTAATACGACTCACTATAGGGGTTCAGAGTTCTACAGTCCGACGATCNNNNNNNNGACACGAGT
	MseI_96-barcodes_28	CGATTGAGGCCGGTAATACGACTCACTATAGGGGTTCAGAGTTCTACAGTCCGACGATCNNNNNNNNATGTGGAGT
	MseI_96-barcodes_29	CGATTGAGGCCGGTAATACGACTCACTATAGGGGTTCAGAGTTCTACAGTCCGACGATCNNNNNNNNCTAACCGCT
	MseI_96-barcodes_30	CGATTGAGGCCGGTAATACGACTCACTATAGGGGTTCAGAGTTCTACAGTCCGACGATCNNNNNNNNGCTTGCGCT
	MseI_96-barcodes_31	CGATTGAGGCCGGTAATACGACTCACTATAGGGGTTCAGAGTTCTACAGTCCGACGATCNNNNNNNNAGCCACGCT
	MseI_96-barcodes_32	CGATTGAGGCCGGTAATACGACTCACTATAGGGGTTCAGAGTTCTACAGTCCGACGATCNNNNNNNNTAGGTCGCT
	MseI_96-barcodes_33	CGATTGAGGCCGGTAATACGACTCACTATAGGGGTTCAGAGTTCTACAGTCCGACGATCNNNNNNNNCTAACTCAT
	MseI_96-barcodes_34	CGATTGAGGCCGGTAATACGACTCACTATAGGGGTTCAGAGTTCTACAGTCCGACGATCNNNNNNNNGCTTGTCAT
	MseI_96-barcodes_35	CGATTGAGGCCGGTAATACGACTCACTATAGGGGTTCAGAGTTCTACAGTCCGACGATCNNNNNNNNAGCCATCAT
	MseI_96-barcodes_36	CGATTGAGGCCGGTAATACGACTCACTATAGGGGTTCAGAGTTCTACAGTCCGACGATCNNNNNNNNTAGGTTCAT
	MseI_96-barcodes_37	CGATTGAGGCCGGTAATACGACTCACTATAGGGGTTCAGAGTTCTACAGTCCGACGATCNNNNNNNNCTAACGAGT
	MseI_96-barcodes_38	CGATTGAGGCCGGTAATACGACTCACTATAGGGGTTCAGAGTTCTACAGTCCGACGATCNNNNNNNNGCTTGGAGT
	MseI_96-barcodes_39	CGATTGAGGCCGGTAATACGACTCACTATAGGGGTTCAGAGTTCTACAGTCCGACGATCNNNNNNNNAGCCAGAGT
	MseI_96-barcodes_40	CGATTGAGGCCGGTAATACGACTCACTATAGGGGTTCAGAGTTCTACAGTCCGACGATCNNNNNNNNTAGGTGAGT
	MseI_96-barcodes_41	CGATTGAGGCCGGTAATACGACTCACTATAGGGGTTCAGAGTTCTACAGTCCGACGATCNNNNNNNNGAATCCGAT
	MseI_96-barcodes_42	CGATTGAGGCCGGTAATACGACTCACTATAGGGGTTCAGAGTTCTACAGTCCGACGATCNNNNNNNNATTCGCGAT
	MseI_96-barcodes_43	CGATTGAGGCCGGTAATACGACTCACTATAGGGGTTCAGAGTTCTACAGTCCGACGATCNNNNNNNNTCCGACGAT
	MseI_96-barcodes_44	CGATTGAGGCCGGTAATACGACTCACTATAGGGGTTCAGAGTTCTACAGTCCGACGATCNNNNNNNNCGGATCGAT
	MseI_96-barcodes_45	CGATTGAGGCCGGTAATACGACTCACTATAGGGGTTCAGAGTTCTACAGTCCGACGATCNNNNNNNNGAATCATCT
	MseI_96-barcodes_46	CGATTGAGGCCGGTAATACGACTCACTATAGGGGTTCAGAGTTCTACAGTCCGACGATCNNNNNNNNATTCGATCT
	MseI_96-barcodes_47	CGATTGAGGCCGGTAATACGACTCACTATAGGGGTTCAGAGTTCTACAGTCCGACGATCNNNNNNNNTCCGAATCT
	MseI_96-barcodes_48	CGATTGAGGCCGGTAATACGACTCACTATAGGGGTTCAGAGTTCTACAGTCCGACGATCNNNNNNNNCGGATATCT
	MseI_96-barcodes_49	CGATTGAGGCCGGTAATACGACTCACTATAGGGGTTCAGAGTTCTACAGTCCGACGATCNNNNNNNNGAATCTCGT
	MseI_96-barcodes_50	CGATTGAGGCCGGTAATACGACTCACTATAGGGGTTCAGAGTTCTACAGTCCGACGATCNNNNNNNNATTCGTCGT
	MseI_96-barcodes_51	CGATTGAGGCCGGTAATACGACTCACTATAGGGGTTCAGAGTTCTACAGTCCGACGATCNNNNNNNNTCCGATCGT
	MseI_96-barcodes_52	CGATTGAGGCCGGTAATACGACTCACTATAGGGGTTCAGAGTTCTACAGTCCGACGATCNNNNNNNNCGGATTCGT
	MseI_96-barcodes_53	CGATTGAGGCCGGTAATACGACTCACTATAGGGGTTCAGAGTTCTACAGTCCGACGATCNNNNNNNNGAATCGATT
	MseI_96-barcodes_54	CGATTGAGGCCGGTAATACGACTCACTATAGGGGTTCAGAGTTCTACAGTCCGACGATCNNNNNNNNATTCGGATT
	MseI_96-barcodes_55	CGATTGAGGCCGGTAATACGACTCACTATAGGGGTTCAGAGTTCTACAGTCCGACGATCNNNNNNNNTCCGAGATT
	MseI_96-barcodes_56	CGATTGAGGCCGGTAATACGACTCACTATAGGGGTTCAGAGTTCTACAGTCCGACGATCNNNNNNNNCGGATGATT
	MseI_96-barcodes_57	CGATTGAGGCCGGTAATACGACTCACTATAGGGGTTCAGAGTTCTACAGTCCGACGATCNNNNNNNNAGCGTCGAT
	MseI_96-barcodes_58	CGATTGAGGCCGGTAATACGACTCACTATAGGGGTTCAGAGTTCTACAGTCCGACGATCNNNNNNNNTAGACCGAT
	MseI_96-barcodes_59	CGATTGAGGCCGGTAATACGACTCACTATAGGGGTTCAGAGTTCTACAGTCCGACGATCNNNNNNNNCTATGCGAT
	MseI_96-barcodes_60	CGATTGAGGCCGGTAATACGACTCACTATAGGGGTTCAGAGTTCTACAGTCCGACGATCNNNNNNNNGCTCACGAT
	MseI_96-barcodes_61	CGATTGAGGCCGGTAATACGACTCACTATAGGGGTTCAGAGTTCTACAGTCCGACGATCNNNNNNNNAGCGTATCT
	MseI_96-barcodes_62	CGATTGAGGCCGGTAATACGACTCACTATAGGGGTTCAGAGTTCTACAGTCCGACGATCNNNNNNNNTAGACATCT
	MseI_96-barcodes_63	CGATTGAGGCCGGTAATACGACTCACTATAGGGGTTCAGAGTTCTACAGTCCGACGATCNNNNNNNNCTATGATCT
	MseI_96-barcodes_64	CGATTGAGGCCGGTAATACGACTCACTATAGGGGTTCAGAGTTCTACAGTCCGACGATCNNNNNNNNGCTCAATCT
	MseI_96-barcodes_65	CGATTGAGGCCGGTAATACGACTCACTATAGGGGTTCAGAGTTCTACAGTCCGACGATCNNNNNNNNAGCGTTCGT
	MseI_96-barcodes_66	CGATTGAGGCCGGTAATACGACTCACTATAGGGGTTCAGAGTTCTACAGTCCGACGATCNNNNNNNNTAGACTCGT
	MseI_96-barcodes_67	CGATTGAGGCCGGTAATACGACTCACTATAGGGGTTCAGAGTTCTACAGTCCGACGATCNNNNNNNNCTATGTCGT
	MseI_96-barcodes_68	CGATTGAGGCCGGTAATACGACTCACTATAGGGGTTCAGAGTTCTACAGTCCGACGATCNNNNNNNNGCTCATCGT
	MseI_96-barcodes_69	CGATTGAGGCCGGTAATACGACTCACTATAGGGGTTCAGAGTTCTACAGTCCGACGATCNNNNNNNNAGCGTGATT
	MseI_96-barcodes_70	CGATTGAGGCCGGTAATACGACTCACTATAGGGGTTCAGAGTTCTACAGTCCGACGATCNNNNNNNNTAGACGATT
	MseI_96-barcodes_71	CGATTGAGGCCGGTAATACGACTCACTATAGGGGTTCAGAGTTCTACAGTCCGACGATCNNNNNNNNCTATGGATT
	MseI_96-barcodes_72	CGATTGAGGCCGGTAATACGACTCACTATAGGGGTTCAGAGTTCTACAGTCCGACGATCNNNNNNNNGCTCAGATT
	MseI_96-barcodes_73	CGATTGAGGCCGGTAATACGACTCACTATAGGGGTTCAGAGTTCTACAGTCCGACGATCNNNNNNNNACTGACGAT
	MseI_96-barcodes_74	CGATTGAGGCCGGTAATACGACTCACTATAGGGGTTCAGAGTTCTACAGTCCGACGATCNNNNNNNNTGCATCGAT
	MseI_96-barcodes_75	CGATTGAGGCCGGTAATACGACTCACTATAGGGGTTCAGAGTTCTACAGTCCGACGATCNNNNNNNNCAGTCCGAT
	MseI_96-barcodes_76	CGATTGAGGCCGGTAATACGACTCACTATAGGGGTTCAGAGTTCTACAGTCCGACGATCNNNNNNNNGTACGCGAT
	MseI_96-barcodes_77	CGATTGAGGCCGGTAATACGACTCACTATAGGGGTTCAGAGTTCTACAGTCCGACGATCNNNNNNNNACTGAATCT
	MseI_96-barcodes_78	CGATTGAGGCCGGTAATACGACTCACTATAGGGGTTCAGAGTTCTACAGTCCGACGATCNNNNNNNNTGCATATCT
	MseI_96-barcodes_79	CGATTGAGGCCGGTAATACGACTCACTATAGGGGTTCAGAGTTCTACAGTCCGACGATCNNNNNNNNCAGTCATCT
	MseI_96-barcodes_80	CGATTGAGGCCGGTAATACGACTCACTATAGGGGTTCAGAGTTCTACAGTCCGACGATCNNNNNNNNGTACGATCT
	MseI_96-barcodes_81	CGATTGAGGCCGGTAATACGACTCACTATAGGGGTTCAGAGTTCTACAGTCCGACGATCNNNNNNNNACTGATCGT
	MseI_96-barcodes_82	CGATTGAGGCCGGTAATACGACTCACTATAGGGGTTCAGAGTTCTACAGTCCGACGATCNNNNNNNNTGCATTCGT
	MseI_96-barcodes_83	CGATTGAGGCCGGTAATACGACTCACTATAGGGGTTCAGAGTTCTACAGTCCGACGATCNNNNNNNNCAGTCTCGT
	MseI_96-barcodes_84	CGATTGAGGCCGGTAATACGACTCACTATAGGGGTTCAGAGTTCTACAGTCCGACGATCNNNNNNNNGTACGTCGT
	MseI_96-barcodes_85	CGATTGAGGCCGGTAATACGACTCACTATAGGGGTTCAGAGTTCTACAGTCCGACGATCNNNNNNNNACTGAGATT
	MseI_96-barcodes_86	CGATTGAGGCCGGTAATACGACTCACTATAGGGGTTCAGAGTTCTACAGTCCGACGATCNNNNNNNNTGCATGATT
	MseI_96-barcodes_87	CGATTGAGGCCGGTAATACGACTCACTATAGGGGTTCAGAGTTCTACAGTCCGACGATCNNNNNNNNCAGTCGATT
	MseI_96-barcodes_88	CGATTGAGGCCGGTAATACGACTCACTATAGGGGTTCAGAGTTCTACAGTCCGACGATCNNNNNNNNGTACGGATT
	MseI_96-barcodes_89	CGATTGAGGCCGGTAATACGACTCACTATAGGGGTTCAGAGTTCTACAGTCCGACGATCNNNNNNNNTGTACCGAT
	MseI_96-barcodes_90	CGATTGAGGCCGGTAATACGACTCACTATAGGGGTTCAGAGTTCTACAGTCCGACGATCNNNNNNNNCACTGCGAT
	MseI_96-barcodes_91	CGATTGAGGCCGGTAATACGACTCACTATAGGGGTTCAGAGTTCTACAGTCCGACGATCNNNNNNNNGTGCACGAT
	MseI_96-barcodes_92	CGATTGAGGCCGGTAATACGACTCACTATAGGGGTTCAGAGTTCTACAGTCCGACGATCNNNNNNNNACAGTCGAT
	MseI_96-barcodes_93	CGATTGAGGCCGGTAATACGACTCACTATAGGGGTTCAGAGTTCTACAGTCCGACGATCNNNNNNNNTGTACATCT
	MseI_96-barcodes_94	CGATTGAGGCCGGTAATACGACTCACTATAGGGGTTCAGAGTTCTACAGTCCGACGATCNNNNNNNNCACTGATCT
	MseI_96-barcodes_95	CGATTGAGGCCGGTAATACGACTCACTATAGGGGTTCAGAGTTCTACAGTCCGACGATCNNNNNNNNGTGCAATCT
	MseI_96-barcodes_96	CGATTGAGGCCGGTAATACGACTCACTATAGGGGTTCAGAGTTCTACAGTCCGACGATCNNNNNNNNACAGTATCT

## Sheet: NlaIII_For_96-barcodes
Supplementary Table 3. List of oligonucleotides that can be used to prepare COVseq adapters.
	Adapter ID	Sequence (5'->3')
	NlaIII_96-barcodes_1	GCGTGATGNNNNNNNNGATCGTCGGACTGTAGAACTCTGAACCCCTATAGTGAGTCGTATTACCGGCCTCAATCGAA
	NlaIII_96-barcodes_2	GCGACGACNNNNNNNNGATCGTCGGACTGTAGAACTCTGAACCCCTATAGTGAGTCGTATTACCGGCCTCAATCGAA
	NlaIII_96-barcodes_3	GCGGTCGTNNNNNNNNGATCGTCGGACTGTAGAACTCTGAACCCCTATAGTGAGTCGTATTACCGGCCTCAATCGAA
	NlaIII_96-barcodes_4	GCGCATCANNNNNNNNGATCGTCGGACTGTAGAACTCTGAACCCCTATAGTGAGTCGTATTACCGGCCTCAATCGAA
	NlaIII_96-barcodes_5	GATTGATGNNNNNNNNGATCGTCGGACTGTAGAACTCTGAACCCCTATAGTGAGTCGTATTACCGGCCTCAATCGAA
	NlaIII_96-barcodes_6	GATACGACNNNNNNNNGATCGTCGGACTGTAGAACTCTGAACCCCTATAGTGAGTCGTATTACCGGCCTCAATCGAA
	NlaIII_96-barcodes_7	GATGTCGTNNNNNNNNGATCGTCGGACTGTAGAACTCTGAACCCCTATAGTGAGTCGTATTACCGGCCTCAATCGAA
	NlaIII_96-barcodes_8	GATCATCANNNNNNNNGATCGTCGGACTGTAGAACTCTGAACCCCTATAGTGAGTCGTATTACCGGCCTCAATCGAA
	NlaIII_96-barcodes_9	GGATGATGNNNNNNNNGATCGTCGGACTGTAGAACTCTGAACCCCTATAGTGAGTCGTATTACCGGCCTCAATCGAA
	NlaIII_96-barcodes_10	GGAACGACNNNNNNNNGATCGTCGGACTGTAGAACTCTGAACCCCTATAGTGAGTCGTATTACCGGCCTCAATCGAA
	NlaIII_96-barcodes_11	GGAGTCGTNNNNNNNNGATCGTCGGACTGTAGAACTCTGAACCCCTATAGTGAGTCGTATTACCGGCCTCAATCGAA
	NlaIII_96-barcodes_12	GGACATCANNNNNNNNGATCGTCGGACTGTAGAACTCTGAACCCCTATAGTGAGTCGTATTACCGGCCTCAATCGAA
	NlaIII_96-barcodes_13	TTCTGATGNNNNNNNNGATCGTCGGACTGTAGAACTCTGAACCCCTATAGTGAGTCGTATTACCGGCCTCAATCGAA
	NlaIII_96-barcodes_14	TTCACGACNNNNNNNNGATCGTCGGACTGTAGAACTCTGAACCCCTATAGTGAGTCGTATTACCGGCCTCAATCGAA
	NlaIII_96-barcodes_15	TTCGTCGTNNNNNNNNGATCGTCGGACTGTAGAACTCTGAACCCCTATAGTGAGTCGTATTACCGGCCTCAATCGAA
	NlaIII_96-barcodes_16	TTCCATCANNNNNNNNGATCGTCGGACTGTAGAACTCTGAACCCCTATAGTGAGTCGTATTACCGGCCTCAATCGAA
	NlaIII_96-barcodes_17	GCGTGTGANNNNNNNNGATCGTCGGACTGTAGAACTCTGAACCCCTATAGTGAGTCGTATTACCGGCCTCAATCGAA
	NlaIII_96-barcodes_18	GCGACACGNNNNNNNNGATCGTCGGACTGTAGAACTCTGAACCCCTATAGTGAGTCGTATTACCGGCCTCAATCGAA
	NlaIII_96-barcodes_19	GCGGTGTCNNNNNNNNGATCGTCGGACTGTAGAACTCTGAACCCCTATAGTGAGTCGTATTACCGGCCTCAATCGAA
	NlaIII_96-barcodes_20	GCGCACATNNNNNNNNGATCGTCGGACTGTAGAACTCTGAACCCCTATAGTGAGTCGTATTACCGGCCTCAATCGAA
	NlaIII_96-barcodes_21	TGATGTGANNNNNNNNGATCGTCGGACTGTAGAACTCTGAACCCCTATAGTGAGTCGTATTACCGGCCTCAATCGAA
	NlaIII_96-barcodes_22	TGAACACGNNNNNNNNGATCGTCGGACTGTAGAACTCTGAACCCCTATAGTGAGTCGTATTACCGGCCTCAATCGAA
	NlaIII_96-barcodes_23	TGAGTGTCNNNNNNNNGATCGTCGGACTGTAGAACTCTGAACCCCTATAGTGAGTCGTATTACCGGCCTCAATCGAA
	NlaIII_96-barcodes_24	TGACACATNNNNNNNNGATCGTCGGACTGTAGAACTCTGAACCCCTATAGTGAGTCGTATTACCGGCCTCAATCGAA
	NlaIII_96-barcodes_25	CTCTGTGANNNNNNNNGATCGTCGGACTGTAGAACTCTGAACCCCTATAGTGAGTCGTATTACCGGCCTCAATCGAA
	NlaIII_96-barcodes_26	CTCACACGNNNNNNNNGATCGTCGGACTGTAGAACTCTGAACCCCTATAGTGAGTCGTATTACCGGCCTCAATCGAA
	NlaIII_96-barcodes_27	CTCGTGTCNNNNNNNNGATCGTCGGACTGTAGAACTCTGAACCCCTATAGTGAGTCGTATTACCGGCCTCAATCGAA
	NlaIII_96-barcodes_28	CTCCACATNNNNNNNNGATCGTCGGACTGTAGAACTCTGAACCCCTATAGTGAGTCGTATTACCGGCCTCAATCGAA
	NlaIII_96-barcodes_29	GCGGTTAGNNNNNNNNGATCGTCGGACTGTAGAACTCTGAACCCCTATAGTGAGTCGTATTACCGGCCTCAATCGAA
	NlaIII_96-barcodes_30	GCGCAAGCNNNNNNNNGATCGTCGGACTGTAGAACTCTGAACCCCTATAGTGAGTCGTATTACCGGCCTCAATCGAA
	NlaIII_96-barcodes_31	GCGTGGCTNNNNNNNNGATCGTCGGACTGTAGAACTCTGAACCCCTATAGTGAGTCGTATTACCGGCCTCAATCGAA
	NlaIII_96-barcodes_32	GCGACCTANNNNNNNNGATCGTCGGACTGTAGAACTCTGAACCCCTATAGTGAGTCGTATTACCGGCCTCAATCGAA
	NlaIII_96-barcodes_33	TGAGTTAGNNNNNNNNGATCGTCGGACTGTAGAACTCTGAACCCCTATAGTGAGTCGTATTACCGGCCTCAATCGAA
	NlaIII_96-barcodes_34	TGACAAGCNNNNNNNNGATCGTCGGACTGTAGAACTCTGAACCCCTATAGTGAGTCGTATTACCGGCCTCAATCGAA
	NlaIII_96-barcodes_35	TGATGGCTNNNNNNNNGATCGTCGGACTGTAGAACTCTGAACCCCTATAGTGAGTCGTATTACCGGCCTCAATCGAA
	NlaIII_96-barcodes_36	TGAACCTANNNNNNNNGATCGTCGGACTGTAGAACTCTGAACCCCTATAGTGAGTCGTATTACCGGCCTCAATCGAA
	NlaIII_96-barcodes_37	CTCGTTAGNNNNNNNNGATCGTCGGACTGTAGAACTCTGAACCCCTATAGTGAGTCGTATTACCGGCCTCAATCGAA
	NlaIII_96-barcodes_38	CTCCAAGCNNNNNNNNGATCGTCGGACTGTAGAACTCTGAACCCCTATAGTGAGTCGTATTACCGGCCTCAATCGAA
	NlaIII_96-barcodes_39	CTCTGGCTNNNNNNNNGATCGTCGGACTGTAGAACTCTGAACCCCTATAGTGAGTCGTATTACCGGCCTCAATCGAA
	NlaIII_96-barcodes_40	CTCACCTANNNNNNNNGATCGTCGGACTGTAGAACTCTGAACCCCTATAGTGAGTCGTATTACCGGCCTCAATCGAA
	NlaIII_96-barcodes_41	TCGGATTCNNNNNNNNGATCGTCGGACTGTAGAACTCTGAACCCCTATAGTGAGTCGTATTACCGGCCTCAATCGAA
	NlaIII_96-barcodes_42	TCGCGAATNNNNNNNNGATCGTCGGACTGTAGAACTCTGAACCCCTATAGTGAGTCGTATTACCGGCCTCAATCGAA
	NlaIII_96-barcodes_43	TCGTCGGANNNNNNNNGATCGTCGGACTGTAGAACTCTGAACCCCTATAGTGAGTCGTATTACCGGCCTCAATCGAA
	NlaIII_96-barcodes_44	TCGATCCGNNNNNNNNGATCGTCGGACTGTAGAACTCTGAACCCCTATAGTGAGTCGTATTACCGGCCTCAATCGAA
	NlaIII_96-barcodes_45	GATGATTCNNNNNNNNGATCGTCGGACTGTAGAACTCTGAACCCCTATAGTGAGTCGTATTACCGGCCTCAATCGAA
	NlaIII_96-barcodes_46	GATCGAATNNNNNNNNGATCGTCGGACTGTAGAACTCTGAACCCCTATAGTGAGTCGTATTACCGGCCTCAATCGAA
	NlaIII_96-barcodes_47	GATTCGGANNNNNNNNGATCGTCGGACTGTAGAACTCTGAACCCCTATAGTGAGTCGTATTACCGGCCTCAATCGAA
	NlaIII_96-barcodes_48	GATATCCGNNNNNNNNGATCGTCGGACTGTAGAACTCTGAACCCCTATAGTGAGTCGTATTACCGGCCTCAATCGAA
	NlaIII_96-barcodes_49	CGAGATTCNNNNNNNNGATCGTCGGACTGTAGAACTCTGAACCCCTATAGTGAGTCGTATTACCGGCCTCAATCGAA
	NlaIII_96-barcodes_50	CGACGAATNNNNNNNNGATCGTCGGACTGTAGAACTCTGAACCCCTATAGTGAGTCGTATTACCGGCCTCAATCGAA
	NlaIII_96-barcodes_51	CGATCGGANNNNNNNNGATCGTCGGACTGTAGAACTCTGAACCCCTATAGTGAGTCGTATTACCGGCCTCAATCGAA
	NlaIII_96-barcodes_52	CGAATCCGNNNNNNNNGATCGTCGGACTGTAGAACTCTGAACCCCTATAGTGAGTCGTATTACCGGCCTCAATCGAA
	NlaIII_96-barcodes_53	ATCGATTCNNNNNNNNGATCGTCGGACTGTAGAACTCTGAACCCCTATAGTGAGTCGTATTACCGGCCTCAATCGAA
	NlaIII_96-barcodes_54	ATCCGAATNNNNNNNNGATCGTCGGACTGTAGAACTCTGAACCCCTATAGTGAGTCGTATTACCGGCCTCAATCGAA
	NlaIII_96-barcodes_55	ATCTCGGANNNNNNNNGATCGTCGGACTGTAGAACTCTGAACCCCTATAGTGAGTCGTATTACCGGCCTCAATCGAA
	NlaIII_96-barcodes_56	ATCATCCGNNNNNNNNGATCGTCGGACTGTAGAACTCTGAACCCCTATAGTGAGTCGTATTACCGGCCTCAATCGAA
	NlaIII_96-barcodes_57	TCGACGCTNNNNNNNNGATCGTCGGACTGTAGAACTCTGAACCCCTATAGTGAGTCGTATTACCGGCCTCAATCGAA
	NlaIII_96-barcodes_58	TCGGTCTANNNNNNNNGATCGTCGGACTGTAGAACTCTGAACCCCTATAGTGAGTCGTATTACCGGCCTCAATCGAA
	NlaIII_96-barcodes_59	TCGCATAGNNNNNNNNGATCGTCGGACTGTAGAACTCTGAACCCCTATAGTGAGTCGTATTACCGGCCTCAATCGAA
	NlaIII_96-barcodes_60	TCGTGAGCNNNNNNNNGATCGTCGGACTGTAGAACTCTGAACCCCTATAGTGAGTCGTATTACCGGCCTCAATCGAA
	NlaIII_96-barcodes_61	GATACGCTNNNNNNNNGATCGTCGGACTGTAGAACTCTGAACCCCTATAGTGAGTCGTATTACCGGCCTCAATCGAA
	NlaIII_96-barcodes_62	GATGTCTANNNNNNNNGATCGTCGGACTGTAGAACTCTGAACCCCTATAGTGAGTCGTATTACCGGCCTCAATCGAA
	NlaIII_96-barcodes_63	GATCATAGNNNNNNNNGATCGTCGGACTGTAGAACTCTGAACCCCTATAGTGAGTCGTATTACCGGCCTCAATCGAA
	NlaIII_96-barcodes_64	GATTGAGCNNNNNNNNGATCGTCGGACTGTAGAACTCTGAACCCCTATAGTGAGTCGTATTACCGGCCTCAATCGAA
	NlaIII_96-barcodes_65	CGAACGCTNNNNNNNNGATCGTCGGACTGTAGAACTCTGAACCCCTATAGTGAGTCGTATTACCGGCCTCAATCGAA
	NlaIII_96-barcodes_66	CGAGTCTANNNNNNNNGATCGTCGGACTGTAGAACTCTGAACCCCTATAGTGAGTCGTATTACCGGCCTCAATCGAA
	NlaIII_96-barcodes_67	CGACATAGNNNNNNNNGATCGTCGGACTGTAGAACTCTGAACCCCTATAGTGAGTCGTATTACCGGCCTCAATCGAA
	NlaIII_96-barcodes_68	CGATGAGCNNNNNNNNGATCGTCGGACTGTAGAACTCTGAACCCCTATAGTGAGTCGTATTACCGGCCTCAATCGAA
	NlaIII_96-barcodes_69	ATCACGCTNNNNNNNNGATCGTCGGACTGTAGAACTCTGAACCCCTATAGTGAGTCGTATTACCGGCCTCAATCGAA
	NlaIII_96-barcodes_70	ATCGTCTANNNNNNNNGATCGTCGGACTGTAGAACTCTGAACCCCTATAGTGAGTCGTATTACCGGCCTCAATCGAA
	NlaIII_96-barcodes_71	ATCCATAGNNNNNNNNGATCGTCGGACTGTAGAACTCTGAACCCCTATAGTGAGTCGTATTACCGGCCTCAATCGAA
	NlaIII_96-barcodes_72	ATCTGAGCNNNNNNNNGATCGTCGGACTGTAGAACTCTGAACCCCTATAGTGAGTCGTATTACCGGCCTCAATCGAA
	NlaIII_96-barcodes_73	TCGTCAGTNNNNNNNNGATCGTCGGACTGTAGAACTCTGAACCCCTATAGTGAGTCGTATTACCGGCCTCAATCGAA
	NlaIII_96-barcodes_74	TCGATGCANNNNNNNNGATCGTCGGACTGTAGAACTCTGAACCCCTATAGTGAGTCGTATTACCGGCCTCAATCGAA
	NlaIII_96-barcodes_75	TCGGACTGNNNNNNNNGATCGTCGGACTGTAGAACTCTGAACCCCTATAGTGAGTCGTATTACCGGCCTCAATCGAA
	NlaIII_96-barcodes_76	TCGCGTACNNNNNNNNGATCGTCGGACTGTAGAACTCTGAACCCCTATAGTGAGTCGTATTACCGGCCTCAATCGAA
	NlaIII_96-barcodes_77	GATTCAGTNNNNNNNNGATCGTCGGACTGTAGAACTCTGAACCCCTATAGTGAGTCGTATTACCGGCCTCAATCGAA
	NlaIII_96-barcodes_78	GATATGCANNNNNNNNGATCGTCGGACTGTAGAACTCTGAACCCCTATAGTGAGTCGTATTACCGGCCTCAATCGAA
	NlaIII_96-barcodes_79	GATGACTGNNNNNNNNGATCGTCGGACTGTAGAACTCTGAACCCCTATAGTGAGTCGTATTACCGGCCTCAATCGAA
	NlaIII_96-barcodes_80	GATCGTACNNNNNNNNGATCGTCGGACTGTAGAACTCTGAACCCCTATAGTGAGTCGTATTACCGGCCTCAATCGAA
	NlaIII_96-barcodes_81	CGATCAGTNNNNNNNNGATCGTCGGACTGTAGAACTCTGAACCCCTATAGTGAGTCGTATTACCGGCCTCAATCGAA
	NlaIII_96-barcodes_82	CGAATGCANNNNNNNNGATCGTCGGACTGTAGAACTCTGAACCCCTATAGTGAGTCGTATTACCGGCCTCAATCGAA
	NlaIII_96-barcodes_83	CGAGACTGNNNNNNNNGATCGTCGGACTGTAGAACTCTGAACCCCTATAGTGAGTCGTATTACCGGCCTCAATCGAA
	NlaIII_96-barcodes_84	CGACGTACNNNNNNNNGATCGTCGGACTGTAGAACTCTGAACCCCTATAGTGAGTCGTATTACCGGCCTCAATCGAA
	NlaIII_96-barcodes_85	ATCTCAGTNNNNNNNNGATCGTCGGACTGTAGAACTCTGAACCCCTATAGTGAGTCGTATTACCGGCCTCAATCGAA
	NlaIII_96-barcodes_86	ATCATGCANNNNNNNNGATCGTCGGACTGTAGAACTCTGAACCCCTATAGTGAGTCGTATTACCGGCCTCAATCGAA
	NlaIII_96-barcodes_87	ATCGACTGNNNNNNNNGATCGTCGGACTGTAGAACTCTGAACCCCTATAGTGAGTCGTATTACCGGCCTCAATCGAA
	NlaIII_96-barcodes_88	ATCCGTACNNNNNNNNGATCGTCGGACTGTAGAACTCTGAACCCCTATAGTGAGTCGTATTACCGGCCTCAATCGAA
	NlaIII_96-barcodes_89	TCGGTACANNNNNNNNGATCGTCGGACTGTAGAACTCTGAACCCCTATAGTGAGTCGTATTACCGGCCTCAATCGAA
	NlaIII_96-barcodes_90	TCGCAGTGNNNNNNNNGATCGTCGGACTGTAGAACTCTGAACCCCTATAGTGAGTCGTATTACCGGCCTCAATCGAA
	NlaIII_96-barcodes_91	TCGTGCACNNNNNNNNGATCGTCGGACTGTAGAACTCTGAACCCCTATAGTGAGTCGTATTACCGGCCTCAATCGAA
	NlaIII_96-barcodes_92	TCGACTGTNNNNNNNNGATCGTCGGACTGTAGAACTCTGAACCCCTATAGTGAGTCGTATTACCGGCCTCAATCGAA
	NlaIII_96-barcodes_93	GATGTACANNNNNNNNGATCGTCGGACTGTAGAACTCTGAACCCCTATAGTGAGTCGTATTACCGGCCTCAATCGAA
	NlaIII_96-barcodes_94	GATCAGTGNNNNNNNNGATCGTCGGACTGTAGAACTCTGAACCCCTATAGTGAGTCGTATTACCGGCCTCAATCGAA
	NlaIII_96-barcodes_95	GATTGCACNNNNNNNNGATCGTCGGACTGTAGAACTCTGAACCCCTATAGTGAGTCGTATTACCGGCCTCAATCGAA
	NlaIII_96-barcodes_96	GATACTGTNNNNNNNNGATCGTCGGACTGTAGAACTCTGAACCCCTATAGTGAGTCGTATTACCGGCCTCAATCGAA

## Sheet: NlaIII_Rev_96-barcodes
Supplementary Table 3. List of oligonucleotides that can be used to prepare COVseq adapters.
	Adapter ID	Sequence (5'->3')
	NlaIII_96-barcodes_1	CGATTGAGGCCGGTAATACGACTCACTATAGGGGTTCAGAGTTCTACAGTCCGACGATCNNNNNNNNCATCACGCCATG
	NlaIII_96-barcodes_2	CGATTGAGGCCGGTAATACGACTCACTATAGGGGTTCAGAGTTCTACAGTCCGACGATCNNNNNNNNGTCGTCGCCATG
	NlaIII_96-barcodes_3	CGATTGAGGCCGGTAATACGACTCACTATAGGGGTTCAGAGTTCTACAGTCCGACGATCNNNNNNNNACGACCGCCATG
	NlaIII_96-barcodes_4	CGATTGAGGCCGGTAATACGACTCACTATAGGGGTTCAGAGTTCTACAGTCCGACGATCNNNNNNNNTGATGCGCCATG
	NlaIII_96-barcodes_5	CGATTGAGGCCGGTAATACGACTCACTATAGGGGTTCAGAGTTCTACAGTCCGACGATCNNNNNNNNCATCAATCCATG
	NlaIII_96-barcodes_6	CGATTGAGGCCGGTAATACGACTCACTATAGGGGTTCAGAGTTCTACAGTCCGACGATCNNNNNNNNGTCGTATCCATG
	NlaIII_96-barcodes_7	CGATTGAGGCCGGTAATACGACTCACTATAGGGGTTCAGAGTTCTACAGTCCGACGATCNNNNNNNNACGACATCCATG
	NlaIII_96-barcodes_8	CGATTGAGGCCGGTAATACGACTCACTATAGGGGTTCAGAGTTCTACAGTCCGACGATCNNNNNNNNTGATGATCCATG
	NlaIII_96-barcodes_9	CGATTGAGGCCGGTAATACGACTCACTATAGGGGTTCAGAGTTCTACAGTCCGACGATCNNNNNNNNCATCATCCCATG
	NlaIII_96-barcodes_10	CGATTGAGGCCGGTAATACGACTCACTATAGGGGTTCAGAGTTCTACAGTCCGACGATCNNNNNNNNGTCGTTCCCATG
	NlaIII_96-barcodes_11	CGATTGAGGCCGGTAATACGACTCACTATAGGGGTTCAGAGTTCTACAGTCCGACGATCNNNNNNNNACGACTCCCATG
	NlaIII_96-barcodes_12	CGATTGAGGCCGGTAATACGACTCACTATAGGGGTTCAGAGTTCTACAGTCCGACGATCNNNNNNNNTGATGTCCCATG
	NlaIII_96-barcodes_13	CGATTGAGGCCGGTAATACGACTCACTATAGGGGTTCAGAGTTCTACAGTCCGACGATCNNNNNNNNCATCAGAACATG
	NlaIII_96-barcodes_14	CGATTGAGGCCGGTAATACGACTCACTATAGGGGTTCAGAGTTCTACAGTCCGACGATCNNNNNNNNGTCGTGAACATG
	NlaIII_96-barcodes_15	CGATTGAGGCCGGTAATACGACTCACTATAGGGGTTCAGAGTTCTACAGTCCGACGATCNNNNNNNNACGACGAACATG
	NlaIII_96-barcodes_16	CGATTGAGGCCGGTAATACGACTCACTATAGGGGTTCAGAGTTCTACAGTCCGACGATCNNNNNNNNTGATGGAACATG
	NlaIII_96-barcodes_17	CGATTGAGGCCGGTAATACGACTCACTATAGGGGTTCAGAGTTCTACAGTCCGACGATCNNNNNNNNTCACACGCCATG
	NlaIII_96-barcodes_18	CGATTGAGGCCGGTAATACGACTCACTATAGGGGTTCAGAGTTCTACAGTCCGACGATCNNNNNNNNCGTGTCGCCATG
	NlaIII_96-barcodes_19	CGATTGAGGCCGGTAATACGACTCACTATAGGGGTTCAGAGTTCTACAGTCCGACGATCNNNNNNNNGACACCGCCATG
	NlaIII_96-barcodes_20	CGATTGAGGCCGGTAATACGACTCACTATAGGGGTTCAGAGTTCTACAGTCCGACGATCNNNNNNNNATGTGCGCCATG
	NlaIII_96-barcodes_21	CGATTGAGGCCGGTAATACGACTCACTATAGGGGTTCAGAGTTCTACAGTCCGACGATCNNNNNNNNTCACATCACATG
	NlaIII_96-barcodes_22	CGATTGAGGCCGGTAATACGACTCACTATAGGGGTTCAGAGTTCTACAGTCCGACGATCNNNNNNNNCGTGTTCACATG
	NlaIII_96-barcodes_23	CGATTGAGGCCGGTAATACGACTCACTATAGGGGTTCAGAGTTCTACAGTCCGACGATCNNNNNNNNGACACTCACATG
	NlaIII_96-barcodes_24	CGATTGAGGCCGGTAATACGACTCACTATAGGGGTTCAGAGTTCTACAGTCCGACGATCNNNNNNNNATGTGTCACATG
	NlaIII_96-barcodes_25	CGATTGAGGCCGGTAATACGACTCACTATAGGGGTTCAGAGTTCTACAGTCCGACGATCNNNNNNNNTCACAGAGCATG
	NlaIII_96-barcodes_26	CGATTGAGGCCGGTAATACGACTCACTATAGGGGTTCAGAGTTCTACAGTCCGACGATCNNNNNNNNCGTGTGAGCATG
	NlaIII_96-barcodes_27	CGATTGAGGCCGGTAATACGACTCACTATAGGGGTTCAGAGTTCTACAGTCCGACGATCNNNNNNNNGACACGAGCATG
	NlaIII_96-barcodes_28	CGATTGAGGCCGGTAATACGACTCACTATAGGGGTTCAGAGTTCTACAGTCCGACGATCNNNNNNNNATGTGGAGCATG
	NlaIII_96-barcodes_29	CGATTGAGGCCGGTAATACGACTCACTATAGGGGTTCAGAGTTCTACAGTCCGACGATCNNNNNNNNCTAACCGCCATG
	NlaIII_96-barcodes_30	CGATTGAGGCCGGTAATACGACTCACTATAGGGGTTCAGAGTTCTACAGTCCGACGATCNNNNNNNNGCTTGCGCCATG
	NlaIII_96-barcodes_31	CGATTGAGGCCGGTAATACGACTCACTATAGGGGTTCAGAGTTCTACAGTCCGACGATCNNNNNNNNAGCCACGCCATG
	NlaIII_96-barcodes_32	CGATTGAGGCCGGTAATACGACTCACTATAGGGGTTCAGAGTTCTACAGTCCGACGATCNNNNNNNNTAGGTCGCCATG
	NlaIII_96-barcodes_33	CGATTGAGGCCGGTAATACGACTCACTATAGGGGTTCAGAGTTCTACAGTCCGACGATCNNNNNNNNCTAACTCACATG
	NlaIII_96-barcodes_34	CGATTGAGGCCGGTAATACGACTCACTATAGGGGTTCAGAGTTCTACAGTCCGACGATCNNNNNNNNGCTTGTCACATG
	NlaIII_96-barcodes_35	CGATTGAGGCCGGTAATACGACTCACTATAGGGGTTCAGAGTTCTACAGTCCGACGATCNNNNNNNNAGCCATCACATG
	NlaIII_96-barcodes_36	CGATTGAGGCCGGTAATACGACTCACTATAGGGGTTCAGAGTTCTACAGTCCGACGATCNNNNNNNNTAGGTTCACATG
	NlaIII_96-barcodes_37	CGATTGAGGCCGGTAATACGACTCACTATAGGGGTTCAGAGTTCTACAGTCCGACGATCNNNNNNNNCTAACGAGCATG
	NlaIII_96-barcodes_38	CGATTGAGGCCGGTAATACGACTCACTATAGGGGTTCAGAGTTCTACAGTCCGACGATCNNNNNNNNGCTTGGAGCATG
	NlaIII_96-barcodes_39	CGATTGAGGCCGGTAATACGACTCACTATAGGGGTTCAGAGTTCTACAGTCCGACGATCNNNNNNNNAGCCAGAGCATG
	NlaIII_96-barcodes_40	CGATTGAGGCCGGTAATACGACTCACTATAGGGGTTCAGAGTTCTACAGTCCGACGATCNNNNNNNNTAGGTGAGCATG
	NlaIII_96-barcodes_41	CGATTGAGGCCGGTAATACGACTCACTATAGGGGTTCAGAGTTCTACAGTCCGACGATCNNNNNNNNGAATCCGACATG
	NlaIII_96-barcodes_42	CGATTGAGGCCGGTAATACGACTCACTATAGGGGTTCAGAGTTCTACAGTCCGACGATCNNNNNNNNATTCGCGACATG
	NlaIII_96-barcodes_43	CGATTGAGGCCGGTAATACGACTCACTATAGGGGTTCAGAGTTCTACAGTCCGACGATCNNNNNNNNTCCGACGACATG
	NlaIII_96-barcodes_44	CGATTGAGGCCGGTAATACGACTCACTATAGGGGTTCAGAGTTCTACAGTCCGACGATCNNNNNNNNCGGATCGACATG
	NlaIII_96-barcodes_45	CGATTGAGGCCGGTAATACGACTCACTATAGGGGTTCAGAGTTCTACAGTCCGACGATCNNNNNNNNGAATCATCCATG
	NlaIII_96-barcodes_46	CGATTGAGGCCGGTAATACGACTCACTATAGGGGTTCAGAGTTCTACAGTCCGACGATCNNNNNNNNATTCGATCCATG
	NlaIII_96-barcodes_47	CGATTGAGGCCGGTAATACGACTCACTATAGGGGTTCAGAGTTCTACAGTCCGACGATCNNNNNNNNTCCGAATCCATG
	NlaIII_96-barcodes_48	CGATTGAGGCCGGTAATACGACTCACTATAGGGGTTCAGAGTTCTACAGTCCGACGATCNNNNNNNNCGGATATCCATG
	NlaIII_96-barcodes_49	CGATTGAGGCCGGTAATACGACTCACTATAGGGGTTCAGAGTTCTACAGTCCGACGATCNNNNNNNNGAATCTCGCATG
	NlaIII_96-barcodes_50	CGATTGAGGCCGGTAATACGACTCACTATAGGGGTTCAGAGTTCTACAGTCCGACGATCNNNNNNNNATTCGTCGCATG
	NlaIII_96-barcodes_51	CGATTGAGGCCGGTAATACGACTCACTATAGGGGTTCAGAGTTCTACAGTCCGACGATCNNNNNNNNTCCGATCGCATG
	NlaIII_96-barcodes_52	CGATTGAGGCCGGTAATACGACTCACTATAGGGGTTCAGAGTTCTACAGTCCGACGATCNNNNNNNNCGGATTCGCATG
	NlaIII_96-barcodes_53	CGATTGAGGCCGGTAATACGACTCACTATAGGGGTTCAGAGTTCTACAGTCCGACGATCNNNNNNNNGAATCGATCATG
	NlaIII_96-barcodes_54	CGATTGAGGCCGGTAATACGACTCACTATAGGGGTTCAGAGTTCTACAGTCCGACGATCNNNNNNNNATTCGGATCATG
	NlaIII_96-barcodes_55	CGATTGAGGCCGGTAATACGACTCACTATAGGGGTTCAGAGTTCTACAGTCCGACGATCNNNNNNNNTCCGAGATCATG
	NlaIII_96-barcodes_56	CGATTGAGGCCGGTAATACGACTCACTATAGGGGTTCAGAGTTCTACAGTCCGACGATCNNNNNNNNCGGATGATCATG
	NlaIII_96-barcodes_57	CGATTGAGGCCGGTAATACGACTCACTATAGGGGTTCAGAGTTCTACAGTCCGACGATCNNNNNNNNAGCGTCGACATG
	NlaIII_96-barcodes_58	CGATTGAGGCCGGTAATACGACTCACTATAGGGGTTCAGAGTTCTACAGTCCGACGATCNNNNNNNNTAGACCGACATG
	NlaIII_96-barcodes_59	CGATTGAGGCCGGTAATACGACTCACTATAGGGGTTCAGAGTTCTACAGTCCGACGATCNNNNNNNNCTATGCGACATG
	NlaIII_96-barcodes_60	CGATTGAGGCCGGTAATACGACTCACTATAGGGGTTCAGAGTTCTACAGTCCGACGATCNNNNNNNNGCTCACGACATG
	NlaIII_96-barcodes_61	CGATTGAGGCCGGTAATACGACTCACTATAGGGGTTCAGAGTTCTACAGTCCGACGATCNNNNNNNNAGCGTATCCATG
	NlaIII_96-barcodes_62	CGATTGAGGCCGGTAATACGACTCACTATAGGGGTTCAGAGTTCTACAGTCCGACGATCNNNNNNNNTAGACATCCATG
	NlaIII_96-barcodes_63	CGATTGAGGCCGGTAATACGACTCACTATAGGGGTTCAGAGTTCTACAGTCCGACGATCNNNNNNNNCTATGATCCATG
	NlaIII_96-barcodes_64	CGATTGAGGCCGGTAATACGACTCACTATAGGGGTTCAGAGTTCTACAGTCCGACGATCNNNNNNNNGCTCAATCCATG
	NlaIII_96-barcodes_65	CGATTGAGGCCGGTAATACGACTCACTATAGGGGTTCAGAGTTCTACAGTCCGACGATCNNNNNNNNAGCGTTCGCATG
	NlaIII_96-barcodes_66	CGATTGAGGCCGGTAATACGACTCACTATAGGGGTTCAGAGTTCTACAGTCCGACGATCNNNNNNNNTAGACTCGCATG
	NlaIII_96-barcodes_67	CGATTGAGGCCGGTAATACGACTCACTATAGGGGTTCAGAGTTCTACAGTCCGACGATCNNNNNNNNCTATGTCGCATG
	NlaIII_96-barcodes_68	CGATTGAGGCCGGTAATACGACTCACTATAGGGGTTCAGAGTTCTACAGTCCGACGATCNNNNNNNNGCTCATCGCATG
	NlaIII_96-barcodes_69	CGATTGAGGCCGGTAATACGACTCACTATAGGGGTTCAGAGTTCTACAGTCCGACGATCNNNNNNNNAGCGTGATCATG
	NlaIII_96-barcodes_70	CGATTGAGGCCGGTAATACGACTCACTATAGGGGTTCAGAGTTCTACAGTCCGACGATCNNNNNNNNTAGACGATCATG
	NlaIII_96-barcodes_71	CGATTGAGGCCGGTAATACGACTCACTATAGGGGTTCAGAGTTCTACAGTCCGACGATCNNNNNNNNCTATGGATCATG
	NlaIII_96-barcodes_72	CGATTGAGGCCGGTAATACGACTCACTATAGGGGTTCAGAGTTCTACAGTCCGACGATCNNNNNNNNGCTCAGATCATG
	NlaIII_96-barcodes_73	CGATTGAGGCCGGTAATACGACTCACTATAGGGGTTCAGAGTTCTACAGTCCGACGATCNNNNNNNNACTGACGACATG
	NlaIII_96-barcodes_74	CGATTGAGGCCGGTAATACGACTCACTATAGGGGTTCAGAGTTCTACAGTCCGACGATCNNNNNNNNTGCATCGACATG
	NlaIII_96-barcodes_75	CGATTGAGGCCGGTAATACGACTCACTATAGGGGTTCAGAGTTCTACAGTCCGACGATCNNNNNNNNCAGTCCGACATG
	NlaIII_96-barcodes_76	CGATTGAGGCCGGTAATACGACTCACTATAGGGGTTCAGAGTTCTACAGTCCGACGATCNNNNNNNNGTACGCGACATG
	NlaIII_96-barcodes_77	CGATTGAGGCCGGTAATACGACTCACTATAGGGGTTCAGAGTTCTACAGTCCGACGATCNNNNNNNNACTGAATCCATG
	NlaIII_96-barcodes_78	CGATTGAGGCCGGTAATACGACTCACTATAGGGGTTCAGAGTTCTACAGTCCGACGATCNNNNNNNNTGCATATCCATG
	NlaIII_96-barcodes_79	CGATTGAGGCCGGTAATACGACTCACTATAGGGGTTCAGAGTTCTACAGTCCGACGATCNNNNNNNNCAGTCATCCATG
	NlaIII_96-barcodes_80	CGATTGAGGCCGGTAATACGACTCACTATAGGGGTTCAGAGTTCTACAGTCCGACGATCNNNNNNNNGTACGATCCATG
	NlaIII_96-barcodes_81	CGATTGAGGCCGGTAATACGACTCACTATAGGGGTTCAGAGTTCTACAGTCCGACGATCNNNNNNNNACTGATCGCATG
	NlaIII_96-barcodes_82	CGATTGAGGCCGGTAATACGACTCACTATAGGGGTTCAGAGTTCTACAGTCCGACGATCNNNNNNNNTGCATTCGCATG
	NlaIII_96-barcodes_83	CGATTGAGGCCGGTAATACGACTCACTATAGGGGTTCAGAGTTCTACAGTCCGACGATCNNNNNNNNCAGTCTCGCATG
	NlaIII_96-barcodes_84	CGATTGAGGCCGGTAATACGACTCACTATAGGGGTTCAGAGTTCTACAGTCCGACGATCNNNNNNNNGTACGTCGCATG
	NlaIII_96-barcodes_85	CGATTGAGGCCGGTAATACGACTCACTATAGGGGTTCAGAGTTCTACAGTCCGACGATCNNNNNNNNACTGAGATCATG
	NlaIII_96-barcodes_86	CGATTGAGGCCGGTAATACGACTCACTATAGGGGTTCAGAGTTCTACAGTCCGACGATCNNNNNNNNTGCATGATCATG
	NlaIII_96-barcodes_87	CGATTGAGGCCGGTAATACGACTCACTATAGGGGTTCAGAGTTCTACAGTCCGACGATCNNNNNNNNCAGTCGATCATG
	NlaIII_96-barcodes_88	CGATTGAGGCCGGTAATACGACTCACTATAGGGGTTCAGAGTTCTACAGTCCGACGATCNNNNNNNNGTACGGATCATG
	NlaIII_96-barcodes_89	CGATTGAGGCCGGTAATACGACTCACTATAGGGGTTCAGAGTTCTACAGTCCGACGATCNNNNNNNNTGTACCGACATG
	NlaIII_96-barcodes_90	CGATTGAGGCCGGTAATACGACTCACTATAGGGGTTCAGAGTTCTACAGTCCGACGATCNNNNNNNNCACTGCGACATG
	NlaIII_96-barcodes_91	CGATTGAGGCCGGTAATACGACTCACTATAGGGGTTCAGAGTTCTACAGTCCGACGATCNNNNNNNNGTGCACGACATG
	NlaIII_96-barcodes_92	CGATTGAGGCCGGTAATACGACTCACTATAGGGGTTCAGAGTTCTACAGTCCGACGATCNNNNNNNNACAGTCGACATG
	NlaIII_96-barcodes_93	CGATTGAGGCCGGTAATACGACTCACTATAGGGGTTCAGAGTTCTACAGTCCGACGATCNNNNNNNNTGTACATCCATG
	NlaIII_96-barcodes_94	CGATTGAGGCCGGTAATACGACTCACTATAGGGGTTCAGAGTTCTACAGTCCGACGATCNNNNNNNNCACTGATCCATG
	NlaIII_96-barcodes_95	CGATTGAGGCCGGTAATACGACTCACTATAGGGGTTCAGAGTTCTACAGTCCGACGATCNNNNNNNNGTGCAATCCATG
	NlaIII_96-barcodes_96	CGATTGAGGCCGGTAATACGACTCACTATAGGGGTTCAGAGTTCTACAGTCCGACGATCNNNNNNNNACAGTATCCATG

## Sheet: MseI_For_384-barcodes
Supplementary Table 3. List of oligonucleotides that can be used to prepare COVseq adapters.
	Adapter ID	Sequence (5'->3')
	MseI_384-barcodes_1	TAACAGAAGAGTTCNNNNNNNNGATCGTCGGACTGTAGAACTCTGAACCCCTATAGTGAGTCGTATTACCGGCCTCAATCGAA
	MseI_384-barcodes_2	TAAATCATGTTCGANNNNNNNNGATCGTCGGACTGTAGAACTCTGAACCCCTATAGTGAGTCGTATTACCGGCCTCAATCGAA
	MseI_384-barcodes_3	TAACGAGCTATGCCNNNNNNNNGATCGTCGGACTGTAGAACTCTGAACCCCTATAGTGAGTCGTATTACCGGCCTCAATCGAA
	MseI_384-barcodes_4	TAATCGCGGCTGTTNNNNNNNNGATCGTCGGACTGTAGAACTCTGAACCCCTATAGTGAGTCGTATTACCGGCCTCAATCGAA
	MseI_384-barcodes_5	TAAACACACAGAGGNNNNNNNNGATCGTCGGACTGTAGAACTCTGAACCCCTATAGTGAGTCGTATTACCGGCCTCAATCGAA
	MseI_384-barcodes_6	TAATGCCGTTGGCTNNNNNNNNGATCGTCGGACTGTAGAACTCTGAACCCCTATAGTGAGTCGTATTACCGGCCTCAATCGAA
	MseI_384-barcodes_7	TAACGCGAAGTCATNNNNNNNNGATCGTCGGACTGTAGAACTCTGAACCCCTATAGTGAGTCGTATTACCGGCCTCAATCGAA
	MseI_384-barcodes_8	TAATGACGACCGAGNNNNNNNNGATCGTCGGACTGTAGAACTCTGAACCCCTATAGTGAGTCGTATTACCGGCCTCAATCGAA
	MseI_384-barcodes_9	TAACCACAATTACCNNNNNNNNGATCGTCGGACTGTAGAACTCTGAACCCCTATAGTGAGTCGTATTACCGGCCTCAATCGAA
	MseI_384-barcodes_10	TAAACTTGGACCGGNNNNNNNNGATCGTCGGACTGTAGAACTCTGAACCCCTATAGTGAGTCGTATTACCGGCCTCAATCGAA
	MseI_384-barcodes_11	TAAGTCGTAGATCANNNNNNNNGATCGTCGGACTGTAGAACTCTGAACCCCTATAGTGAGTCGTATTACCGGCCTCAATCGAA
	MseI_384-barcodes_12	TAAGGTCTGTGAGGNNNNNNNNGATCGTCGGACTGTAGAACTCTGAACCCCTATAGTGAGTCGTATTACCGGCCTCAATCGAA
	MseI_384-barcodes_13	TAAGCATCTAGCTANNNNNNNNGATCGTCGGACTGTAGAACTCTGAACCCCTATAGTGAGTCGTATTACCGGCCTCAATCGAA
	MseI_384-barcodes_14	TAACGTACACTCTGNNNNNNNNGATCGTCGGACTGTAGAACTCTGAACCCCTATAGTGAGTCGTATTACCGGCCTCAATCGAA
	MseI_384-barcodes_15	TAAGGCACAGTATCNNNNNNNNGATCGTCGGACTGTAGAACTCTGAACCCCTATAGTGAGTCGTATTACCGGCCTCAATCGAA
	MseI_384-barcodes_16	TAATAGACGTGAACNNNNNNNNGATCGTCGGACTGTAGAACTCTGAACCCCTATAGTGAGTCGTATTACCGGCCTCAATCGAA
	MseI_384-barcodes_17	TAACCAATGGTCAANNNNNNNNGATCGTCGGACTGTAGAACTCTGAACCCCTATAGTGAGTCGTATTACCGGCCTCAATCGAA
	MseI_384-barcodes_18	TAATCGTCATGCGGNNNNNNNNGATCGTCGGACTGTAGAACTCTGAACCCCTATAGTGAGTCGTATTACCGGCCTCAATCGAA
	MseI_384-barcodes_19	TAAATGTGAAGCGTNNNNNNNNGATCGTCGGACTGTAGAACTCTGAACCCCTATAGTGAGTCGTATTACCGGCCTCAATCGAA
	MseI_384-barcodes_20	TAAGGCTGAGAAGGNNNNNNNNGATCGTCGGACTGTAGAACTCTGAACCCCTATAGTGAGTCGTATTACCGGCCTCAATCGAA
	MseI_384-barcodes_21	TAAGTACCGAGAACNNNNNNNNGATCGTCGGACTGTAGAACTCTGAACCCCTATAGTGAGTCGTATTACCGGCCTCAATCGAA
	MseI_384-barcodes_22	TAACTTCAGCAGTTNNNNNNNNGATCGTCGGACTGTAGAACTCTGAACCCCTATAGTGAGTCGTATTACCGGCCTCAATCGAA
	MseI_384-barcodes_23	TAAATTGGTGCTCCNNNNNNNNGATCGTCGGACTGTAGAACTCTGAACCCCTATAGTGAGTCGTATTACCGGCCTCAATCGAA
	MseI_384-barcodes_24	TAACTTGATCGTGTNNNNNNNNGATCGTCGGACTGTAGAACTCTGAACCCCTATAGTGAGTCGTATTACCGGCCTCAATCGAA
	MseI_384-barcodes_25	TAACATGAGGCGCANNNNNNNNGATCGTCGGACTGTAGAACTCTGAACCCCTATAGTGAGTCGTATTACCGGCCTCAATCGAA
	MseI_384-barcodes_26	TAATGCTATGGCAGNNNNNNNNGATCGTCGGACTGTAGAACTCTGAACCCCTATAGTGAGTCGTATTACCGGCCTCAATCGAA
	MseI_384-barcodes_27	TAAAGCTATTCTGANNNNNNNNGATCGTCGGACTGTAGAACTCTGAACCCCTATAGTGAGTCGTATTACCGGCCTCAATCGAA
	MseI_384-barcodes_28	TAAGATTAACACGTNNNNNNNNGATCGTCGGACTGTAGAACTCTGAACCCCTATAGTGAGTCGTATTACCGGCCTCAATCGAA
	MseI_384-barcodes_29	TAATTCAGTCCAGCNNNNNNNNGATCGTCGGACTGTAGAACTCTGAACCCCTATAGTGAGTCGTATTACCGGCCTCAATCGAA
	MseI_384-barcodes_30	TAAAATCTCTCTACNNNNNNNNGATCGTCGGACTGTAGAACTCTGAACCCCTATAGTGAGTCGTATTACCGGCCTCAATCGAA
	MseI_384-barcodes_31	TAACACATGCGGTANNNNNNNNGATCGTCGGACTGTAGAACTCTGAACCCCTATAGTGAGTCGTATTACCGGCCTCAATCGAA
	MseI_384-barcodes_32	TAAGGAGGCCATCANNNNNNNNGATCGTCGGACTGTAGAACTCTGAACCCCTATAGTGAGTCGTATTACCGGCCTCAATCGAA
	MseI_384-barcodes_33	TAATGCGTGAGGCANNNNNNNNGATCGTCGGACTGTAGAACTCTGAACCCCTATAGTGAGTCGTATTACCGGCCTCAATCGAA
	MseI_384-barcodes_34	TAACTAAGCGAATANNNNNNNNGATCGTCGGACTGTAGAACTCTGAACCCCTATAGTGAGTCGTATTACCGGCCTCAATCGAA
	MseI_384-barcodes_35	TAACAATGTCGACGNNNNNNNNGATCGTCGGACTGTAGAACTCTGAACCCCTATAGTGAGTCGTATTACCGGCCTCAATCGAA
	MseI_384-barcodes_36	TAATCTCGTTACATNNNNNNNNGATCGTCGGACTGTAGAACTCTGAACCCCTATAGTGAGTCGTATTACCGGCCTCAATCGAA
	MseI_384-barcodes_37	TAAAATATAGACCGNNNNNNNNGATCGTCGGACTGTAGAACTCTGAACCCCTATAGTGAGTCGTATTACCGGCCTCAATCGAA
	MseI_384-barcodes_38	TAACCTATCATGCTNNNNNNNNGATCGTCGGACTGTAGAACTCTGAACCCCTATAGTGAGTCGTATTACCGGCCTCAATCGAA
	MseI_384-barcodes_39	TAACACGACAACTCNNNNNNNNGATCGTCGGACTGTAGAACTCTGAACCCCTATAGTGAGTCGTATTACCGGCCTCAATCGAA
	MseI_384-barcodes_40	TAACCTGCAGATGANNNNNNNNGATCGTCGGACTGTAGAACTCTGAACCCCTATAGTGAGTCGTATTACCGGCCTCAATCGAA
	MseI_384-barcodes_41	TAAAGAGCTGCATGNNNNNNNNGATCGTCGGACTGTAGAACTCTGAACCCCTATAGTGAGTCGTATTACCGGCCTCAATCGAA
	MseI_384-barcodes_42	TAATGACCTTCTCANNNNNNNNGATCGTCGGACTGTAGAACTCTGAACCCCTATAGTGAGTCGTATTACCGGCCTCAATCGAA
	MseI_384-barcodes_43	TAAGAATGGCTAACNNNNNNNNGATCGTCGGACTGTAGAACTCTGAACCCCTATAGTGAGTCGTATTACCGGCCTCAATCGAA
	MseI_384-barcodes_44	TAAACCTTGTCGACNNNNNNNNGATCGTCGGACTGTAGAACTCTGAACCCCTATAGTGAGTCGTATTACCGGCCTCAATCGAA
	MseI_384-barcodes_45	TAATTGATGCCGTCNNNNNNNNGATCGTCGGACTGTAGAACTCTGAACCCCTATAGTGAGTCGTATTACCGGCCTCAATCGAA
	MseI_384-barcodes_46	TAACTTGACTGGTANNNNNNNNGATCGTCGGACTGTAGAACTCTGAACCCCTATAGTGAGTCGTATTACCGGCCTCAATCGAA
	MseI_384-barcodes_47	TAAACTCAGTGCGANNNNNNNNGATCGTCGGACTGTAGAACTCTGAACCCCTATAGTGAGTCGTATTACCGGCCTCAATCGAA
	MseI_384-barcodes_48	TAATAAGGCCGGATNNNNNNNNGATCGTCGGACTGTAGAACTCTGAACCCCTATAGTGAGTCGTATTACCGGCCTCAATCGAA
	MseI_384-barcodes_49	TAACGAATCCGCTTNNNNNNNNGATCGTCGGACTGTAGAACTCTGAACCCCTATAGTGAGTCGTATTACCGGCCTCAATCGAA
	MseI_384-barcodes_50	TAAATCGGATCAGGNNNNNNNNGATCGTCGGACTGTAGAACTCTGAACCCCTATAGTGAGTCGTATTACCGGCCTCAATCGAA
	MseI_384-barcodes_51	TAAGTCCACGTAGCNNNNNNNNGATCGTCGGACTGTAGAACTCTGAACCCCTATAGTGAGTCGTATTACCGGCCTCAATCGAA
	MseI_384-barcodes_52	TAATACCATAATGGNNNNNNNNGATCGTCGGACTGTAGAACTCTGAACCCCTATAGTGAGTCGTATTACCGGCCTCAATCGAA
	MseI_384-barcodes_53	TAATATGTGTTCTCNNNNNNNNGATCGTCGGACTGTAGAACTCTGAACCCCTATAGTGAGTCGTATTACCGGCCTCAATCGAA
	MseI_384-barcodes_54	TAAATGTTGTGTGGNNNNNNNNGATCGTCGGACTGTAGAACTCTGAACCCCTATAGTGAGTCGTATTACCGGCCTCAATCGAA
	MseI_384-barcodes_55	TAAAGGAGCCTAAGNNNNNNNNGATCGTCGGACTGTAGAACTCTGAACCCCTATAGTGAGTCGTATTACCGGCCTCAATCGAA
	MseI_384-barcodes_56	TAAGCGACACGAGANNNNNNNNGATCGTCGGACTGTAGAACTCTGAACCCCTATAGTGAGTCGTATTACCGGCCTCAATCGAA
	MseI_384-barcodes_57	TAACTACTACAGAANNNNNNNNGATCGTCGGACTGTAGAACTCTGAACCCCTATAGTGAGTCGTATTACCGGCCTCAATCGAA
	MseI_384-barcodes_58	TAACCGAGGTGACTNNNNNNNNGATCGTCGGACTGTAGAACTCTGAACCCCTATAGTGAGTCGTATTACCGGCCTCAATCGAA
	MseI_384-barcodes_59	TAAAGAGGACGACTNNNNNNNNGATCGTCGGACTGTAGAACTCTGAACCCCTATAGTGAGTCGTATTACCGGCCTCAATCGAA
	MseI_384-barcodes_60	TAAAGAGGCGTGAANNNNNNNNGATCGTCGGACTGTAGAACTCTGAACCCCTATAGTGAGTCGTATTACCGGCCTCAATCGAA
	MseI_384-barcodes_61	TAAAGTGTGTAGCCNNNNNNNNGATCGTCGGACTGTAGAACTCTGAACCCCTATAGTGAGTCGTATTACCGGCCTCAATCGAA
	MseI_384-barcodes_62	TAAAAGGAAGTACCNNNNNNNNGATCGTCGGACTGTAGAACTCTGAACCCCTATAGTGAGTCGTATTACCGGCCTCAATCGAA
	MseI_384-barcodes_63	TAAGCGCAGATTGTNNNNNNNNGATCGTCGGACTGTAGAACTCTGAACCCCTATAGTGAGTCGTATTACCGGCCTCAATCGAA
	MseI_384-barcodes_64	TAAGTAATCTACCANNNNNNNNGATCGTCGGACTGTAGAACTCTGAACCCCTATAGTGAGTCGTATTACCGGCCTCAATCGAA
	MseI_384-barcodes_65	TAAAAGGCGACTGCNNNNNNNNGATCGTCGGACTGTAGAACTCTGAACCCCTATAGTGAGTCGTATTACCGGCCTCAATCGAA
	MseI_384-barcodes_66	TAAGCTTAAGCTGCNNNNNNNNGATCGTCGGACTGTAGAACTCTGAACCCCTATAGTGAGTCGTATTACCGGCCTCAATCGAA
	MseI_384-barcodes_67	TAACTGATTCATGANNNNNNNNGATCGTCGGACTGTAGAACTCTGAACCCCTATAGTGAGTCGTATTACCGGCCTCAATCGAA
	MseI_384-barcodes_68	TAATGACAATTCGANNNNNNNNGATCGTCGGACTGTAGAACTCTGAACCCCTATAGTGAGTCGTATTACCGGCCTCAATCGAA
	MseI_384-barcodes_69	TAAGCAGCAGCAGTNNNNNNNNGATCGTCGGACTGTAGAACTCTGAACCCCTATAGTGAGTCGTATTACCGGCCTCAATCGAA
	MseI_384-barcodes_70	TAAATATGTCACTCNNNNNNNNGATCGTCGGACTGTAGAACTCTGAACCCCTATAGTGAGTCGTATTACCGGCCTCAATCGAA
	MseI_384-barcodes_71	TAACGGTCGGTATTNNNNNNNNGATCGTCGGACTGTAGAACTCTGAACCCCTATAGTGAGTCGTATTACCGGCCTCAATCGAA
	MseI_384-barcodes_72	TAATGTAGGCAGCGNNNNNNNNGATCGTCGGACTGTAGAACTCTGAACCCCTATAGTGAGTCGTATTACCGGCCTCAATCGAA
	MseI_384-barcodes_73	TAAAACGTCGAATGNNNNNNNNGATCGTCGGACTGTAGAACTCTGAACCCCTATAGTGAGTCGTATTACCGGCCTCAATCGAA
	MseI_384-barcodes_74	TAATACAGGTCCATNNNNNNNNGATCGTCGGACTGTAGAACTCTGAACCCCTATAGTGAGTCGTATTACCGGCCTCAATCGAA
	MseI_384-barcodes_75	TAATCGTGCTAGTANNNNNNNNGATCGTCGGACTGTAGAACTCTGAACCCCTATAGTGAGTCGTATTACCGGCCTCAATCGAA
	MseI_384-barcodes_76	TAAAATCGGATTGANNNNNNNNGATCGTCGGACTGTAGAACTCTGAACCCCTATAGTGAGTCGTATTACCGGCCTCAATCGAA
	MseI_384-barcodes_77	TAATATGACGCCGGNNNNNNNNGATCGTCGGACTGTAGAACTCTGAACCCCTATAGTGAGTCGTATTACCGGCCTCAATCGAA
	MseI_384-barcodes_78	TAAGGTGCAATCGTNNNNNNNNGATCGTCGGACTGTAGAACTCTGAACCCCTATAGTGAGTCGTATTACCGGCCTCAATCGAA
	MseI_384-barcodes_79	TAAGGATTCACAGTNNNNNNNNGATCGTCGGACTGTAGAACTCTGAACCCCTATAGTGAGTCGTATTACCGGCCTCAATCGAA
	MseI_384-barcodes_80	TAAGATCTGTACAANNNNNNNNGATCGTCGGACTGTAGAACTCTGAACCCCTATAGTGAGTCGTATTACCGGCCTCAATCGAA
	MseI_384-barcodes_81	TAAGATACTCAGTANNNNNNNNGATCGTCGGACTGTAGAACTCTGAACCCCTATAGTGAGTCGTATTACCGGCCTCAATCGAA
	MseI_384-barcodes_82	TAATGCAAGAACACNNNNNNNNGATCGTCGGACTGTAGAACTCTGAACCCCTATAGTGAGTCGTATTACCGGCCTCAATCGAA
	MseI_384-barcodes_83	TAACTCTCCGCTTCNNNNNNNNGATCGTCGGACTGTAGAACTCTGAACCCCTATAGTGAGTCGTATTACCGGCCTCAATCGAA
	MseI_384-barcodes_84	TAAACTCGCCTACCNNNNNNNNGATCGTCGGACTGTAGAACTCTGAACCCCTATAGTGAGTCGTATTACCGGCCTCAATCGAA
	MseI_384-barcodes_85	TAAGAGATTCTCTCNNNNNNNNGATCGTCGGACTGTAGAACTCTGAACCCCTATAGTGAGTCGTATTACCGGCCTCAATCGAA
	MseI_384-barcodes_86	TAAATCTTAGTGCTNNNNNNNNGATCGTCGGACTGTAGAACTCTGAACCCCTATAGTGAGTCGTATTACCGGCCTCAATCGAA
	MseI_384-barcodes_87	TAAGCCGGATAGCTNNNNNNNNGATCGTCGGACTGTAGAACTCTGAACCCCTATAGTGAGTCGTATTACCGGCCTCAATCGAA
	MseI_384-barcodes_88	TAACGCTAGAAGGANNNNNNNNGATCGTCGGACTGTAGAACTCTGAACCCCTATAGTGAGTCGTATTACCGGCCTCAATCGAA
	MseI_384-barcodes_89	TAAGTGTAGGCCACNNNNNNNNGATCGTCGGACTGTAGAACTCTGAACCCCTATAGTGAGTCGTATTACCGGCCTCAATCGAA
	MseI_384-barcodes_90	TAAGAGGTTCCGGTNNNNNNNNGATCGTCGGACTGTAGAACTCTGAACCCCTATAGTGAGTCGTATTACCGGCCTCAATCGAA
	MseI_384-barcodes_91	TAACCACTGTCGTTNNNNNNNNGATCGTCGGACTGTAGAACTCTGAACCCCTATAGTGAGTCGTATTACCGGCCTCAATCGAA
	MseI_384-barcodes_92	TAAACCTCAGGACGNNNNNNNNGATCGTCGGACTGTAGAACTCTGAACCCCTATAGTGAGTCGTATTACCGGCCTCAATCGAA
	MseI_384-barcodes_93	TAAATTGTCAGAGANNNNNNNNGATCGTCGGACTGTAGAACTCTGAACCCCTATAGTGAGTCGTATTACCGGCCTCAATCGAA
	MseI_384-barcodes_94	TAACCAACATTGATNNNNNNNNGATCGTCGGACTGTAGAACTCTGAACCCCTATAGTGAGTCGTATTACCGGCCTCAATCGAA
	MseI_384-barcodes_95	TAAAGGCTAGTCACNNNNNNNNGATCGTCGGACTGTAGAACTCTGAACCCCTATAGTGAGTCGTATTACCGGCCTCAATCGAA
	MseI_384-barcodes_96	TAAATCCTTAACCGNNNNNNNNGATCGTCGGACTGTAGAACTCTGAACCCCTATAGTGAGTCGTATTACCGGCCTCAATCGAA
	MseI_384-barcodes_97	TAACGTCGATTAGTNNNNNNNNGATCGTCGGACTGTAGAACTCTGAACCCCTATAGTGAGTCGTATTACCGGCCTCAATCGAA
	MseI_384-barcodes_98	TAAGGTAATGCTCTNNNNNNNNGATCGTCGGACTGTAGAACTCTGAACCCCTATAGTGAGTCGTATTACCGGCCTCAATCGAA
	MseI_384-barcodes_99	TAAGTTAACGCGTCNNNNNNNNGATCGTCGGACTGTAGAACTCTGAACCCCTATAGTGAGTCGTATTACCGGCCTCAATCGAA
	MseI_384-barcodes_100	TAATCGCCAGCTCTNNNNNNNNGATCGTCGGACTGTAGAACTCTGAACCCCTATAGTGAGTCGTATTACCGGCCTCAATCGAA
	MseI_384-barcodes_101	TAAGCCACCTCATTNNNNNNNNGATCGTCGGACTGTAGAACTCTGAACCCCTATAGTGAGTCGTATTACCGGCCTCAATCGAA
	MseI_384-barcodes_102	TAAAGATTGGTGTCNNNNNNNNGATCGTCGGACTGTAGAACTCTGAACCCCTATAGTGAGTCGTATTACCGGCCTCAATCGAA
	MseI_384-barcodes_103	TAAAGGTATTAGAGNNNNNNNNGATCGTCGGACTGTAGAACTCTGAACCCCTATAGTGAGTCGTATTACCGGCCTCAATCGAA
	MseI_384-barcodes_104	TAATTCTGCGTCGGNNNNNNNNGATCGTCGGACTGTAGAACTCTGAACCCCTATAGTGAGTCGTATTACCGGCCTCAATCGAA
	MseI_384-barcodes_105	TAACCTCTAACTATNNNNNNNNGATCGTCGGACTGTAGAACTCTGAACCCCTATAGTGAGTCGTATTACCGGCCTCAATCGAA
	MseI_384-barcodes_106	TAACGTAGCACGTGNNNNNNNNGATCGTCGGACTGTAGAACTCTGAACCCCTATAGTGAGTCGTATTACCGGCCTCAATCGAA
	MseI_384-barcodes_107	TAATGGTGCCAAGCNNNNNNNNGATCGTCGGACTGTAGAACTCTGAACCCCTATAGTGAGTCGTATTACCGGCCTCAATCGAA
	MseI_384-barcodes_108	TAATCTGTACGTAGNNNNNNNNGATCGTCGGACTGTAGAACTCTGAACCCCTATAGTGAGTCGTATTACCGGCCTCAATCGAA
	MseI_384-barcodes_109	TAAAGTTGTGCAGTNNNNNNNNGATCGTCGGACTGTAGAACTCTGAACCCCTATAGTGAGTCGTATTACCGGCCTCAATCGAA
	MseI_384-barcodes_110	TAACTCGGCATTATNNNNNNNNGATCGTCGGACTGTAGAACTCTGAACCCCTATAGTGAGTCGTATTACCGGCCTCAATCGAA
	MseI_384-barcodes_111	TAACATAGGTTCGGNNNNNNNNGATCGTCGGACTGTAGAACTCTGAACCCCTATAGTGAGTCGTATTACCGGCCTCAATCGAA
	MseI_384-barcodes_112	TAAACCATTGGTAANNNNNNNNGATCGTCGGACTGTAGAACTCTGAACCCCTATAGTGAGTCGTATTACCGGCCTCAATCGAA
	MseI_384-barcodes_113	TAAGGTTGTAATAGNNNNNNNNGATCGTCGGACTGTAGAACTCTGAACCCCTATAGTGAGTCGTATTACCGGCCTCAATCGAA
	MseI_384-barcodes_114	TAATGCTGGCGCTANNNNNNNNGATCGTCGGACTGTAGAACTCTGAACCCCTATAGTGAGTCGTATTACCGGCCTCAATCGAA
	MseI_384-barcodes_115	TAAGTGGTGCTACCNNNNNNNNGATCGTCGGACTGTAGAACTCTGAACCCCTATAGTGAGTCGTATTACCGGCCTCAATCGAA
	MseI_384-barcodes_116	TAAAACCTATGTGTNNNNNNNNGATCGTCGGACTGTAGAACTCTGAACCCCTATAGTGAGTCGTATTACCGGCCTCAATCGAA
	MseI_384-barcodes_117	TAACGAGAGTCCAANNNNNNNNGATCGTCGGACTGTAGAACTCTGAACCCCTATAGTGAGTCGTATTACCGGCCTCAATCGAA
	MseI_384-barcodes_118	TAATCATCGGTTGANNNNNNNNGATCGTCGGACTGTAGAACTCTGAACCCCTATAGTGAGTCGTATTACCGGCCTCAATCGAA
	MseI_384-barcodes_119	TAACAATTACCAGCNNNNNNNNGATCGTCGGACTGTAGAACTCTGAACCCCTATAGTGAGTCGTATTACCGGCCTCAATCGAA
	MseI_384-barcodes_120	TAAGAGACAACCACNNNNNNNNGATCGTCGGACTGTAGAACTCTGAACCCCTATAGTGAGTCGTATTACCGGCCTCAATCGAA
	MseI_384-barcodes_121	TAAGATTCTATGGCNNNNNNNNGATCGTCGGACTGTAGAACTCTGAACCCCTATAGTGAGTCGTATTACCGGCCTCAATCGAA
	MseI_384-barcodes_122	TAAATTCTGACGCANNNNNNNNGATCGTCGGACTGTAGAACTCTGAACCCCTATAGTGAGTCGTATTACCGGCCTCAATCGAA
	MseI_384-barcodes_123	TAACTGTCGGAGCANNNNNNNNGATCGTCGGACTGTAGAACTCTGAACCCCTATAGTGAGTCGTATTACCGGCCTCAATCGAA
	MseI_384-barcodes_124	TAAACTGTACTGTANNNNNNNNGATCGTCGGACTGTAGAACTCTGAACCCCTATAGTGAGTCGTATTACCGGCCTCAATCGAA
	MseI_384-barcodes_125	TAACTGGTGATGTANNNNNNNNGATCGTCGGACTGTAGAACTCTGAACCCCTATAGTGAGTCGTATTACCGGCCTCAATCGAA
	MseI_384-barcodes_126	TAAACACATGCACTNNNNNNNNGATCGTCGGACTGTAGAACTCTGAACCCCTATAGTGAGTCGTATTACCGGCCTCAATCGAA
	MseI_384-barcodes_127	TAACTCTGTCAGATNNNNNNNNGATCGTCGGACTGTAGAACTCTGAACCCCTATAGTGAGTCGTATTACCGGCCTCAATCGAA
	MseI_384-barcodes_128	TAAGTAGAACCGATNNNNNNNNGATCGTCGGACTGTAGAACTCTGAACCCCTATAGTGAGTCGTATTACCGGCCTCAATCGAA
	MseI_384-barcodes_129	TAAGGAATCCTGACNNNNNNNNGATCGTCGGACTGTAGAACTCTGAACCCCTATAGTGAGTCGTATTACCGGCCTCAATCGAA
	MseI_384-barcodes_130	TAAATCACCTGTTGNNNNNNNNGATCGTCGGACTGTAGAACTCTGAACCCCTATAGTGAGTCGTATTACCGGCCTCAATCGAA
	MseI_384-barcodes_131	TAACTGTACCTCGTNNNNNNNNGATCGTCGGACTGTAGAACTCTGAACCCCTATAGTGAGTCGTATTACCGGCCTCAATCGAA
	MseI_384-barcodes_132	TAATACGAGCTGCCNNNNNNNNGATCGTCGGACTGTAGAACTCTGAACCCCTATAGTGAGTCGTATTACCGGCCTCAATCGAA
	MseI_384-barcodes_133	TAACCAGGTACCTTNNNNNNNNGATCGTCGGACTGTAGAACTCTGAACCCCTATAGTGAGTCGTATTACCGGCCTCAATCGAA
	MseI_384-barcodes_134	TAATAATTCTGCGTNNNNNNNNGATCGTCGGACTGTAGAACTCTGAACCCCTATAGTGAGTCGTATTACCGGCCTCAATCGAA
	MseI_384-barcodes_135	TAAGTAGCATAGGCNNNNNNNNGATCGTCGGACTGTAGAACTCTGAACCCCTATAGTGAGTCGTATTACCGGCCTCAATCGAA
	MseI_384-barcodes_136	TAACGCCTTACATTNNNNNNNNGATCGTCGGACTGTAGAACTCTGAACCCCTATAGTGAGTCGTATTACCGGCCTCAATCGAA
	MseI_384-barcodes_137	TAAGTTCGATACCGNNNNNNNNGATCGTCGGACTGTAGAACTCTGAACCCCTATAGTGAGTCGTATTACCGGCCTCAATCGAA
	MseI_384-barcodes_138	TAATCTCCTTCGGCNNNNNNNNGATCGTCGGACTGTAGAACTCTGAACCCCTATAGTGAGTCGTATTACCGGCCTCAATCGAA
	MseI_384-barcodes_139	TAAACACCGGCGAANNNNNNNNGATCGTCGGACTGTAGAACTCTGAACCCCTATAGTGAGTCGTATTACCGGCCTCAATCGAA
	MseI_384-barcodes_140	TAAAACAGCATTCCNNNNNNNNGATCGTCGGACTGTAGAACTCTGAACCCCTATAGTGAGTCGTATTACCGGCCTCAATCGAA
	MseI_384-barcodes_141	TAACACCTAGACTTNNNNNNNNGATCGTCGGACTGTAGAACTCTGAACCCCTATAGTGAGTCGTATTACCGGCCTCAATCGAA
	MseI_384-barcodes_142	TAACATATCCACACNNNNNNNNGATCGTCGGACTGTAGAACTCTGAACCCCTATAGTGAGTCGTATTACCGGCCTCAATCGAA
	MseI_384-barcodes_143	TAATGGTGGATTACNNNNNNNNGATCGTCGGACTGTAGAACTCTGAACCCCTATAGTGAGTCGTATTACCGGCCTCAATCGAA
	MseI_384-barcodes_144	TAATGGCTCACGATNNNNNNNNGATCGTCGGACTGTAGAACTCTGAACCCCTATAGTGAGTCGTATTACCGGCCTCAATCGAA
	MseI_384-barcodes_145	TAAAGAAGGTACGCNNNNNNNNGATCGTCGGACTGTAGAACTCTGAACCCCTATAGTGAGTCGTATTACCGGCCTCAATCGAA
	MseI_384-barcodes_146	TAAAATGCGCCAAGNNNNNNNNGATCGTCGGACTGTAGAACTCTGAACCCCTATAGTGAGTCGTATTACCGGCCTCAATCGAA
	MseI_384-barcodes_147	TAATTATCGATGAGNNNNNNNNGATCGTCGGACTGTAGAACTCTGAACCCCTATAGTGAGTCGTATTACCGGCCTCAATCGAA
	MseI_384-barcodes_148	TAAATCACACGGAANNNNNNNNGATCGTCGGACTGTAGAACTCTGAACCCCTATAGTGAGTCGTATTACCGGCCTCAATCGAA
	MseI_384-barcodes_149	TAACAAGGTAGTACNNNNNNNNGATCGTCGGACTGTAGAACTCTGAACCCCTATAGTGAGTCGTATTACCGGCCTCAATCGAA
	MseI_384-barcodes_150	TAAATACTGCGACGNNNNNNNNGATCGTCGGACTGTAGAACTCTGAACCCCTATAGTGAGTCGTATTACCGGCCTCAATCGAA
	MseI_384-barcodes_151	TAAGTCAGTATGGTNNNNNNNNGATCGTCGGACTGTAGAACTCTGAACCCCTATAGTGAGTCGTATTACCGGCCTCAATCGAA
	MseI_384-barcodes_152	TAACACTCGACAGGNNNNNNNNGATCGTCGGACTGTAGAACTCTGAACCCCTATAGTGAGTCGTATTACCGGCCTCAATCGAA
	MseI_384-barcodes_153	TAAGCTCGCCAGAANNNNNNNNGATCGTCGGACTGTAGAACTCTGAACCCCTATAGTGAGTCGTATTACCGGCCTCAATCGAA
	MseI_384-barcodes_154	TAATAGTCACCACGNNNNNNNNGATCGTCGGACTGTAGAACTCTGAACCCCTATAGTGAGTCGTATTACCGGCCTCAATCGAA
	MseI_384-barcodes_155	TAACAGTAGCCATANNNNNNNNGATCGTCGGACTGTAGAACTCTGAACCCCTATAGTGAGTCGTATTACCGGCCTCAATCGAA
	MseI_384-barcodes_156	TAACGAGAGGTACGNNNNNNNNGATCGTCGGACTGTAGAACTCTGAACCCCTATAGTGAGTCGTATTACCGGCCTCAATCGAA
	MseI_384-barcodes_157	TAAGTGCGCGCATTNNNNNNNNGATCGTCGGACTGTAGAACTCTGAACCCCTATAGTGAGTCGTATTACCGGCCTCAATCGAA
	MseI_384-barcodes_158	TAATCTTAAGAGCANNNNNNNNGATCGTCGGACTGTAGAACTCTGAACCCCTATAGTGAGTCGTATTACCGGCCTCAATCGAA
	MseI_384-barcodes_159	TAATGGCATTGCTCNNNNNNNNGATCGTCGGACTGTAGAACTCTGAACCCCTATAGTGAGTCGTATTACCGGCCTCAATCGAA
	MseI_384-barcodes_160	TAAGACCGGAAGCANNNNNNNNGATCGTCGGACTGTAGAACTCTGAACCCCTATAGTGAGTCGTATTACCGGCCTCAATCGAA
	MseI_384-barcodes_161	TAATGGTATGCACANNNNNNNNGATCGTCGGACTGTAGAACTCTGAACCCCTATAGTGAGTCGTATTACCGGCCTCAATCGAA
	MseI_384-barcodes_162	TAAGCTCTTGGTGTNNNNNNNNGATCGTCGGACTGTAGAACTCTGAACCCCTATAGTGAGTCGTATTACCGGCCTCAATCGAA
	MseI_384-barcodes_163	TAATGTCGAGTGTANNNNNNNNGATCGTCGGACTGTAGAACTCTGAACCCCTATAGTGAGTCGTATTACCGGCCTCAATCGAA
	MseI_384-barcodes_164	TAAATGGCTTCTAGNNNNNNNNGATCGTCGGACTGTAGAACTCTGAACCCCTATAGTGAGTCGTATTACCGGCCTCAATCGAA
	MseI_384-barcodes_165	TAACCGTGGATCCANNNNNNNNGATCGTCGGACTGTAGAACTCTGAACCCCTATAGTGAGTCGTATTACCGGCCTCAATCGAA
	MseI_384-barcodes_166	TAACGCGCCTTACTNNNNNNNNGATCGTCGGACTGTAGAACTCTGAACCCCTATAGTGAGTCGTATTACCGGCCTCAATCGAA
	MseI_384-barcodes_167	TAAGAAGTTAGACTNNNNNNNNGATCGTCGGACTGTAGAACTCTGAACCCCTATAGTGAGTCGTATTACCGGCCTCAATCGAA
	MseI_384-barcodes_168	TAAGATGACATATGNNNNNNNNGATCGTCGGACTGTAGAACTCTGAACCCCTATAGTGAGTCGTATTACCGGCCTCAATCGAA
	MseI_384-barcodes_169	TAATTAGCTGGCCANNNNNNNNGATCGTCGGACTGTAGAACTCTGAACCCCTATAGTGAGTCGTATTACCGGCCTCAATCGAA
	MseI_384-barcodes_170	TAAGGTGCCGACTANNNNNNNNGATCGTCGGACTGTAGAACTCTGAACCCCTATAGTGAGTCGTATTACCGGCCTCAATCGAA
	MseI_384-barcodes_171	TAATAACCAAGACANNNNNNNNGATCGTCGGACTGTAGAACTCTGAACCCCTATAGTGAGTCGTATTACCGGCCTCAATCGAA
	MseI_384-barcodes_172	TAACAGGCTTAATTNNNNNNNNGATCGTCGGACTGTAGAACTCTGAACCCCTATAGTGAGTCGTATTACCGGCCTCAATCGAA
	MseI_384-barcodes_173	TAACAGAGACAAGGNNNNNNNNGATCGTCGGACTGTAGAACTCTGAACCCCTATAGTGAGTCGTATTACCGGCCTCAATCGAA
	MseI_384-barcodes_174	TAAGCGGAGCGATTNNNNNNNNGATCGTCGGACTGTAGAACTCTGAACCCCTATAGTGAGTCGTATTACCGGCCTCAATCGAA
	MseI_384-barcodes_175	TAAAGCGCGATGATNNNNNNNNGATCGTCGGACTGTAGAACTCTGAACCCCTATAGTGAGTCGTATTACCGGCCTCAATCGAA
	MseI_384-barcodes_176	TAACTGTGTGTAGCNNNNNNNNGATCGTCGGACTGTAGAACTCTGAACCCCTATAGTGAGTCGTATTACCGGCCTCAATCGAA
	MseI_384-barcodes_177	TAAAAGCTTGGAGANNNNNNNNGATCGTCGGACTGTAGAACTCTGAACCCCTATAGTGAGTCGTATTACCGGCCTCAATCGAA
	MseI_384-barcodes_178	TAAGGCGTGAATTGNNNNNNNNGATCGTCGGACTGTAGAACTCTGAACCCCTATAGTGAGTCGTATTACCGGCCTCAATCGAA
	MseI_384-barcodes_179	TAAAACACGCTAGCNNNNNNNNGATCGTCGGACTGTAGAACTCTGAACCCCTATAGTGAGTCGTATTACCGGCCTCAATCGAA
	MseI_384-barcodes_180	TAATTCGTAATGGCNNNNNNNNGATCGTCGGACTGTAGAACTCTGAACCCCTATAGTGAGTCGTATTACCGGCCTCAATCGAA
	MseI_384-barcodes_181	TAAATGAGCAAGCTNNNNNNNNGATCGTCGGACTGTAGAACTCTGAACCCCTATAGTGAGTCGTATTACCGGCCTCAATCGAA
	MseI_384-barcodes_182	TAATCCTGCACCACNNNNNNNNGATCGTCGGACTGTAGAACTCTGAACCCCTATAGTGAGTCGTATTACCGGCCTCAATCGAA
	MseI_384-barcodes_183	TAACCTTACTCACGNNNNNNNNGATCGTCGGACTGTAGAACTCTGAACCCCTATAGTGAGTCGTATTACCGGCCTCAATCGAA
	MseI_384-barcodes_184	TAAGAGTCGTGGTGNNNNNNNNGATCGTCGGACTGTAGAACTCTGAACCCCTATAGTGAGTCGTATTACCGGCCTCAATCGAA
	MseI_384-barcodes_185	TAAGCCTACGGAATNNNNNNNNGATCGTCGGACTGTAGAACTCTGAACCCCTATAGTGAGTCGTATTACCGGCCTCAATCGAA
	MseI_384-barcodes_186	TAACCGAGAAGTAANNNNNNNNGATCGTCGGACTGTAGAACTCTGAACCCCTATAGTGAGTCGTATTACCGGCCTCAATCGAA
	MseI_384-barcodes_187	TAATTGGCGAGCTTNNNNNNNNGATCGTCGGACTGTAGAACTCTGAACCCCTATAGTGAGTCGTATTACCGGCCTCAATCGAA
	MseI_384-barcodes_188	TAACTGTATCGGCCNNNNNNNNGATCGTCGGACTGTAGAACTCTGAACCCCTATAGTGAGTCGTATTACCGGCCTCAATCGAA
	MseI_384-barcodes_189	TAATGCGAATGTAANNNNNNNNGATCGTCGGACTGTAGAACTCTGAACCCCTATAGTGAGTCGTATTACCGGCCTCAATCGAA
	MseI_384-barcodes_190	TAATGACTAGTTCGNNNNNNNNGATCGTCGGACTGTAGAACTCTGAACCCCTATAGTGAGTCGTATTACCGGCCTCAATCGAA
	MseI_384-barcodes_191	TAAACCTAGAGTGCNNNNNNNNGATCGTCGGACTGTAGAACTCTGAACCCCTATAGTGAGTCGTATTACCGGCCTCAATCGAA
	MseI_384-barcodes_192	TAATATCCGAAGGTNNNNNNNNGATCGTCGGACTGTAGAACTCTGAACCCCTATAGTGAGTCGTATTACCGGCCTCAATCGAA
	MseI_384-barcodes_193	TAAAGTAGCGGACANNNNNNNNGATCGTCGGACTGTAGAACTCTGAACCCCTATAGTGAGTCGTATTACCGGCCTCAATCGAA
	MseI_384-barcodes_194	TAACTATCCACCGANNNNNNNNGATCGTCGGACTGTAGAACTCTGAACCCCTATAGTGAGTCGTATTACCGGCCTCAATCGAA
	MseI_384-barcodes_195	TAACACGCTCCTAANNNNNNNNGATCGTCGGACTGTAGAACTCTGAACCCCTATAGTGAGTCGTATTACCGGCCTCAATCGAA
	MseI_384-barcodes_196	TAATAAGCGCATACNNNNNNNNGATCGTCGGACTGTAGAACTCTGAACCCCTATAGTGAGTCGTATTACCGGCCTCAATCGAA
	MseI_384-barcodes_197	TAAGTTCACAATACNNNNNNNNGATCGTCGGACTGTAGAACTCTGAACCCCTATAGTGAGTCGTATTACCGGCCTCAATCGAA
	MseI_384-barcodes_198	TAATAGAGTGATACNNNNNNNNGATCGTCGGACTGTAGAACTCTGAACCCCTATAGTGAGTCGTATTACCGGCCTCAATCGAA
	MseI_384-barcodes_199	TAAACGGACTCTTCNNNNNNNNGATCGTCGGACTGTAGAACTCTGAACCCCTATAGTGAGTCGTATTACCGGCCTCAATCGAA
	MseI_384-barcodes_200	TAAGAGTTGAAGATNNNNNNNNGATCGTCGGACTGTAGAACTCTGAACCCCTATAGTGAGTCGTATTACCGGCCTCAATCGAA
	MseI_384-barcodes_201	TAACAAGTCGTGGTNNNNNNNNGATCGTCGGACTGTAGAACTCTGAACCCCTATAGTGAGTCGTATTACCGGCCTCAATCGAA
	MseI_384-barcodes_202	TAATAGCTATAGAGNNNNNNNNGATCGTCGGACTGTAGAACTCTGAACCCCTATAGTGAGTCGTATTACCGGCCTCAATCGAA
	MseI_384-barcodes_203	TAAGTCTCTTACAGNNNNNNNNGATCGTCGGACTGTAGAACTCTGAACCCCTATAGTGAGTCGTATTACCGGCCTCAATCGAA
	MseI_384-barcodes_204	TAACCGCTTCGTTCNNNNNNNNGATCGTCGGACTGTAGAACTCTGAACCCCTATAGTGAGTCGTATTACCGGCCTCAATCGAA
	MseI_384-barcodes_205	TAATCCAGACTCGTNNNNNNNNGATCGTCGGACTGTAGAACTCTGAACCCCTATAGTGAGTCGTATTACCGGCCTCAATCGAA
	MseI_384-barcodes_206	TAATCTGGACAATCNNNNNNNNGATCGTCGGACTGTAGAACTCTGAACCCCTATAGTGAGTCGTATTACCGGCCTCAATCGAA
	MseI_384-barcodes_207	TAAGCTACGAGTGGNNNNNNNNGATCGTCGGACTGTAGAACTCTGAACCCCTATAGTGAGTCGTATTACCGGCCTCAATCGAA
	MseI_384-barcodes_208	TAAGATGCGTCTTANNNNNNNNGATCGTCGGACTGTAGAACTCTGAACCCCTATAGTGAGTCGTATTACCGGCCTCAATCGAA
	MseI_384-barcodes_209	TAAATCGAGTACTGNNNNNNNNGATCGTCGGACTGTAGAACTCTGAACCCCTATAGTGAGTCGTATTACCGGCCTCAATCGAA
	MseI_384-barcodes_210	TAAATCCACCAACTNNNNNNNNGATCGTCGGACTGTAGAACTCTGAACCCCTATAGTGAGTCGTATTACCGGCCTCAATCGAA
	MseI_384-barcodes_211	TAAAGTCCAAGGTCNNNNNNNNGATCGTCGGACTGTAGAACTCTGAACCCCTATAGTGAGTCGTATTACCGGCCTCAATCGAA
	MseI_384-barcodes_212	TAATCTGGTAGTTANNNNNNNNGATCGTCGGACTGTAGAACTCTGAACCCCTATAGTGAGTCGTATTACCGGCCTCAATCGAA
	MseI_384-barcodes_213	TAAAGACGCTCGGTNNNNNNNNGATCGTCGGACTGTAGAACTCTGAACCCCTATAGTGAGTCGTATTACCGGCCTCAATCGAA
	MseI_384-barcodes_214	TAAACGTCTTCATANNNNNNNNGATCGTCGGACTGTAGAACTCTGAACCCCTATAGTGAGTCGTATTACCGGCCTCAATCGAA
	MseI_384-barcodes_215	TAACCAGACGATATNNNNNNNNGATCGTCGGACTGTAGAACTCTGAACCCCTATAGTGAGTCGTATTACCGGCCTCAATCGAA
	MseI_384-barcodes_216	TAAACTCTGTATTGNNNNNNNNGATCGTCGGACTGTAGAACTCTGAACCCCTATAGTGAGTCGTATTACCGGCCTCAATCGAA
	MseI_384-barcodes_217	TAACAGAACGTGCGNNNNNNNNGATCGTCGGACTGTAGAACTCTGAACCCCTATAGTGAGTCGTATTACCGGCCTCAATCGAA
	MseI_384-barcodes_218	TAACGGACATATCCNNNNNNNNGATCGTCGGACTGTAGAACTCTGAACCCCTATAGTGAGTCGTATTACCGGCCTCAATCGAA
	MseI_384-barcodes_219	TAAACAGATGTCGANNNNNNNNGATCGTCGGACTGTAGAACTCTGAACCCCTATAGTGAGTCGTATTACCGGCCTCAATCGAA
	MseI_384-barcodes_220	TAAGTGTCGTCTCTNNNNNNNNGATCGTCGGACTGTAGAACTCTGAACCCCTATAGTGAGTCGTATTACCGGCCTCAATCGAA
	MseI_384-barcodes_221	TAACTATGTTGTGANNNNNNNNGATCGTCGGACTGTAGAACTCTGAACCCCTATAGTGAGTCGTATTACCGGCCTCAATCGAA
	MseI_384-barcodes_222	TAAACATCACTCAGNNNNNNNNGATCGTCGGACTGTAGAACTCTGAACCCCTATAGTGAGTCGTATTACCGGCCTCAATCGAA
	MseI_384-barcodes_223	TAATAATTCCAGTGNNNNNNNNGATCGTCGGACTGTAGAACTCTGAACCCCTATAGTGAGTCGTATTACCGGCCTCAATCGAA
	MseI_384-barcodes_224	TAAAACTGCTCGCANNNNNNNNGATCGTCGGACTGTAGAACTCTGAACCCCTATAGTGAGTCGTATTACCGGCCTCAATCGAA
	MseI_384-barcodes_225	TAAGTATGAACTCANNNNNNNNGATCGTCGGACTGTAGAACTCTGAACCCCTATAGTGAGTCGTATTACCGGCCTCAATCGAA
	MseI_384-barcodes_226	TAACTTCATACCTANNNNNNNNGATCGTCGGACTGTAGAACTCTGAACCCCTATAGTGAGTCGTATTACCGGCCTCAATCGAA
	MseI_384-barcodes_227	TAAAGCATAGCAAGNNNNNNNNGATCGTCGGACTGTAGAACTCTGAACCCCTATAGTGAGTCGTATTACCGGCCTCAATCGAA
	MseI_384-barcodes_228	TAAACATGCGCTTGNNNNNNNNGATCGTCGGACTGTAGAACTCTGAACCCCTATAGTGAGTCGTATTACCGGCCTCAATCGAA
	MseI_384-barcodes_229	TAAGGTACGTAACANNNNNNNNGATCGTCGGACTGTAGAACTCTGAACCCCTATAGTGAGTCGTATTACCGGCCTCAATCGAA
	MseI_384-barcodes_230	TAAACGTACCATGANNNNNNNNGATCGTCGGACTGTAGAACTCTGAACCCCTATAGTGAGTCGTATTACCGGCCTCAATCGAA
	MseI_384-barcodes_231	TAATACACCAACCGNNNNNNNNGATCGTCGGACTGTAGAACTCTGAACCCCTATAGTGAGTCGTATTACCGGCCTCAATCGAA
	MseI_384-barcodes_232	TAAGCCGATACTATNNNNNNNNGATCGTCGGACTGTAGAACTCTGAACCCCTATAGTGAGTCGTATTACCGGCCTCAATCGAA
	MseI_384-barcodes_233	TAACGCCGACTTAANNNNNNNNGATCGTCGGACTGTAGAACTCTGAACCCCTATAGTGAGTCGTATTACCGGCCTCAATCGAA
	MseI_384-barcodes_234	TAACAACGAATATGNNNNNNNNGATCGTCGGACTGTAGAACTCTGAACCCCTATAGTGAGTCGTATTACCGGCCTCAATCGAA
	MseI_384-barcodes_235	TAACAGTGCACGGTNNNNNNNNGATCGTCGGACTGTAGAACTCTGAACCCCTATAGTGAGTCGTATTACCGGCCTCAATCGAA
	MseI_384-barcodes_236	TAATCCGATTCGTANNNNNNNNGATCGTCGGACTGTAGAACTCTGAACCCCTATAGTGAGTCGTATTACCGGCCTCAATCGAA
	MseI_384-barcodes_237	TAATTACTAACAGGNNNNNNNNGATCGTCGGACTGTAGAACTCTGAACCCCTATAGTGAGTCGTATTACCGGCCTCAATCGAA
	MseI_384-barcodes_238	TAATACCGTCTCCANNNNNNNNGATCGTCGGACTGTAGAACTCTGAACCCCTATAGTGAGTCGTATTACCGGCCTCAATCGAA
	MseI_384-barcodes_239	TAAGGCCTACACGANNNNNNNNGATCGTCGGACTGTAGAACTCTGAACCCCTATAGTGAGTCGTATTACCGGCCTCAATCGAA
	MseI_384-barcodes_240	TAAGAACCATATTGNNNNNNNNGATCGTCGGACTGTAGAACTCTGAACCCCTATAGTGAGTCGTATTACCGGCCTCAATCGAA
	MseI_384-barcodes_241	TAACTGGAAGACGGNNNNNNNNGATCGTCGGACTGTAGAACTCTGAACCCCTATAGTGAGTCGTATTACCGGCCTCAATCGAA
	MseI_384-barcodes_242	TAAGCCTCATGTTCNNNNNNNNGATCGTCGGACTGTAGAACTCTGAACCCCTATAGTGAGTCGTATTACCGGCCTCAATCGAA
	MseI_384-barcodes_243	TAAACGTCCGAGACNNNNNNNNGATCGTCGGACTGTAGAACTCTGAACCCCTATAGTGAGTCGTATTACCGGCCTCAATCGAA
	MseI_384-barcodes_244	TAAAGTGACGCAACNNNNNNNNGATCGTCGGACTGTAGAACTCTGAACCCCTATAGTGAGTCGTATTACCGGCCTCAATCGAA
	MseI_384-barcodes_245	TAACGCCAATAGCGNNNNNNNNGATCGTCGGACTGTAGAACTCTGAACCCCTATAGTGAGTCGTATTACCGGCCTCAATCGAA
	MseI_384-barcodes_246	TAAACGAATCTGATNNNNNNNNGATCGTCGGACTGTAGAACTCTGAACCCCTATAGTGAGTCGTATTACCGGCCTCAATCGAA
	MseI_384-barcodes_247	TAAATTCGACGTCANNNNNNNNGATCGTCGGACTGTAGAACTCTGAACCCCTATAGTGAGTCGTATTACCGGCCTCAATCGAA
	MseI_384-barcodes_248	TAAGCGAGGATATCNNNNNNNNGATCGTCGGACTGTAGAACTCTGAACCCCTATAGTGAGTCGTATTACCGGCCTCAATCGAA
	MseI_384-barcodes_249	TAAGTAGTCACGCGNNNNNNNNGATCGTCGGACTGTAGAACTCTGAACCCCTATAGTGAGTCGTATTACCGGCCTCAATCGAA
	MseI_384-barcodes_250	TAAATACATTCCGCNNNNNNNNGATCGTCGGACTGTAGAACTCTGAACCCCTATAGTGAGTCGTATTACCGGCCTCAATCGAA
	MseI_384-barcodes_251	TAAGGCCGGTATACNNNNNNNNGATCGTCGGACTGTAGAACTCTGAACCCCTATAGTGAGTCGTATTACCGGCCTCAATCGAA
	MseI_384-barcodes_252	TAACGCTGAAGGACNNNNNNNNGATCGTCGGACTGTAGAACTCTGAACCCCTATAGTGAGTCGTATTACCGGCCTCAATCGAA
	MseI_384-barcodes_253	TAATACGGAAGTCGNNNNNNNNGATCGTCGGACTGTAGAACTCTGAACCCCTATAGTGAGTCGTATTACCGGCCTCAATCGAA
	MseI_384-barcodes_254	TAACAGGTCTCGTGNNNNNNNNGATCGTCGGACTGTAGAACTCTGAACCCCTATAGTGAGTCGTATTACCGGCCTCAATCGAA
	MseI_384-barcodes_255	TAACGGTTAGCCGANNNNNNNNGATCGTCGGACTGTAGAACTCTGAACCCCTATAGTGAGTCGTATTACCGGCCTCAATCGAA
	MseI_384-barcodes_256	TAACCAGTGCTTGCNNNNNNNNGATCGTCGGACTGTAGAACTCTGAACCCCTATAGTGAGTCGTATTACCGGCCTCAATCGAA
	MseI_384-barcodes_257	TAAAGGCGCCACTANNNNNNNNGATCGTCGGACTGTAGAACTCTGAACCCCTATAGTGAGTCGTATTACCGGCCTCAATCGAA
	MseI_384-barcodes_258	TAATTAAGGAGTGCNNNNNNNNGATCGTCGGACTGTAGAACTCTGAACCCCTATAGTGAGTCGTATTACCGGCCTCAATCGAA
	MseI_384-barcodes_259	TAAGAGCAGGAGTCNNNNNNNNGATCGTCGGACTGTAGAACTCTGAACCCCTATAGTGAGTCGTATTACCGGCCTCAATCGAA
	MseI_384-barcodes_260	TAATATCGGCCACTNNNNNNNNGATCGTCGGACTGTAGAACTCTGAACCCCTATAGTGAGTCGTATTACCGGCCTCAATCGAA
	MseI_384-barcodes_261	TAATTAGATGATGCNNNNNNNNGATCGTCGGACTGTAGAACTCTGAACCCCTATAGTGAGTCGTATTACCGGCCTCAATCGAA
	MseI_384-barcodes_262	TAAGTACGTGTGCCNNNNNNNNGATCGTCGGACTGTAGAACTCTGAACCCCTATAGTGAGTCGTATTACCGGCCTCAATCGAA
	MseI_384-barcodes_263	TAATGATCACGTTGNNNNNNNNGATCGTCGGACTGTAGAACTCTGAACCCCTATAGTGAGTCGTATTACCGGCCTCAATCGAA
	MseI_384-barcodes_264	TAATCAGTCGAAGANNNNNNNNGATCGTCGGACTGTAGAACTCTGAACCCCTATAGTGAGTCGTATTACCGGCCTCAATCGAA
	MseI_384-barcodes_265	TAACATTCCAGAACNNNNNNNNGATCGTCGGACTGTAGAACTCTGAACCCCTATAGTGAGTCGTATTACCGGCCTCAATCGAA
	MseI_384-barcodes_266	TAACCGCTAGAACGNNNNNNNNGATCGTCGGACTGTAGAACTCTGAACCCCTATAGTGAGTCGTATTACCGGCCTCAATCGAA
	MseI_384-barcodes_267	TAAAATACTTGCGCNNNNNNNNGATCGTCGGACTGTAGAACTCTGAACCCCTATAGTGAGTCGTATTACCGGCCTCAATCGAA
	MseI_384-barcodes_268	TAATCTCATCTATGNNNNNNNNGATCGTCGGACTGTAGAACTCTGAACCCCTATAGTGAGTCGTATTACCGGCCTCAATCGAA
	MseI_384-barcodes_269	TAATGCACTCTGTTNNNNNNNNGATCGTCGGACTGTAGAACTCTGAACCCCTATAGTGAGTCGTATTACCGGCCTCAATCGAA
	MseI_384-barcodes_270	TAATTGATCTTGGTNNNNNNNNGATCGTCGGACTGTAGAACTCTGAACCCCTATAGTGAGTCGTATTACCGGCCTCAATCGAA
	MseI_384-barcodes_271	TAACTAGTTGCAACNNNNNNNNGATCGTCGGACTGTAGAACTCTGAACCCCTATAGTGAGTCGTATTACCGGCCTCAATCGAA
	MseI_384-barcodes_272	TAAACATTGTTCCTNNNNNNNNGATCGTCGGACTGTAGAACTCTGAACCCCTATAGTGAGTCGTATTACCGGCCTCAATCGAA
	MseI_384-barcodes_273	TAATGCCTCATCTANNNNNNNNGATCGTCGGACTGTAGAACTCTGAACCCCTATAGTGAGTCGTATTACCGGCCTCAATCGAA
	MseI_384-barcodes_274	TAATGGACAATTGGNNNNNNNNGATCGTCGGACTGTAGAACTCTGAACCCCTATAGTGAGTCGTATTACCGGCCTCAATCGAA
	MseI_384-barcodes_275	TAAGACGATTGTGCNNNNNNNNGATCGTCGGACTGTAGAACTCTGAACCCCTATAGTGAGTCGTATTACCGGCCTCAATCGAA
	MseI_384-barcodes_276	TAATTCTAGTGACTNNNNNNNNGATCGTCGGACTGTAGAACTCTGAACCCCTATAGTGAGTCGTATTACCGGCCTCAATCGAA
	MseI_384-barcodes_277	TAAGCTGTGTCACTNNNNNNNNGATCGTCGGACTGTAGAACTCTGAACCCCTATAGTGAGTCGTATTACCGGCCTCAATCGAA
	MseI_384-barcodes_278	TAAGTATCAGACTTNNNNNNNNGATCGTCGGACTGTAGAACTCTGAACCCCTATAGTGAGTCGTATTACCGGCCTCAATCGAA
	MseI_384-barcodes_279	TAAGAGGAATTCTTNNNNNNNNGATCGTCGGACTGTAGAACTCTGAACCCCTATAGTGAGTCGTATTACCGGCCTCAATCGAA
	MseI_384-barcodes_280	TAATCAGACCACCGNNNNNNNNGATCGTCGGACTGTAGAACTCTGAACCCCTATAGTGAGTCGTATTACCGGCCTCAATCGAA
	MseI_384-barcodes_281	TAAATTAACACTCGNNNNNNNNGATCGTCGGACTGTAGAACTCTGAACCCCTATAGTGAGTCGTATTACCGGCCTCAATCGAA
	MseI_384-barcodes_282	TAAGCTCCTATTCANNNNNNNNGATCGTCGGACTGTAGAACTCTGAACCCCTATAGTGAGTCGTATTACCGGCCTCAATCGAA
	MseI_384-barcodes_283	TAAGGTTAGCTGCTNNNNNNNNGATCGTCGGACTGTAGAACTCTGAACCCCTATAGTGAGTCGTATTACCGGCCTCAATCGAA
	MseI_384-barcodes_284	TAATAGACTAGTCTNNNNNNNNGATCGTCGGACTGTAGAACTCTGAACCCCTATAGTGAGTCGTATTACCGGCCTCAATCGAA
	MseI_384-barcodes_285	TAAGGAGATCAATCNNNNNNNNGATCGTCGGACTGTAGAACTCTGAACCCCTATAGTGAGTCGTATTACCGGCCTCAATCGAA
	MseI_384-barcodes_286	TAAGTGCATTAATGNNNNNNNNGATCGTCGGACTGTAGAACTCTGAACCCCTATAGTGAGTCGTATTACCGGCCTCAATCGAA
	MseI_384-barcodes_287	TAAAGGAAGTCGTANNNNNNNNGATCGTCGGACTGTAGAACTCTGAACCCCTATAGTGAGTCGTATTACCGGCCTCAATCGAA
	MseI_384-barcodes_288	TAAGTGATTGTGAANNNNNNNNGATCGTCGGACTGTAGAACTCTGAACCCCTATAGTGAGTCGTATTACCGGCCTCAATCGAA
	MseI_384-barcodes_289	TAACGGCCTAGGAANNNNNNNNGATCGTCGGACTGTAGAACTCTGAACCCCTATAGTGAGTCGTATTACCGGCCTCAATCGAA
	MseI_384-barcodes_290	TAACTCCACTTCCANNNNNNNNGATCGTCGGACTGTAGAACTCTGAACCCCTATAGTGAGTCGTATTACCGGCCTCAATCGAA
	MseI_384-barcodes_291	TAACGTTCATCGCTNNNNNNNNGATCGTCGGACTGTAGAACTCTGAACCCCTATAGTGAGTCGTATTACCGGCCTCAATCGAA
	MseI_384-barcodes_292	TAAGATCGCAGCGTNNNNNNNNGATCGTCGGACTGTAGAACTCTGAACCCCTATAGTGAGTCGTATTACCGGCCTCAATCGAA
	MseI_384-barcodes_293	TAAGCTCTAGTGAGNNNNNNNNGATCGTCGGACTGTAGAACTCTGAACCCCTATAGTGAGTCGTATTACCGGCCTCAATCGAA
	MseI_384-barcodes_294	TAAGTTATCCGTATNNNNNNNNGATCGTCGGACTGTAGAACTCTGAACCCCTATAGTGAGTCGTATTACCGGCCTCAATCGAA
	MseI_384-barcodes_295	TAAAGGTCCAATCGNNNNNNNNGATCGTCGGACTGTAGAACTCTGAACCCCTATAGTGAGTCGTATTACCGGCCTCAATCGAA
	MseI_384-barcodes_296	TAATCGCTTATCAGNNNNNNNNGATCGTCGGACTGTAGAACTCTGAACCCCTATAGTGAGTCGTATTACCGGCCTCAATCGAA
	MseI_384-barcodes_297	TAATGCATCCATAANNNNNNNNGATCGTCGGACTGTAGAACTCTGAACCCCTATAGTGAGTCGTATTACCGGCCTCAATCGAA
	MseI_384-barcodes_298	TAATGCAGATCACANNNNNNNNGATCGTCGGACTGTAGAACTCTGAACCCCTATAGTGAGTCGTATTACCGGCCTCAATCGAA
	MseI_384-barcodes_299	TAATTGGCGCAAGANNNNNNNNGATCGTCGGACTGTAGAACTCTGAACCCCTATAGTGAGTCGTATTACCGGCCTCAATCGAA
	MseI_384-barcodes_300	TAAATGGTCGCCAANNNNNNNNGATCGTCGGACTGTAGAACTCTGAACCCCTATAGTGAGTCGTATTACCGGCCTCAATCGAA
	MseI_384-barcodes_301	TAATACAACCGAGTNNNNNNNNGATCGTCGGACTGTAGAACTCTGAACCCCTATAGTGAGTCGTATTACCGGCCTCAATCGAA
	MseI_384-barcodes_302	TAATGTACCGGTACNNNNNNNNGATCGTCGGACTGTAGAACTCTGAACCCCTATAGTGAGTCGTATTACCGGCCTCAATCGAA
	MseI_384-barcodes_303	TAATTGATACGCCANNNNNNNNGATCGTCGGACTGTAGAACTCTGAACCCCTATAGTGAGTCGTATTACCGGCCTCAATCGAA
	MseI_384-barcodes_304	TAACGATGCTAGCCNNNNNNNNGATCGTCGGACTGTAGAACTCTGAACCCCTATAGTGAGTCGTATTACCGGCCTCAATCGAA
	MseI_384-barcodes_305	TAACTATGCTTAAGNNNNNNNNGATCGTCGGACTGTAGAACTCTGAACCCCTATAGTGAGTCGTATTACCGGCCTCAATCGAA
	MseI_384-barcodes_306	TAATTCCTCTAGTCNNNNNNNNGATCGTCGGACTGTAGAACTCTGAACCCCTATAGTGAGTCGTATTACCGGCCTCAATCGAA
	MseI_384-barcodes_307	TAAATGGATCTTCANNNNNNNNGATCGTCGGACTGTAGAACTCTGAACCCCTATAGTGAGTCGTATTACCGGCCTCAATCGAA
	MseI_384-barcodes_308	TAAGTCATTGCTTGNNNNNNNNGATCGTCGGACTGTAGAACTCTGAACCCCTATAGTGAGTCGTATTACCGGCCTCAATCGAA
	MseI_384-barcodes_309	TAAATGACATTGCGNNNNNNNNGATCGTCGGACTGTAGAACTCTGAACCCCTATAGTGAGTCGTATTACCGGCCTCAATCGAA
	MseI_384-barcodes_310	TAACGCACGATTCANNNNNNNNGATCGTCGGACTGTAGAACTCTGAACCCCTATAGTGAGTCGTATTACCGGCCTCAATCGAA
	MseI_384-barcodes_311	TAATTGTGATCTGCNNNNNNNNGATCGTCGGACTGTAGAACTCTGAACCCCTATAGTGAGTCGTATTACCGGCCTCAATCGAA
	MseI_384-barcodes_312	TAAAAGCGTGTCTGNNNNNNNNGATCGTCGGACTGTAGAACTCTGAACCCCTATAGTGAGTCGTATTACCGGCCTCAATCGAA
	MseI_384-barcodes_313	TAATCGTATGTCTTNNNNNNNNGATCGTCGGACTGTAGAACTCTGAACCCCTATAGTGAGTCGTATTACCGGCCTCAATCGAA
	MseI_384-barcodes_314	TAAAATGCGGTCCTNNNNNNNNGATCGTCGGACTGTAGAACTCTGAACCCCTATAGTGAGTCGTATTACCGGCCTCAATCGAA
	MseI_384-barcodes_315	TAACAGTTCTTACANNNNNNNNGATCGTCGGACTGTAGAACTCTGAACCCCTATAGTGAGTCGTATTACCGGCCTCAATCGAA
	MseI_384-barcodes_316	TAAAGTTCACTAGANNNNNNNNGATCGTCGGACTGTAGAACTCTGAACCCCTATAGTGAGTCGTATTACCGGCCTCAATCGAA
	MseI_384-barcodes_317	TAAAAGTGTACAACNNNNNNNNGATCGTCGGACTGTAGAACTCTGAACCCCTATAGTGAGTCGTATTACCGGCCTCAATCGAA
	MseI_384-barcodes_318	TAATAACGGAGCAGNNNNNNNNGATCGTCGGACTGTAGAACTCTGAACCCCTATAGTGAGTCGTATTACCGGCCTCAATCGAA
	MseI_384-barcodes_319	TAATAAGGTCTTGGNNNNNNNNGATCGTCGGACTGTAGAACTCTGAACCCCTATAGTGAGTCGTATTACCGGCCTCAATCGAA
	MseI_384-barcodes_320	TAAATGACTGCCTTNNNNNNNNGATCGTCGGACTGTAGAACTCTGAACCCCTATAGTGAGTCGTATTACCGGCCTCAATCGAA
	MseI_384-barcodes_321	TAACGGATGCCAGTNNNNNNNNGATCGTCGGACTGTAGAACTCTGAACCCCTATAGTGAGTCGTATTACCGGCCTCAATCGAA
	MseI_384-barcodes_322	TAACTAGACAGCAGNNNNNNNNGATCGTCGGACTGTAGAACTCTGAACCCCTATAGTGAGTCGTATTACCGGCCTCAATCGAA
	MseI_384-barcodes_323	TAAGAATTAGGCAGNNNNNNNNGATCGTCGGACTGTAGAACTCTGAACCCCTATAGTGAGTCGTATTACCGGCCTCAATCGAA
	MseI_384-barcodes_324	TAATATGAAGGTTCNNNNNNNNGATCGTCGGACTGTAGAACTCTGAACCCCTATAGTGAGTCGTATTACCGGCCTCAATCGAA
	MseI_384-barcodes_325	TAACTTGCGTGACCNNNNNNNNGATCGTCGGACTGTAGAACTCTGAACCCCTATAGTGAGTCGTATTACCGGCCTCAATCGAA
	MseI_384-barcodes_326	TAAAGGTGACCGTCNNNNNNNNGATCGTCGGACTGTAGAACTCTGAACCCCTATAGTGAGTCGTATTACCGGCCTCAATCGAA
	MseI_384-barcodes_327	TAAACAGCCATAACNNNNNNNNGATCGTCGGACTGTAGAACTCTGAACCCCTATAGTGAGTCGTATTACCGGCCTCAATCGAA
	MseI_384-barcodes_328	TAACCTAGACCGACNNNNNNNNGATCGTCGGACTGTAGAACTCTGAACCCCTATAGTGAGTCGTATTACCGGCCTCAATCGAA
	MseI_384-barcodes_329	TAAGCCAGGTCTGANNNNNNNNGATCGTCGGACTGTAGAACTCTGAACCCCTATAGTGAGTCGTATTACCGGCCTCAATCGAA
	MseI_384-barcodes_330	TAACGATCTCCGTANNNNNNNNGATCGTCGGACTGTAGAACTCTGAACCCCTATAGTGAGTCGTATTACCGGCCTCAATCGAA
	MseI_384-barcodes_331	TAAGCACGATGATANNNNNNNNGATCGTCGGACTGTAGAACTCTGAACCCCTATAGTGAGTCGTATTACCGGCCTCAATCGAA
	MseI_384-barcodes_332	TAACACCAGTGGACNNNNNNNNGATCGTCGGACTGTAGAACTCTGAACCCCTATAGTGAGTCGTATTACCGGCCTCAATCGAA
	MseI_384-barcodes_333	TAATAAGAGTGATGNNNNNNNNGATCGTCGGACTGTAGAACTCTGAACCCCTATAGTGAGTCGTATTACCGGCCTCAATCGAA
	MseI_384-barcodes_334	TAAGCAACGGAGTGNNNNNNNNGATCGTCGGACTGTAGAACTCTGAACCCCTATAGTGAGTCGTATTACCGGCCTCAATCGAA
	MseI_384-barcodes_335	TAACGCGGTTGATANNNNNNNNGATCGTCGGACTGTAGAACTCTGAACCCCTATAGTGAGTCGTATTACCGGCCTCAATCGAA
	MseI_384-barcodes_336	TAAACCGCCAAGTANNNNNNNNGATCGTCGGACTGTAGAACTCTGAACCCCTATAGTGAGTCGTATTACCGGCCTCAATCGAA
	MseI_384-barcodes_337	TAACAAGAACAACANNNNNNNNGATCGTCGGACTGTAGAACTCTGAACCCCTATAGTGAGTCGTATTACCGGCCTCAATCGAA
	MseI_384-barcodes_338	TAAAGAAGAACCATNNNNNNNNGATCGTCGGACTGTAGAACTCTGAACCCCTATAGTGAGTCGTATTACCGGCCTCAATCGAA
	MseI_384-barcodes_339	TAACGAACTGACCTNNNNNNNNGATCGTCGGACTGTAGAACTCTGAACCCCTATAGTGAGTCGTATTACCGGCCTCAATCGAA
	MseI_384-barcodes_340	TAAGTATACCGAGANNNNNNNNGATCGTCGGACTGTAGAACTCTGAACCCCTATAGTGAGTCGTATTACCGGCCTCAATCGAA
	MseI_384-barcodes_341	TAAAGTAGTATGACNNNNNNNNGATCGTCGGACTGTAGAACTCTGAACCCCTATAGTGAGTCGTATTACCGGCCTCAATCGAA
	MseI_384-barcodes_342	TAAGACCTGCTTCGNNNNNNNNGATCGTCGGACTGTAGAACTCTGAACCCCTATAGTGAGTCGTATTACCGGCCTCAATCGAA
	MseI_384-barcodes_343	TAACGTACCTCTGANNNNNNNNGATCGTCGGACTGTAGAACTCTGAACCCCTATAGTGAGTCGTATTACCGGCCTCAATCGAA
	MseI_384-barcodes_344	TAAGTCGATCTAAGNNNNNNNNGATCGTCGGACTGTAGAACTCTGAACCCCTATAGTGAGTCGTATTACCGGCCTCAATCGAA
	MseI_384-barcodes_345	TAAGATAGCTGATCNNNNNNNNGATCGTCGGACTGTAGAACTCTGAACCCCTATAGTGAGTCGTATTACCGGCCTCAATCGAA
	MseI_384-barcodes_346	TAAACCAGGCCATGNNNNNNNNGATCGTCGGACTGTAGAACTCTGAACCCCTATAGTGAGTCGTATTACCGGCCTCAATCGAA
	MseI_384-barcodes_347	TAAGCGGATAAGGANNNNNNNNGATCGTCGGACTGTAGAACTCTGAACCCCTATAGTGAGTCGTATTACCGGCCTCAATCGAA
	MseI_384-barcodes_348	TAAAACGGCTGCTTNNNNNNNNGATCGTCGGACTGTAGAACTCTGAACCCCTATAGTGAGTCGTATTACCGGCCTCAATCGAA
	MseI_384-barcodes_349	TAAGAAGGCGACACNNNNNNNNGATCGTCGGACTGTAGAACTCTGAACCCCTATAGTGAGTCGTATTACCGGCCTCAATCGAA
	MseI_384-barcodes_350	TAAATAGTACGCACNNNNNNNNGATCGTCGGACTGTAGAACTCTGAACCCCTATAGTGAGTCGTATTACCGGCCTCAATCGAA
	MseI_384-barcodes_351	TAATTCGTGTCTCGNNNNNNNNGATCGTCGGACTGTAGAACTCTGAACCCCTATAGTGAGTCGTATTACCGGCCTCAATCGAA
	MseI_384-barcodes_352	TAAACCAATCGCCGNNNNNNNNGATCGTCGGACTGTAGAACTCTGAACCCCTATAGTGAGTCGTATTACCGGCCTCAATCGAA
	MseI_384-barcodes_353	TAAGAGTCAGATAANNNNNNNNGATCGTCGGACTGTAGAACTCTGAACCCCTATAGTGAGTCGTATTACCGGCCTCAATCGAA
	MseI_384-barcodes_354	TAAAATTGCGGTGCNNNNNNNNGATCGTCGGACTGTAGAACTCTGAACCCCTATAGTGAGTCGTATTACCGGCCTCAATCGAA
	MseI_384-barcodes_355	TAATGTTCTCAGACNNNNNNNNGATCGTCGGACTGTAGAACTCTGAACCCCTATAGTGAGTCGTATTACCGGCCTCAATCGAA
	MseI_384-barcodes_356	TAATGTGTTAGCGGNNNNNNNNGATCGTCGGACTGTAGAACTCTGAACCCCTATAGTGAGTCGTATTACCGGCCTCAATCGAA
	MseI_384-barcodes_357	TAACATCATTGCCTNNNNNNNNGATCGTCGGACTGTAGAACTCTGAACCCCTATAGTGAGTCGTATTACCGGCCTCAATCGAA
	MseI_384-barcodes_358	TAATGTGAGACATTNNNNNNNNGATCGTCGGACTGTAGAACTCTGAACCCCTATAGTGAGTCGTATTACCGGCCTCAATCGAA
	MseI_384-barcodes_359	TAATGTTCCTTCAGNNNNNNNNGATCGTCGGACTGTAGAACTCTGAACCCCTATAGTGAGTCGTATTACCGGCCTCAATCGAA
	MseI_384-barcodes_360	TAAAAGCCACAGCCNNNNNNNNGATCGTCGGACTGTAGAACTCTGAACCCCTATAGTGAGTCGTATTACCGGCCTCAATCGAA
	MseI_384-barcodes_361	TAAGTTCCACCATGNNNNNNNNGATCGTCGGACTGTAGAACTCTGAACCCCTATAGTGAGTCGTATTACCGGCCTCAATCGAA
	MseI_384-barcodes_362	TAACCGGTGAGAACNNNNNNNNGATCGTCGGACTGTAGAACTCTGAACCCCTATAGTGAGTCGTATTACCGGCCTCAATCGAA
	MseI_384-barcodes_363	TAAATAAGAGCGGANNNNNNNNGATCGTCGGACTGTAGAACTCTGAACCCCTATAGTGAGTCGTATTACCGGCCTCAATCGAA
	MseI_384-barcodes_364	TAAACTCCTCGGCTNNNNNNNNGATCGTCGGACTGTAGAACTCTGAACCCCTATAGTGAGTCGTATTACCGGCCTCAATCGAA
	MseI_384-barcodes_365	TAATAGAAGCTCAANNNNNNNNGATCGTCGGACTGTAGAACTCTGAACCCCTATAGTGAGTCGTATTACCGGCCTCAATCGAA
	MseI_384-barcodes_366	TAAGGCATTAAGCCNNNNNNNNGATCGTCGGACTGTAGAACTCTGAACCCCTATAGTGAGTCGTATTACCGGCCTCAATCGAA
	MseI_384-barcodes_367	TAATCATCCTAACTNNNNNNNNGATCGTCGGACTGTAGAACTCTGAACCCCTATAGTGAGTCGTATTACCGGCCTCAATCGAA
	MseI_384-barcodes_368	TAACGATAATCTTCNNNNNNNNGATCGTCGGACTGTAGAACTCTGAACCCCTATAGTGAGTCGTATTACCGGCCTCAATCGAA
	MseI_384-barcodes_369	TAATCAGCTTACTCNNNNNNNNGATCGTCGGACTGTAGAACTCTGAACCCCTATAGTGAGTCGTATTACCGGCCTCAATCGAA
	MseI_384-barcodes_370	TAACGCTACAGCCTNNNNNNNNGATCGTCGGACTGTAGAACTCTGAACCCCTATAGTGAGTCGTATTACCGGCCTCAATCGAA
	MseI_384-barcodes_371	TAAGTAAGACATGTNNNNNNNNGATCGTCGGACTGTAGAACTCTGAACCCCTATAGTGAGTCGTATTACCGGCCTCAATCGAA
	MseI_384-barcodes_372	TAAACTATGGCCTCNNNNNNNNGATCGTCGGACTGTAGAACTCTGAACCCCTATAGTGAGTCGTATTACCGGCCTCAATCGAA
	MseI_384-barcodes_373	TAAGTCGAGCCTTCNNNNNNNNGATCGTCGGACTGTAGAACTCTGAACCCCTATAGTGAGTCGTATTACCGGCCTCAATCGAA
	MseI_384-barcodes_374	TAAATCCGAGCCTCNNNNNNNNGATCGTCGGACTGTAGAACTCTGAACCCCTATAGTGAGTCGTATTACCGGCCTCAATCGAA
	MseI_384-barcodes_375	TAATCCGTCATACGNNNNNNNNGATCGTCGGACTGTAGAACTCTGAACCCCTATAGTGAGTCGTATTACCGGCCTCAATCGAA
	MseI_384-barcodes_376	TAAGAGATCTGTGANNNNNNNNGATCGTCGGACTGTAGAACTCTGAACCCCTATAGTGAGTCGTATTACCGGCCTCAATCGAA
	MseI_384-barcodes_377	TAACCAGATCGGAANNNNNNNNGATCGTCGGACTGTAGAACTCTGAACCCCTATAGTGAGTCGTATTACCGGCCTCAATCGAA
	MseI_384-barcodes_378	TAATCTTGTGGAACNNNNNNNNGATCGTCGGACTGTAGAACTCTGAACCCCTATAGTGAGTCGTATTACCGGCCTCAATCGAA
	MseI_384-barcodes_379	TAAGGACTATGGATNNNNNNNNGATCGTCGGACTGTAGAACTCTGAACCCCTATAGTGAGTCGTATTACCGGCCTCAATCGAA
	MseI_384-barcodes_380	TAAACCGTATACAANNNNNNNNGATCGTCGGACTGTAGAACTCTGAACCCCTATAGTGAGTCGTATTACCGGCCTCAATCGAA
	MseI_384-barcodes_381	TAAACAATCTAGAGNNNNNNNNGATCGTCGGACTGTAGAACTCTGAACCCCTATAGTGAGTCGTATTACCGGCCTCAATCGAA
	MseI_384-barcodes_382	TAAGCTTGCCTTGGNNNNNNNNGATCGTCGGACTGTAGAACTCTGAACCCCTATAGTGAGTCGTATTACCGGCCTCAATCGAA
	MseI_384-barcodes_383	TAATCGCAACCAGCNNNNNNNNGATCGTCGGACTGTAGAACTCTGAACCCCTATAGTGAGTCGTATTACCGGCCTCAATCGAA
	MseI_384-barcodes_384	TAACAATACGGTTANNNNNNNNGATCGTCGGACTGTAGAACTCTGAACCCCTATAGTGAGTCGTATTACCGGCCTCAATCGAA

## Sheet: MseI_Rev_384-barcodes
Supplementary Table 3. List of oligonucleotides that can be used to prepare COVseq adapters.
	Adapter ID	Sequence (5'->3')
	MseI_384-barcodes_1	CGATTGAGGCCGGTAATACGACTCACTATAGGGGTTCAGAGTTCTACAGTCCGACGATCNNNNNNNNGAACTCTTCTGT
	MseI_384-barcodes_2	CGATTGAGGCCGGTAATACGACTCACTATAGGGGTTCAGAGTTCTACAGTCCGACGATCNNNNNNNNTCGAACATGATT
	MseI_384-barcodes_3	CGATTGAGGCCGGTAATACGACTCACTATAGGGGTTCAGAGTTCTACAGTCCGACGATCNNNNNNNNGGCATAGCTCGT
	MseI_384-barcodes_4	CGATTGAGGCCGGTAATACGACTCACTATAGGGGTTCAGAGTTCTACAGTCCGACGATCNNNNNNNNAACAGCCGCGAT
	MseI_384-barcodes_5	CGATTGAGGCCGGTAATACGACTCACTATAGGGGTTCAGAGTTCTACAGTCCGACGATCNNNNNNNNCCTCTGTGTGTT
	MseI_384-barcodes_6	CGATTGAGGCCGGTAATACGACTCACTATAGGGGTTCAGAGTTCTACAGTCCGACGATCNNNNNNNNAGCCAACGGCAT
	MseI_384-barcodes_7	CGATTGAGGCCGGTAATACGACTCACTATAGGGGTTCAGAGTTCTACAGTCCGACGATCNNNNNNNNATGACTTCGCGT
	MseI_384-barcodes_8	CGATTGAGGCCGGTAATACGACTCACTATAGGGGTTCAGAGTTCTACAGTCCGACGATCNNNNNNNNCTCGGTCGTCAT
	MseI_384-barcodes_9	CGATTGAGGCCGGTAATACGACTCACTATAGGGGTTCAGAGTTCTACAGTCCGACGATCNNNNNNNNGGTAATTGTGGT
	MseI_384-barcodes_10	CGATTGAGGCCGGTAATACGACTCACTATAGGGGTTCAGAGTTCTACAGTCCGACGATCNNNNNNNNCCGGTCCAAGTT
	MseI_384-barcodes_11	CGATTGAGGCCGGTAATACGACTCACTATAGGGGTTCAGAGTTCTACAGTCCGACGATCNNNNNNNNTGATCTACGACT
	MseI_384-barcodes_12	CGATTGAGGCCGGTAATACGACTCACTATAGGGGTTCAGAGTTCTACAGTCCGACGATCNNNNNNNNCCTCACAGACCT
	MseI_384-barcodes_13	CGATTGAGGCCGGTAATACGACTCACTATAGGGGTTCAGAGTTCTACAGTCCGACGATCNNNNNNNNTAGCTAGATGCT
	MseI_384-barcodes_14	CGATTGAGGCCGGTAATACGACTCACTATAGGGGTTCAGAGTTCTACAGTCCGACGATCNNNNNNNNCAGAGTGTACGT
	MseI_384-barcodes_15	CGATTGAGGCCGGTAATACGACTCACTATAGGGGTTCAGAGTTCTACAGTCCGACGATCNNNNNNNNGATACTGTGCCT
	MseI_384-barcodes_16	CGATTGAGGCCGGTAATACGACTCACTATAGGGGTTCAGAGTTCTACAGTCCGACGATCNNNNNNNNGTTCACGTCTAT
	MseI_384-barcodes_17	CGATTGAGGCCGGTAATACGACTCACTATAGGGGTTCAGAGTTCTACAGTCCGACGATCNNNNNNNNTTGACCATTGGT
	MseI_384-barcodes_18	CGATTGAGGCCGGTAATACGACTCACTATAGGGGTTCAGAGTTCTACAGTCCGACGATCNNNNNNNNCCGCATGACGAT
	MseI_384-barcodes_19	CGATTGAGGCCGGTAATACGACTCACTATAGGGGTTCAGAGTTCTACAGTCCGACGATCNNNNNNNNACGCTTCACATT
	MseI_384-barcodes_20	CGATTGAGGCCGGTAATACGACTCACTATAGGGGTTCAGAGTTCTACAGTCCGACGATCNNNNNNNNCCTTCTCAGCCT
	MseI_384-barcodes_21	CGATTGAGGCCGGTAATACGACTCACTATAGGGGTTCAGAGTTCTACAGTCCGACGATCNNNNNNNNGTTCTCGGTACT
	MseI_384-barcodes_22	CGATTGAGGCCGGTAATACGACTCACTATAGGGGTTCAGAGTTCTACAGTCCGACGATCNNNNNNNNAACTGCTGAAGT
	MseI_384-barcodes_23	CGATTGAGGCCGGTAATACGACTCACTATAGGGGTTCAGAGTTCTACAGTCCGACGATCNNNNNNNNGGAGCACCAATT
	MseI_384-barcodes_24	CGATTGAGGCCGGTAATACGACTCACTATAGGGGTTCAGAGTTCTACAGTCCGACGATCNNNNNNNNACACGATCAAGT
	MseI_384-barcodes_25	CGATTGAGGCCGGTAATACGACTCACTATAGGGGTTCAGAGTTCTACAGTCCGACGATCNNNNNNNNTGCGCCTCATGT
	MseI_384-barcodes_26	CGATTGAGGCCGGTAATACGACTCACTATAGGGGTTCAGAGTTCTACAGTCCGACGATCNNNNNNNNCTGCCATAGCAT
	MseI_384-barcodes_27	CGATTGAGGCCGGTAATACGACTCACTATAGGGGTTCAGAGTTCTACAGTCCGACGATCNNNNNNNNTCAGAATAGCTT
	MseI_384-barcodes_28	CGATTGAGGCCGGTAATACGACTCACTATAGGGGTTCAGAGTTCTACAGTCCGACGATCNNNNNNNNACGTGTTAATCT
	MseI_384-barcodes_29	CGATTGAGGCCGGTAATACGACTCACTATAGGGGTTCAGAGTTCTACAGTCCGACGATCNNNNNNNNGCTGGACTGAAT
	MseI_384-barcodes_30	CGATTGAGGCCGGTAATACGACTCACTATAGGGGTTCAGAGTTCTACAGTCCGACGATCNNNNNNNNGTAGAGAGATTT
	MseI_384-barcodes_31	CGATTGAGGCCGGTAATACGACTCACTATAGGGGTTCAGAGTTCTACAGTCCGACGATCNNNNNNNNTACCGCATGTGT
	MseI_384-barcodes_32	CGATTGAGGCCGGTAATACGACTCACTATAGGGGTTCAGAGTTCTACAGTCCGACGATCNNNNNNNNTGATGGCCTCCT
	MseI_384-barcodes_33	CGATTGAGGCCGGTAATACGACTCACTATAGGGGTTCAGAGTTCTACAGTCCGACGATCNNNNNNNNTGCCTCACGCAT
	MseI_384-barcodes_34	CGATTGAGGCCGGTAATACGACTCACTATAGGGGTTCAGAGTTCTACAGTCCGACGATCNNNNNNNNTATTCGCTTAGT
	MseI_384-barcodes_35	CGATTGAGGCCGGTAATACGACTCACTATAGGGGTTCAGAGTTCTACAGTCCGACGATCNNNNNNNNCGTCGACATTGT
	MseI_384-barcodes_36	CGATTGAGGCCGGTAATACGACTCACTATAGGGGTTCAGAGTTCTACAGTCCGACGATCNNNNNNNNATGTAACGAGAT
	MseI_384-barcodes_37	CGATTGAGGCCGGTAATACGACTCACTATAGGGGTTCAGAGTTCTACAGTCCGACGATCNNNNNNNNCGGTCTATATTT
	MseI_384-barcodes_38	CGATTGAGGCCGGTAATACGACTCACTATAGGGGTTCAGAGTTCTACAGTCCGACGATCNNNNNNNNAGCATGATAGGT
	MseI_384-barcodes_39	CGATTGAGGCCGGTAATACGACTCACTATAGGGGTTCAGAGTTCTACAGTCCGACGATCNNNNNNNNGAGTTGTCGTGT
	MseI_384-barcodes_40	CGATTGAGGCCGGTAATACGACTCACTATAGGGGTTCAGAGTTCTACAGTCCGACGATCNNNNNNNNTCATCTGCAGGT
	MseI_384-barcodes_41	CGATTGAGGCCGGTAATACGACTCACTATAGGGGTTCAGAGTTCTACAGTCCGACGATCNNNNNNNNCATGCAGCTCTT
	MseI_384-barcodes_42	CGATTGAGGCCGGTAATACGACTCACTATAGGGGTTCAGAGTTCTACAGTCCGACGATCNNNNNNNNTGAGAAGGTCAT
	MseI_384-barcodes_43	CGATTGAGGCCGGTAATACGACTCACTATAGGGGTTCAGAGTTCTACAGTCCGACGATCNNNNNNNNGTTAGCCATTCT
	MseI_384-barcodes_44	CGATTGAGGCCGGTAATACGACTCACTATAGGGGTTCAGAGTTCTACAGTCCGACGATCNNNNNNNNGTCGACAAGGTT
	MseI_384-barcodes_45	CGATTGAGGCCGGTAATACGACTCACTATAGGGGTTCAGAGTTCTACAGTCCGACGATCNNNNNNNNGACGGCATCAAT
	MseI_384-barcodes_46	CGATTGAGGCCGGTAATACGACTCACTATAGGGGTTCAGAGTTCTACAGTCCGACGATCNNNNNNNNTACCAGTCAAGT
	MseI_384-barcodes_47	CGATTGAGGCCGGTAATACGACTCACTATAGGGGTTCAGAGTTCTACAGTCCGACGATCNNNNNNNNTCGCACTGAGTT
	MseI_384-barcodes_48	CGATTGAGGCCGGTAATACGACTCACTATAGGGGTTCAGAGTTCTACAGTCCGACGATCNNNNNNNNATCCGGCCTTAT
	MseI_384-barcodes_49	CGATTGAGGCCGGTAATACGACTCACTATAGGGGTTCAGAGTTCTACAGTCCGACGATCNNNNNNNNAAGCGGATTCGT
	MseI_384-barcodes_50	CGATTGAGGCCGGTAATACGACTCACTATAGGGGTTCAGAGTTCTACAGTCCGACGATCNNNNNNNNCCTGATCCGATT
	MseI_384-barcodes_51	CGATTGAGGCCGGTAATACGACTCACTATAGGGGTTCAGAGTTCTACAGTCCGACGATCNNNNNNNNGCTACGTGGACT
	MseI_384-barcodes_52	CGATTGAGGCCGGTAATACGACTCACTATAGGGGTTCAGAGTTCTACAGTCCGACGATCNNNNNNNNCCATTATGGTAT
	MseI_384-barcodes_53	CGATTGAGGCCGGTAATACGACTCACTATAGGGGTTCAGAGTTCTACAGTCCGACGATCNNNNNNNNGAGAACACATAT
	MseI_384-barcodes_54	CGATTGAGGCCGGTAATACGACTCACTATAGGGGTTCAGAGTTCTACAGTCCGACGATCNNNNNNNNCCACACAACATT
	MseI_384-barcodes_55	CGATTGAGGCCGGTAATACGACTCACTATAGGGGTTCAGAGTTCTACAGTCCGACGATCNNNNNNNNCTTAGGCTCCTT
	MseI_384-barcodes_56	CGATTGAGGCCGGTAATACGACTCACTATAGGGGTTCAGAGTTCTACAGTCCGACGATCNNNNNNNNTCTCGTGTCGCT
	MseI_384-barcodes_57	CGATTGAGGCCGGTAATACGACTCACTATAGGGGTTCAGAGTTCTACAGTCCGACGATCNNNNNNNNTTCTGTAGTAGT
	MseI_384-barcodes_58	CGATTGAGGCCGGTAATACGACTCACTATAGGGGTTCAGAGTTCTACAGTCCGACGATCNNNNNNNNAGTCACCTCGGT
	MseI_384-barcodes_59	CGATTGAGGCCGGTAATACGACTCACTATAGGGGTTCAGAGTTCTACAGTCCGACGATCNNNNNNNNAGTCGTCCTCTT
	MseI_384-barcodes_60	CGATTGAGGCCGGTAATACGACTCACTATAGGGGTTCAGAGTTCTACAGTCCGACGATCNNNNNNNNTTCACGCCTCTT
	MseI_384-barcodes_61	CGATTGAGGCCGGTAATACGACTCACTATAGGGGTTCAGAGTTCTACAGTCCGACGATCNNNNNNNNGGCTACACACTT
	MseI_384-barcodes_62	CGATTGAGGCCGGTAATACGACTCACTATAGGGGTTCAGAGTTCTACAGTCCGACGATCNNNNNNNNGGTACTTCCTTT
	MseI_384-barcodes_63	CGATTGAGGCCGGTAATACGACTCACTATAGGGGTTCAGAGTTCTACAGTCCGACGATCNNNNNNNNACAATCTGCGCT
	MseI_384-barcodes_64	CGATTGAGGCCGGTAATACGACTCACTATAGGGGTTCAGAGTTCTACAGTCCGACGATCNNNNNNNNTGGTAGATTACT
	MseI_384-barcodes_65	CGATTGAGGCCGGTAATACGACTCACTATAGGGGTTCAGAGTTCTACAGTCCGACGATCNNNNNNNNGCAGTCGCCTTT
	MseI_384-barcodes_66	CGATTGAGGCCGGTAATACGACTCACTATAGGGGTTCAGAGTTCTACAGTCCGACGATCNNNNNNNNGCAGCTTAAGCT
	MseI_384-barcodes_67	CGATTGAGGCCGGTAATACGACTCACTATAGGGGTTCAGAGTTCTACAGTCCGACGATCNNNNNNNNTCATGAATCAGT
	MseI_384-barcodes_68	CGATTGAGGCCGGTAATACGACTCACTATAGGGGTTCAGAGTTCTACAGTCCGACGATCNNNNNNNNTCGAATTGTCAT
	MseI_384-barcodes_69	CGATTGAGGCCGGTAATACGACTCACTATAGGGGTTCAGAGTTCTACAGTCCGACGATCNNNNNNNNACTGCTGCTGCT
	MseI_384-barcodes_70	CGATTGAGGCCGGTAATACGACTCACTATAGGGGTTCAGAGTTCTACAGTCCGACGATCNNNNNNNNGAGTGACATATT
	MseI_384-barcodes_71	CGATTGAGGCCGGTAATACGACTCACTATAGGGGTTCAGAGTTCTACAGTCCGACGATCNNNNNNNNAATACCGACCGT
	MseI_384-barcodes_72	CGATTGAGGCCGGTAATACGACTCACTATAGGGGTTCAGAGTTCTACAGTCCGACGATCNNNNNNNNCGCTGCCTACAT
	MseI_384-barcodes_73	CGATTGAGGCCGGTAATACGACTCACTATAGGGGTTCAGAGTTCTACAGTCCGACGATCNNNNNNNNCATTCGACGTTT
	MseI_384-barcodes_74	CGATTGAGGCCGGTAATACGACTCACTATAGGGGTTCAGAGTTCTACAGTCCGACGATCNNNNNNNNATGGACCTGTAT
	MseI_384-barcodes_75	CGATTGAGGCCGGTAATACGACTCACTATAGGGGTTCAGAGTTCTACAGTCCGACGATCNNNNNNNNTACTAGCACGAT
	MseI_384-barcodes_76	CGATTGAGGCCGGTAATACGACTCACTATAGGGGTTCAGAGTTCTACAGTCCGACGATCNNNNNNNNTCAATCCGATTT
	MseI_384-barcodes_77	CGATTGAGGCCGGTAATACGACTCACTATAGGGGTTCAGAGTTCTACAGTCCGACGATCNNNNNNNNCCGGCGTCATAT
	MseI_384-barcodes_78	CGATTGAGGCCGGTAATACGACTCACTATAGGGGTTCAGAGTTCTACAGTCCGACGATCNNNNNNNNACGATTGCACCT
	MseI_384-barcodes_79	CGATTGAGGCCGGTAATACGACTCACTATAGGGGTTCAGAGTTCTACAGTCCGACGATCNNNNNNNNACTGTGAATCCT
	MseI_384-barcodes_80	CGATTGAGGCCGGTAATACGACTCACTATAGGGGTTCAGAGTTCTACAGTCCGACGATCNNNNNNNNTTGTACAGATCT
	MseI_384-barcodes_81	CGATTGAGGCCGGTAATACGACTCACTATAGGGGTTCAGAGTTCTACAGTCCGACGATCNNNNNNNNTACTGAGTATCT
	MseI_384-barcodes_82	CGATTGAGGCCGGTAATACGACTCACTATAGGGGTTCAGAGTTCTACAGTCCGACGATCNNNNNNNNGTGTTCTTGCAT
	MseI_384-barcodes_83	CGATTGAGGCCGGTAATACGACTCACTATAGGGGTTCAGAGTTCTACAGTCCGACGATCNNNNNNNNGAAGCGGAGAGT
	MseI_384-barcodes_84	CGATTGAGGCCGGTAATACGACTCACTATAGGGGTTCAGAGTTCTACAGTCCGACGATCNNNNNNNNGGTAGGCGAGTT
	MseI_384-barcodes_85	CGATTGAGGCCGGTAATACGACTCACTATAGGGGTTCAGAGTTCTACAGTCCGACGATCNNNNNNNNGAGAGAATCTCT
	MseI_384-barcodes_86	CGATTGAGGCCGGTAATACGACTCACTATAGGGGTTCAGAGTTCTACAGTCCGACGATCNNNNNNNNAGCACTAAGATT
	MseI_384-barcodes_87	CGATTGAGGCCGGTAATACGACTCACTATAGGGGTTCAGAGTTCTACAGTCCGACGATCNNNNNNNNAGCTATCCGGCT
	MseI_384-barcodes_88	CGATTGAGGCCGGTAATACGACTCACTATAGGGGTTCAGAGTTCTACAGTCCGACGATCNNNNNNNNTCCTTCTAGCGT
	MseI_384-barcodes_89	CGATTGAGGCCGGTAATACGACTCACTATAGGGGTTCAGAGTTCTACAGTCCGACGATCNNNNNNNNGTGGCCTACACT
	MseI_384-barcodes_90	CGATTGAGGCCGGTAATACGACTCACTATAGGGGTTCAGAGTTCTACAGTCCGACGATCNNNNNNNNACCGGAACCTCT
	MseI_384-barcodes_91	CGATTGAGGCCGGTAATACGACTCACTATAGGGGTTCAGAGTTCTACAGTCCGACGATCNNNNNNNNAACGACAGTGGT
	MseI_384-barcodes_92	CGATTGAGGCCGGTAATACGACTCACTATAGGGGTTCAGAGTTCTACAGTCCGACGATCNNNNNNNNCGTCCTGAGGTT
	MseI_384-barcodes_93	CGATTGAGGCCGGTAATACGACTCACTATAGGGGTTCAGAGTTCTACAGTCCGACGATCNNNNNNNNTCTCTGACAATT
	MseI_384-barcodes_94	CGATTGAGGCCGGTAATACGACTCACTATAGGGGTTCAGAGTTCTACAGTCCGACGATCNNNNNNNNATCAATGTTGGT
	MseI_384-barcodes_95	CGATTGAGGCCGGTAATACGACTCACTATAGGGGTTCAGAGTTCTACAGTCCGACGATCNNNNNNNNGTGACTAGCCTT
	MseI_384-barcodes_96	CGATTGAGGCCGGTAATACGACTCACTATAGGGGTTCAGAGTTCTACAGTCCGACGATCNNNNNNNNCGGTTAAGGATT
	MseI_384-barcodes_97	CGATTGAGGCCGGTAATACGACTCACTATAGGGGTTCAGAGTTCTACAGTCCGACGATCNNNNNNNNACTAATCGACGT
	MseI_384-barcodes_98	CGATTGAGGCCGGTAATACGACTCACTATAGGGGTTCAGAGTTCTACAGTCCGACGATCNNNNNNNNAGAGCATTACCT
	MseI_384-barcodes_99	CGATTGAGGCCGGTAATACGACTCACTATAGGGGTTCAGAGTTCTACAGTCCGACGATCNNNNNNNNGACGCGTTAACT
	MseI_384-barcodes_100	CGATTGAGGCCGGTAATACGACTCACTATAGGGGTTCAGAGTTCTACAGTCCGACGATCNNNNNNNNAGAGCTGGCGAT
	MseI_384-barcodes_101	CGATTGAGGCCGGTAATACGACTCACTATAGGGGTTCAGAGTTCTACAGTCCGACGATCNNNNNNNNAATGAGGTGGCT
	MseI_384-barcodes_102	CGATTGAGGCCGGTAATACGACTCACTATAGGGGTTCAGAGTTCTACAGTCCGACGATCNNNNNNNNGACACCAATCTT
	MseI_384-barcodes_103	CGATTGAGGCCGGTAATACGACTCACTATAGGGGTTCAGAGTTCTACAGTCCGACGATCNNNNNNNNCTCTAATACCTT
	MseI_384-barcodes_104	CGATTGAGGCCGGTAATACGACTCACTATAGGGGTTCAGAGTTCTACAGTCCGACGATCNNNNNNNNCCGACGCAGAAT
	MseI_384-barcodes_105	CGATTGAGGCCGGTAATACGACTCACTATAGGGGTTCAGAGTTCTACAGTCCGACGATCNNNNNNNNATAGTTAGAGGT
	MseI_384-barcodes_106	CGATTGAGGCCGGTAATACGACTCACTATAGGGGTTCAGAGTTCTACAGTCCGACGATCNNNNNNNNCACGTGCTACGT
	MseI_384-barcodes_107	CGATTGAGGCCGGTAATACGACTCACTATAGGGGTTCAGAGTTCTACAGTCCGACGATCNNNNNNNNGCTTGGCACCAT
	MseI_384-barcodes_108	CGATTGAGGCCGGTAATACGACTCACTATAGGGGTTCAGAGTTCTACAGTCCGACGATCNNNNNNNNCTACGTACAGAT
	MseI_384-barcodes_109	CGATTGAGGCCGGTAATACGACTCACTATAGGGGTTCAGAGTTCTACAGTCCGACGATCNNNNNNNNACTGCACAACTT
	MseI_384-barcodes_110	CGATTGAGGCCGGTAATACGACTCACTATAGGGGTTCAGAGTTCTACAGTCCGACGATCNNNNNNNNATAATGCCGAGT
	MseI_384-barcodes_111	CGATTGAGGCCGGTAATACGACTCACTATAGGGGTTCAGAGTTCTACAGTCCGACGATCNNNNNNNNCCGAACCTATGT
	MseI_384-barcodes_112	CGATTGAGGCCGGTAATACGACTCACTATAGGGGTTCAGAGTTCTACAGTCCGACGATCNNNNNNNNTTACCAATGGTT
	MseI_384-barcodes_113	CGATTGAGGCCGGTAATACGACTCACTATAGGGGTTCAGAGTTCTACAGTCCGACGATCNNNNNNNNCTATTACAACCT
	MseI_384-barcodes_114	CGATTGAGGCCGGTAATACGACTCACTATAGGGGTTCAGAGTTCTACAGTCCGACGATCNNNNNNNNTAGCGCCAGCAT
	MseI_384-barcodes_115	CGATTGAGGCCGGTAATACGACTCACTATAGGGGTTCAGAGTTCTACAGTCCGACGATCNNNNNNNNGGTAGCACCACT
	MseI_384-barcodes_116	CGATTGAGGCCGGTAATACGACTCACTATAGGGGTTCAGAGTTCTACAGTCCGACGATCNNNNNNNNACACATAGGTTT
	MseI_384-barcodes_117	CGATTGAGGCCGGTAATACGACTCACTATAGGGGTTCAGAGTTCTACAGTCCGACGATCNNNNNNNNTTGGACTCTCGT
	MseI_384-barcodes_118	CGATTGAGGCCGGTAATACGACTCACTATAGGGGTTCAGAGTTCTACAGTCCGACGATCNNNNNNNNTCAACCGATGAT
	MseI_384-barcodes_119	CGATTGAGGCCGGTAATACGACTCACTATAGGGGTTCAGAGTTCTACAGTCCGACGATCNNNNNNNNGCTGGTAATTGT
	MseI_384-barcodes_120	CGATTGAGGCCGGTAATACGACTCACTATAGGGGTTCAGAGTTCTACAGTCCGACGATCNNNNNNNNGTGGTTGTCTCT
	MseI_384-barcodes_121	CGATTGAGGCCGGTAATACGACTCACTATAGGGGTTCAGAGTTCTACAGTCCGACGATCNNNNNNNNGCCATAGAATCT
	MseI_384-barcodes_122	CGATTGAGGCCGGTAATACGACTCACTATAGGGGTTCAGAGTTCTACAGTCCGACGATCNNNNNNNNTGCGTCAGAATT
	MseI_384-barcodes_123	CGATTGAGGCCGGTAATACGACTCACTATAGGGGTTCAGAGTTCTACAGTCCGACGATCNNNNNNNNTGCTCCGACAGT
	MseI_384-barcodes_124	CGATTGAGGCCGGTAATACGACTCACTATAGGGGTTCAGAGTTCTACAGTCCGACGATCNNNNNNNNTACAGTACAGTT
	MseI_384-barcodes_125	CGATTGAGGCCGGTAATACGACTCACTATAGGGGTTCAGAGTTCTACAGTCCGACGATCNNNNNNNNTACATCACCAGT
	MseI_384-barcodes_126	CGATTGAGGCCGGTAATACGACTCACTATAGGGGTTCAGAGTTCTACAGTCCGACGATCNNNNNNNNAGTGCATGTGTT
	MseI_384-barcodes_127	CGATTGAGGCCGGTAATACGACTCACTATAGGGGTTCAGAGTTCTACAGTCCGACGATCNNNNNNNNATCTGACAGAGT
	MseI_384-barcodes_128	CGATTGAGGCCGGTAATACGACTCACTATAGGGGTTCAGAGTTCTACAGTCCGACGATCNNNNNNNNATCGGTTCTACT
	MseI_384-barcodes_129	CGATTGAGGCCGGTAATACGACTCACTATAGGGGTTCAGAGTTCTACAGTCCGACGATCNNNNNNNNGTCAGGATTCCT
	MseI_384-barcodes_130	CGATTGAGGCCGGTAATACGACTCACTATAGGGGTTCAGAGTTCTACAGTCCGACGATCNNNNNNNNCAACAGGTGATT
	MseI_384-barcodes_131	CGATTGAGGCCGGTAATACGACTCACTATAGGGGTTCAGAGTTCTACAGTCCGACGATCNNNNNNNNACGAGGTACAGT
	MseI_384-barcodes_132	CGATTGAGGCCGGTAATACGACTCACTATAGGGGTTCAGAGTTCTACAGTCCGACGATCNNNNNNNNGGCAGCTCGTAT
	MseI_384-barcodes_133	CGATTGAGGCCGGTAATACGACTCACTATAGGGGTTCAGAGTTCTACAGTCCGACGATCNNNNNNNNAAGGTACCTGGT
	MseI_384-barcodes_134	CGATTGAGGCCGGTAATACGACTCACTATAGGGGTTCAGAGTTCTACAGTCCGACGATCNNNNNNNNACGCAGAATTAT
	MseI_384-barcodes_135	CGATTGAGGCCGGTAATACGACTCACTATAGGGGTTCAGAGTTCTACAGTCCGACGATCNNNNNNNNGCCTATGCTACT
	MseI_384-barcodes_136	CGATTGAGGCCGGTAATACGACTCACTATAGGGGTTCAGAGTTCTACAGTCCGACGATCNNNNNNNNAATGTAAGGCGT
	MseI_384-barcodes_137	CGATTGAGGCCGGTAATACGACTCACTATAGGGGTTCAGAGTTCTACAGTCCGACGATCNNNNNNNNCGGTATCGAACT
	MseI_384-barcodes_138	CGATTGAGGCCGGTAATACGACTCACTATAGGGGTTCAGAGTTCTACAGTCCGACGATCNNNNNNNNGCCGAAGGAGAT
	MseI_384-barcodes_139	CGATTGAGGCCGGTAATACGACTCACTATAGGGGTTCAGAGTTCTACAGTCCGACGATCNNNNNNNNTTCGCCGGTGTT
	MseI_384-barcodes_140	CGATTGAGGCCGGTAATACGACTCACTATAGGGGTTCAGAGTTCTACAGTCCGACGATCNNNNNNNNGGAATGCTGTTT
	MseI_384-barcodes_141	CGATTGAGGCCGGTAATACGACTCACTATAGGGGTTCAGAGTTCTACAGTCCGACGATCNNNNNNNNAAGTCTAGGTGT
	MseI_384-barcodes_142	CGATTGAGGCCGGTAATACGACTCACTATAGGGGTTCAGAGTTCTACAGTCCGACGATCNNNNNNNNGTGTGGATATGT
	MseI_384-barcodes_143	CGATTGAGGCCGGTAATACGACTCACTATAGGGGTTCAGAGTTCTACAGTCCGACGATCNNNNNNNNGTAATCCACCAT
	MseI_384-barcodes_144	CGATTGAGGCCGGTAATACGACTCACTATAGGGGTTCAGAGTTCTACAGTCCGACGATCNNNNNNNNATCGTGAGCCAT
	MseI_384-barcodes_145	CGATTGAGGCCGGTAATACGACTCACTATAGGGGTTCAGAGTTCTACAGTCCGACGATCNNNNNNNNGCGTACCTTCTT
	MseI_384-barcodes_146	CGATTGAGGCCGGTAATACGACTCACTATAGGGGTTCAGAGTTCTACAGTCCGACGATCNNNNNNNNCTTGGCGCATTT
	MseI_384-barcodes_147	CGATTGAGGCCGGTAATACGACTCACTATAGGGGTTCAGAGTTCTACAGTCCGACGATCNNNNNNNNCTCATCGATAAT
	MseI_384-barcodes_148	CGATTGAGGCCGGTAATACGACTCACTATAGGGGTTCAGAGTTCTACAGTCCGACGATCNNNNNNNNTTCCGTGTGATT
	MseI_384-barcodes_149	CGATTGAGGCCGGTAATACGACTCACTATAGGGGTTCAGAGTTCTACAGTCCGACGATCNNNNNNNNGTACTACCTTGT
	MseI_384-barcodes_150	CGATTGAGGCCGGTAATACGACTCACTATAGGGGTTCAGAGTTCTACAGTCCGACGATCNNNNNNNNCGTCGCAGTATT
	MseI_384-barcodes_151	CGATTGAGGCCGGTAATACGACTCACTATAGGGGTTCAGAGTTCTACAGTCCGACGATCNNNNNNNNACCATACTGACT
	MseI_384-barcodes_152	CGATTGAGGCCGGTAATACGACTCACTATAGGGGTTCAGAGTTCTACAGTCCGACGATCNNNNNNNNCCTGTCGAGTGT
	MseI_384-barcodes_153	CGATTGAGGCCGGTAATACGACTCACTATAGGGGTTCAGAGTTCTACAGTCCGACGATCNNNNNNNNTTCTGGCGAGCT
	MseI_384-barcodes_154	CGATTGAGGCCGGTAATACGACTCACTATAGGGGTTCAGAGTTCTACAGTCCGACGATCNNNNNNNNCGTGGTGACTAT
	MseI_384-barcodes_155	CGATTGAGGCCGGTAATACGACTCACTATAGGGGTTCAGAGTTCTACAGTCCGACGATCNNNNNNNNTATGGCTACTGT
	MseI_384-barcodes_156	CGATTGAGGCCGGTAATACGACTCACTATAGGGGTTCAGAGTTCTACAGTCCGACGATCNNNNNNNNCGTACCTCTCGT
	MseI_384-barcodes_157	CGATTGAGGCCGGTAATACGACTCACTATAGGGGTTCAGAGTTCTACAGTCCGACGATCNNNNNNNNAATGCGCGCACT
	MseI_384-barcodes_158	CGATTGAGGCCGGTAATACGACTCACTATAGGGGTTCAGAGTTCTACAGTCCGACGATCNNNNNNNNTGCTCTTAAGAT
	MseI_384-barcodes_159	CGATTGAGGCCGGTAATACGACTCACTATAGGGGTTCAGAGTTCTACAGTCCGACGATCNNNNNNNNGAGCAATGCCAT
	MseI_384-barcodes_160	CGATTGAGGCCGGTAATACGACTCACTATAGGGGTTCAGAGTTCTACAGTCCGACGATCNNNNNNNNTGCTTCCGGTCT
	MseI_384-barcodes_161	CGATTGAGGCCGGTAATACGACTCACTATAGGGGTTCAGAGTTCTACAGTCCGACGATCNNNNNNNNTGTGCATACCAT
	MseI_384-barcodes_162	CGATTGAGGCCGGTAATACGACTCACTATAGGGGTTCAGAGTTCTACAGTCCGACGATCNNNNNNNNACACCAAGAGCT
	MseI_384-barcodes_163	CGATTGAGGCCGGTAATACGACTCACTATAGGGGTTCAGAGTTCTACAGTCCGACGATCNNNNNNNNTACACTCGACAT
	MseI_384-barcodes_164	CGATTGAGGCCGGTAATACGACTCACTATAGGGGTTCAGAGTTCTACAGTCCGACGATCNNNNNNNNCTAGAAGCCATT
	MseI_384-barcodes_165	CGATTGAGGCCGGTAATACGACTCACTATAGGGGTTCAGAGTTCTACAGTCCGACGATCNNNNNNNNTGGATCCACGGT
	MseI_384-barcodes_166	CGATTGAGGCCGGTAATACGACTCACTATAGGGGTTCAGAGTTCTACAGTCCGACGATCNNNNNNNNAGTAAGGCGCGT
	MseI_384-barcodes_167	CGATTGAGGCCGGTAATACGACTCACTATAGGGGTTCAGAGTTCTACAGTCCGACGATCNNNNNNNNAGTCTAACTTCT
	MseI_384-barcodes_168	CGATTGAGGCCGGTAATACGACTCACTATAGGGGTTCAGAGTTCTACAGTCCGACGATCNNNNNNNNCATATGTCATCT
	MseI_384-barcodes_169	CGATTGAGGCCGGTAATACGACTCACTATAGGGGTTCAGAGTTCTACAGTCCGACGATCNNNNNNNNTGGCCAGCTAAT
	MseI_384-barcodes_170	CGATTGAGGCCGGTAATACGACTCACTATAGGGGTTCAGAGTTCTACAGTCCGACGATCNNNNNNNNTAGTCGGCACCT
	MseI_384-barcodes_171	CGATTGAGGCCGGTAATACGACTCACTATAGGGGTTCAGAGTTCTACAGTCCGACGATCNNNNNNNNTGTCTTGGTTAT
	MseI_384-barcodes_172	CGATTGAGGCCGGTAATACGACTCACTATAGGGGTTCAGAGTTCTACAGTCCGACGATCNNNNNNNNAATTAAGCCTGT
	MseI_384-barcodes_173	CGATTGAGGCCGGTAATACGACTCACTATAGGGGTTCAGAGTTCTACAGTCCGACGATCNNNNNNNNCCTTGTCTCTGT
	MseI_384-barcodes_174	CGATTGAGGCCGGTAATACGACTCACTATAGGGGTTCAGAGTTCTACAGTCCGACGATCNNNNNNNNAATCGCTCCGCT
	MseI_384-barcodes_175	CGATTGAGGCCGGTAATACGACTCACTATAGGGGTTCAGAGTTCTACAGTCCGACGATCNNNNNNNNATCATCGCGCTT
	MseI_384-barcodes_176	CGATTGAGGCCGGTAATACGACTCACTATAGGGGTTCAGAGTTCTACAGTCCGACGATCNNNNNNNNGCTACACACAGT
	MseI_384-barcodes_177	CGATTGAGGCCGGTAATACGACTCACTATAGGGGTTCAGAGTTCTACAGTCCGACGATCNNNNNNNNTCTCCAAGCTTT
	MseI_384-barcodes_178	CGATTGAGGCCGGTAATACGACTCACTATAGGGGTTCAGAGTTCTACAGTCCGACGATCNNNNNNNNCAATTCACGCCT
	MseI_384-barcodes_179	CGATTGAGGCCGGTAATACGACTCACTATAGGGGTTCAGAGTTCTACAGTCCGACGATCNNNNNNNNGCTAGCGTGTTT
	MseI_384-barcodes_180	CGATTGAGGCCGGTAATACGACTCACTATAGGGGTTCAGAGTTCTACAGTCCGACGATCNNNNNNNNGCCATTACGAAT
	MseI_384-barcodes_181	CGATTGAGGCCGGTAATACGACTCACTATAGGGGTTCAGAGTTCTACAGTCCGACGATCNNNNNNNNAGCTTGCTCATT
	MseI_384-barcodes_182	CGATTGAGGCCGGTAATACGACTCACTATAGGGGTTCAGAGTTCTACAGTCCGACGATCNNNNNNNNGTGGTGCAGGAT
	MseI_384-barcodes_183	CGATTGAGGCCGGTAATACGACTCACTATAGGGGTTCAGAGTTCTACAGTCCGACGATCNNNNNNNNCGTGAGTAAGGT
	MseI_384-barcodes_184	CGATTGAGGCCGGTAATACGACTCACTATAGGGGTTCAGAGTTCTACAGTCCGACGATCNNNNNNNNCACCACGACTCT
	MseI_384-barcodes_185	CGATTGAGGCCGGTAATACGACTCACTATAGGGGTTCAGAGTTCTACAGTCCGACGATCNNNNNNNNATTCCGTAGGCT
	MseI_384-barcodes_186	CGATTGAGGCCGGTAATACGACTCACTATAGGGGTTCAGAGTTCTACAGTCCGACGATCNNNNNNNNTTACTTCTCGGT
	MseI_384-barcodes_187	CGATTGAGGCCGGTAATACGACTCACTATAGGGGTTCAGAGTTCTACAGTCCGACGATCNNNNNNNNAAGCTCGCCAAT
	MseI_384-barcodes_188	CGATTGAGGCCGGTAATACGACTCACTATAGGGGTTCAGAGTTCTACAGTCCGACGATCNNNNNNNNGGCCGATACAGT
	MseI_384-barcodes_189	CGATTGAGGCCGGTAATACGACTCACTATAGGGGTTCAGAGTTCTACAGTCCGACGATCNNNNNNNNTTACATTCGCAT
	MseI_384-barcodes_190	CGATTGAGGCCGGTAATACGACTCACTATAGGGGTTCAGAGTTCTACAGTCCGACGATCNNNNNNNNCGAACTAGTCAT
	MseI_384-barcodes_191	CGATTGAGGCCGGTAATACGACTCACTATAGGGGTTCAGAGTTCTACAGTCCGACGATCNNNNNNNNGCACTCTAGGTT
	MseI_384-barcodes_192	CGATTGAGGCCGGTAATACGACTCACTATAGGGGTTCAGAGTTCTACAGTCCGACGATCNNNNNNNNACCTTCGGATAT
	MseI_384-barcodes_193	CGATTGAGGCCGGTAATACGACTCACTATAGGGGTTCAGAGTTCTACAGTCCGACGATCNNNNNNNNTGTCCGCTACTT
	MseI_384-barcodes_194	CGATTGAGGCCGGTAATACGACTCACTATAGGGGTTCAGAGTTCTACAGTCCGACGATCNNNNNNNNTCGGTGGATAGT
	MseI_384-barcodes_195	CGATTGAGGCCGGTAATACGACTCACTATAGGGGTTCAGAGTTCTACAGTCCGACGATCNNNNNNNNTTAGGAGCGTGT
	MseI_384-barcodes_196	CGATTGAGGCCGGTAATACGACTCACTATAGGGGTTCAGAGTTCTACAGTCCGACGATCNNNNNNNNGTATGCGCTTAT
	MseI_384-barcodes_197	CGATTGAGGCCGGTAATACGACTCACTATAGGGGTTCAGAGTTCTACAGTCCGACGATCNNNNNNNNGTATTGTGAACT
	MseI_384-barcodes_198	CGATTGAGGCCGGTAATACGACTCACTATAGGGGTTCAGAGTTCTACAGTCCGACGATCNNNNNNNNGTATCACTCTAT
	MseI_384-barcodes_199	CGATTGAGGCCGGTAATACGACTCACTATAGGGGTTCAGAGTTCTACAGTCCGACGATCNNNNNNNNGAAGAGTCCGTT
	MseI_384-barcodes_200	CGATTGAGGCCGGTAATACGACTCACTATAGGGGTTCAGAGTTCTACAGTCCGACGATCNNNNNNNNATCTTCAACTCT
	MseI_384-barcodes_201	CGATTGAGGCCGGTAATACGACTCACTATAGGGGTTCAGAGTTCTACAGTCCGACGATCNNNNNNNNACCACGACTTGT
	MseI_384-barcodes_202	CGATTGAGGCCGGTAATACGACTCACTATAGGGGTTCAGAGTTCTACAGTCCGACGATCNNNNNNNNCTCTATAGCTAT
	MseI_384-barcodes_203	CGATTGAGGCCGGTAATACGACTCACTATAGGGGTTCAGAGTTCTACAGTCCGACGATCNNNNNNNNCTGTAAGAGACT
	MseI_384-barcodes_204	CGATTGAGGCCGGTAATACGACTCACTATAGGGGTTCAGAGTTCTACAGTCCGACGATCNNNNNNNNGAACGAAGCGGT
	MseI_384-barcodes_205	CGATTGAGGCCGGTAATACGACTCACTATAGGGGTTCAGAGTTCTACAGTCCGACGATCNNNNNNNNACGAGTCTGGAT
	MseI_384-barcodes_206	CGATTGAGGCCGGTAATACGACTCACTATAGGGGTTCAGAGTTCTACAGTCCGACGATCNNNNNNNNGATTGTCCAGAT
	MseI_384-barcodes_207	CGATTGAGGCCGGTAATACGACTCACTATAGGGGTTCAGAGTTCTACAGTCCGACGATCNNNNNNNNCCACTCGTAGCT
	MseI_384-barcodes_208	CGATTGAGGCCGGTAATACGACTCACTATAGGGGTTCAGAGTTCTACAGTCCGACGATCNNNNNNNNTAAGACGCATCT
	MseI_384-barcodes_209	CGATTGAGGCCGGTAATACGACTCACTATAGGGGTTCAGAGTTCTACAGTCCGACGATCNNNNNNNNCAGTACTCGATT
	MseI_384-barcodes_210	CGATTGAGGCCGGTAATACGACTCACTATAGGGGTTCAGAGTTCTACAGTCCGACGATCNNNNNNNNAGTTGGTGGATT
	MseI_384-barcodes_211	CGATTGAGGCCGGTAATACGACTCACTATAGGGGTTCAGAGTTCTACAGTCCGACGATCNNNNNNNNGACCTTGGACTT
	MseI_384-barcodes_212	CGATTGAGGCCGGTAATACGACTCACTATAGGGGTTCAGAGTTCTACAGTCCGACGATCNNNNNNNNTAACTACCAGAT
	MseI_384-barcodes_213	CGATTGAGGCCGGTAATACGACTCACTATAGGGGTTCAGAGTTCTACAGTCCGACGATCNNNNNNNNACCGAGCGTCTT
	MseI_384-barcodes_214	CGATTGAGGCCGGTAATACGACTCACTATAGGGGTTCAGAGTTCTACAGTCCGACGATCNNNNNNNNTATGAAGACGTT
	MseI_384-barcodes_215	CGATTGAGGCCGGTAATACGACTCACTATAGGGGTTCAGAGTTCTACAGTCCGACGATCNNNNNNNNATATCGTCTGGT
	MseI_384-barcodes_216	CGATTGAGGCCGGTAATACGACTCACTATAGGGGTTCAGAGTTCTACAGTCCGACGATCNNNNNNNNCAATACAGAGTT
	MseI_384-barcodes_217	CGATTGAGGCCGGTAATACGACTCACTATAGGGGTTCAGAGTTCTACAGTCCGACGATCNNNNNNNNCGCACGTTCTGT
	MseI_384-barcodes_218	CGATTGAGGCCGGTAATACGACTCACTATAGGGGTTCAGAGTTCTACAGTCCGACGATCNNNNNNNNGGATATGTCCGT
	MseI_384-barcodes_219	CGATTGAGGCCGGTAATACGACTCACTATAGGGGTTCAGAGTTCTACAGTCCGACGATCNNNNNNNNTCGACATCTGTT
	MseI_384-barcodes_220	CGATTGAGGCCGGTAATACGACTCACTATAGGGGTTCAGAGTTCTACAGTCCGACGATCNNNNNNNNAGAGACGACACT
	MseI_384-barcodes_221	CGATTGAGGCCGGTAATACGACTCACTATAGGGGTTCAGAGTTCTACAGTCCGACGATCNNNNNNNNTCACAACATAGT
	MseI_384-barcodes_222	CGATTGAGGCCGGTAATACGACTCACTATAGGGGTTCAGAGTTCTACAGTCCGACGATCNNNNNNNNCTGAGTGATGTT
	MseI_384-barcodes_223	CGATTGAGGCCGGTAATACGACTCACTATAGGGGTTCAGAGTTCTACAGTCCGACGATCNNNNNNNNCACTGGAATTAT
	MseI_384-barcodes_224	CGATTGAGGCCGGTAATACGACTCACTATAGGGGTTCAGAGTTCTACAGTCCGACGATCNNNNNNNNTGCGAGCAGTTT
	MseI_384-barcodes_225	CGATTGAGGCCGGTAATACGACTCACTATAGGGGTTCAGAGTTCTACAGTCCGACGATCNNNNNNNNTGAGTTCATACT
	MseI_384-barcodes_226	CGATTGAGGCCGGTAATACGACTCACTATAGGGGTTCAGAGTTCTACAGTCCGACGATCNNNNNNNNTAGGTATGAAGT
	MseI_384-barcodes_227	CGATTGAGGCCGGTAATACGACTCACTATAGGGGTTCAGAGTTCTACAGTCCGACGATCNNNNNNNNCTTGCTATGCTT
	MseI_384-barcodes_228	CGATTGAGGCCGGTAATACGACTCACTATAGGGGTTCAGAGTTCTACAGTCCGACGATCNNNNNNNNCAAGCGCATGTT
	MseI_384-barcodes_229	CGATTGAGGCCGGTAATACGACTCACTATAGGGGTTCAGAGTTCTACAGTCCGACGATCNNNNNNNNTGTTACGTACCT
	MseI_384-barcodes_230	CGATTGAGGCCGGTAATACGACTCACTATAGGGGTTCAGAGTTCTACAGTCCGACGATCNNNNNNNNTCATGGTACGTT
	MseI_384-barcodes_231	CGATTGAGGCCGGTAATACGACTCACTATAGGGGTTCAGAGTTCTACAGTCCGACGATCNNNNNNNNCGGTTGGTGTAT
	MseI_384-barcodes_232	CGATTGAGGCCGGTAATACGACTCACTATAGGGGTTCAGAGTTCTACAGTCCGACGATCNNNNNNNNATAGTATCGGCT
	MseI_384-barcodes_233	CGATTGAGGCCGGTAATACGACTCACTATAGGGGTTCAGAGTTCTACAGTCCGACGATCNNNNNNNNTTAAGTCGGCGT
	MseI_384-barcodes_234	CGATTGAGGCCGGTAATACGACTCACTATAGGGGTTCAGAGTTCTACAGTCCGACGATCNNNNNNNNCATATTCGTTGT
	MseI_384-barcodes_235	CGATTGAGGCCGGTAATACGACTCACTATAGGGGTTCAGAGTTCTACAGTCCGACGATCNNNNNNNNACCGTGCACTGT
	MseI_384-barcodes_236	CGATTGAGGCCGGTAATACGACTCACTATAGGGGTTCAGAGTTCTACAGTCCGACGATCNNNNNNNNTACGAATCGGAT
	MseI_384-barcodes_237	CGATTGAGGCCGGTAATACGACTCACTATAGGGGTTCAGAGTTCTACAGTCCGACGATCNNNNNNNNCCTGTTAGTAAT
	MseI_384-barcodes_238	CGATTGAGGCCGGTAATACGACTCACTATAGGGGTTCAGAGTTCTACAGTCCGACGATCNNNNNNNNTGGAGACGGTAT
	MseI_384-barcodes_239	CGATTGAGGCCGGTAATACGACTCACTATAGGGGTTCAGAGTTCTACAGTCCGACGATCNNNNNNNNTCGTGTAGGCCT
	MseI_384-barcodes_240	CGATTGAGGCCGGTAATACGACTCACTATAGGGGTTCAGAGTTCTACAGTCCGACGATCNNNNNNNNCAATATGGTTCT
	MseI_384-barcodes_241	CGATTGAGGCCGGTAATACGACTCACTATAGGGGTTCAGAGTTCTACAGTCCGACGATCNNNNNNNNCCGTCTTCCAGT
	MseI_384-barcodes_242	CGATTGAGGCCGGTAATACGACTCACTATAGGGGTTCAGAGTTCTACAGTCCGACGATCNNNNNNNNGAACATGAGGCT
	MseI_384-barcodes_243	CGATTGAGGCCGGTAATACGACTCACTATAGGGGTTCAGAGTTCTACAGTCCGACGATCNNNNNNNNGTCTCGGACGTT
	MseI_384-barcodes_244	CGATTGAGGCCGGTAATACGACTCACTATAGGGGTTCAGAGTTCTACAGTCCGACGATCNNNNNNNNGTTGCGTCACTT
	MseI_384-barcodes_245	CGATTGAGGCCGGTAATACGACTCACTATAGGGGTTCAGAGTTCTACAGTCCGACGATCNNNNNNNNCGCTATTGGCGT
	MseI_384-barcodes_246	CGATTGAGGCCGGTAATACGACTCACTATAGGGGTTCAGAGTTCTACAGTCCGACGATCNNNNNNNNATCAGATTCGTT
	MseI_384-barcodes_247	CGATTGAGGCCGGTAATACGACTCACTATAGGGGTTCAGAGTTCTACAGTCCGACGATCNNNNNNNNTGACGTCGAATT
	MseI_384-barcodes_248	CGATTGAGGCCGGTAATACGACTCACTATAGGGGTTCAGAGTTCTACAGTCCGACGATCNNNNNNNNGATATCCTCGCT
	MseI_384-barcodes_249	CGATTGAGGCCGGTAATACGACTCACTATAGGGGTTCAGAGTTCTACAGTCCGACGATCNNNNNNNNCGCGTGACTACT
	MseI_384-barcodes_250	CGATTGAGGCCGGTAATACGACTCACTATAGGGGTTCAGAGTTCTACAGTCCGACGATCNNNNNNNNGCGGAATGTATT
	MseI_384-barcodes_251	CGATTGAGGCCGGTAATACGACTCACTATAGGGGTTCAGAGTTCTACAGTCCGACGATCNNNNNNNNGTATACCGGCCT
	MseI_384-barcodes_252	CGATTGAGGCCGGTAATACGACTCACTATAGGGGTTCAGAGTTCTACAGTCCGACGATCNNNNNNNNGTCCTTCAGCGT
	MseI_384-barcodes_253	CGATTGAGGCCGGTAATACGACTCACTATAGGGGTTCAGAGTTCTACAGTCCGACGATCNNNNNNNNCGACTTCCGTAT
	MseI_384-barcodes_254	CGATTGAGGCCGGTAATACGACTCACTATAGGGGTTCAGAGTTCTACAGTCCGACGATCNNNNNNNNCACGAGACCTGT
	MseI_384-barcodes_255	CGATTGAGGCCGGTAATACGACTCACTATAGGGGTTCAGAGTTCTACAGTCCGACGATCNNNNNNNNTCGGCTAACCGT
	MseI_384-barcodes_256	CGATTGAGGCCGGTAATACGACTCACTATAGGGGTTCAGAGTTCTACAGTCCGACGATCNNNNNNNNGCAAGCACTGGT
	MseI_384-barcodes_257	CGATTGAGGCCGGTAATACGACTCACTATAGGGGTTCAGAGTTCTACAGTCCGACGATCNNNNNNNNTAGTGGCGCCTT
	MseI_384-barcodes_258	CGATTGAGGCCGGTAATACGACTCACTATAGGGGTTCAGAGTTCTACAGTCCGACGATCNNNNNNNNGCACTCCTTAAT
	MseI_384-barcodes_259	CGATTGAGGCCGGTAATACGACTCACTATAGGGGTTCAGAGTTCTACAGTCCGACGATCNNNNNNNNGACTCCTGCTCT
	MseI_384-barcodes_260	CGATTGAGGCCGGTAATACGACTCACTATAGGGGTTCAGAGTTCTACAGTCCGACGATCNNNNNNNNAGTGGCCGATAT
	MseI_384-barcodes_261	CGATTGAGGCCGGTAATACGACTCACTATAGGGGTTCAGAGTTCTACAGTCCGACGATCNNNNNNNNGCATCATCTAAT
	MseI_384-barcodes_262	CGATTGAGGCCGGTAATACGACTCACTATAGGGGTTCAGAGTTCTACAGTCCGACGATCNNNNNNNNGGCACACGTACT
	MseI_384-barcodes_263	CGATTGAGGCCGGTAATACGACTCACTATAGGGGTTCAGAGTTCTACAGTCCGACGATCNNNNNNNNCAACGTGATCAT
	MseI_384-barcodes_264	CGATTGAGGCCGGTAATACGACTCACTATAGGGGTTCAGAGTTCTACAGTCCGACGATCNNNNNNNNTCTTCGACTGAT
	MseI_384-barcodes_265	CGATTGAGGCCGGTAATACGACTCACTATAGGGGTTCAGAGTTCTACAGTCCGACGATCNNNNNNNNGTTCTGGAATGT
	MseI_384-barcodes_266	CGATTGAGGCCGGTAATACGACTCACTATAGGGGTTCAGAGTTCTACAGTCCGACGATCNNNNNNNNCGTTCTAGCGGT
	MseI_384-barcodes_267	CGATTGAGGCCGGTAATACGACTCACTATAGGGGTTCAGAGTTCTACAGTCCGACGATCNNNNNNNNGCGCAAGTATTT
	MseI_384-barcodes_268	CGATTGAGGCCGGTAATACGACTCACTATAGGGGTTCAGAGTTCTACAGTCCGACGATCNNNNNNNNCATAGATGAGAT
	MseI_384-barcodes_269	CGATTGAGGCCGGTAATACGACTCACTATAGGGGTTCAGAGTTCTACAGTCCGACGATCNNNNNNNNAACAGAGTGCAT
	MseI_384-barcodes_270	CGATTGAGGCCGGTAATACGACTCACTATAGGGGTTCAGAGTTCTACAGTCCGACGATCNNNNNNNNACCAAGATCAAT
	MseI_384-barcodes_271	CGATTGAGGCCGGTAATACGACTCACTATAGGGGTTCAGAGTTCTACAGTCCGACGATCNNNNNNNNGTTGCAACTAGT
	MseI_384-barcodes_272	CGATTGAGGCCGGTAATACGACTCACTATAGGGGTTCAGAGTTCTACAGTCCGACGATCNNNNNNNNAGGAACAATGTT
	MseI_384-barcodes_273	CGATTGAGGCCGGTAATACGACTCACTATAGGGGTTCAGAGTTCTACAGTCCGACGATCNNNNNNNNTAGATGAGGCAT
	MseI_384-barcodes_274	CGATTGAGGCCGGTAATACGACTCACTATAGGGGTTCAGAGTTCTACAGTCCGACGATCNNNNNNNNCCAATTGTCCAT
	MseI_384-barcodes_275	CGATTGAGGCCGGTAATACGACTCACTATAGGGGTTCAGAGTTCTACAGTCCGACGATCNNNNNNNNGCACAATCGTCT
	MseI_384-barcodes_276	CGATTGAGGCCGGTAATACGACTCACTATAGGGGTTCAGAGTTCTACAGTCCGACGATCNNNNNNNNAGTCACTAGAAT
	MseI_384-barcodes_277	CGATTGAGGCCGGTAATACGACTCACTATAGGGGTTCAGAGTTCTACAGTCCGACGATCNNNNNNNNAGTGACACAGCT
	MseI_384-barcodes_278	CGATTGAGGCCGGTAATACGACTCACTATAGGGGTTCAGAGTTCTACAGTCCGACGATCNNNNNNNNAAGTCTGATACT
	MseI_384-barcodes_279	CGATTGAGGCCGGTAATACGACTCACTATAGGGGTTCAGAGTTCTACAGTCCGACGATCNNNNNNNNAAGAATTCCTCT
	MseI_384-barcodes_280	CGATTGAGGCCGGTAATACGACTCACTATAGGGGTTCAGAGTTCTACAGTCCGACGATCNNNNNNNNCGGTGGTCTGAT
	MseI_384-barcodes_281	CGATTGAGGCCGGTAATACGACTCACTATAGGGGTTCAGAGTTCTACAGTCCGACGATCNNNNNNNNCGAGTGTTAATT
	MseI_384-barcodes_282	CGATTGAGGCCGGTAATACGACTCACTATAGGGGTTCAGAGTTCTACAGTCCGACGATCNNNNNNNNTGAATAGGAGCT
	MseI_384-barcodes_283	CGATTGAGGCCGGTAATACGACTCACTATAGGGGTTCAGAGTTCTACAGTCCGACGATCNNNNNNNNAGCAGCTAACCT
	MseI_384-barcodes_284	CGATTGAGGCCGGTAATACGACTCACTATAGGGGTTCAGAGTTCTACAGTCCGACGATCNNNNNNNNAGACTAGTCTAT
	MseI_384-barcodes_285	CGATTGAGGCCGGTAATACGACTCACTATAGGGGTTCAGAGTTCTACAGTCCGACGATCNNNNNNNNGATTGATCTCCT
	MseI_384-barcodes_286	CGATTGAGGCCGGTAATACGACTCACTATAGGGGTTCAGAGTTCTACAGTCCGACGATCNNNNNNNNCATTAATGCACT
	MseI_384-barcodes_287	CGATTGAGGCCGGTAATACGACTCACTATAGGGGTTCAGAGTTCTACAGTCCGACGATCNNNNNNNNTACGACTTCCTT
	MseI_384-barcodes_288	CGATTGAGGCCGGTAATACGACTCACTATAGGGGTTCAGAGTTCTACAGTCCGACGATCNNNNNNNNTTCACAATCACT
	MseI_384-barcodes_289	CGATTGAGGCCGGTAATACGACTCACTATAGGGGTTCAGAGTTCTACAGTCCGACGATCNNNNNNNNTTCCTAGGCCGT
	MseI_384-barcodes_290	CGATTGAGGCCGGTAATACGACTCACTATAGGGGTTCAGAGTTCTACAGTCCGACGATCNNNNNNNNTGGAAGTGGAGT
	MseI_384-barcodes_291	CGATTGAGGCCGGTAATACGACTCACTATAGGGGTTCAGAGTTCTACAGTCCGACGATCNNNNNNNNAGCGATGAACGT
	MseI_384-barcodes_292	CGATTGAGGCCGGTAATACGACTCACTATAGGGGTTCAGAGTTCTACAGTCCGACGATCNNNNNNNNACGCTGCGATCT
	MseI_384-barcodes_293	CGATTGAGGCCGGTAATACGACTCACTATAGGGGTTCAGAGTTCTACAGTCCGACGATCNNNNNNNNCTCACTAGAGCT
	MseI_384-barcodes_294	CGATTGAGGCCGGTAATACGACTCACTATAGGGGTTCAGAGTTCTACAGTCCGACGATCNNNNNNNNATACGGATAACT
	MseI_384-barcodes_295	CGATTGAGGCCGGTAATACGACTCACTATAGGGGTTCAGAGTTCTACAGTCCGACGATCNNNNNNNNCGATTGGACCTT
	MseI_384-barcodes_296	CGATTGAGGCCGGTAATACGACTCACTATAGGGGTTCAGAGTTCTACAGTCCGACGATCNNNNNNNNCTGATAAGCGAT
	MseI_384-barcodes_297	CGATTGAGGCCGGTAATACGACTCACTATAGGGGTTCAGAGTTCTACAGTCCGACGATCNNNNNNNNTTATGGATGCAT
	MseI_384-barcodes_298	CGATTGAGGCCGGTAATACGACTCACTATAGGGGTTCAGAGTTCTACAGTCCGACGATCNNNNNNNNTGTGATCTGCAT
	MseI_384-barcodes_299	CGATTGAGGCCGGTAATACGACTCACTATAGGGGTTCAGAGTTCTACAGTCCGACGATCNNNNNNNNTCTTGCGCCAAT
	MseI_384-barcodes_300	CGATTGAGGCCGGTAATACGACTCACTATAGGGGTTCAGAGTTCTACAGTCCGACGATCNNNNNNNNTTGGCGACCATT
	MseI_384-barcodes_301	CGATTGAGGCCGGTAATACGACTCACTATAGGGGTTCAGAGTTCTACAGTCCGACGATCNNNNNNNNACTCGGTTGTAT
	MseI_384-barcodes_302	CGATTGAGGCCGGTAATACGACTCACTATAGGGGTTCAGAGTTCTACAGTCCGACGATCNNNNNNNNGTACCGGTACAT
	MseI_384-barcodes_303	CGATTGAGGCCGGTAATACGACTCACTATAGGGGTTCAGAGTTCTACAGTCCGACGATCNNNNNNNNTGGCGTATCAAT
	MseI_384-barcodes_304	CGATTGAGGCCGGTAATACGACTCACTATAGGGGTTCAGAGTTCTACAGTCCGACGATCNNNNNNNNGGCTAGCATCGT
	MseI_384-barcodes_305	CGATTGAGGCCGGTAATACGACTCACTATAGGGGTTCAGAGTTCTACAGTCCGACGATCNNNNNNNNCTTAAGCATAGT
	MseI_384-barcodes_306	CGATTGAGGCCGGTAATACGACTCACTATAGGGGTTCAGAGTTCTACAGTCCGACGATCNNNNNNNNGACTAGAGGAAT
	MseI_384-barcodes_307	CGATTGAGGCCGGTAATACGACTCACTATAGGGGTTCAGAGTTCTACAGTCCGACGATCNNNNNNNNTGAAGATCCATT
	MseI_384-barcodes_308	CGATTGAGGCCGGTAATACGACTCACTATAGGGGTTCAGAGTTCTACAGTCCGACGATCNNNNNNNNCAAGCAATGACT
	MseI_384-barcodes_309	CGATTGAGGCCGGTAATACGACTCACTATAGGGGTTCAGAGTTCTACAGTCCGACGATCNNNNNNNNCGCAATGTCATT
	MseI_384-barcodes_310	CGATTGAGGCCGGTAATACGACTCACTATAGGGGTTCAGAGTTCTACAGTCCGACGATCNNNNNNNNTGAATCGTGCGT
	MseI_384-barcodes_311	CGATTGAGGCCGGTAATACGACTCACTATAGGGGTTCAGAGTTCTACAGTCCGACGATCNNNNNNNNGCAGATCACAAT
	MseI_384-barcodes_312	CGATTGAGGCCGGTAATACGACTCACTATAGGGGTTCAGAGTTCTACAGTCCGACGATCNNNNNNNNCAGACACGCTTT
	MseI_384-barcodes_313	CGATTGAGGCCGGTAATACGACTCACTATAGGGGTTCAGAGTTCTACAGTCCGACGATCNNNNNNNNAAGACATACGAT
	MseI_384-barcodes_314	CGATTGAGGCCGGTAATACGACTCACTATAGGGGTTCAGAGTTCTACAGTCCGACGATCNNNNNNNNAGGACCGCATTT
	MseI_384-barcodes_315	CGATTGAGGCCGGTAATACGACTCACTATAGGGGTTCAGAGTTCTACAGTCCGACGATCNNNNNNNNTGTAAGAACTGT
	MseI_384-barcodes_316	CGATTGAGGCCGGTAATACGACTCACTATAGGGGTTCAGAGTTCTACAGTCCGACGATCNNNNNNNNTCTAGTGAACTT
	MseI_384-barcodes_317	CGATTGAGGCCGGTAATACGACTCACTATAGGGGTTCAGAGTTCTACAGTCCGACGATCNNNNNNNNGTTGTACACTTT
	MseI_384-barcodes_318	CGATTGAGGCCGGTAATACGACTCACTATAGGGGTTCAGAGTTCTACAGTCCGACGATCNNNNNNNNCTGCTCCGTTAT
	MseI_384-barcodes_319	CGATTGAGGCCGGTAATACGACTCACTATAGGGGTTCAGAGTTCTACAGTCCGACGATCNNNNNNNNCCAAGACCTTAT
	MseI_384-barcodes_320	CGATTGAGGCCGGTAATACGACTCACTATAGGGGTTCAGAGTTCTACAGTCCGACGATCNNNNNNNNAAGGCAGTCATT
	MseI_384-barcodes_321	CGATTGAGGCCGGTAATACGACTCACTATAGGGGTTCAGAGTTCTACAGTCCGACGATCNNNNNNNNACTGGCATCCGT
	MseI_384-barcodes_322	CGATTGAGGCCGGTAATACGACTCACTATAGGGGTTCAGAGTTCTACAGTCCGACGATCNNNNNNNNCTGCTGTCTAGT
	MseI_384-barcodes_323	CGATTGAGGCCGGTAATACGACTCACTATAGGGGTTCAGAGTTCTACAGTCCGACGATCNNNNNNNNCTGCCTAATTCT
	MseI_384-barcodes_324	CGATTGAGGCCGGTAATACGACTCACTATAGGGGTTCAGAGTTCTACAGTCCGACGATCNNNNNNNNGAACCTTCATAT
	MseI_384-barcodes_325	CGATTGAGGCCGGTAATACGACTCACTATAGGGGTTCAGAGTTCTACAGTCCGACGATCNNNNNNNNGGTCACGCAAGT
	MseI_384-barcodes_326	CGATTGAGGCCGGTAATACGACTCACTATAGGGGTTCAGAGTTCTACAGTCCGACGATCNNNNNNNNGACGGTCACCTT
	MseI_384-barcodes_327	CGATTGAGGCCGGTAATACGACTCACTATAGGGGTTCAGAGTTCTACAGTCCGACGATCNNNNNNNNGTTATGGCTGTT
	MseI_384-barcodes_328	CGATTGAGGCCGGTAATACGACTCACTATAGGGGTTCAGAGTTCTACAGTCCGACGATCNNNNNNNNGTCGGTCTAGGT
	MseI_384-barcodes_329	CGATTGAGGCCGGTAATACGACTCACTATAGGGGTTCAGAGTTCTACAGTCCGACGATCNNNNNNNNTCAGACCTGGCT
	MseI_384-barcodes_330	CGATTGAGGCCGGTAATACGACTCACTATAGGGGTTCAGAGTTCTACAGTCCGACGATCNNNNNNNNTACGGAGATCGT
	MseI_384-barcodes_331	CGATTGAGGCCGGTAATACGACTCACTATAGGGGTTCAGAGTTCTACAGTCCGACGATCNNNNNNNNTATCATCGTGCT
	MseI_384-barcodes_332	CGATTGAGGCCGGTAATACGACTCACTATAGGGGTTCAGAGTTCTACAGTCCGACGATCNNNNNNNNGTCCACTGGTGT
	MseI_384-barcodes_333	CGATTGAGGCCGGTAATACGACTCACTATAGGGGTTCAGAGTTCTACAGTCCGACGATCNNNNNNNNCATCACTCTTAT
	MseI_384-barcodes_334	CGATTGAGGCCGGTAATACGACTCACTATAGGGGTTCAGAGTTCTACAGTCCGACGATCNNNNNNNNCACTCCGTTGCT
	MseI_384-barcodes_335	CGATTGAGGCCGGTAATACGACTCACTATAGGGGTTCAGAGTTCTACAGTCCGACGATCNNNNNNNNTATCAACCGCGT
	MseI_384-barcodes_336	CGATTGAGGCCGGTAATACGACTCACTATAGGGGTTCAGAGTTCTACAGTCCGACGATCNNNNNNNNTACTTGGCGGTT
	MseI_384-barcodes_337	CGATTGAGGCCGGTAATACGACTCACTATAGGGGTTCAGAGTTCTACAGTCCGACGATCNNNNNNNNTGTTGTTCTTGT
	MseI_384-barcodes_338	CGATTGAGGCCGGTAATACGACTCACTATAGGGGTTCAGAGTTCTACAGTCCGACGATCNNNNNNNNATGGTTCTTCTT
	MseI_384-barcodes_339	CGATTGAGGCCGGTAATACGACTCACTATAGGGGTTCAGAGTTCTACAGTCCGACGATCNNNNNNNNAGGTCAGTTCGT
	MseI_384-barcodes_340	CGATTGAGGCCGGTAATACGACTCACTATAGGGGTTCAGAGTTCTACAGTCCGACGATCNNNNNNNNTCTCGGTATACT
	MseI_384-barcodes_341	CGATTGAGGCCGGTAATACGACTCACTATAGGGGTTCAGAGTTCTACAGTCCGACGATCNNNNNNNNGTCATACTACTT
	MseI_384-barcodes_342	CGATTGAGGCCGGTAATACGACTCACTATAGGGGTTCAGAGTTCTACAGTCCGACGATCNNNNNNNNCGAAGCAGGTCT
	MseI_384-barcodes_343	CGATTGAGGCCGGTAATACGACTCACTATAGGGGTTCAGAGTTCTACAGTCCGACGATCNNNNNNNNTCAGAGGTACGT
	MseI_384-barcodes_344	CGATTGAGGCCGGTAATACGACTCACTATAGGGGTTCAGAGTTCTACAGTCCGACGATCNNNNNNNNCTTAGATCGACT
	MseI_384-barcodes_345	CGATTGAGGCCGGTAATACGACTCACTATAGGGGTTCAGAGTTCTACAGTCCGACGATCNNNNNNNNGATCAGCTATCT
	MseI_384-barcodes_346	CGATTGAGGCCGGTAATACGACTCACTATAGGGGTTCAGAGTTCTACAGTCCGACGATCNNNNNNNNCATGGCCTGGTT
	MseI_384-barcodes_347	CGATTGAGGCCGGTAATACGACTCACTATAGGGGTTCAGAGTTCTACAGTCCGACGATCNNNNNNNNTCCTTATCCGCT
	MseI_384-barcodes_348	CGATTGAGGCCGGTAATACGACTCACTATAGGGGTTCAGAGTTCTACAGTCCGACGATCNNNNNNNNAAGCAGCCGTTT
	MseI_384-barcodes_349	CGATTGAGGCCGGTAATACGACTCACTATAGGGGTTCAGAGTTCTACAGTCCGACGATCNNNNNNNNGTGTCGCCTTCT
	MseI_384-barcodes_350	CGATTGAGGCCGGTAATACGACTCACTATAGGGGTTCAGAGTTCTACAGTCCGACGATCNNNNNNNNGTGCGTACTATT
	MseI_384-barcodes_351	CGATTGAGGCCGGTAATACGACTCACTATAGGGGTTCAGAGTTCTACAGTCCGACGATCNNNNNNNNCGAGACACGAAT
	MseI_384-barcodes_352	CGATTGAGGCCGGTAATACGACTCACTATAGGGGTTCAGAGTTCTACAGTCCGACGATCNNNNNNNNCGGCGATTGGTT
	MseI_384-barcodes_353	CGATTGAGGCCGGTAATACGACTCACTATAGGGGTTCAGAGTTCTACAGTCCGACGATCNNNNNNNNTTATCTGACTCT
	MseI_384-barcodes_354	CGATTGAGGCCGGTAATACGACTCACTATAGGGGTTCAGAGTTCTACAGTCCGACGATCNNNNNNNNGCACCGCAATTT
	MseI_384-barcodes_355	CGATTGAGGCCGGTAATACGACTCACTATAGGGGTTCAGAGTTCTACAGTCCGACGATCNNNNNNNNGTCTGAGAACAT
	MseI_384-barcodes_356	CGATTGAGGCCGGTAATACGACTCACTATAGGGGTTCAGAGTTCTACAGTCCGACGATCNNNNNNNNCCGCTAACACAT
	MseI_384-barcodes_357	CGATTGAGGCCGGTAATACGACTCACTATAGGGGTTCAGAGTTCTACAGTCCGACGATCNNNNNNNNAGGCAATGATGT
	MseI_384-barcodes_358	CGATTGAGGCCGGTAATACGACTCACTATAGGGGTTCAGAGTTCTACAGTCCGACGATCNNNNNNNNAATGTCTCACAT
	MseI_384-barcodes_359	CGATTGAGGCCGGTAATACGACTCACTATAGGGGTTCAGAGTTCTACAGTCCGACGATCNNNNNNNNCTGAAGGAACAT
	MseI_384-barcodes_360	CGATTGAGGCCGGTAATACGACTCACTATAGGGGTTCAGAGTTCTACAGTCCGACGATCNNNNNNNNGGCTGTGGCTTT
	MseI_384-barcodes_361	CGATTGAGGCCGGTAATACGACTCACTATAGGGGTTCAGAGTTCTACAGTCCGACGATCNNNNNNNNCATGGTGGAACT
	MseI_384-barcodes_362	CGATTGAGGCCGGTAATACGACTCACTATAGGGGTTCAGAGTTCTACAGTCCGACGATCNNNNNNNNGTTCTCACCGGT
	MseI_384-barcodes_363	CGATTGAGGCCGGTAATACGACTCACTATAGGGGTTCAGAGTTCTACAGTCCGACGATCNNNNNNNNTCCGCTCTTATT
	MseI_384-barcodes_364	CGATTGAGGCCGGTAATACGACTCACTATAGGGGTTCAGAGTTCTACAGTCCGACGATCNNNNNNNNAGCCGAGGAGTT
	MseI_384-barcodes_365	CGATTGAGGCCGGTAATACGACTCACTATAGGGGTTCAGAGTTCTACAGTCCGACGATCNNNNNNNNTTGAGCTTCTAT
	MseI_384-barcodes_366	CGATTGAGGCCGGTAATACGACTCACTATAGGGGTTCAGAGTTCTACAGTCCGACGATCNNNNNNNNGGCTTAATGCCT
	MseI_384-barcodes_367	CGATTGAGGCCGGTAATACGACTCACTATAGGGGTTCAGAGTTCTACAGTCCGACGATCNNNNNNNNAGTTAGGATGAT
	MseI_384-barcodes_368	CGATTGAGGCCGGTAATACGACTCACTATAGGGGTTCAGAGTTCTACAGTCCGACGATCNNNNNNNNGAAGATTATCGT
	MseI_384-barcodes_369	CGATTGAGGCCGGTAATACGACTCACTATAGGGGTTCAGAGTTCTACAGTCCGACGATCNNNNNNNNGAGTAAGCTGAT
	MseI_384-barcodes_370	CGATTGAGGCCGGTAATACGACTCACTATAGGGGTTCAGAGTTCTACAGTCCGACGATCNNNNNNNNAGGCTGTAGCGT
	MseI_384-barcodes_371	CGATTGAGGCCGGTAATACGACTCACTATAGGGGTTCAGAGTTCTACAGTCCGACGATCNNNNNNNNACATGTCTTACT
	MseI_384-barcodes_372	CGATTGAGGCCGGTAATACGACTCACTATAGGGGTTCAGAGTTCTACAGTCCGACGATCNNNNNNNNGAGGCCATAGTT
	MseI_384-barcodes_373	CGATTGAGGCCGGTAATACGACTCACTATAGGGGTTCAGAGTTCTACAGTCCGACGATCNNNNNNNNGAAGGCTCGACT
	MseI_384-barcodes_374	CGATTGAGGCCGGTAATACGACTCACTATAGGGGTTCAGAGTTCTACAGTCCGACGATCNNNNNNNNGAGGCTCGGATT
	MseI_384-barcodes_375	CGATTGAGGCCGGTAATACGACTCACTATAGGGGTTCAGAGTTCTACAGTCCGACGATCNNNNNNNNCGTATGACGGAT
	MseI_384-barcodes_376	CGATTGAGGCCGGTAATACGACTCACTATAGGGGTTCAGAGTTCTACAGTCCGACGATCNNNNNNNNTCACAGATCTCT
	MseI_384-barcodes_377	CGATTGAGGCCGGTAATACGACTCACTATAGGGGTTCAGAGTTCTACAGTCCGACGATCNNNNNNNNTTCCGATCTGGT
	MseI_384-barcodes_378	CGATTGAGGCCGGTAATACGACTCACTATAGGGGTTCAGAGTTCTACAGTCCGACGATCNNNNNNNNGTTCCACAAGAT
	MseI_384-barcodes_379	CGATTGAGGCCGGTAATACGACTCACTATAGGGGTTCAGAGTTCTACAGTCCGACGATCNNNNNNNNATCCATAGTCCT
	MseI_384-barcodes_380	CGATTGAGGCCGGTAATACGACTCACTATAGGGGTTCAGAGTTCTACAGTCCGACGATCNNNNNNNNTTGTATACGGTT
	MseI_384-barcodes_381	CGATTGAGGCCGGTAATACGACTCACTATAGGGGTTCAGAGTTCTACAGTCCGACGATCNNNNNNNNCTCTAGATTGTT
	MseI_384-barcodes_382	CGATTGAGGCCGGTAATACGACTCACTATAGGGGTTCAGAGTTCTACAGTCCGACGATCNNNNNNNNCCAAGGCAAGCT
	MseI_384-barcodes_383	CGATTGAGGCCGGTAATACGACTCACTATAGGGGTTCAGAGTTCTACAGTCCGACGATCNNNNNNNNGCTGGTTGCGAT
	MseI_384-barcodes_384	CGATTGAGGCCGGTAATACGACTCACTATAGGGGTTCAGAGTTCTACAGTCCGACGATCNNNNNNNNTAACCGTATTGT

## Sheet: NlaIII_For_384-barcodes
Supplementary Table 3. List of oligonucleotides that can be used to prepare COVseq adapters.
	Adapter ID	Sequence (5'->3')
	NlaIII_384-barcodes_1	CAGAAGAGTTCNNNNNNNNGATCGTCGGACTGTAGAACTCTGAACCCCTATAGTGAGTCGTATTACCGGCCTCAATCGAA
	NlaIII_384-barcodes_2	ATCATGTTCGANNNNNNNNGATCGTCGGACTGTAGAACTCTGAACCCCTATAGTGAGTCGTATTACCGGCCTCAATCGAA
	NlaIII_384-barcodes_3	CGAGCTATGCCNNNNNNNNGATCGTCGGACTGTAGAACTCTGAACCCCTATAGTGAGTCGTATTACCGGCCTCAATCGAA
	NlaIII_384-barcodes_4	TCGCGGCTGTTNNNNNNNNGATCGTCGGACTGTAGAACTCTGAACCCCTATAGTGAGTCGTATTACCGGCCTCAATCGAA
	NlaIII_384-barcodes_5	ACACACAGAGGNNNNNNNNGATCGTCGGACTGTAGAACTCTGAACCCCTATAGTGAGTCGTATTACCGGCCTCAATCGAA
	NlaIII_384-barcodes_6	TGCCGTTGGCTNNNNNNNNGATCGTCGGACTGTAGAACTCTGAACCCCTATAGTGAGTCGTATTACCGGCCTCAATCGAA
	NlaIII_384-barcodes_7	CGCGAAGTCATNNNNNNNNGATCGTCGGACTGTAGAACTCTGAACCCCTATAGTGAGTCGTATTACCGGCCTCAATCGAA
	NlaIII_384-barcodes_8	TGACGACCGAGNNNNNNNNGATCGTCGGACTGTAGAACTCTGAACCCCTATAGTGAGTCGTATTACCGGCCTCAATCGAA
	NlaIII_384-barcodes_9	CCACAATTACCNNNNNNNNGATCGTCGGACTGTAGAACTCTGAACCCCTATAGTGAGTCGTATTACCGGCCTCAATCGAA
	NlaIII_384-barcodes_10	ACTTGGACCGGNNNNNNNNGATCGTCGGACTGTAGAACTCTGAACCCCTATAGTGAGTCGTATTACCGGCCTCAATCGAA
	NlaIII_384-barcodes_11	GTCGTAGATCANNNNNNNNGATCGTCGGACTGTAGAACTCTGAACCCCTATAGTGAGTCGTATTACCGGCCTCAATCGAA
	NlaIII_384-barcodes_12	GGTCTGTGAGGNNNNNNNNGATCGTCGGACTGTAGAACTCTGAACCCCTATAGTGAGTCGTATTACCGGCCTCAATCGAA
	NlaIII_384-barcodes_13	GCATCTAGCTANNNNNNNNGATCGTCGGACTGTAGAACTCTGAACCCCTATAGTGAGTCGTATTACCGGCCTCAATCGAA
	NlaIII_384-barcodes_14	CGTACACTCTGNNNNNNNNGATCGTCGGACTGTAGAACTCTGAACCCCTATAGTGAGTCGTATTACCGGCCTCAATCGAA
	NlaIII_384-barcodes_15	GGCACAGTATCNNNNNNNNGATCGTCGGACTGTAGAACTCTGAACCCCTATAGTGAGTCGTATTACCGGCCTCAATCGAA
	NlaIII_384-barcodes_16	TAGACGTGAACNNNNNNNNGATCGTCGGACTGTAGAACTCTGAACCCCTATAGTGAGTCGTATTACCGGCCTCAATCGAA
	NlaIII_384-barcodes_17	CCAATGGTCAANNNNNNNNGATCGTCGGACTGTAGAACTCTGAACCCCTATAGTGAGTCGTATTACCGGCCTCAATCGAA
	NlaIII_384-barcodes_18	TCGTCATGCGGNNNNNNNNGATCGTCGGACTGTAGAACTCTGAACCCCTATAGTGAGTCGTATTACCGGCCTCAATCGAA
	NlaIII_384-barcodes_19	ATGTGAAGCGTNNNNNNNNGATCGTCGGACTGTAGAACTCTGAACCCCTATAGTGAGTCGTATTACCGGCCTCAATCGAA
	NlaIII_384-barcodes_20	GGCTGAGAAGGNNNNNNNNGATCGTCGGACTGTAGAACTCTGAACCCCTATAGTGAGTCGTATTACCGGCCTCAATCGAA
	NlaIII_384-barcodes_21	GTACCGAGAACNNNNNNNNGATCGTCGGACTGTAGAACTCTGAACCCCTATAGTGAGTCGTATTACCGGCCTCAATCGAA
	NlaIII_384-barcodes_22	CTTCAGCAGTTNNNNNNNNGATCGTCGGACTGTAGAACTCTGAACCCCTATAGTGAGTCGTATTACCGGCCTCAATCGAA
	NlaIII_384-barcodes_23	ATTGGTGCTCCNNNNNNNNGATCGTCGGACTGTAGAACTCTGAACCCCTATAGTGAGTCGTATTACCGGCCTCAATCGAA
	NlaIII_384-barcodes_24	CTTGATCGTGTNNNNNNNNGATCGTCGGACTGTAGAACTCTGAACCCCTATAGTGAGTCGTATTACCGGCCTCAATCGAA
	NlaIII_384-barcodes_25	CATGAGGCGCANNNNNNNNGATCGTCGGACTGTAGAACTCTGAACCCCTATAGTGAGTCGTATTACCGGCCTCAATCGAA
	NlaIII_384-barcodes_26	TGCTATGGCAGNNNNNNNNGATCGTCGGACTGTAGAACTCTGAACCCCTATAGTGAGTCGTATTACCGGCCTCAATCGAA
	NlaIII_384-barcodes_27	AGCTATTCTGANNNNNNNNGATCGTCGGACTGTAGAACTCTGAACCCCTATAGTGAGTCGTATTACCGGCCTCAATCGAA
	NlaIII_384-barcodes_28	GATTAACACGTNNNNNNNNGATCGTCGGACTGTAGAACTCTGAACCCCTATAGTGAGTCGTATTACCGGCCTCAATCGAA
	NlaIII_384-barcodes_29	TTCAGTCCAGCNNNNNNNNGATCGTCGGACTGTAGAACTCTGAACCCCTATAGTGAGTCGTATTACCGGCCTCAATCGAA
	NlaIII_384-barcodes_30	AATCTCTCTACNNNNNNNNGATCGTCGGACTGTAGAACTCTGAACCCCTATAGTGAGTCGTATTACCGGCCTCAATCGAA
	NlaIII_384-barcodes_31	CACATGCGGTANNNNNNNNGATCGTCGGACTGTAGAACTCTGAACCCCTATAGTGAGTCGTATTACCGGCCTCAATCGAA
	NlaIII_384-barcodes_32	GGAGGCCATCANNNNNNNNGATCGTCGGACTGTAGAACTCTGAACCCCTATAGTGAGTCGTATTACCGGCCTCAATCGAA
	NlaIII_384-barcodes_33	TGCGTGAGGCANNNNNNNNGATCGTCGGACTGTAGAACTCTGAACCCCTATAGTGAGTCGTATTACCGGCCTCAATCGAA
	NlaIII_384-barcodes_34	CTAAGCGAATANNNNNNNNGATCGTCGGACTGTAGAACTCTGAACCCCTATAGTGAGTCGTATTACCGGCCTCAATCGAA
	NlaIII_384-barcodes_35	CAATGTCGACGNNNNNNNNGATCGTCGGACTGTAGAACTCTGAACCCCTATAGTGAGTCGTATTACCGGCCTCAATCGAA
	NlaIII_384-barcodes_36	TCTCGTTACATNNNNNNNNGATCGTCGGACTGTAGAACTCTGAACCCCTATAGTGAGTCGTATTACCGGCCTCAATCGAA
	NlaIII_384-barcodes_37	AATATAGACCGNNNNNNNNGATCGTCGGACTGTAGAACTCTGAACCCCTATAGTGAGTCGTATTACCGGCCTCAATCGAA
	NlaIII_384-barcodes_38	CCTATCATGCTNNNNNNNNGATCGTCGGACTGTAGAACTCTGAACCCCTATAGTGAGTCGTATTACCGGCCTCAATCGAA
	NlaIII_384-barcodes_39	CACGACAACTCNNNNNNNNGATCGTCGGACTGTAGAACTCTGAACCCCTATAGTGAGTCGTATTACCGGCCTCAATCGAA
	NlaIII_384-barcodes_40	CCTGCAGATGANNNNNNNNGATCGTCGGACTGTAGAACTCTGAACCCCTATAGTGAGTCGTATTACCGGCCTCAATCGAA
	NlaIII_384-barcodes_41	AGAGCTGCATGNNNNNNNNGATCGTCGGACTGTAGAACTCTGAACCCCTATAGTGAGTCGTATTACCGGCCTCAATCGAA
	NlaIII_384-barcodes_42	TGACCTTCTCANNNNNNNNGATCGTCGGACTGTAGAACTCTGAACCCCTATAGTGAGTCGTATTACCGGCCTCAATCGAA
	NlaIII_384-barcodes_43	GAATGGCTAACNNNNNNNNGATCGTCGGACTGTAGAACTCTGAACCCCTATAGTGAGTCGTATTACCGGCCTCAATCGAA
	NlaIII_384-barcodes_44	ACCTTGTCGACNNNNNNNNGATCGTCGGACTGTAGAACTCTGAACCCCTATAGTGAGTCGTATTACCGGCCTCAATCGAA
	NlaIII_384-barcodes_45	TTGATGCCGTCNNNNNNNNGATCGTCGGACTGTAGAACTCTGAACCCCTATAGTGAGTCGTATTACCGGCCTCAATCGAA
	NlaIII_384-barcodes_46	CTTGACTGGTANNNNNNNNGATCGTCGGACTGTAGAACTCTGAACCCCTATAGTGAGTCGTATTACCGGCCTCAATCGAA
	NlaIII_384-barcodes_47	ACTCAGTGCGANNNNNNNNGATCGTCGGACTGTAGAACTCTGAACCCCTATAGTGAGTCGTATTACCGGCCTCAATCGAA
	NlaIII_384-barcodes_48	TAAGGCCGGATNNNNNNNNGATCGTCGGACTGTAGAACTCTGAACCCCTATAGTGAGTCGTATTACCGGCCTCAATCGAA
	NlaIII_384-barcodes_49	CGAATCCGCTTNNNNNNNNGATCGTCGGACTGTAGAACTCTGAACCCCTATAGTGAGTCGTATTACCGGCCTCAATCGAA
	NlaIII_384-barcodes_50	ATCGGATCAGGNNNNNNNNGATCGTCGGACTGTAGAACTCTGAACCCCTATAGTGAGTCGTATTACCGGCCTCAATCGAA
	NlaIII_384-barcodes_51	GTCCACGTAGCNNNNNNNNGATCGTCGGACTGTAGAACTCTGAACCCCTATAGTGAGTCGTATTACCGGCCTCAATCGAA
	NlaIII_384-barcodes_52	TACCATAATGGNNNNNNNNGATCGTCGGACTGTAGAACTCTGAACCCCTATAGTGAGTCGTATTACCGGCCTCAATCGAA
	NlaIII_384-barcodes_53	TATGTGTTCTCNNNNNNNNGATCGTCGGACTGTAGAACTCTGAACCCCTATAGTGAGTCGTATTACCGGCCTCAATCGAA
	NlaIII_384-barcodes_54	ATGTTGTGTGGNNNNNNNNGATCGTCGGACTGTAGAACTCTGAACCCCTATAGTGAGTCGTATTACCGGCCTCAATCGAA
	NlaIII_384-barcodes_55	AGGAGCCTAAGNNNNNNNNGATCGTCGGACTGTAGAACTCTGAACCCCTATAGTGAGTCGTATTACCGGCCTCAATCGAA
	NlaIII_384-barcodes_56	GCGACACGAGANNNNNNNNGATCGTCGGACTGTAGAACTCTGAACCCCTATAGTGAGTCGTATTACCGGCCTCAATCGAA
	NlaIII_384-barcodes_57	CTACTACAGAANNNNNNNNGATCGTCGGACTGTAGAACTCTGAACCCCTATAGTGAGTCGTATTACCGGCCTCAATCGAA
	NlaIII_384-barcodes_58	CCGAGGTGACTNNNNNNNNGATCGTCGGACTGTAGAACTCTGAACCCCTATAGTGAGTCGTATTACCGGCCTCAATCGAA
	NlaIII_384-barcodes_59	AGAGGACGACTNNNNNNNNGATCGTCGGACTGTAGAACTCTGAACCCCTATAGTGAGTCGTATTACCGGCCTCAATCGAA
	NlaIII_384-barcodes_60	AGAGGCGTGAANNNNNNNNGATCGTCGGACTGTAGAACTCTGAACCCCTATAGTGAGTCGTATTACCGGCCTCAATCGAA
	NlaIII_384-barcodes_61	AGTGTGTAGCCNNNNNNNNGATCGTCGGACTGTAGAACTCTGAACCCCTATAGTGAGTCGTATTACCGGCCTCAATCGAA
	NlaIII_384-barcodes_62	AAGGAAGTACCNNNNNNNNGATCGTCGGACTGTAGAACTCTGAACCCCTATAGTGAGTCGTATTACCGGCCTCAATCGAA
	NlaIII_384-barcodes_63	GCGCAGATTGTNNNNNNNNGATCGTCGGACTGTAGAACTCTGAACCCCTATAGTGAGTCGTATTACCGGCCTCAATCGAA
	NlaIII_384-barcodes_64	GTAATCTACCANNNNNNNNGATCGTCGGACTGTAGAACTCTGAACCCCTATAGTGAGTCGTATTACCGGCCTCAATCGAA
	NlaIII_384-barcodes_65	AAGGCGACTGCNNNNNNNNGATCGTCGGACTGTAGAACTCTGAACCCCTATAGTGAGTCGTATTACCGGCCTCAATCGAA
	NlaIII_384-barcodes_66	GCTTAAGCTGCNNNNNNNNGATCGTCGGACTGTAGAACTCTGAACCCCTATAGTGAGTCGTATTACCGGCCTCAATCGAA
	NlaIII_384-barcodes_67	CTGATTCATGANNNNNNNNGATCGTCGGACTGTAGAACTCTGAACCCCTATAGTGAGTCGTATTACCGGCCTCAATCGAA
	NlaIII_384-barcodes_68	TGACAATTCGANNNNNNNNGATCGTCGGACTGTAGAACTCTGAACCCCTATAGTGAGTCGTATTACCGGCCTCAATCGAA
	NlaIII_384-barcodes_69	GCAGCAGCAGTNNNNNNNNGATCGTCGGACTGTAGAACTCTGAACCCCTATAGTGAGTCGTATTACCGGCCTCAATCGAA
	NlaIII_384-barcodes_70	ATATGTCACTCNNNNNNNNGATCGTCGGACTGTAGAACTCTGAACCCCTATAGTGAGTCGTATTACCGGCCTCAATCGAA
	NlaIII_384-barcodes_71	CGGTCGGTATTNNNNNNNNGATCGTCGGACTGTAGAACTCTGAACCCCTATAGTGAGTCGTATTACCGGCCTCAATCGAA
	NlaIII_384-barcodes_72	TGTAGGCAGCGNNNNNNNNGATCGTCGGACTGTAGAACTCTGAACCCCTATAGTGAGTCGTATTACCGGCCTCAATCGAA
	NlaIII_384-barcodes_73	AACGTCGAATGNNNNNNNNGATCGTCGGACTGTAGAACTCTGAACCCCTATAGTGAGTCGTATTACCGGCCTCAATCGAA
	NlaIII_384-barcodes_74	TACAGGTCCATNNNNNNNNGATCGTCGGACTGTAGAACTCTGAACCCCTATAGTGAGTCGTATTACCGGCCTCAATCGAA
	NlaIII_384-barcodes_75	TCGTGCTAGTANNNNNNNNGATCGTCGGACTGTAGAACTCTGAACCCCTATAGTGAGTCGTATTACCGGCCTCAATCGAA
	NlaIII_384-barcodes_76	AATCGGATTGANNNNNNNNGATCGTCGGACTGTAGAACTCTGAACCCCTATAGTGAGTCGTATTACCGGCCTCAATCGAA
	NlaIII_384-barcodes_77	TATGACGCCGGNNNNNNNNGATCGTCGGACTGTAGAACTCTGAACCCCTATAGTGAGTCGTATTACCGGCCTCAATCGAA
	NlaIII_384-barcodes_78	GGTGCAATCGTNNNNNNNNGATCGTCGGACTGTAGAACTCTGAACCCCTATAGTGAGTCGTATTACCGGCCTCAATCGAA
	NlaIII_384-barcodes_79	GGATTCACAGTNNNNNNNNGATCGTCGGACTGTAGAACTCTGAACCCCTATAGTGAGTCGTATTACCGGCCTCAATCGAA
	NlaIII_384-barcodes_80	GATCTGTACAANNNNNNNNGATCGTCGGACTGTAGAACTCTGAACCCCTATAGTGAGTCGTATTACCGGCCTCAATCGAA
	NlaIII_384-barcodes_81	GATACTCAGTANNNNNNNNGATCGTCGGACTGTAGAACTCTGAACCCCTATAGTGAGTCGTATTACCGGCCTCAATCGAA
	NlaIII_384-barcodes_82	TGCAAGAACACNNNNNNNNGATCGTCGGACTGTAGAACTCTGAACCCCTATAGTGAGTCGTATTACCGGCCTCAATCGAA
	NlaIII_384-barcodes_83	CTCTCCGCTTCNNNNNNNNGATCGTCGGACTGTAGAACTCTGAACCCCTATAGTGAGTCGTATTACCGGCCTCAATCGAA
	NlaIII_384-barcodes_84	ACTCGCCTACCNNNNNNNNGATCGTCGGACTGTAGAACTCTGAACCCCTATAGTGAGTCGTATTACCGGCCTCAATCGAA
	NlaIII_384-barcodes_85	GAGATTCTCTCNNNNNNNNGATCGTCGGACTGTAGAACTCTGAACCCCTATAGTGAGTCGTATTACCGGCCTCAATCGAA
	NlaIII_384-barcodes_86	ATCTTAGTGCTNNNNNNNNGATCGTCGGACTGTAGAACTCTGAACCCCTATAGTGAGTCGTATTACCGGCCTCAATCGAA
	NlaIII_384-barcodes_87	GCCGGATAGCTNNNNNNNNGATCGTCGGACTGTAGAACTCTGAACCCCTATAGTGAGTCGTATTACCGGCCTCAATCGAA
	NlaIII_384-barcodes_88	CGCTAGAAGGANNNNNNNNGATCGTCGGACTGTAGAACTCTGAACCCCTATAGTGAGTCGTATTACCGGCCTCAATCGAA
	NlaIII_384-barcodes_89	GTGTAGGCCACNNNNNNNNGATCGTCGGACTGTAGAACTCTGAACCCCTATAGTGAGTCGTATTACCGGCCTCAATCGAA
	NlaIII_384-barcodes_90	GAGGTTCCGGTNNNNNNNNGATCGTCGGACTGTAGAACTCTGAACCCCTATAGTGAGTCGTATTACCGGCCTCAATCGAA
	NlaIII_384-barcodes_91	CCACTGTCGTTNNNNNNNNGATCGTCGGACTGTAGAACTCTGAACCCCTATAGTGAGTCGTATTACCGGCCTCAATCGAA
	NlaIII_384-barcodes_92	ACCTCAGGACGNNNNNNNNGATCGTCGGACTGTAGAACTCTGAACCCCTATAGTGAGTCGTATTACCGGCCTCAATCGAA
	NlaIII_384-barcodes_93	ATTGTCAGAGANNNNNNNNGATCGTCGGACTGTAGAACTCTGAACCCCTATAGTGAGTCGTATTACCGGCCTCAATCGAA
	NlaIII_384-barcodes_94	CCAACATTGATNNNNNNNNGATCGTCGGACTGTAGAACTCTGAACCCCTATAGTGAGTCGTATTACCGGCCTCAATCGAA
	NlaIII_384-barcodes_95	AGGCTAGTCACNNNNNNNNGATCGTCGGACTGTAGAACTCTGAACCCCTATAGTGAGTCGTATTACCGGCCTCAATCGAA
	NlaIII_384-barcodes_96	ATCCTTAACCGNNNNNNNNGATCGTCGGACTGTAGAACTCTGAACCCCTATAGTGAGTCGTATTACCGGCCTCAATCGAA
	NlaIII_384-barcodes_97	CGTCGATTAGTNNNNNNNNGATCGTCGGACTGTAGAACTCTGAACCCCTATAGTGAGTCGTATTACCGGCCTCAATCGAA
	NlaIII_384-barcodes_98	GGTAATGCTCTNNNNNNNNGATCGTCGGACTGTAGAACTCTGAACCCCTATAGTGAGTCGTATTACCGGCCTCAATCGAA
	NlaIII_384-barcodes_99	GTTAACGCGTCNNNNNNNNGATCGTCGGACTGTAGAACTCTGAACCCCTATAGTGAGTCGTATTACCGGCCTCAATCGAA
	NlaIII_384-barcodes_100	TCGCCAGCTCTNNNNNNNNGATCGTCGGACTGTAGAACTCTGAACCCCTATAGTGAGTCGTATTACCGGCCTCAATCGAA
	NlaIII_384-barcodes_101	GCCACCTCATTNNNNNNNNGATCGTCGGACTGTAGAACTCTGAACCCCTATAGTGAGTCGTATTACCGGCCTCAATCGAA
	NlaIII_384-barcodes_102	AGATTGGTGTCNNNNNNNNGATCGTCGGACTGTAGAACTCTGAACCCCTATAGTGAGTCGTATTACCGGCCTCAATCGAA
	NlaIII_384-barcodes_103	AGGTATTAGAGNNNNNNNNGATCGTCGGACTGTAGAACTCTGAACCCCTATAGTGAGTCGTATTACCGGCCTCAATCGAA
	NlaIII_384-barcodes_104	TTCTGCGTCGGNNNNNNNNGATCGTCGGACTGTAGAACTCTGAACCCCTATAGTGAGTCGTATTACCGGCCTCAATCGAA
	NlaIII_384-barcodes_105	CCTCTAACTATNNNNNNNNGATCGTCGGACTGTAGAACTCTGAACCCCTATAGTGAGTCGTATTACCGGCCTCAATCGAA
	NlaIII_384-barcodes_106	CGTAGCACGTGNNNNNNNNGATCGTCGGACTGTAGAACTCTGAACCCCTATAGTGAGTCGTATTACCGGCCTCAATCGAA
	NlaIII_384-barcodes_107	TGGTGCCAAGCNNNNNNNNGATCGTCGGACTGTAGAACTCTGAACCCCTATAGTGAGTCGTATTACCGGCCTCAATCGAA
	NlaIII_384-barcodes_108	TCTGTACGTAGNNNNNNNNGATCGTCGGACTGTAGAACTCTGAACCCCTATAGTGAGTCGTATTACCGGCCTCAATCGAA
	NlaIII_384-barcodes_109	AGTTGTGCAGTNNNNNNNNGATCGTCGGACTGTAGAACTCTGAACCCCTATAGTGAGTCGTATTACCGGCCTCAATCGAA
	NlaIII_384-barcodes_110	CTCGGCATTATNNNNNNNNGATCGTCGGACTGTAGAACTCTGAACCCCTATAGTGAGTCGTATTACCGGCCTCAATCGAA
	NlaIII_384-barcodes_111	CATAGGTTCGGNNNNNNNNGATCGTCGGACTGTAGAACTCTGAACCCCTATAGTGAGTCGTATTACCGGCCTCAATCGAA
	NlaIII_384-barcodes_112	ACCATTGGTAANNNNNNNNGATCGTCGGACTGTAGAACTCTGAACCCCTATAGTGAGTCGTATTACCGGCCTCAATCGAA
	NlaIII_384-barcodes_113	GGTTGTAATAGNNNNNNNNGATCGTCGGACTGTAGAACTCTGAACCCCTATAGTGAGTCGTATTACCGGCCTCAATCGAA
	NlaIII_384-barcodes_114	TGCTGGCGCTANNNNNNNNGATCGTCGGACTGTAGAACTCTGAACCCCTATAGTGAGTCGTATTACCGGCCTCAATCGAA
	NlaIII_384-barcodes_115	GTGGTGCTACCNNNNNNNNGATCGTCGGACTGTAGAACTCTGAACCCCTATAGTGAGTCGTATTACCGGCCTCAATCGAA
	NlaIII_384-barcodes_116	AACCTATGTGTNNNNNNNNGATCGTCGGACTGTAGAACTCTGAACCCCTATAGTGAGTCGTATTACCGGCCTCAATCGAA
	NlaIII_384-barcodes_117	CGAGAGTCCAANNNNNNNNGATCGTCGGACTGTAGAACTCTGAACCCCTATAGTGAGTCGTATTACCGGCCTCAATCGAA
	NlaIII_384-barcodes_118	TCATCGGTTGANNNNNNNNGATCGTCGGACTGTAGAACTCTGAACCCCTATAGTGAGTCGTATTACCGGCCTCAATCGAA
	NlaIII_384-barcodes_119	CAATTACCAGCNNNNNNNNGATCGTCGGACTGTAGAACTCTGAACCCCTATAGTGAGTCGTATTACCGGCCTCAATCGAA
	NlaIII_384-barcodes_120	GAGACAACCACNNNNNNNNGATCGTCGGACTGTAGAACTCTGAACCCCTATAGTGAGTCGTATTACCGGCCTCAATCGAA
	NlaIII_384-barcodes_121	GATTCTATGGCNNNNNNNNGATCGTCGGACTGTAGAACTCTGAACCCCTATAGTGAGTCGTATTACCGGCCTCAATCGAA
	NlaIII_384-barcodes_122	ATTCTGACGCANNNNNNNNGATCGTCGGACTGTAGAACTCTGAACCCCTATAGTGAGTCGTATTACCGGCCTCAATCGAA
	NlaIII_384-barcodes_123	CTGTCGGAGCANNNNNNNNGATCGTCGGACTGTAGAACTCTGAACCCCTATAGTGAGTCGTATTACCGGCCTCAATCGAA
	NlaIII_384-barcodes_124	ACTGTACTGTANNNNNNNNGATCGTCGGACTGTAGAACTCTGAACCCCTATAGTGAGTCGTATTACCGGCCTCAATCGAA
	NlaIII_384-barcodes_125	CTGGTGATGTANNNNNNNNGATCGTCGGACTGTAGAACTCTGAACCCCTATAGTGAGTCGTATTACCGGCCTCAATCGAA
	NlaIII_384-barcodes_126	ACACATGCACTNNNNNNNNGATCGTCGGACTGTAGAACTCTGAACCCCTATAGTGAGTCGTATTACCGGCCTCAATCGAA
	NlaIII_384-barcodes_127	CTCTGTCAGATNNNNNNNNGATCGTCGGACTGTAGAACTCTGAACCCCTATAGTGAGTCGTATTACCGGCCTCAATCGAA
	NlaIII_384-barcodes_128	GTAGAACCGATNNNNNNNNGATCGTCGGACTGTAGAACTCTGAACCCCTATAGTGAGTCGTATTACCGGCCTCAATCGAA
	NlaIII_384-barcodes_129	GGAATCCTGACNNNNNNNNGATCGTCGGACTGTAGAACTCTGAACCCCTATAGTGAGTCGTATTACCGGCCTCAATCGAA
	NlaIII_384-barcodes_130	ATCACCTGTTGNNNNNNNNGATCGTCGGACTGTAGAACTCTGAACCCCTATAGTGAGTCGTATTACCGGCCTCAATCGAA
	NlaIII_384-barcodes_131	CTGTACCTCGTNNNNNNNNGATCGTCGGACTGTAGAACTCTGAACCCCTATAGTGAGTCGTATTACCGGCCTCAATCGAA
	NlaIII_384-barcodes_132	TACGAGCTGCCNNNNNNNNGATCGTCGGACTGTAGAACTCTGAACCCCTATAGTGAGTCGTATTACCGGCCTCAATCGAA
	NlaIII_384-barcodes_133	CCAGGTACCTTNNNNNNNNGATCGTCGGACTGTAGAACTCTGAACCCCTATAGTGAGTCGTATTACCGGCCTCAATCGAA
	NlaIII_384-barcodes_134	TAATTCTGCGTNNNNNNNNGATCGTCGGACTGTAGAACTCTGAACCCCTATAGTGAGTCGTATTACCGGCCTCAATCGAA
	NlaIII_384-barcodes_135	GTAGCATAGGCNNNNNNNNGATCGTCGGACTGTAGAACTCTGAACCCCTATAGTGAGTCGTATTACCGGCCTCAATCGAA
	NlaIII_384-barcodes_136	CGCCTTACATTNNNNNNNNGATCGTCGGACTGTAGAACTCTGAACCCCTATAGTGAGTCGTATTACCGGCCTCAATCGAA
	NlaIII_384-barcodes_137	GTTCGATACCGNNNNNNNNGATCGTCGGACTGTAGAACTCTGAACCCCTATAGTGAGTCGTATTACCGGCCTCAATCGAA
	NlaIII_384-barcodes_138	TCTCCTTCGGCNNNNNNNNGATCGTCGGACTGTAGAACTCTGAACCCCTATAGTGAGTCGTATTACCGGCCTCAATCGAA
	NlaIII_384-barcodes_139	ACACCGGCGAANNNNNNNNGATCGTCGGACTGTAGAACTCTGAACCCCTATAGTGAGTCGTATTACCGGCCTCAATCGAA
	NlaIII_384-barcodes_140	AACAGCATTCCNNNNNNNNGATCGTCGGACTGTAGAACTCTGAACCCCTATAGTGAGTCGTATTACCGGCCTCAATCGAA
	NlaIII_384-barcodes_141	CACCTAGACTTNNNNNNNNGATCGTCGGACTGTAGAACTCTGAACCCCTATAGTGAGTCGTATTACCGGCCTCAATCGAA
	NlaIII_384-barcodes_142	CATATCCACACNNNNNNNNGATCGTCGGACTGTAGAACTCTGAACCCCTATAGTGAGTCGTATTACCGGCCTCAATCGAA
	NlaIII_384-barcodes_143	TGGTGGATTACNNNNNNNNGATCGTCGGACTGTAGAACTCTGAACCCCTATAGTGAGTCGTATTACCGGCCTCAATCGAA
	NlaIII_384-barcodes_144	TGGCTCACGATNNNNNNNNGATCGTCGGACTGTAGAACTCTGAACCCCTATAGTGAGTCGTATTACCGGCCTCAATCGAA
	NlaIII_384-barcodes_145	AGAAGGTACGCNNNNNNNNGATCGTCGGACTGTAGAACTCTGAACCCCTATAGTGAGTCGTATTACCGGCCTCAATCGAA
	NlaIII_384-barcodes_146	AATGCGCCAAGNNNNNNNNGATCGTCGGACTGTAGAACTCTGAACCCCTATAGTGAGTCGTATTACCGGCCTCAATCGAA
	NlaIII_384-barcodes_147	TTATCGATGAGNNNNNNNNGATCGTCGGACTGTAGAACTCTGAACCCCTATAGTGAGTCGTATTACCGGCCTCAATCGAA
	NlaIII_384-barcodes_148	ATCACACGGAANNNNNNNNGATCGTCGGACTGTAGAACTCTGAACCCCTATAGTGAGTCGTATTACCGGCCTCAATCGAA
	NlaIII_384-barcodes_149	CAAGGTAGTACNNNNNNNNGATCGTCGGACTGTAGAACTCTGAACCCCTATAGTGAGTCGTATTACCGGCCTCAATCGAA
	NlaIII_384-barcodes_150	ATACTGCGACGNNNNNNNNGATCGTCGGACTGTAGAACTCTGAACCCCTATAGTGAGTCGTATTACCGGCCTCAATCGAA
	NlaIII_384-barcodes_151	GTCAGTATGGTNNNNNNNNGATCGTCGGACTGTAGAACTCTGAACCCCTATAGTGAGTCGTATTACCGGCCTCAATCGAA
	NlaIII_384-barcodes_152	CACTCGACAGGNNNNNNNNGATCGTCGGACTGTAGAACTCTGAACCCCTATAGTGAGTCGTATTACCGGCCTCAATCGAA
	NlaIII_384-barcodes_153	GCTCGCCAGAANNNNNNNNGATCGTCGGACTGTAGAACTCTGAACCCCTATAGTGAGTCGTATTACCGGCCTCAATCGAA
	NlaIII_384-barcodes_154	TAGTCACCACGNNNNNNNNGATCGTCGGACTGTAGAACTCTGAACCCCTATAGTGAGTCGTATTACCGGCCTCAATCGAA
	NlaIII_384-barcodes_155	CAGTAGCCATANNNNNNNNGATCGTCGGACTGTAGAACTCTGAACCCCTATAGTGAGTCGTATTACCGGCCTCAATCGAA
	NlaIII_384-barcodes_156	CGAGAGGTACGNNNNNNNNGATCGTCGGACTGTAGAACTCTGAACCCCTATAGTGAGTCGTATTACCGGCCTCAATCGAA
	NlaIII_384-barcodes_157	GTGCGCGCATTNNNNNNNNGATCGTCGGACTGTAGAACTCTGAACCCCTATAGTGAGTCGTATTACCGGCCTCAATCGAA
	NlaIII_384-barcodes_158	TCTTAAGAGCANNNNNNNNGATCGTCGGACTGTAGAACTCTGAACCCCTATAGTGAGTCGTATTACCGGCCTCAATCGAA
	NlaIII_384-barcodes_159	TGGCATTGCTCNNNNNNNNGATCGTCGGACTGTAGAACTCTGAACCCCTATAGTGAGTCGTATTACCGGCCTCAATCGAA
	NlaIII_384-barcodes_160	GACCGGAAGCANNNNNNNNGATCGTCGGACTGTAGAACTCTGAACCCCTATAGTGAGTCGTATTACCGGCCTCAATCGAA
	NlaIII_384-barcodes_161	TGGTATGCACANNNNNNNNGATCGTCGGACTGTAGAACTCTGAACCCCTATAGTGAGTCGTATTACCGGCCTCAATCGAA
	NlaIII_384-barcodes_162	GCTCTTGGTGTNNNNNNNNGATCGTCGGACTGTAGAACTCTGAACCCCTATAGTGAGTCGTATTACCGGCCTCAATCGAA
	NlaIII_384-barcodes_163	TGTCGAGTGTANNNNNNNNGATCGTCGGACTGTAGAACTCTGAACCCCTATAGTGAGTCGTATTACCGGCCTCAATCGAA
	NlaIII_384-barcodes_164	ATGGCTTCTAGNNNNNNNNGATCGTCGGACTGTAGAACTCTGAACCCCTATAGTGAGTCGTATTACCGGCCTCAATCGAA
	NlaIII_384-barcodes_165	CCGTGGATCCANNNNNNNNGATCGTCGGACTGTAGAACTCTGAACCCCTATAGTGAGTCGTATTACCGGCCTCAATCGAA
	NlaIII_384-barcodes_166	CGCGCCTTACTNNNNNNNNGATCGTCGGACTGTAGAACTCTGAACCCCTATAGTGAGTCGTATTACCGGCCTCAATCGAA
	NlaIII_384-barcodes_167	GAAGTTAGACTNNNNNNNNGATCGTCGGACTGTAGAACTCTGAACCCCTATAGTGAGTCGTATTACCGGCCTCAATCGAA
	NlaIII_384-barcodes_168	GATGACATATGNNNNNNNNGATCGTCGGACTGTAGAACTCTGAACCCCTATAGTGAGTCGTATTACCGGCCTCAATCGAA
	NlaIII_384-barcodes_169	TTAGCTGGCCANNNNNNNNGATCGTCGGACTGTAGAACTCTGAACCCCTATAGTGAGTCGTATTACCGGCCTCAATCGAA
	NlaIII_384-barcodes_170	GGTGCCGACTANNNNNNNNGATCGTCGGACTGTAGAACTCTGAACCCCTATAGTGAGTCGTATTACCGGCCTCAATCGAA
	NlaIII_384-barcodes_171	TAACCAAGACANNNNNNNNGATCGTCGGACTGTAGAACTCTGAACCCCTATAGTGAGTCGTATTACCGGCCTCAATCGAA
	NlaIII_384-barcodes_172	CAGGCTTAATTNNNNNNNNGATCGTCGGACTGTAGAACTCTGAACCCCTATAGTGAGTCGTATTACCGGCCTCAATCGAA
	NlaIII_384-barcodes_173	CAGAGACAAGGNNNNNNNNGATCGTCGGACTGTAGAACTCTGAACCCCTATAGTGAGTCGTATTACCGGCCTCAATCGAA
	NlaIII_384-barcodes_174	GCGGAGCGATTNNNNNNNNGATCGTCGGACTGTAGAACTCTGAACCCCTATAGTGAGTCGTATTACCGGCCTCAATCGAA
	NlaIII_384-barcodes_175	AGCGCGATGATNNNNNNNNGATCGTCGGACTGTAGAACTCTGAACCCCTATAGTGAGTCGTATTACCGGCCTCAATCGAA
	NlaIII_384-barcodes_176	CTGTGTGTAGCNNNNNNNNGATCGTCGGACTGTAGAACTCTGAACCCCTATAGTGAGTCGTATTACCGGCCTCAATCGAA
	NlaIII_384-barcodes_177	AAGCTTGGAGANNNNNNNNGATCGTCGGACTGTAGAACTCTGAACCCCTATAGTGAGTCGTATTACCGGCCTCAATCGAA
	NlaIII_384-barcodes_178	GGCGTGAATTGNNNNNNNNGATCGTCGGACTGTAGAACTCTGAACCCCTATAGTGAGTCGTATTACCGGCCTCAATCGAA
	NlaIII_384-barcodes_179	AACACGCTAGCNNNNNNNNGATCGTCGGACTGTAGAACTCTGAACCCCTATAGTGAGTCGTATTACCGGCCTCAATCGAA
	NlaIII_384-barcodes_180	TTCGTAATGGCNNNNNNNNGATCGTCGGACTGTAGAACTCTGAACCCCTATAGTGAGTCGTATTACCGGCCTCAATCGAA
	NlaIII_384-barcodes_181	ATGAGCAAGCTNNNNNNNNGATCGTCGGACTGTAGAACTCTGAACCCCTATAGTGAGTCGTATTACCGGCCTCAATCGAA
	NlaIII_384-barcodes_182	TCCTGCACCACNNNNNNNNGATCGTCGGACTGTAGAACTCTGAACCCCTATAGTGAGTCGTATTACCGGCCTCAATCGAA
	NlaIII_384-barcodes_183	CCTTACTCACGNNNNNNNNGATCGTCGGACTGTAGAACTCTGAACCCCTATAGTGAGTCGTATTACCGGCCTCAATCGAA
	NlaIII_384-barcodes_184	GAGTCGTGGTGNNNNNNNNGATCGTCGGACTGTAGAACTCTGAACCCCTATAGTGAGTCGTATTACCGGCCTCAATCGAA
	NlaIII_384-barcodes_185	GCCTACGGAATNNNNNNNNGATCGTCGGACTGTAGAACTCTGAACCCCTATAGTGAGTCGTATTACCGGCCTCAATCGAA
	NlaIII_384-barcodes_186	CCGAGAAGTAANNNNNNNNGATCGTCGGACTGTAGAACTCTGAACCCCTATAGTGAGTCGTATTACCGGCCTCAATCGAA
	NlaIII_384-barcodes_187	TTGGCGAGCTTNNNNNNNNGATCGTCGGACTGTAGAACTCTGAACCCCTATAGTGAGTCGTATTACCGGCCTCAATCGAA
	NlaIII_384-barcodes_188	CTGTATCGGCCNNNNNNNNGATCGTCGGACTGTAGAACTCTGAACCCCTATAGTGAGTCGTATTACCGGCCTCAATCGAA
	NlaIII_384-barcodes_189	TGCGAATGTAANNNNNNNNGATCGTCGGACTGTAGAACTCTGAACCCCTATAGTGAGTCGTATTACCGGCCTCAATCGAA
	NlaIII_384-barcodes_190	TGACTAGTTCGNNNNNNNNGATCGTCGGACTGTAGAACTCTGAACCCCTATAGTGAGTCGTATTACCGGCCTCAATCGAA
	NlaIII_384-barcodes_191	ACCTAGAGTGCNNNNNNNNGATCGTCGGACTGTAGAACTCTGAACCCCTATAGTGAGTCGTATTACCGGCCTCAATCGAA
	NlaIII_384-barcodes_192	TATCCGAAGGTNNNNNNNNGATCGTCGGACTGTAGAACTCTGAACCCCTATAGTGAGTCGTATTACCGGCCTCAATCGAA
	NlaIII_384-barcodes_193	AGTAGCGGACANNNNNNNNGATCGTCGGACTGTAGAACTCTGAACCCCTATAGTGAGTCGTATTACCGGCCTCAATCGAA
	NlaIII_384-barcodes_194	CTATCCACCGANNNNNNNNGATCGTCGGACTGTAGAACTCTGAACCCCTATAGTGAGTCGTATTACCGGCCTCAATCGAA
	NlaIII_384-barcodes_195	CACGCTCCTAANNNNNNNNGATCGTCGGACTGTAGAACTCTGAACCCCTATAGTGAGTCGTATTACCGGCCTCAATCGAA
	NlaIII_384-barcodes_196	TAAGCGCATACNNNNNNNNGATCGTCGGACTGTAGAACTCTGAACCCCTATAGTGAGTCGTATTACCGGCCTCAATCGAA
	NlaIII_384-barcodes_197	GTTCACAATACNNNNNNNNGATCGTCGGACTGTAGAACTCTGAACCCCTATAGTGAGTCGTATTACCGGCCTCAATCGAA
	NlaIII_384-barcodes_198	TAGAGTGATACNNNNNNNNGATCGTCGGACTGTAGAACTCTGAACCCCTATAGTGAGTCGTATTACCGGCCTCAATCGAA
	NlaIII_384-barcodes_199	ACGGACTCTTCNNNNNNNNGATCGTCGGACTGTAGAACTCTGAACCCCTATAGTGAGTCGTATTACCGGCCTCAATCGAA
	NlaIII_384-barcodes_200	GAGTTGAAGATNNNNNNNNGATCGTCGGACTGTAGAACTCTGAACCCCTATAGTGAGTCGTATTACCGGCCTCAATCGAA
	NlaIII_384-barcodes_201	CAAGTCGTGGTNNNNNNNNGATCGTCGGACTGTAGAACTCTGAACCCCTATAGTGAGTCGTATTACCGGCCTCAATCGAA
	NlaIII_384-barcodes_202	TAGCTATAGAGNNNNNNNNGATCGTCGGACTGTAGAACTCTGAACCCCTATAGTGAGTCGTATTACCGGCCTCAATCGAA
	NlaIII_384-barcodes_203	GTCTCTTACAGNNNNNNNNGATCGTCGGACTGTAGAACTCTGAACCCCTATAGTGAGTCGTATTACCGGCCTCAATCGAA
	NlaIII_384-barcodes_204	CCGCTTCGTTCNNNNNNNNGATCGTCGGACTGTAGAACTCTGAACCCCTATAGTGAGTCGTATTACCGGCCTCAATCGAA
	NlaIII_384-barcodes_205	TCCAGACTCGTNNNNNNNNGATCGTCGGACTGTAGAACTCTGAACCCCTATAGTGAGTCGTATTACCGGCCTCAATCGAA
	NlaIII_384-barcodes_206	TCTGGACAATCNNNNNNNNGATCGTCGGACTGTAGAACTCTGAACCCCTATAGTGAGTCGTATTACCGGCCTCAATCGAA
	NlaIII_384-barcodes_207	GCTACGAGTGGNNNNNNNNGATCGTCGGACTGTAGAACTCTGAACCCCTATAGTGAGTCGTATTACCGGCCTCAATCGAA
	NlaIII_384-barcodes_208	GATGCGTCTTANNNNNNNNGATCGTCGGACTGTAGAACTCTGAACCCCTATAGTGAGTCGTATTACCGGCCTCAATCGAA
	NlaIII_384-barcodes_209	ATCGAGTACTGNNNNNNNNGATCGTCGGACTGTAGAACTCTGAACCCCTATAGTGAGTCGTATTACCGGCCTCAATCGAA
	NlaIII_384-barcodes_210	ATCCACCAACTNNNNNNNNGATCGTCGGACTGTAGAACTCTGAACCCCTATAGTGAGTCGTATTACCGGCCTCAATCGAA
	NlaIII_384-barcodes_211	AGTCCAAGGTCNNNNNNNNGATCGTCGGACTGTAGAACTCTGAACCCCTATAGTGAGTCGTATTACCGGCCTCAATCGAA
	NlaIII_384-barcodes_212	TCTGGTAGTTANNNNNNNNGATCGTCGGACTGTAGAACTCTGAACCCCTATAGTGAGTCGTATTACCGGCCTCAATCGAA
	NlaIII_384-barcodes_213	AGACGCTCGGTNNNNNNNNGATCGTCGGACTGTAGAACTCTGAACCCCTATAGTGAGTCGTATTACCGGCCTCAATCGAA
	NlaIII_384-barcodes_214	ACGTCTTCATANNNNNNNNGATCGTCGGACTGTAGAACTCTGAACCCCTATAGTGAGTCGTATTACCGGCCTCAATCGAA
	NlaIII_384-barcodes_215	CCAGACGATATNNNNNNNNGATCGTCGGACTGTAGAACTCTGAACCCCTATAGTGAGTCGTATTACCGGCCTCAATCGAA
	NlaIII_384-barcodes_216	ACTCTGTATTGNNNNNNNNGATCGTCGGACTGTAGAACTCTGAACCCCTATAGTGAGTCGTATTACCGGCCTCAATCGAA
	NlaIII_384-barcodes_217	CAGAACGTGCGNNNNNNNNGATCGTCGGACTGTAGAACTCTGAACCCCTATAGTGAGTCGTATTACCGGCCTCAATCGAA
	NlaIII_384-barcodes_218	CGGACATATCCNNNNNNNNGATCGTCGGACTGTAGAACTCTGAACCCCTATAGTGAGTCGTATTACCGGCCTCAATCGAA
	NlaIII_384-barcodes_219	ACAGATGTCGANNNNNNNNGATCGTCGGACTGTAGAACTCTGAACCCCTATAGTGAGTCGTATTACCGGCCTCAATCGAA
	NlaIII_384-barcodes_220	GTGTCGTCTCTNNNNNNNNGATCGTCGGACTGTAGAACTCTGAACCCCTATAGTGAGTCGTATTACCGGCCTCAATCGAA
	NlaIII_384-barcodes_221	CTATGTTGTGANNNNNNNNGATCGTCGGACTGTAGAACTCTGAACCCCTATAGTGAGTCGTATTACCGGCCTCAATCGAA
	NlaIII_384-barcodes_222	ACATCACTCAGNNNNNNNNGATCGTCGGACTGTAGAACTCTGAACCCCTATAGTGAGTCGTATTACCGGCCTCAATCGAA
	NlaIII_384-barcodes_223	TAATTCCAGTGNNNNNNNNGATCGTCGGACTGTAGAACTCTGAACCCCTATAGTGAGTCGTATTACCGGCCTCAATCGAA
	NlaIII_384-barcodes_224	AACTGCTCGCANNNNNNNNGATCGTCGGACTGTAGAACTCTGAACCCCTATAGTGAGTCGTATTACCGGCCTCAATCGAA
	NlaIII_384-barcodes_225	GTATGAACTCANNNNNNNNGATCGTCGGACTGTAGAACTCTGAACCCCTATAGTGAGTCGTATTACCGGCCTCAATCGAA
	NlaIII_384-barcodes_226	CTTCATACCTANNNNNNNNGATCGTCGGACTGTAGAACTCTGAACCCCTATAGTGAGTCGTATTACCGGCCTCAATCGAA
	NlaIII_384-barcodes_227	AGCATAGCAAGNNNNNNNNGATCGTCGGACTGTAGAACTCTGAACCCCTATAGTGAGTCGTATTACCGGCCTCAATCGAA
	NlaIII_384-barcodes_228	ACATGCGCTTGNNNNNNNNGATCGTCGGACTGTAGAACTCTGAACCCCTATAGTGAGTCGTATTACCGGCCTCAATCGAA
	NlaIII_384-barcodes_229	GGTACGTAACANNNNNNNNGATCGTCGGACTGTAGAACTCTGAACCCCTATAGTGAGTCGTATTACCGGCCTCAATCGAA
	NlaIII_384-barcodes_230	ACGTACCATGANNNNNNNNGATCGTCGGACTGTAGAACTCTGAACCCCTATAGTGAGTCGTATTACCGGCCTCAATCGAA
	NlaIII_384-barcodes_231	TACACCAACCGNNNNNNNNGATCGTCGGACTGTAGAACTCTGAACCCCTATAGTGAGTCGTATTACCGGCCTCAATCGAA
	NlaIII_384-barcodes_232	GCCGATACTATNNNNNNNNGATCGTCGGACTGTAGAACTCTGAACCCCTATAGTGAGTCGTATTACCGGCCTCAATCGAA
	NlaIII_384-barcodes_233	CGCCGACTTAANNNNNNNNGATCGTCGGACTGTAGAACTCTGAACCCCTATAGTGAGTCGTATTACCGGCCTCAATCGAA
	NlaIII_384-barcodes_234	CAACGAATATGNNNNNNNNGATCGTCGGACTGTAGAACTCTGAACCCCTATAGTGAGTCGTATTACCGGCCTCAATCGAA
	NlaIII_384-barcodes_235	CAGTGCACGGTNNNNNNNNGATCGTCGGACTGTAGAACTCTGAACCCCTATAGTGAGTCGTATTACCGGCCTCAATCGAA
	NlaIII_384-barcodes_236	TCCGATTCGTANNNNNNNNGATCGTCGGACTGTAGAACTCTGAACCCCTATAGTGAGTCGTATTACCGGCCTCAATCGAA
	NlaIII_384-barcodes_237	TTACTAACAGGNNNNNNNNGATCGTCGGACTGTAGAACTCTGAACCCCTATAGTGAGTCGTATTACCGGCCTCAATCGAA
	NlaIII_384-barcodes_238	TACCGTCTCCANNNNNNNNGATCGTCGGACTGTAGAACTCTGAACCCCTATAGTGAGTCGTATTACCGGCCTCAATCGAA
	NlaIII_384-barcodes_239	GGCCTACACGANNNNNNNNGATCGTCGGACTGTAGAACTCTGAACCCCTATAGTGAGTCGTATTACCGGCCTCAATCGAA
	NlaIII_384-barcodes_240	GAACCATATTGNNNNNNNNGATCGTCGGACTGTAGAACTCTGAACCCCTATAGTGAGTCGTATTACCGGCCTCAATCGAA
	NlaIII_384-barcodes_241	CTGGAAGACGGNNNNNNNNGATCGTCGGACTGTAGAACTCTGAACCCCTATAGTGAGTCGTATTACCGGCCTCAATCGAA
	NlaIII_384-barcodes_242	GCCTCATGTTCNNNNNNNNGATCGTCGGACTGTAGAACTCTGAACCCCTATAGTGAGTCGTATTACCGGCCTCAATCGAA
	NlaIII_384-barcodes_243	ACGTCCGAGACNNNNNNNNGATCGTCGGACTGTAGAACTCTGAACCCCTATAGTGAGTCGTATTACCGGCCTCAATCGAA
	NlaIII_384-barcodes_244	AGTGACGCAACNNNNNNNNGATCGTCGGACTGTAGAACTCTGAACCCCTATAGTGAGTCGTATTACCGGCCTCAATCGAA
	NlaIII_384-barcodes_245	CGCCAATAGCGNNNNNNNNGATCGTCGGACTGTAGAACTCTGAACCCCTATAGTGAGTCGTATTACCGGCCTCAATCGAA
	NlaIII_384-barcodes_246	ACGAATCTGATNNNNNNNNGATCGTCGGACTGTAGAACTCTGAACCCCTATAGTGAGTCGTATTACCGGCCTCAATCGAA
	NlaIII_384-barcodes_247	ATTCGACGTCANNNNNNNNGATCGTCGGACTGTAGAACTCTGAACCCCTATAGTGAGTCGTATTACCGGCCTCAATCGAA
	NlaIII_384-barcodes_248	GCGAGGATATCNNNNNNNNGATCGTCGGACTGTAGAACTCTGAACCCCTATAGTGAGTCGTATTACCGGCCTCAATCGAA
	NlaIII_384-barcodes_249	GTAGTCACGCGNNNNNNNNGATCGTCGGACTGTAGAACTCTGAACCCCTATAGTGAGTCGTATTACCGGCCTCAATCGAA
	NlaIII_384-barcodes_250	ATACATTCCGCNNNNNNNNGATCGTCGGACTGTAGAACTCTGAACCCCTATAGTGAGTCGTATTACCGGCCTCAATCGAA
	NlaIII_384-barcodes_251	GGCCGGTATACNNNNNNNNGATCGTCGGACTGTAGAACTCTGAACCCCTATAGTGAGTCGTATTACCGGCCTCAATCGAA
	NlaIII_384-barcodes_252	CGCTGAAGGACNNNNNNNNGATCGTCGGACTGTAGAACTCTGAACCCCTATAGTGAGTCGTATTACCGGCCTCAATCGAA
	NlaIII_384-barcodes_253	TACGGAAGTCGNNNNNNNNGATCGTCGGACTGTAGAACTCTGAACCCCTATAGTGAGTCGTATTACCGGCCTCAATCGAA
	NlaIII_384-barcodes_254	CAGGTCTCGTGNNNNNNNNGATCGTCGGACTGTAGAACTCTGAACCCCTATAGTGAGTCGTATTACCGGCCTCAATCGAA
	NlaIII_384-barcodes_255	CGGTTAGCCGANNNNNNNNGATCGTCGGACTGTAGAACTCTGAACCCCTATAGTGAGTCGTATTACCGGCCTCAATCGAA
	NlaIII_384-barcodes_256	CCAGTGCTTGCNNNNNNNNGATCGTCGGACTGTAGAACTCTGAACCCCTATAGTGAGTCGTATTACCGGCCTCAATCGAA
	NlaIII_384-barcodes_257	AGGCGCCACTANNNNNNNNGATCGTCGGACTGTAGAACTCTGAACCCCTATAGTGAGTCGTATTACCGGCCTCAATCGAA
	NlaIII_384-barcodes_258	TTAAGGAGTGCNNNNNNNNGATCGTCGGACTGTAGAACTCTGAACCCCTATAGTGAGTCGTATTACCGGCCTCAATCGAA
	NlaIII_384-barcodes_259	GAGCAGGAGTCNNNNNNNNGATCGTCGGACTGTAGAACTCTGAACCCCTATAGTGAGTCGTATTACCGGCCTCAATCGAA
	NlaIII_384-barcodes_260	TATCGGCCACTNNNNNNNNGATCGTCGGACTGTAGAACTCTGAACCCCTATAGTGAGTCGTATTACCGGCCTCAATCGAA
	NlaIII_384-barcodes_261	TTAGATGATGCNNNNNNNNGATCGTCGGACTGTAGAACTCTGAACCCCTATAGTGAGTCGTATTACCGGCCTCAATCGAA
	NlaIII_384-barcodes_262	GTACGTGTGCCNNNNNNNNGATCGTCGGACTGTAGAACTCTGAACCCCTATAGTGAGTCGTATTACCGGCCTCAATCGAA
	NlaIII_384-barcodes_263	TGATCACGTTGNNNNNNNNGATCGTCGGACTGTAGAACTCTGAACCCCTATAGTGAGTCGTATTACCGGCCTCAATCGAA
	NlaIII_384-barcodes_264	TCAGTCGAAGANNNNNNNNGATCGTCGGACTGTAGAACTCTGAACCCCTATAGTGAGTCGTATTACCGGCCTCAATCGAA
	NlaIII_384-barcodes_265	CATTCCAGAACNNNNNNNNGATCGTCGGACTGTAGAACTCTGAACCCCTATAGTGAGTCGTATTACCGGCCTCAATCGAA
	NlaIII_384-barcodes_266	CCGCTAGAACGNNNNNNNNGATCGTCGGACTGTAGAACTCTGAACCCCTATAGTGAGTCGTATTACCGGCCTCAATCGAA
	NlaIII_384-barcodes_267	AATACTTGCGCNNNNNNNNGATCGTCGGACTGTAGAACTCTGAACCCCTATAGTGAGTCGTATTACCGGCCTCAATCGAA
	NlaIII_384-barcodes_268	TCTCATCTATGNNNNNNNNGATCGTCGGACTGTAGAACTCTGAACCCCTATAGTGAGTCGTATTACCGGCCTCAATCGAA
	NlaIII_384-barcodes_269	TGCACTCTGTTNNNNNNNNGATCGTCGGACTGTAGAACTCTGAACCCCTATAGTGAGTCGTATTACCGGCCTCAATCGAA
	NlaIII_384-barcodes_270	TTGATCTTGGTNNNNNNNNGATCGTCGGACTGTAGAACTCTGAACCCCTATAGTGAGTCGTATTACCGGCCTCAATCGAA
	NlaIII_384-barcodes_271	CTAGTTGCAACNNNNNNNNGATCGTCGGACTGTAGAACTCTGAACCCCTATAGTGAGTCGTATTACCGGCCTCAATCGAA
	NlaIII_384-barcodes_272	ACATTGTTCCTNNNNNNNNGATCGTCGGACTGTAGAACTCTGAACCCCTATAGTGAGTCGTATTACCGGCCTCAATCGAA
	NlaIII_384-barcodes_273	TGCCTCATCTANNNNNNNNGATCGTCGGACTGTAGAACTCTGAACCCCTATAGTGAGTCGTATTACCGGCCTCAATCGAA
	NlaIII_384-barcodes_274	TGGACAATTGGNNNNNNNNGATCGTCGGACTGTAGAACTCTGAACCCCTATAGTGAGTCGTATTACCGGCCTCAATCGAA
	NlaIII_384-barcodes_275	GACGATTGTGCNNNNNNNNGATCGTCGGACTGTAGAACTCTGAACCCCTATAGTGAGTCGTATTACCGGCCTCAATCGAA
	NlaIII_384-barcodes_276	TTCTAGTGACTNNNNNNNNGATCGTCGGACTGTAGAACTCTGAACCCCTATAGTGAGTCGTATTACCGGCCTCAATCGAA
	NlaIII_384-barcodes_277	GCTGTGTCACTNNNNNNNNGATCGTCGGACTGTAGAACTCTGAACCCCTATAGTGAGTCGTATTACCGGCCTCAATCGAA
	NlaIII_384-barcodes_278	GTATCAGACTTNNNNNNNNGATCGTCGGACTGTAGAACTCTGAACCCCTATAGTGAGTCGTATTACCGGCCTCAATCGAA
	NlaIII_384-barcodes_279	GAGGAATTCTTNNNNNNNNGATCGTCGGACTGTAGAACTCTGAACCCCTATAGTGAGTCGTATTACCGGCCTCAATCGAA
	NlaIII_384-barcodes_280	TCAGACCACCGNNNNNNNNGATCGTCGGACTGTAGAACTCTGAACCCCTATAGTGAGTCGTATTACCGGCCTCAATCGAA
	NlaIII_384-barcodes_281	ATTAACACTCGNNNNNNNNGATCGTCGGACTGTAGAACTCTGAACCCCTATAGTGAGTCGTATTACCGGCCTCAATCGAA
	NlaIII_384-barcodes_282	GCTCCTATTCANNNNNNNNGATCGTCGGACTGTAGAACTCTGAACCCCTATAGTGAGTCGTATTACCGGCCTCAATCGAA
	NlaIII_384-barcodes_283	GGTTAGCTGCTNNNNNNNNGATCGTCGGACTGTAGAACTCTGAACCCCTATAGTGAGTCGTATTACCGGCCTCAATCGAA
	NlaIII_384-barcodes_284	TAGACTAGTCTNNNNNNNNGATCGTCGGACTGTAGAACTCTGAACCCCTATAGTGAGTCGTATTACCGGCCTCAATCGAA
	NlaIII_384-barcodes_285	GGAGATCAATCNNNNNNNNGATCGTCGGACTGTAGAACTCTGAACCCCTATAGTGAGTCGTATTACCGGCCTCAATCGAA
	NlaIII_384-barcodes_286	GTGCATTAATGNNNNNNNNGATCGTCGGACTGTAGAACTCTGAACCCCTATAGTGAGTCGTATTACCGGCCTCAATCGAA
	NlaIII_384-barcodes_287	AGGAAGTCGTANNNNNNNNGATCGTCGGACTGTAGAACTCTGAACCCCTATAGTGAGTCGTATTACCGGCCTCAATCGAA
	NlaIII_384-barcodes_288	GTGATTGTGAANNNNNNNNGATCGTCGGACTGTAGAACTCTGAACCCCTATAGTGAGTCGTATTACCGGCCTCAATCGAA
	NlaIII_384-barcodes_289	CGGCCTAGGAANNNNNNNNGATCGTCGGACTGTAGAACTCTGAACCCCTATAGTGAGTCGTATTACCGGCCTCAATCGAA
	NlaIII_384-barcodes_290	CTCCACTTCCANNNNNNNNGATCGTCGGACTGTAGAACTCTGAACCCCTATAGTGAGTCGTATTACCGGCCTCAATCGAA
	NlaIII_384-barcodes_291	CGTTCATCGCTNNNNNNNNGATCGTCGGACTGTAGAACTCTGAACCCCTATAGTGAGTCGTATTACCGGCCTCAATCGAA
	NlaIII_384-barcodes_292	GATCGCAGCGTNNNNNNNNGATCGTCGGACTGTAGAACTCTGAACCCCTATAGTGAGTCGTATTACCGGCCTCAATCGAA
	NlaIII_384-barcodes_293	GCTCTAGTGAGNNNNNNNNGATCGTCGGACTGTAGAACTCTGAACCCCTATAGTGAGTCGTATTACCGGCCTCAATCGAA
	NlaIII_384-barcodes_294	GTTATCCGTATNNNNNNNNGATCGTCGGACTGTAGAACTCTGAACCCCTATAGTGAGTCGTATTACCGGCCTCAATCGAA
	NlaIII_384-barcodes_295	AGGTCCAATCGNNNNNNNNGATCGTCGGACTGTAGAACTCTGAACCCCTATAGTGAGTCGTATTACCGGCCTCAATCGAA
	NlaIII_384-barcodes_296	TCGCTTATCAGNNNNNNNNGATCGTCGGACTGTAGAACTCTGAACCCCTATAGTGAGTCGTATTACCGGCCTCAATCGAA
	NlaIII_384-barcodes_297	TGCATCCATAANNNNNNNNGATCGTCGGACTGTAGAACTCTGAACCCCTATAGTGAGTCGTATTACCGGCCTCAATCGAA
	NlaIII_384-barcodes_298	TGCAGATCACANNNNNNNNGATCGTCGGACTGTAGAACTCTGAACCCCTATAGTGAGTCGTATTACCGGCCTCAATCGAA
	NlaIII_384-barcodes_299	TTGGCGCAAGANNNNNNNNGATCGTCGGACTGTAGAACTCTGAACCCCTATAGTGAGTCGTATTACCGGCCTCAATCGAA
	NlaIII_384-barcodes_300	ATGGTCGCCAANNNNNNNNGATCGTCGGACTGTAGAACTCTGAACCCCTATAGTGAGTCGTATTACCGGCCTCAATCGAA
	NlaIII_384-barcodes_301	TACAACCGAGTNNNNNNNNGATCGTCGGACTGTAGAACTCTGAACCCCTATAGTGAGTCGTATTACCGGCCTCAATCGAA
	NlaIII_384-barcodes_302	TGTACCGGTACNNNNNNNNGATCGTCGGACTGTAGAACTCTGAACCCCTATAGTGAGTCGTATTACCGGCCTCAATCGAA
	NlaIII_384-barcodes_303	TTGATACGCCANNNNNNNNGATCGTCGGACTGTAGAACTCTGAACCCCTATAGTGAGTCGTATTACCGGCCTCAATCGAA
	NlaIII_384-barcodes_304	CGATGCTAGCCNNNNNNNNGATCGTCGGACTGTAGAACTCTGAACCCCTATAGTGAGTCGTATTACCGGCCTCAATCGAA
	NlaIII_384-barcodes_305	CTATGCTTAAGNNNNNNNNGATCGTCGGACTGTAGAACTCTGAACCCCTATAGTGAGTCGTATTACCGGCCTCAATCGAA
	NlaIII_384-barcodes_306	TTCCTCTAGTCNNNNNNNNGATCGTCGGACTGTAGAACTCTGAACCCCTATAGTGAGTCGTATTACCGGCCTCAATCGAA
	NlaIII_384-barcodes_307	ATGGATCTTCANNNNNNNNGATCGTCGGACTGTAGAACTCTGAACCCCTATAGTGAGTCGTATTACCGGCCTCAATCGAA
	NlaIII_384-barcodes_308	GTCATTGCTTGNNNNNNNNGATCGTCGGACTGTAGAACTCTGAACCCCTATAGTGAGTCGTATTACCGGCCTCAATCGAA
	NlaIII_384-barcodes_309	ATGACATTGCGNNNNNNNNGATCGTCGGACTGTAGAACTCTGAACCCCTATAGTGAGTCGTATTACCGGCCTCAATCGAA
	NlaIII_384-barcodes_310	CGCACGATTCANNNNNNNNGATCGTCGGACTGTAGAACTCTGAACCCCTATAGTGAGTCGTATTACCGGCCTCAATCGAA
	NlaIII_384-barcodes_311	TTGTGATCTGCNNNNNNNNGATCGTCGGACTGTAGAACTCTGAACCCCTATAGTGAGTCGTATTACCGGCCTCAATCGAA
	NlaIII_384-barcodes_312	AAGCGTGTCTGNNNNNNNNGATCGTCGGACTGTAGAACTCTGAACCCCTATAGTGAGTCGTATTACCGGCCTCAATCGAA
	NlaIII_384-barcodes_313	TCGTATGTCTTNNNNNNNNGATCGTCGGACTGTAGAACTCTGAACCCCTATAGTGAGTCGTATTACCGGCCTCAATCGAA
	NlaIII_384-barcodes_314	AATGCGGTCCTNNNNNNNNGATCGTCGGACTGTAGAACTCTGAACCCCTATAGTGAGTCGTATTACCGGCCTCAATCGAA
	NlaIII_384-barcodes_315	CAGTTCTTACANNNNNNNNGATCGTCGGACTGTAGAACTCTGAACCCCTATAGTGAGTCGTATTACCGGCCTCAATCGAA
	NlaIII_384-barcodes_316	AGTTCACTAGANNNNNNNNGATCGTCGGACTGTAGAACTCTGAACCCCTATAGTGAGTCGTATTACCGGCCTCAATCGAA
	NlaIII_384-barcodes_317	AAGTGTACAACNNNNNNNNGATCGTCGGACTGTAGAACTCTGAACCCCTATAGTGAGTCGTATTACCGGCCTCAATCGAA
	NlaIII_384-barcodes_318	TAACGGAGCAGNNNNNNNNGATCGTCGGACTGTAGAACTCTGAACCCCTATAGTGAGTCGTATTACCGGCCTCAATCGAA
	NlaIII_384-barcodes_319	TAAGGTCTTGGNNNNNNNNGATCGTCGGACTGTAGAACTCTGAACCCCTATAGTGAGTCGTATTACCGGCCTCAATCGAA
	NlaIII_384-barcodes_320	ATGACTGCCTTNNNNNNNNGATCGTCGGACTGTAGAACTCTGAACCCCTATAGTGAGTCGTATTACCGGCCTCAATCGAA
	NlaIII_384-barcodes_321	CGGATGCCAGTNNNNNNNNGATCGTCGGACTGTAGAACTCTGAACCCCTATAGTGAGTCGTATTACCGGCCTCAATCGAA
	NlaIII_384-barcodes_322	CTAGACAGCAGNNNNNNNNGATCGTCGGACTGTAGAACTCTGAACCCCTATAGTGAGTCGTATTACCGGCCTCAATCGAA
	NlaIII_384-barcodes_323	GAATTAGGCAGNNNNNNNNGATCGTCGGACTGTAGAACTCTGAACCCCTATAGTGAGTCGTATTACCGGCCTCAATCGAA
	NlaIII_384-barcodes_324	TATGAAGGTTCNNNNNNNNGATCGTCGGACTGTAGAACTCTGAACCCCTATAGTGAGTCGTATTACCGGCCTCAATCGAA
	NlaIII_384-barcodes_325	CTTGCGTGACCNNNNNNNNGATCGTCGGACTGTAGAACTCTGAACCCCTATAGTGAGTCGTATTACCGGCCTCAATCGAA
	NlaIII_384-barcodes_326	AGGTGACCGTCNNNNNNNNGATCGTCGGACTGTAGAACTCTGAACCCCTATAGTGAGTCGTATTACCGGCCTCAATCGAA
	NlaIII_384-barcodes_327	ACAGCCATAACNNNNNNNNGATCGTCGGACTGTAGAACTCTGAACCCCTATAGTGAGTCGTATTACCGGCCTCAATCGAA
	NlaIII_384-barcodes_328	CCTAGACCGACNNNNNNNNGATCGTCGGACTGTAGAACTCTGAACCCCTATAGTGAGTCGTATTACCGGCCTCAATCGAA
	NlaIII_384-barcodes_329	GCCAGGTCTGANNNNNNNNGATCGTCGGACTGTAGAACTCTGAACCCCTATAGTGAGTCGTATTACCGGCCTCAATCGAA
	NlaIII_384-barcodes_330	CGATCTCCGTANNNNNNNNGATCGTCGGACTGTAGAACTCTGAACCCCTATAGTGAGTCGTATTACCGGCCTCAATCGAA
	NlaIII_384-barcodes_331	GCACGATGATANNNNNNNNGATCGTCGGACTGTAGAACTCTGAACCCCTATAGTGAGTCGTATTACCGGCCTCAATCGAA
	NlaIII_384-barcodes_332	CACCAGTGGACNNNNNNNNGATCGTCGGACTGTAGAACTCTGAACCCCTATAGTGAGTCGTATTACCGGCCTCAATCGAA
	NlaIII_384-barcodes_333	TAAGAGTGATGNNNNNNNNGATCGTCGGACTGTAGAACTCTGAACCCCTATAGTGAGTCGTATTACCGGCCTCAATCGAA
	NlaIII_384-barcodes_334	GCAACGGAGTGNNNNNNNNGATCGTCGGACTGTAGAACTCTGAACCCCTATAGTGAGTCGTATTACCGGCCTCAATCGAA
	NlaIII_384-barcodes_335	CGCGGTTGATANNNNNNNNGATCGTCGGACTGTAGAACTCTGAACCCCTATAGTGAGTCGTATTACCGGCCTCAATCGAA
	NlaIII_384-barcodes_336	ACCGCCAAGTANNNNNNNNGATCGTCGGACTGTAGAACTCTGAACCCCTATAGTGAGTCGTATTACCGGCCTCAATCGAA
	NlaIII_384-barcodes_337	CAAGAACAACANNNNNNNNGATCGTCGGACTGTAGAACTCTGAACCCCTATAGTGAGTCGTATTACCGGCCTCAATCGAA
	NlaIII_384-barcodes_338	AGAAGAACCATNNNNNNNNGATCGTCGGACTGTAGAACTCTGAACCCCTATAGTGAGTCGTATTACCGGCCTCAATCGAA
	NlaIII_384-barcodes_339	CGAACTGACCTNNNNNNNNGATCGTCGGACTGTAGAACTCTGAACCCCTATAGTGAGTCGTATTACCGGCCTCAATCGAA
	NlaIII_384-barcodes_340	GTATACCGAGANNNNNNNNGATCGTCGGACTGTAGAACTCTGAACCCCTATAGTGAGTCGTATTACCGGCCTCAATCGAA
	NlaIII_384-barcodes_341	AGTAGTATGACNNNNNNNNGATCGTCGGACTGTAGAACTCTGAACCCCTATAGTGAGTCGTATTACCGGCCTCAATCGAA
	NlaIII_384-barcodes_342	GACCTGCTTCGNNNNNNNNGATCGTCGGACTGTAGAACTCTGAACCCCTATAGTGAGTCGTATTACCGGCCTCAATCGAA
	NlaIII_384-barcodes_343	CGTACCTCTGANNNNNNNNGATCGTCGGACTGTAGAACTCTGAACCCCTATAGTGAGTCGTATTACCGGCCTCAATCGAA
	NlaIII_384-barcodes_344	GTCGATCTAAGNNNNNNNNGATCGTCGGACTGTAGAACTCTGAACCCCTATAGTGAGTCGTATTACCGGCCTCAATCGAA
	NlaIII_384-barcodes_345	GATAGCTGATCNNNNNNNNGATCGTCGGACTGTAGAACTCTGAACCCCTATAGTGAGTCGTATTACCGGCCTCAATCGAA
	NlaIII_384-barcodes_346	ACCAGGCCATGNNNNNNNNGATCGTCGGACTGTAGAACTCTGAACCCCTATAGTGAGTCGTATTACCGGCCTCAATCGAA
	NlaIII_384-barcodes_347	GCGGATAAGGANNNNNNNNGATCGTCGGACTGTAGAACTCTGAACCCCTATAGTGAGTCGTATTACCGGCCTCAATCGAA
	NlaIII_384-barcodes_348	AACGGCTGCTTNNNNNNNNGATCGTCGGACTGTAGAACTCTGAACCCCTATAGTGAGTCGTATTACCGGCCTCAATCGAA
	NlaIII_384-barcodes_349	GAAGGCGACACNNNNNNNNGATCGTCGGACTGTAGAACTCTGAACCCCTATAGTGAGTCGTATTACCGGCCTCAATCGAA
	NlaIII_384-barcodes_350	ATAGTACGCACNNNNNNNNGATCGTCGGACTGTAGAACTCTGAACCCCTATAGTGAGTCGTATTACCGGCCTCAATCGAA
	NlaIII_384-barcodes_351	TTCGTGTCTCGNNNNNNNNGATCGTCGGACTGTAGAACTCTGAACCCCTATAGTGAGTCGTATTACCGGCCTCAATCGAA
	NlaIII_384-barcodes_352	ACCAATCGCCGNNNNNNNNGATCGTCGGACTGTAGAACTCTGAACCCCTATAGTGAGTCGTATTACCGGCCTCAATCGAA
	NlaIII_384-barcodes_353	GAGTCAGATAANNNNNNNNGATCGTCGGACTGTAGAACTCTGAACCCCTATAGTGAGTCGTATTACCGGCCTCAATCGAA
	NlaIII_384-barcodes_354	AATTGCGGTGCNNNNNNNNGATCGTCGGACTGTAGAACTCTGAACCCCTATAGTGAGTCGTATTACCGGCCTCAATCGAA
	NlaIII_384-barcodes_355	TGTTCTCAGACNNNNNNNNGATCGTCGGACTGTAGAACTCTGAACCCCTATAGTGAGTCGTATTACCGGCCTCAATCGAA
	NlaIII_384-barcodes_356	TGTGTTAGCGGNNNNNNNNGATCGTCGGACTGTAGAACTCTGAACCCCTATAGTGAGTCGTATTACCGGCCTCAATCGAA
	NlaIII_384-barcodes_357	CATCATTGCCTNNNNNNNNGATCGTCGGACTGTAGAACTCTGAACCCCTATAGTGAGTCGTATTACCGGCCTCAATCGAA
	NlaIII_384-barcodes_358	TGTGAGACATTNNNNNNNNGATCGTCGGACTGTAGAACTCTGAACCCCTATAGTGAGTCGTATTACCGGCCTCAATCGAA
	NlaIII_384-barcodes_359	TGTTCCTTCAGNNNNNNNNGATCGTCGGACTGTAGAACTCTGAACCCCTATAGTGAGTCGTATTACCGGCCTCAATCGAA
	NlaIII_384-barcodes_360	AAGCCACAGCCNNNNNNNNGATCGTCGGACTGTAGAACTCTGAACCCCTATAGTGAGTCGTATTACCGGCCTCAATCGAA
	NlaIII_384-barcodes_361	GTTCCACCATGNNNNNNNNGATCGTCGGACTGTAGAACTCTGAACCCCTATAGTGAGTCGTATTACCGGCCTCAATCGAA
	NlaIII_384-barcodes_362	CCGGTGAGAACNNNNNNNNGATCGTCGGACTGTAGAACTCTGAACCCCTATAGTGAGTCGTATTACCGGCCTCAATCGAA
	NlaIII_384-barcodes_363	ATAAGAGCGGANNNNNNNNGATCGTCGGACTGTAGAACTCTGAACCCCTATAGTGAGTCGTATTACCGGCCTCAATCGAA
	NlaIII_384-barcodes_364	ACTCCTCGGCTNNNNNNNNGATCGTCGGACTGTAGAACTCTGAACCCCTATAGTGAGTCGTATTACCGGCCTCAATCGAA
	NlaIII_384-barcodes_365	TAGAAGCTCAANNNNNNNNGATCGTCGGACTGTAGAACTCTGAACCCCTATAGTGAGTCGTATTACCGGCCTCAATCGAA
	NlaIII_384-barcodes_366	GGCATTAAGCCNNNNNNNNGATCGTCGGACTGTAGAACTCTGAACCCCTATAGTGAGTCGTATTACCGGCCTCAATCGAA
	NlaIII_384-barcodes_367	TCATCCTAACTNNNNNNNNGATCGTCGGACTGTAGAACTCTGAACCCCTATAGTGAGTCGTATTACCGGCCTCAATCGAA
	NlaIII_384-barcodes_368	CGATAATCTTCNNNNNNNNGATCGTCGGACTGTAGAACTCTGAACCCCTATAGTGAGTCGTATTACCGGCCTCAATCGAA
	NlaIII_384-barcodes_369	TCAGCTTACTCNNNNNNNNGATCGTCGGACTGTAGAACTCTGAACCCCTATAGTGAGTCGTATTACCGGCCTCAATCGAA
	NlaIII_384-barcodes_370	CGCTACAGCCTNNNNNNNNGATCGTCGGACTGTAGAACTCTGAACCCCTATAGTGAGTCGTATTACCGGCCTCAATCGAA
	NlaIII_384-barcodes_371	GTAAGACATGTNNNNNNNNGATCGTCGGACTGTAGAACTCTGAACCCCTATAGTGAGTCGTATTACCGGCCTCAATCGAA
	NlaIII_384-barcodes_372	ACTATGGCCTCNNNNNNNNGATCGTCGGACTGTAGAACTCTGAACCCCTATAGTGAGTCGTATTACCGGCCTCAATCGAA
	NlaIII_384-barcodes_373	GTCGAGCCTTCNNNNNNNNGATCGTCGGACTGTAGAACTCTGAACCCCTATAGTGAGTCGTATTACCGGCCTCAATCGAA
	NlaIII_384-barcodes_374	ATCCGAGCCTCNNNNNNNNGATCGTCGGACTGTAGAACTCTGAACCCCTATAGTGAGTCGTATTACCGGCCTCAATCGAA
	NlaIII_384-barcodes_375	TCCGTCATACGNNNNNNNNGATCGTCGGACTGTAGAACTCTGAACCCCTATAGTGAGTCGTATTACCGGCCTCAATCGAA
	NlaIII_384-barcodes_376	GAGATCTGTGANNNNNNNNGATCGTCGGACTGTAGAACTCTGAACCCCTATAGTGAGTCGTATTACCGGCCTCAATCGAA
	NlaIII_384-barcodes_377	CCAGATCGGAANNNNNNNNGATCGTCGGACTGTAGAACTCTGAACCCCTATAGTGAGTCGTATTACCGGCCTCAATCGAA
	NlaIII_384-barcodes_378	TCTTGTGGAACNNNNNNNNGATCGTCGGACTGTAGAACTCTGAACCCCTATAGTGAGTCGTATTACCGGCCTCAATCGAA
	NlaIII_384-barcodes_379	GGACTATGGATNNNNNNNNGATCGTCGGACTGTAGAACTCTGAACCCCTATAGTGAGTCGTATTACCGGCCTCAATCGAA
	NlaIII_384-barcodes_380	ACCGTATACAANNNNNNNNGATCGTCGGACTGTAGAACTCTGAACCCCTATAGTGAGTCGTATTACCGGCCTCAATCGAA
	NlaIII_384-barcodes_381	ACAATCTAGAGNNNNNNNNGATCGTCGGACTGTAGAACTCTGAACCCCTATAGTGAGTCGTATTACCGGCCTCAATCGAA
	NlaIII_384-barcodes_382	GCTTGCCTTGGNNNNNNNNGATCGTCGGACTGTAGAACTCTGAACCCCTATAGTGAGTCGTATTACCGGCCTCAATCGAA
	NlaIII_384-barcodes_383	TCGCAACCAGCNNNNNNNNGATCGTCGGACTGTAGAACTCTGAACCCCTATAGTGAGTCGTATTACCGGCCTCAATCGAA
	NlaIII_384-barcodes_384	CAATACGGTTANNNNNNNNGATCGTCGGACTGTAGAACTCTGAACCCCTATAGTGAGTCGTATTACCGGCCTCAATCGAA

## Sheet: NlaIII_Rev_384-barcodes
Supplementary Table 3. List of oligonucleotides that can be used to prepare COVseq adapters.
	Adapter ID	Sequence (5'->3')
	NlaIII_384-barcodes_1	CGATTGAGGCCGGTAATACGACTCACTATAGGGGTTCAGAGTTCTACAGTCCGACGATCNNNNNNNNGAACTCTTCTGCATG
	NlaIII_384-barcodes_2	CGATTGAGGCCGGTAATACGACTCACTATAGGGGTTCAGAGTTCTACAGTCCGACGATCNNNNNNNNTCGAACATGATCATG
	NlaIII_384-barcodes_3	CGATTGAGGCCGGTAATACGACTCACTATAGGGGTTCAGAGTTCTACAGTCCGACGATCNNNNNNNNGGCATAGCTCGCATG
	NlaIII_384-barcodes_4	CGATTGAGGCCGGTAATACGACTCACTATAGGGGTTCAGAGTTCTACAGTCCGACGATCNNNNNNNNAACAGCCGCGACATG
	NlaIII_384-barcodes_5	CGATTGAGGCCGGTAATACGACTCACTATAGGGGTTCAGAGTTCTACAGTCCGACGATCNNNNNNNNCCTCTGTGTGTCATG
	NlaIII_384-barcodes_6	CGATTGAGGCCGGTAATACGACTCACTATAGGGGTTCAGAGTTCTACAGTCCGACGATCNNNNNNNNAGCCAACGGCACATG
	NlaIII_384-barcodes_7	CGATTGAGGCCGGTAATACGACTCACTATAGGGGTTCAGAGTTCTACAGTCCGACGATCNNNNNNNNATGACTTCGCGCATG
	NlaIII_384-barcodes_8	CGATTGAGGCCGGTAATACGACTCACTATAGGGGTTCAGAGTTCTACAGTCCGACGATCNNNNNNNNCTCGGTCGTCACATG
	NlaIII_384-barcodes_9	CGATTGAGGCCGGTAATACGACTCACTATAGGGGTTCAGAGTTCTACAGTCCGACGATCNNNNNNNNGGTAATTGTGGCATG
	NlaIII_384-barcodes_10	CGATTGAGGCCGGTAATACGACTCACTATAGGGGTTCAGAGTTCTACAGTCCGACGATCNNNNNNNNCCGGTCCAAGTCATG
	NlaIII_384-barcodes_11	CGATTGAGGCCGGTAATACGACTCACTATAGGGGTTCAGAGTTCTACAGTCCGACGATCNNNNNNNNTGATCTACGACCATG
	NlaIII_384-barcodes_12	CGATTGAGGCCGGTAATACGACTCACTATAGGGGTTCAGAGTTCTACAGTCCGACGATCNNNNNNNNCCTCACAGACCCATG
	NlaIII_384-barcodes_13	CGATTGAGGCCGGTAATACGACTCACTATAGGGGTTCAGAGTTCTACAGTCCGACGATCNNNNNNNNTAGCTAGATGCCATG
	NlaIII_384-barcodes_14	CGATTGAGGCCGGTAATACGACTCACTATAGGGGTTCAGAGTTCTACAGTCCGACGATCNNNNNNNNCAGAGTGTACGCATG
	NlaIII_384-barcodes_15	CGATTGAGGCCGGTAATACGACTCACTATAGGGGTTCAGAGTTCTACAGTCCGACGATCNNNNNNNNGATACTGTGCCCATG
	NlaIII_384-barcodes_16	CGATTGAGGCCGGTAATACGACTCACTATAGGGGTTCAGAGTTCTACAGTCCGACGATCNNNNNNNNGTTCACGTCTACATG
	NlaIII_384-barcodes_17	CGATTGAGGCCGGTAATACGACTCACTATAGGGGTTCAGAGTTCTACAGTCCGACGATCNNNNNNNNTTGACCATTGGCATG
	NlaIII_384-barcodes_18	CGATTGAGGCCGGTAATACGACTCACTATAGGGGTTCAGAGTTCTACAGTCCGACGATCNNNNNNNNCCGCATGACGACATG
	NlaIII_384-barcodes_19	CGATTGAGGCCGGTAATACGACTCACTATAGGGGTTCAGAGTTCTACAGTCCGACGATCNNNNNNNNACGCTTCACATCATG
	NlaIII_384-barcodes_20	CGATTGAGGCCGGTAATACGACTCACTATAGGGGTTCAGAGTTCTACAGTCCGACGATCNNNNNNNNCCTTCTCAGCCCATG
	NlaIII_384-barcodes_21	CGATTGAGGCCGGTAATACGACTCACTATAGGGGTTCAGAGTTCTACAGTCCGACGATCNNNNNNNNGTTCTCGGTACCATG
	NlaIII_384-barcodes_22	CGATTGAGGCCGGTAATACGACTCACTATAGGGGTTCAGAGTTCTACAGTCCGACGATCNNNNNNNNAACTGCTGAAGCATG
	NlaIII_384-barcodes_23	CGATTGAGGCCGGTAATACGACTCACTATAGGGGTTCAGAGTTCTACAGTCCGACGATCNNNNNNNNGGAGCACCAATCATG
	NlaIII_384-barcodes_24	CGATTGAGGCCGGTAATACGACTCACTATAGGGGTTCAGAGTTCTACAGTCCGACGATCNNNNNNNNACACGATCAAGCATG
	NlaIII_384-barcodes_25	CGATTGAGGCCGGTAATACGACTCACTATAGGGGTTCAGAGTTCTACAGTCCGACGATCNNNNNNNNTGCGCCTCATGCATG
	NlaIII_384-barcodes_26	CGATTGAGGCCGGTAATACGACTCACTATAGGGGTTCAGAGTTCTACAGTCCGACGATCNNNNNNNNCTGCCATAGCACATG
	NlaIII_384-barcodes_27	CGATTGAGGCCGGTAATACGACTCACTATAGGGGTTCAGAGTTCTACAGTCCGACGATCNNNNNNNNTCAGAATAGCTCATG
	NlaIII_384-barcodes_28	CGATTGAGGCCGGTAATACGACTCACTATAGGGGTTCAGAGTTCTACAGTCCGACGATCNNNNNNNNACGTGTTAATCCATG
	NlaIII_384-barcodes_29	CGATTGAGGCCGGTAATACGACTCACTATAGGGGTTCAGAGTTCTACAGTCCGACGATCNNNNNNNNGCTGGACTGAACATG
	NlaIII_384-barcodes_30	CGATTGAGGCCGGTAATACGACTCACTATAGGGGTTCAGAGTTCTACAGTCCGACGATCNNNNNNNNGTAGAGAGATTCATG
	NlaIII_384-barcodes_31	CGATTGAGGCCGGTAATACGACTCACTATAGGGGTTCAGAGTTCTACAGTCCGACGATCNNNNNNNNTACCGCATGTGCATG
	NlaIII_384-barcodes_32	CGATTGAGGCCGGTAATACGACTCACTATAGGGGTTCAGAGTTCTACAGTCCGACGATCNNNNNNNNTGATGGCCTCCCATG
	NlaIII_384-barcodes_33	CGATTGAGGCCGGTAATACGACTCACTATAGGGGTTCAGAGTTCTACAGTCCGACGATCNNNNNNNNTGCCTCACGCACATG
	NlaIII_384-barcodes_34	CGATTGAGGCCGGTAATACGACTCACTATAGGGGTTCAGAGTTCTACAGTCCGACGATCNNNNNNNNTATTCGCTTAGCATG
	NlaIII_384-barcodes_35	CGATTGAGGCCGGTAATACGACTCACTATAGGGGTTCAGAGTTCTACAGTCCGACGATCNNNNNNNNCGTCGACATTGCATG
	NlaIII_384-barcodes_36	CGATTGAGGCCGGTAATACGACTCACTATAGGGGTTCAGAGTTCTACAGTCCGACGATCNNNNNNNNATGTAACGAGACATG
	NlaIII_384-barcodes_37	CGATTGAGGCCGGTAATACGACTCACTATAGGGGTTCAGAGTTCTACAGTCCGACGATCNNNNNNNNCGGTCTATATTCATG
	NlaIII_384-barcodes_38	CGATTGAGGCCGGTAATACGACTCACTATAGGGGTTCAGAGTTCTACAGTCCGACGATCNNNNNNNNAGCATGATAGGCATG
	NlaIII_384-barcodes_39	CGATTGAGGCCGGTAATACGACTCACTATAGGGGTTCAGAGTTCTACAGTCCGACGATCNNNNNNNNGAGTTGTCGTGCATG
	NlaIII_384-barcodes_40	CGATTGAGGCCGGTAATACGACTCACTATAGGGGTTCAGAGTTCTACAGTCCGACGATCNNNNNNNNTCATCTGCAGGCATG
	NlaIII_384-barcodes_41	CGATTGAGGCCGGTAATACGACTCACTATAGGGGTTCAGAGTTCTACAGTCCGACGATCNNNNNNNNCATGCAGCTCTCATG
	NlaIII_384-barcodes_42	CGATTGAGGCCGGTAATACGACTCACTATAGGGGTTCAGAGTTCTACAGTCCGACGATCNNNNNNNNTGAGAAGGTCACATG
	NlaIII_384-barcodes_43	CGATTGAGGCCGGTAATACGACTCACTATAGGGGTTCAGAGTTCTACAGTCCGACGATCNNNNNNNNGTTAGCCATTCCATG
	NlaIII_384-barcodes_44	CGATTGAGGCCGGTAATACGACTCACTATAGGGGTTCAGAGTTCTACAGTCCGACGATCNNNNNNNNGTCGACAAGGTCATG
	NlaIII_384-barcodes_45	CGATTGAGGCCGGTAATACGACTCACTATAGGGGTTCAGAGTTCTACAGTCCGACGATCNNNNNNNNGACGGCATCAACATG
	NlaIII_384-barcodes_46	CGATTGAGGCCGGTAATACGACTCACTATAGGGGTTCAGAGTTCTACAGTCCGACGATCNNNNNNNNTACCAGTCAAGCATG
	NlaIII_384-barcodes_47	CGATTGAGGCCGGTAATACGACTCACTATAGGGGTTCAGAGTTCTACAGTCCGACGATCNNNNNNNNTCGCACTGAGTCATG
	NlaIII_384-barcodes_48	CGATTGAGGCCGGTAATACGACTCACTATAGGGGTTCAGAGTTCTACAGTCCGACGATCNNNNNNNNATCCGGCCTTACATG
	NlaIII_384-barcodes_49	CGATTGAGGCCGGTAATACGACTCACTATAGGGGTTCAGAGTTCTACAGTCCGACGATCNNNNNNNNAAGCGGATTCGCATG
	NlaIII_384-barcodes_50	CGATTGAGGCCGGTAATACGACTCACTATAGGGGTTCAGAGTTCTACAGTCCGACGATCNNNNNNNNCCTGATCCGATCATG
	NlaIII_384-barcodes_51	CGATTGAGGCCGGTAATACGACTCACTATAGGGGTTCAGAGTTCTACAGTCCGACGATCNNNNNNNNGCTACGTGGACCATG
	NlaIII_384-barcodes_52	CGATTGAGGCCGGTAATACGACTCACTATAGGGGTTCAGAGTTCTACAGTCCGACGATCNNNNNNNNCCATTATGGTACATG
	NlaIII_384-barcodes_53	CGATTGAGGCCGGTAATACGACTCACTATAGGGGTTCAGAGTTCTACAGTCCGACGATCNNNNNNNNGAGAACACATACATG
	NlaIII_384-barcodes_54	CGATTGAGGCCGGTAATACGACTCACTATAGGGGTTCAGAGTTCTACAGTCCGACGATCNNNNNNNNCCACACAACATCATG
	NlaIII_384-barcodes_55	CGATTGAGGCCGGTAATACGACTCACTATAGGGGTTCAGAGTTCTACAGTCCGACGATCNNNNNNNNCTTAGGCTCCTCATG
	NlaIII_384-barcodes_56	CGATTGAGGCCGGTAATACGACTCACTATAGGGGTTCAGAGTTCTACAGTCCGACGATCNNNNNNNNTCTCGTGTCGCCATG
	NlaIII_384-barcodes_57	CGATTGAGGCCGGTAATACGACTCACTATAGGGGTTCAGAGTTCTACAGTCCGACGATCNNNNNNNNTTCTGTAGTAGCATG
	NlaIII_384-barcodes_58	CGATTGAGGCCGGTAATACGACTCACTATAGGGGTTCAGAGTTCTACAGTCCGACGATCNNNNNNNNAGTCACCTCGGCATG
	NlaIII_384-barcodes_59	CGATTGAGGCCGGTAATACGACTCACTATAGGGGTTCAGAGTTCTACAGTCCGACGATCNNNNNNNNAGTCGTCCTCTCATG
	NlaIII_384-barcodes_60	CGATTGAGGCCGGTAATACGACTCACTATAGGGGTTCAGAGTTCTACAGTCCGACGATCNNNNNNNNTTCACGCCTCTCATG
	NlaIII_384-barcodes_61	CGATTGAGGCCGGTAATACGACTCACTATAGGGGTTCAGAGTTCTACAGTCCGACGATCNNNNNNNNGGCTACACACTCATG
	NlaIII_384-barcodes_62	CGATTGAGGCCGGTAATACGACTCACTATAGGGGTTCAGAGTTCTACAGTCCGACGATCNNNNNNNNGGTACTTCCTTCATG
	NlaIII_384-barcodes_63	CGATTGAGGCCGGTAATACGACTCACTATAGGGGTTCAGAGTTCTACAGTCCGACGATCNNNNNNNNACAATCTGCGCCATG
	NlaIII_384-barcodes_64	CGATTGAGGCCGGTAATACGACTCACTATAGGGGTTCAGAGTTCTACAGTCCGACGATCNNNNNNNNTGGTAGATTACCATG
	NlaIII_384-barcodes_65	CGATTGAGGCCGGTAATACGACTCACTATAGGGGTTCAGAGTTCTACAGTCCGACGATCNNNNNNNNGCAGTCGCCTTCATG
	NlaIII_384-barcodes_66	CGATTGAGGCCGGTAATACGACTCACTATAGGGGTTCAGAGTTCTACAGTCCGACGATCNNNNNNNNGCAGCTTAAGCCATG
	NlaIII_384-barcodes_67	CGATTGAGGCCGGTAATACGACTCACTATAGGGGTTCAGAGTTCTACAGTCCGACGATCNNNNNNNNTCATGAATCAGCATG
	NlaIII_384-barcodes_68	CGATTGAGGCCGGTAATACGACTCACTATAGGGGTTCAGAGTTCTACAGTCCGACGATCNNNNNNNNTCGAATTGTCACATG
	NlaIII_384-barcodes_69	CGATTGAGGCCGGTAATACGACTCACTATAGGGGTTCAGAGTTCTACAGTCCGACGATCNNNNNNNNACTGCTGCTGCCATG
	NlaIII_384-barcodes_70	CGATTGAGGCCGGTAATACGACTCACTATAGGGGTTCAGAGTTCTACAGTCCGACGATCNNNNNNNNGAGTGACATATCATG
	NlaIII_384-barcodes_71	CGATTGAGGCCGGTAATACGACTCACTATAGGGGTTCAGAGTTCTACAGTCCGACGATCNNNNNNNNAATACCGACCGCATG
	NlaIII_384-barcodes_72	CGATTGAGGCCGGTAATACGACTCACTATAGGGGTTCAGAGTTCTACAGTCCGACGATCNNNNNNNNCGCTGCCTACACATG
	NlaIII_384-barcodes_73	CGATTGAGGCCGGTAATACGACTCACTATAGGGGTTCAGAGTTCTACAGTCCGACGATCNNNNNNNNCATTCGACGTTCATG
	NlaIII_384-barcodes_74	CGATTGAGGCCGGTAATACGACTCACTATAGGGGTTCAGAGTTCTACAGTCCGACGATCNNNNNNNNATGGACCTGTACATG
	NlaIII_384-barcodes_75	CGATTGAGGCCGGTAATACGACTCACTATAGGGGTTCAGAGTTCTACAGTCCGACGATCNNNNNNNNTACTAGCACGACATG
	NlaIII_384-barcodes_76	CGATTGAGGCCGGTAATACGACTCACTATAGGGGTTCAGAGTTCTACAGTCCGACGATCNNNNNNNNTCAATCCGATTCATG
	NlaIII_384-barcodes_77	CGATTGAGGCCGGTAATACGACTCACTATAGGGGTTCAGAGTTCTACAGTCCGACGATCNNNNNNNNCCGGCGTCATACATG
	NlaIII_384-barcodes_78	CGATTGAGGCCGGTAATACGACTCACTATAGGGGTTCAGAGTTCTACAGTCCGACGATCNNNNNNNNACGATTGCACCCATG
	NlaIII_384-barcodes_79	CGATTGAGGCCGGTAATACGACTCACTATAGGGGTTCAGAGTTCTACAGTCCGACGATCNNNNNNNNACTGTGAATCCCATG
	NlaIII_384-barcodes_80	CGATTGAGGCCGGTAATACGACTCACTATAGGGGTTCAGAGTTCTACAGTCCGACGATCNNNNNNNNTTGTACAGATCCATG
	NlaIII_384-barcodes_81	CGATTGAGGCCGGTAATACGACTCACTATAGGGGTTCAGAGTTCTACAGTCCGACGATCNNNNNNNNTACTGAGTATCCATG
	NlaIII_384-barcodes_82	CGATTGAGGCCGGTAATACGACTCACTATAGGGGTTCAGAGTTCTACAGTCCGACGATCNNNNNNNNGTGTTCTTGCACATG
	NlaIII_384-barcodes_83	CGATTGAGGCCGGTAATACGACTCACTATAGGGGTTCAGAGTTCTACAGTCCGACGATCNNNNNNNNGAAGCGGAGAGCATG
	NlaIII_384-barcodes_84	CGATTGAGGCCGGTAATACGACTCACTATAGGGGTTCAGAGTTCTACAGTCCGACGATCNNNNNNNNGGTAGGCGAGTCATG
	NlaIII_384-barcodes_85	CGATTGAGGCCGGTAATACGACTCACTATAGGGGTTCAGAGTTCTACAGTCCGACGATCNNNNNNNNGAGAGAATCTCCATG
	NlaIII_384-barcodes_86	CGATTGAGGCCGGTAATACGACTCACTATAGGGGTTCAGAGTTCTACAGTCCGACGATCNNNNNNNNAGCACTAAGATCATG
	NlaIII_384-barcodes_87	CGATTGAGGCCGGTAATACGACTCACTATAGGGGTTCAGAGTTCTACAGTCCGACGATCNNNNNNNNAGCTATCCGGCCATG
	NlaIII_384-barcodes_88	CGATTGAGGCCGGTAATACGACTCACTATAGGGGTTCAGAGTTCTACAGTCCGACGATCNNNNNNNNTCCTTCTAGCGCATG
	NlaIII_384-barcodes_89	CGATTGAGGCCGGTAATACGACTCACTATAGGGGTTCAGAGTTCTACAGTCCGACGATCNNNNNNNNGTGGCCTACACCATG
	NlaIII_384-barcodes_90	CGATTGAGGCCGGTAATACGACTCACTATAGGGGTTCAGAGTTCTACAGTCCGACGATCNNNNNNNNACCGGAACCTCCATG
	NlaIII_384-barcodes_91	CGATTGAGGCCGGTAATACGACTCACTATAGGGGTTCAGAGTTCTACAGTCCGACGATCNNNNNNNNAACGACAGTGGCATG
	NlaIII_384-barcodes_92	CGATTGAGGCCGGTAATACGACTCACTATAGGGGTTCAGAGTTCTACAGTCCGACGATCNNNNNNNNCGTCCTGAGGTCATG
	NlaIII_384-barcodes_93	CGATTGAGGCCGGTAATACGACTCACTATAGGGGTTCAGAGTTCTACAGTCCGACGATCNNNNNNNNTCTCTGACAATCATG
	NlaIII_384-barcodes_94	CGATTGAGGCCGGTAATACGACTCACTATAGGGGTTCAGAGTTCTACAGTCCGACGATCNNNNNNNNATCAATGTTGGCATG
	NlaIII_384-barcodes_95	CGATTGAGGCCGGTAATACGACTCACTATAGGGGTTCAGAGTTCTACAGTCCGACGATCNNNNNNNNGTGACTAGCCTCATG
	NlaIII_384-barcodes_96	CGATTGAGGCCGGTAATACGACTCACTATAGGGGTTCAGAGTTCTACAGTCCGACGATCNNNNNNNNCGGTTAAGGATCATG
	NlaIII_384-barcodes_97	CGATTGAGGCCGGTAATACGACTCACTATAGGGGTTCAGAGTTCTACAGTCCGACGATCNNNNNNNNACTAATCGACGCATG
	NlaIII_384-barcodes_98	CGATTGAGGCCGGTAATACGACTCACTATAGGGGTTCAGAGTTCTACAGTCCGACGATCNNNNNNNNAGAGCATTACCCATG
	NlaIII_384-barcodes_99	CGATTGAGGCCGGTAATACGACTCACTATAGGGGTTCAGAGTTCTACAGTCCGACGATCNNNNNNNNGACGCGTTAACCATG
	NlaIII_384-barcodes_100	CGATTGAGGCCGGTAATACGACTCACTATAGGGGTTCAGAGTTCTACAGTCCGACGATCNNNNNNNNAGAGCTGGCGACATG
	NlaIII_384-barcodes_101	CGATTGAGGCCGGTAATACGACTCACTATAGGGGTTCAGAGTTCTACAGTCCGACGATCNNNNNNNNAATGAGGTGGCCATG
	NlaIII_384-barcodes_102	CGATTGAGGCCGGTAATACGACTCACTATAGGGGTTCAGAGTTCTACAGTCCGACGATCNNNNNNNNGACACCAATCTCATG
	NlaIII_384-barcodes_103	CGATTGAGGCCGGTAATACGACTCACTATAGGGGTTCAGAGTTCTACAGTCCGACGATCNNNNNNNNCTCTAATACCTCATG
	NlaIII_384-barcodes_104	CGATTGAGGCCGGTAATACGACTCACTATAGGGGTTCAGAGTTCTACAGTCCGACGATCNNNNNNNNCCGACGCAGAACATG
	NlaIII_384-barcodes_105	CGATTGAGGCCGGTAATACGACTCACTATAGGGGTTCAGAGTTCTACAGTCCGACGATCNNNNNNNNATAGTTAGAGGCATG
	NlaIII_384-barcodes_106	CGATTGAGGCCGGTAATACGACTCACTATAGGGGTTCAGAGTTCTACAGTCCGACGATCNNNNNNNNCACGTGCTACGCATG
	NlaIII_384-barcodes_107	CGATTGAGGCCGGTAATACGACTCACTATAGGGGTTCAGAGTTCTACAGTCCGACGATCNNNNNNNNGCTTGGCACCACATG
	NlaIII_384-barcodes_108	CGATTGAGGCCGGTAATACGACTCACTATAGGGGTTCAGAGTTCTACAGTCCGACGATCNNNNNNNNCTACGTACAGACATG
	NlaIII_384-barcodes_109	CGATTGAGGCCGGTAATACGACTCACTATAGGGGTTCAGAGTTCTACAGTCCGACGATCNNNNNNNNACTGCACAACTCATG
	NlaIII_384-barcodes_110	CGATTGAGGCCGGTAATACGACTCACTATAGGGGTTCAGAGTTCTACAGTCCGACGATCNNNNNNNNATAATGCCGAGCATG
	NlaIII_384-barcodes_111	CGATTGAGGCCGGTAATACGACTCACTATAGGGGTTCAGAGTTCTACAGTCCGACGATCNNNNNNNNCCGAACCTATGCATG
	NlaIII_384-barcodes_112	CGATTGAGGCCGGTAATACGACTCACTATAGGGGTTCAGAGTTCTACAGTCCGACGATCNNNNNNNNTTACCAATGGTCATG
	NlaIII_384-barcodes_113	CGATTGAGGCCGGTAATACGACTCACTATAGGGGTTCAGAGTTCTACAGTCCGACGATCNNNNNNNNCTATTACAACCCATG
	NlaIII_384-barcodes_114	CGATTGAGGCCGGTAATACGACTCACTATAGGGGTTCAGAGTTCTACAGTCCGACGATCNNNNNNNNTAGCGCCAGCACATG
	NlaIII_384-barcodes_115	CGATTGAGGCCGGTAATACGACTCACTATAGGGGTTCAGAGTTCTACAGTCCGACGATCNNNNNNNNGGTAGCACCACCATG
	NlaIII_384-barcodes_116	CGATTGAGGCCGGTAATACGACTCACTATAGGGGTTCAGAGTTCTACAGTCCGACGATCNNNNNNNNACACATAGGTTCATG
	NlaIII_384-barcodes_117	CGATTGAGGCCGGTAATACGACTCACTATAGGGGTTCAGAGTTCTACAGTCCGACGATCNNNNNNNNTTGGACTCTCGCATG
	NlaIII_384-barcodes_118	CGATTGAGGCCGGTAATACGACTCACTATAGGGGTTCAGAGTTCTACAGTCCGACGATCNNNNNNNNTCAACCGATGACATG
	NlaIII_384-barcodes_119	CGATTGAGGCCGGTAATACGACTCACTATAGGGGTTCAGAGTTCTACAGTCCGACGATCNNNNNNNNGCTGGTAATTGCATG
	NlaIII_384-barcodes_120	CGATTGAGGCCGGTAATACGACTCACTATAGGGGTTCAGAGTTCTACAGTCCGACGATCNNNNNNNNGTGGTTGTCTCCATG
	NlaIII_384-barcodes_121	CGATTGAGGCCGGTAATACGACTCACTATAGGGGTTCAGAGTTCTACAGTCCGACGATCNNNNNNNNGCCATAGAATCCATG
	NlaIII_384-barcodes_122	CGATTGAGGCCGGTAATACGACTCACTATAGGGGTTCAGAGTTCTACAGTCCGACGATCNNNNNNNNTGCGTCAGAATCATG
	NlaIII_384-barcodes_123	CGATTGAGGCCGGTAATACGACTCACTATAGGGGTTCAGAGTTCTACAGTCCGACGATCNNNNNNNNTGCTCCGACAGCATG
	NlaIII_384-barcodes_124	CGATTGAGGCCGGTAATACGACTCACTATAGGGGTTCAGAGTTCTACAGTCCGACGATCNNNNNNNNTACAGTACAGTCATG
	NlaIII_384-barcodes_125	CGATTGAGGCCGGTAATACGACTCACTATAGGGGTTCAGAGTTCTACAGTCCGACGATCNNNNNNNNTACATCACCAGCATG
	NlaIII_384-barcodes_126	CGATTGAGGCCGGTAATACGACTCACTATAGGGGTTCAGAGTTCTACAGTCCGACGATCNNNNNNNNAGTGCATGTGTCATG
	NlaIII_384-barcodes_127	CGATTGAGGCCGGTAATACGACTCACTATAGGGGTTCAGAGTTCTACAGTCCGACGATCNNNNNNNNATCTGACAGAGCATG
	NlaIII_384-barcodes_128	CGATTGAGGCCGGTAATACGACTCACTATAGGGGTTCAGAGTTCTACAGTCCGACGATCNNNNNNNNATCGGTTCTACCATG
	NlaIII_384-barcodes_129	CGATTGAGGCCGGTAATACGACTCACTATAGGGGTTCAGAGTTCTACAGTCCGACGATCNNNNNNNNGTCAGGATTCCCATG
	NlaIII_384-barcodes_130	CGATTGAGGCCGGTAATACGACTCACTATAGGGGTTCAGAGTTCTACAGTCCGACGATCNNNNNNNNCAACAGGTGATCATG
	NlaIII_384-barcodes_131	CGATTGAGGCCGGTAATACGACTCACTATAGGGGTTCAGAGTTCTACAGTCCGACGATCNNNNNNNNACGAGGTACAGCATG
	NlaIII_384-barcodes_132	CGATTGAGGCCGGTAATACGACTCACTATAGGGGTTCAGAGTTCTACAGTCCGACGATCNNNNNNNNGGCAGCTCGTACATG
	NlaIII_384-barcodes_133	CGATTGAGGCCGGTAATACGACTCACTATAGGGGTTCAGAGTTCTACAGTCCGACGATCNNNNNNNNAAGGTACCTGGCATG
	NlaIII_384-barcodes_134	CGATTGAGGCCGGTAATACGACTCACTATAGGGGTTCAGAGTTCTACAGTCCGACGATCNNNNNNNNACGCAGAATTACATG
	NlaIII_384-barcodes_135	CGATTGAGGCCGGTAATACGACTCACTATAGGGGTTCAGAGTTCTACAGTCCGACGATCNNNNNNNNGCCTATGCTACCATG
	NlaIII_384-barcodes_136	CGATTGAGGCCGGTAATACGACTCACTATAGGGGTTCAGAGTTCTACAGTCCGACGATCNNNNNNNNAATGTAAGGCGCATG
	NlaIII_384-barcodes_137	CGATTGAGGCCGGTAATACGACTCACTATAGGGGTTCAGAGTTCTACAGTCCGACGATCNNNNNNNNCGGTATCGAACCATG
	NlaIII_384-barcodes_138	CGATTGAGGCCGGTAATACGACTCACTATAGGGGTTCAGAGTTCTACAGTCCGACGATCNNNNNNNNGCCGAAGGAGACATG
	NlaIII_384-barcodes_139	CGATTGAGGCCGGTAATACGACTCACTATAGGGGTTCAGAGTTCTACAGTCCGACGATCNNNNNNNNTTCGCCGGTGTCATG
	NlaIII_384-barcodes_140	CGATTGAGGCCGGTAATACGACTCACTATAGGGGTTCAGAGTTCTACAGTCCGACGATCNNNNNNNNGGAATGCTGTTCATG
	NlaIII_384-barcodes_141	CGATTGAGGCCGGTAATACGACTCACTATAGGGGTTCAGAGTTCTACAGTCCGACGATCNNNNNNNNAAGTCTAGGTGCATG
	NlaIII_384-barcodes_142	CGATTGAGGCCGGTAATACGACTCACTATAGGGGTTCAGAGTTCTACAGTCCGACGATCNNNNNNNNGTGTGGATATGCATG
	NlaIII_384-barcodes_143	CGATTGAGGCCGGTAATACGACTCACTATAGGGGTTCAGAGTTCTACAGTCCGACGATCNNNNNNNNGTAATCCACCACATG
	NlaIII_384-barcodes_144	CGATTGAGGCCGGTAATACGACTCACTATAGGGGTTCAGAGTTCTACAGTCCGACGATCNNNNNNNNATCGTGAGCCACATG
	NlaIII_384-barcodes_145	CGATTGAGGCCGGTAATACGACTCACTATAGGGGTTCAGAGTTCTACAGTCCGACGATCNNNNNNNNGCGTACCTTCTCATG
	NlaIII_384-barcodes_146	CGATTGAGGCCGGTAATACGACTCACTATAGGGGTTCAGAGTTCTACAGTCCGACGATCNNNNNNNNCTTGGCGCATTCATG
	NlaIII_384-barcodes_147	CGATTGAGGCCGGTAATACGACTCACTATAGGGGTTCAGAGTTCTACAGTCCGACGATCNNNNNNNNCTCATCGATAACATG
	NlaIII_384-barcodes_148	CGATTGAGGCCGGTAATACGACTCACTATAGGGGTTCAGAGTTCTACAGTCCGACGATCNNNNNNNNTTCCGTGTGATCATG
	NlaIII_384-barcodes_149	CGATTGAGGCCGGTAATACGACTCACTATAGGGGTTCAGAGTTCTACAGTCCGACGATCNNNNNNNNGTACTACCTTGCATG
	NlaIII_384-barcodes_150	CGATTGAGGCCGGTAATACGACTCACTATAGGGGTTCAGAGTTCTACAGTCCGACGATCNNNNNNNNCGTCGCAGTATCATG
	NlaIII_384-barcodes_151	CGATTGAGGCCGGTAATACGACTCACTATAGGGGTTCAGAGTTCTACAGTCCGACGATCNNNNNNNNACCATACTGACCATG
	NlaIII_384-barcodes_152	CGATTGAGGCCGGTAATACGACTCACTATAGGGGTTCAGAGTTCTACAGTCCGACGATCNNNNNNNNCCTGTCGAGTGCATG
	NlaIII_384-barcodes_153	CGATTGAGGCCGGTAATACGACTCACTATAGGGGTTCAGAGTTCTACAGTCCGACGATCNNNNNNNNTTCTGGCGAGCCATG
	NlaIII_384-barcodes_154	CGATTGAGGCCGGTAATACGACTCACTATAGGGGTTCAGAGTTCTACAGTCCGACGATCNNNNNNNNCGTGGTGACTACATG
	NlaIII_384-barcodes_155	CGATTGAGGCCGGTAATACGACTCACTATAGGGGTTCAGAGTTCTACAGTCCGACGATCNNNNNNNNTATGGCTACTGCATG
	NlaIII_384-barcodes_156	CGATTGAGGCCGGTAATACGACTCACTATAGGGGTTCAGAGTTCTACAGTCCGACGATCNNNNNNNNCGTACCTCTCGCATG
	NlaIII_384-barcodes_157	CGATTGAGGCCGGTAATACGACTCACTATAGGGGTTCAGAGTTCTACAGTCCGACGATCNNNNNNNNAATGCGCGCACCATG
	NlaIII_384-barcodes_158	CGATTGAGGCCGGTAATACGACTCACTATAGGGGTTCAGAGTTCTACAGTCCGACGATCNNNNNNNNTGCTCTTAAGACATG
	NlaIII_384-barcodes_159	CGATTGAGGCCGGTAATACGACTCACTATAGGGGTTCAGAGTTCTACAGTCCGACGATCNNNNNNNNGAGCAATGCCACATG
	NlaIII_384-barcodes_160	CGATTGAGGCCGGTAATACGACTCACTATAGGGGTTCAGAGTTCTACAGTCCGACGATCNNNNNNNNTGCTTCCGGTCCATG
	NlaIII_384-barcodes_161	CGATTGAGGCCGGTAATACGACTCACTATAGGGGTTCAGAGTTCTACAGTCCGACGATCNNNNNNNNTGTGCATACCACATG
	NlaIII_384-barcodes_162	CGATTGAGGCCGGTAATACGACTCACTATAGGGGTTCAGAGTTCTACAGTCCGACGATCNNNNNNNNACACCAAGAGCCATG
	NlaIII_384-barcodes_163	CGATTGAGGCCGGTAATACGACTCACTATAGGGGTTCAGAGTTCTACAGTCCGACGATCNNNNNNNNTACACTCGACACATG
	NlaIII_384-barcodes_164	CGATTGAGGCCGGTAATACGACTCACTATAGGGGTTCAGAGTTCTACAGTCCGACGATCNNNNNNNNCTAGAAGCCATCATG
	NlaIII_384-barcodes_165	CGATTGAGGCCGGTAATACGACTCACTATAGGGGTTCAGAGTTCTACAGTCCGACGATCNNNNNNNNTGGATCCACGGCATG
	NlaIII_384-barcodes_166	CGATTGAGGCCGGTAATACGACTCACTATAGGGGTTCAGAGTTCTACAGTCCGACGATCNNNNNNNNAGTAAGGCGCGCATG
	NlaIII_384-barcodes_167	CGATTGAGGCCGGTAATACGACTCACTATAGGGGTTCAGAGTTCTACAGTCCGACGATCNNNNNNNNAGTCTAACTTCCATG
	NlaIII_384-barcodes_168	CGATTGAGGCCGGTAATACGACTCACTATAGGGGTTCAGAGTTCTACAGTCCGACGATCNNNNNNNNCATATGTCATCCATG
	NlaIII_384-barcodes_169	CGATTGAGGCCGGTAATACGACTCACTATAGGGGTTCAGAGTTCTACAGTCCGACGATCNNNNNNNNTGGCCAGCTAACATG
	NlaIII_384-barcodes_170	CGATTGAGGCCGGTAATACGACTCACTATAGGGGTTCAGAGTTCTACAGTCCGACGATCNNNNNNNNTAGTCGGCACCCATG
	NlaIII_384-barcodes_171	CGATTGAGGCCGGTAATACGACTCACTATAGGGGTTCAGAGTTCTACAGTCCGACGATCNNNNNNNNTGTCTTGGTTACATG
	NlaIII_384-barcodes_172	CGATTGAGGCCGGTAATACGACTCACTATAGGGGTTCAGAGTTCTACAGTCCGACGATCNNNNNNNNAATTAAGCCTGCATG
	NlaIII_384-barcodes_173	CGATTGAGGCCGGTAATACGACTCACTATAGGGGTTCAGAGTTCTACAGTCCGACGATCNNNNNNNNCCTTGTCTCTGCATG
	NlaIII_384-barcodes_174	CGATTGAGGCCGGTAATACGACTCACTATAGGGGTTCAGAGTTCTACAGTCCGACGATCNNNNNNNNAATCGCTCCGCCATG
	NlaIII_384-barcodes_175	CGATTGAGGCCGGTAATACGACTCACTATAGGGGTTCAGAGTTCTACAGTCCGACGATCNNNNNNNNATCATCGCGCTCATG
	NlaIII_384-barcodes_176	CGATTGAGGCCGGTAATACGACTCACTATAGGGGTTCAGAGTTCTACAGTCCGACGATCNNNNNNNNGCTACACACAGCATG
	NlaIII_384-barcodes_177	CGATTGAGGCCGGTAATACGACTCACTATAGGGGTTCAGAGTTCTACAGTCCGACGATCNNNNNNNNTCTCCAAGCTTCATG
	NlaIII_384-barcodes_178	CGATTGAGGCCGGTAATACGACTCACTATAGGGGTTCAGAGTTCTACAGTCCGACGATCNNNNNNNNCAATTCACGCCCATG
	NlaIII_384-barcodes_179	CGATTGAGGCCGGTAATACGACTCACTATAGGGGTTCAGAGTTCTACAGTCCGACGATCNNNNNNNNGCTAGCGTGTTCATG
	NlaIII_384-barcodes_180	CGATTGAGGCCGGTAATACGACTCACTATAGGGGTTCAGAGTTCTACAGTCCGACGATCNNNNNNNNGCCATTACGAACATG
	NlaIII_384-barcodes_181	CGATTGAGGCCGGTAATACGACTCACTATAGGGGTTCAGAGTTCTACAGTCCGACGATCNNNNNNNNAGCTTGCTCATCATG
	NlaIII_384-barcodes_182	CGATTGAGGCCGGTAATACGACTCACTATAGGGGTTCAGAGTTCTACAGTCCGACGATCNNNNNNNNGTGGTGCAGGACATG
	NlaIII_384-barcodes_183	CGATTGAGGCCGGTAATACGACTCACTATAGGGGTTCAGAGTTCTACAGTCCGACGATCNNNNNNNNCGTGAGTAAGGCATG
	NlaIII_384-barcodes_184	CGATTGAGGCCGGTAATACGACTCACTATAGGGGTTCAGAGTTCTACAGTCCGACGATCNNNNNNNNCACCACGACTCCATG
	NlaIII_384-barcodes_185	CGATTGAGGCCGGTAATACGACTCACTATAGGGGTTCAGAGTTCTACAGTCCGACGATCNNNNNNNNATTCCGTAGGCCATG
	NlaIII_384-barcodes_186	CGATTGAGGCCGGTAATACGACTCACTATAGGGGTTCAGAGTTCTACAGTCCGACGATCNNNNNNNNTTACTTCTCGGCATG
	NlaIII_384-barcodes_187	CGATTGAGGCCGGTAATACGACTCACTATAGGGGTTCAGAGTTCTACAGTCCGACGATCNNNNNNNNAAGCTCGCCAACATG
	NlaIII_384-barcodes_188	CGATTGAGGCCGGTAATACGACTCACTATAGGGGTTCAGAGTTCTACAGTCCGACGATCNNNNNNNNGGCCGATACAGCATG
	NlaIII_384-barcodes_189	CGATTGAGGCCGGTAATACGACTCACTATAGGGGTTCAGAGTTCTACAGTCCGACGATCNNNNNNNNTTACATTCGCACATG
	NlaIII_384-barcodes_190	CGATTGAGGCCGGTAATACGACTCACTATAGGGGTTCAGAGTTCTACAGTCCGACGATCNNNNNNNNCGAACTAGTCACATG
	NlaIII_384-barcodes_191	CGATTGAGGCCGGTAATACGACTCACTATAGGGGTTCAGAGTTCTACAGTCCGACGATCNNNNNNNNGCACTCTAGGTCATG
	NlaIII_384-barcodes_192	CGATTGAGGCCGGTAATACGACTCACTATAGGGGTTCAGAGTTCTACAGTCCGACGATCNNNNNNNNACCTTCGGATACATG
	NlaIII_384-barcodes_193	CGATTGAGGCCGGTAATACGACTCACTATAGGGGTTCAGAGTTCTACAGTCCGACGATCNNNNNNNNTGTCCGCTACTCATG
	NlaIII_384-barcodes_194	CGATTGAGGCCGGTAATACGACTCACTATAGGGGTTCAGAGTTCTACAGTCCGACGATCNNNNNNNNTCGGTGGATAGCATG
	NlaIII_384-barcodes_195	CGATTGAGGCCGGTAATACGACTCACTATAGGGGTTCAGAGTTCTACAGTCCGACGATCNNNNNNNNTTAGGAGCGTGCATG
	NlaIII_384-barcodes_196	CGATTGAGGCCGGTAATACGACTCACTATAGGGGTTCAGAGTTCTACAGTCCGACGATCNNNNNNNNGTATGCGCTTACATG
	NlaIII_384-barcodes_197	CGATTGAGGCCGGTAATACGACTCACTATAGGGGTTCAGAGTTCTACAGTCCGACGATCNNNNNNNNGTATTGTGAACCATG
	NlaIII_384-barcodes_198	CGATTGAGGCCGGTAATACGACTCACTATAGGGGTTCAGAGTTCTACAGTCCGACGATCNNNNNNNNGTATCACTCTACATG
	NlaIII_384-barcodes_199	CGATTGAGGCCGGTAATACGACTCACTATAGGGGTTCAGAGTTCTACAGTCCGACGATCNNNNNNNNGAAGAGTCCGTCATG
	NlaIII_384-barcodes_200	CGATTGAGGCCGGTAATACGACTCACTATAGGGGTTCAGAGTTCTACAGTCCGACGATCNNNNNNNNATCTTCAACTCCATG
	NlaIII_384-barcodes_201	CGATTGAGGCCGGTAATACGACTCACTATAGGGGTTCAGAGTTCTACAGTCCGACGATCNNNNNNNNACCACGACTTGCATG
	NlaIII_384-barcodes_202	CGATTGAGGCCGGTAATACGACTCACTATAGGGGTTCAGAGTTCTACAGTCCGACGATCNNNNNNNNCTCTATAGCTACATG
	NlaIII_384-barcodes_203	CGATTGAGGCCGGTAATACGACTCACTATAGGGGTTCAGAGTTCTACAGTCCGACGATCNNNNNNNNCTGTAAGAGACCATG
	NlaIII_384-barcodes_204	CGATTGAGGCCGGTAATACGACTCACTATAGGGGTTCAGAGTTCTACAGTCCGACGATCNNNNNNNNGAACGAAGCGGCATG
	NlaIII_384-barcodes_205	CGATTGAGGCCGGTAATACGACTCACTATAGGGGTTCAGAGTTCTACAGTCCGACGATCNNNNNNNNACGAGTCTGGACATG
	NlaIII_384-barcodes_206	CGATTGAGGCCGGTAATACGACTCACTATAGGGGTTCAGAGTTCTACAGTCCGACGATCNNNNNNNNGATTGTCCAGACATG
	NlaIII_384-barcodes_207	CGATTGAGGCCGGTAATACGACTCACTATAGGGGTTCAGAGTTCTACAGTCCGACGATCNNNNNNNNCCACTCGTAGCCATG
	NlaIII_384-barcodes_208	CGATTGAGGCCGGTAATACGACTCACTATAGGGGTTCAGAGTTCTACAGTCCGACGATCNNNNNNNNTAAGACGCATCCATG
	NlaIII_384-barcodes_209	CGATTGAGGCCGGTAATACGACTCACTATAGGGGTTCAGAGTTCTACAGTCCGACGATCNNNNNNNNCAGTACTCGATCATG
	NlaIII_384-barcodes_210	CGATTGAGGCCGGTAATACGACTCACTATAGGGGTTCAGAGTTCTACAGTCCGACGATCNNNNNNNNAGTTGGTGGATCATG
	NlaIII_384-barcodes_211	CGATTGAGGCCGGTAATACGACTCACTATAGGGGTTCAGAGTTCTACAGTCCGACGATCNNNNNNNNGACCTTGGACTCATG
	NlaIII_384-barcodes_212	CGATTGAGGCCGGTAATACGACTCACTATAGGGGTTCAGAGTTCTACAGTCCGACGATCNNNNNNNNTAACTACCAGACATG
	NlaIII_384-barcodes_213	CGATTGAGGCCGGTAATACGACTCACTATAGGGGTTCAGAGTTCTACAGTCCGACGATCNNNNNNNNACCGAGCGTCTCATG
	NlaIII_384-barcodes_214	CGATTGAGGCCGGTAATACGACTCACTATAGGGGTTCAGAGTTCTACAGTCCGACGATCNNNNNNNNTATGAAGACGTCATG
	NlaIII_384-barcodes_215	CGATTGAGGCCGGTAATACGACTCACTATAGGGGTTCAGAGTTCTACAGTCCGACGATCNNNNNNNNATATCGTCTGGCATG
	NlaIII_384-barcodes_216	CGATTGAGGCCGGTAATACGACTCACTATAGGGGTTCAGAGTTCTACAGTCCGACGATCNNNNNNNNCAATACAGAGTCATG
	NlaIII_384-barcodes_217	CGATTGAGGCCGGTAATACGACTCACTATAGGGGTTCAGAGTTCTACAGTCCGACGATCNNNNNNNNCGCACGTTCTGCATG
	NlaIII_384-barcodes_218	CGATTGAGGCCGGTAATACGACTCACTATAGGGGTTCAGAGTTCTACAGTCCGACGATCNNNNNNNNGGATATGTCCGCATG
	NlaIII_384-barcodes_219	CGATTGAGGCCGGTAATACGACTCACTATAGGGGTTCAGAGTTCTACAGTCCGACGATCNNNNNNNNTCGACATCTGTCATG
	NlaIII_384-barcodes_220	CGATTGAGGCCGGTAATACGACTCACTATAGGGGTTCAGAGTTCTACAGTCCGACGATCNNNNNNNNAGAGACGACACCATG
	NlaIII_384-barcodes_221	CGATTGAGGCCGGTAATACGACTCACTATAGGGGTTCAGAGTTCTACAGTCCGACGATCNNNNNNNNTCACAACATAGCATG
	NlaIII_384-barcodes_222	CGATTGAGGCCGGTAATACGACTCACTATAGGGGTTCAGAGTTCTACAGTCCGACGATCNNNNNNNNCTGAGTGATGTCATG
	NlaIII_384-barcodes_223	CGATTGAGGCCGGTAATACGACTCACTATAGGGGTTCAGAGTTCTACAGTCCGACGATCNNNNNNNNCACTGGAATTACATG
	NlaIII_384-barcodes_224	CGATTGAGGCCGGTAATACGACTCACTATAGGGGTTCAGAGTTCTACAGTCCGACGATCNNNNNNNNTGCGAGCAGTTCATG
	NlaIII_384-barcodes_225	CGATTGAGGCCGGTAATACGACTCACTATAGGGGTTCAGAGTTCTACAGTCCGACGATCNNNNNNNNTGAGTTCATACCATG
	NlaIII_384-barcodes_226	CGATTGAGGCCGGTAATACGACTCACTATAGGGGTTCAGAGTTCTACAGTCCGACGATCNNNNNNNNTAGGTATGAAGCATG
	NlaIII_384-barcodes_227	CGATTGAGGCCGGTAATACGACTCACTATAGGGGTTCAGAGTTCTACAGTCCGACGATCNNNNNNNNCTTGCTATGCTCATG
	NlaIII_384-barcodes_228	CGATTGAGGCCGGTAATACGACTCACTATAGGGGTTCAGAGTTCTACAGTCCGACGATCNNNNNNNNCAAGCGCATGTCATG
	NlaIII_384-barcodes_229	CGATTGAGGCCGGTAATACGACTCACTATAGGGGTTCAGAGTTCTACAGTCCGACGATCNNNNNNNNTGTTACGTACCCATG
	NlaIII_384-barcodes_230	CGATTGAGGCCGGTAATACGACTCACTATAGGGGTTCAGAGTTCTACAGTCCGACGATCNNNNNNNNTCATGGTACGTCATG
	NlaIII_384-barcodes_231	CGATTGAGGCCGGTAATACGACTCACTATAGGGGTTCAGAGTTCTACAGTCCGACGATCNNNNNNNNCGGTTGGTGTACATG
	NlaIII_384-barcodes_232	CGATTGAGGCCGGTAATACGACTCACTATAGGGGTTCAGAGTTCTACAGTCCGACGATCNNNNNNNNATAGTATCGGCCATG
	NlaIII_384-barcodes_233	CGATTGAGGCCGGTAATACGACTCACTATAGGGGTTCAGAGTTCTACAGTCCGACGATCNNNNNNNNTTAAGTCGGCGCATG
	NlaIII_384-barcodes_234	CGATTGAGGCCGGTAATACGACTCACTATAGGGGTTCAGAGTTCTACAGTCCGACGATCNNNNNNNNCATATTCGTTGCATG
	NlaIII_384-barcodes_235	CGATTGAGGCCGGTAATACGACTCACTATAGGGGTTCAGAGTTCTACAGTCCGACGATCNNNNNNNNACCGTGCACTGCATG
	NlaIII_384-barcodes_236	CGATTGAGGCCGGTAATACGACTCACTATAGGGGTTCAGAGTTCTACAGTCCGACGATCNNNNNNNNTACGAATCGGACATG
	NlaIII_384-barcodes_237	CGATTGAGGCCGGTAATACGACTCACTATAGGGGTTCAGAGTTCTACAGTCCGACGATCNNNNNNNNCCTGTTAGTAACATG
	NlaIII_384-barcodes_238	CGATTGAGGCCGGTAATACGACTCACTATAGGGGTTCAGAGTTCTACAGTCCGACGATCNNNNNNNNTGGAGACGGTACATG
	NlaIII_384-barcodes_239	CGATTGAGGCCGGTAATACGACTCACTATAGGGGTTCAGAGTTCTACAGTCCGACGATCNNNNNNNNTCGTGTAGGCCCATG
	NlaIII_384-barcodes_240	CGATTGAGGCCGGTAATACGACTCACTATAGGGGTTCAGAGTTCTACAGTCCGACGATCNNNNNNNNCAATATGGTTCCATG
	NlaIII_384-barcodes_241	CGATTGAGGCCGGTAATACGACTCACTATAGGGGTTCAGAGTTCTACAGTCCGACGATCNNNNNNNNCCGTCTTCCAGCATG
	NlaIII_384-barcodes_242	CGATTGAGGCCGGTAATACGACTCACTATAGGGGTTCAGAGTTCTACAGTCCGACGATCNNNNNNNNGAACATGAGGCCATG
	NlaIII_384-barcodes_243	CGATTGAGGCCGGTAATACGACTCACTATAGGGGTTCAGAGTTCTACAGTCCGACGATCNNNNNNNNGTCTCGGACGTCATG
	NlaIII_384-barcodes_244	CGATTGAGGCCGGTAATACGACTCACTATAGGGGTTCAGAGTTCTACAGTCCGACGATCNNNNNNNNGTTGCGTCACTCATG
	NlaIII_384-barcodes_245	CGATTGAGGCCGGTAATACGACTCACTATAGGGGTTCAGAGTTCTACAGTCCGACGATCNNNNNNNNCGCTATTGGCGCATG
	NlaIII_384-barcodes_246	CGATTGAGGCCGGTAATACGACTCACTATAGGGGTTCAGAGTTCTACAGTCCGACGATCNNNNNNNNATCAGATTCGTCATG
	NlaIII_384-barcodes_247	CGATTGAGGCCGGTAATACGACTCACTATAGGGGTTCAGAGTTCTACAGTCCGACGATCNNNNNNNNTGACGTCGAATCATG
	NlaIII_384-barcodes_248	CGATTGAGGCCGGTAATACGACTCACTATAGGGGTTCAGAGTTCTACAGTCCGACGATCNNNNNNNNGATATCCTCGCCATG
	NlaIII_384-barcodes_249	CGATTGAGGCCGGTAATACGACTCACTATAGGGGTTCAGAGTTCTACAGTCCGACGATCNNNNNNNNCGCGTGACTACCATG
	NlaIII_384-barcodes_250	CGATTGAGGCCGGTAATACGACTCACTATAGGGGTTCAGAGTTCTACAGTCCGACGATCNNNNNNNNGCGGAATGTATCATG
	NlaIII_384-barcodes_251	CGATTGAGGCCGGTAATACGACTCACTATAGGGGTTCAGAGTTCTACAGTCCGACGATCNNNNNNNNGTATACCGGCCCATG
	NlaIII_384-barcodes_252	CGATTGAGGCCGGTAATACGACTCACTATAGGGGTTCAGAGTTCTACAGTCCGACGATCNNNNNNNNGTCCTTCAGCGCATG
	NlaIII_384-barcodes_253	CGATTGAGGCCGGTAATACGACTCACTATAGGGGTTCAGAGTTCTACAGTCCGACGATCNNNNNNNNCGACTTCCGTACATG
	NlaIII_384-barcodes_254	CGATTGAGGCCGGTAATACGACTCACTATAGGGGTTCAGAGTTCTACAGTCCGACGATCNNNNNNNNCACGAGACCTGCATG
	NlaIII_384-barcodes_255	CGATTGAGGCCGGTAATACGACTCACTATAGGGGTTCAGAGTTCTACAGTCCGACGATCNNNNNNNNTCGGCTAACCGCATG
	NlaIII_384-barcodes_256	CGATTGAGGCCGGTAATACGACTCACTATAGGGGTTCAGAGTTCTACAGTCCGACGATCNNNNNNNNGCAAGCACTGGCATG
	NlaIII_384-barcodes_257	CGATTGAGGCCGGTAATACGACTCACTATAGGGGTTCAGAGTTCTACAGTCCGACGATCNNNNNNNNTAGTGGCGCCTCATG
	NlaIII_384-barcodes_258	CGATTGAGGCCGGTAATACGACTCACTATAGGGGTTCAGAGTTCTACAGTCCGACGATCNNNNNNNNGCACTCCTTAACATG
	NlaIII_384-barcodes_259	CGATTGAGGCCGGTAATACGACTCACTATAGGGGTTCAGAGTTCTACAGTCCGACGATCNNNNNNNNGACTCCTGCTCCATG
	NlaIII_384-barcodes_260	CGATTGAGGCCGGTAATACGACTCACTATAGGGGTTCAGAGTTCTACAGTCCGACGATCNNNNNNNNAGTGGCCGATACATG
	NlaIII_384-barcodes_261	CGATTGAGGCCGGTAATACGACTCACTATAGGGGTTCAGAGTTCTACAGTCCGACGATCNNNNNNNNGCATCATCTAACATG
	NlaIII_384-barcodes_262	CGATTGAGGCCGGTAATACGACTCACTATAGGGGTTCAGAGTTCTACAGTCCGACGATCNNNNNNNNGGCACACGTACCATG
	NlaIII_384-barcodes_263	CGATTGAGGCCGGTAATACGACTCACTATAGGGGTTCAGAGTTCTACAGTCCGACGATCNNNNNNNNCAACGTGATCACATG
	NlaIII_384-barcodes_264	CGATTGAGGCCGGTAATACGACTCACTATAGGGGTTCAGAGTTCTACAGTCCGACGATCNNNNNNNNTCTTCGACTGACATG
	NlaIII_384-barcodes_265	CGATTGAGGCCGGTAATACGACTCACTATAGGGGTTCAGAGTTCTACAGTCCGACGATCNNNNNNNNGTTCTGGAATGCATG
	NlaIII_384-barcodes_266	CGATTGAGGCCGGTAATACGACTCACTATAGGGGTTCAGAGTTCTACAGTCCGACGATCNNNNNNNNCGTTCTAGCGGCATG
	NlaIII_384-barcodes_267	CGATTGAGGCCGGTAATACGACTCACTATAGGGGTTCAGAGTTCTACAGTCCGACGATCNNNNNNNNGCGCAAGTATTCATG
	NlaIII_384-barcodes_268	CGATTGAGGCCGGTAATACGACTCACTATAGGGGTTCAGAGTTCTACAGTCCGACGATCNNNNNNNNCATAGATGAGACATG
	NlaIII_384-barcodes_269	CGATTGAGGCCGGTAATACGACTCACTATAGGGGTTCAGAGTTCTACAGTCCGACGATCNNNNNNNNAACAGAGTGCACATG
	NlaIII_384-barcodes_270	CGATTGAGGCCGGTAATACGACTCACTATAGGGGTTCAGAGTTCTACAGTCCGACGATCNNNNNNNNACCAAGATCAACATG
	NlaIII_384-barcodes_271	CGATTGAGGCCGGTAATACGACTCACTATAGGGGTTCAGAGTTCTACAGTCCGACGATCNNNNNNNNGTTGCAACTAGCATG
	NlaIII_384-barcodes_272	CGATTGAGGCCGGTAATACGACTCACTATAGGGGTTCAGAGTTCTACAGTCCGACGATCNNNNNNNNAGGAACAATGTCATG
	NlaIII_384-barcodes_273	CGATTGAGGCCGGTAATACGACTCACTATAGGGGTTCAGAGTTCTACAGTCCGACGATCNNNNNNNNTAGATGAGGCACATG
	NlaIII_384-barcodes_274	CGATTGAGGCCGGTAATACGACTCACTATAGGGGTTCAGAGTTCTACAGTCCGACGATCNNNNNNNNCCAATTGTCCACATG
	NlaIII_384-barcodes_275	CGATTGAGGCCGGTAATACGACTCACTATAGGGGTTCAGAGTTCTACAGTCCGACGATCNNNNNNNNGCACAATCGTCCATG
	NlaIII_384-barcodes_276	CGATTGAGGCCGGTAATACGACTCACTATAGGGGTTCAGAGTTCTACAGTCCGACGATCNNNNNNNNAGTCACTAGAACATG
	NlaIII_384-barcodes_277	CGATTGAGGCCGGTAATACGACTCACTATAGGGGTTCAGAGTTCTACAGTCCGACGATCNNNNNNNNAGTGACACAGCCATG
	NlaIII_384-barcodes_278	CGATTGAGGCCGGTAATACGACTCACTATAGGGGTTCAGAGTTCTACAGTCCGACGATCNNNNNNNNAAGTCTGATACCATG
	NlaIII_384-barcodes_279	CGATTGAGGCCGGTAATACGACTCACTATAGGGGTTCAGAGTTCTACAGTCCGACGATCNNNNNNNNAAGAATTCCTCCATG
	NlaIII_384-barcodes_280	CGATTGAGGCCGGTAATACGACTCACTATAGGGGTTCAGAGTTCTACAGTCCGACGATCNNNNNNNNCGGTGGTCTGACATG
	NlaIII_384-barcodes_281	CGATTGAGGCCGGTAATACGACTCACTATAGGGGTTCAGAGTTCTACAGTCCGACGATCNNNNNNNNCGAGTGTTAATCATG
	NlaIII_384-barcodes_282	CGATTGAGGCCGGTAATACGACTCACTATAGGGGTTCAGAGTTCTACAGTCCGACGATCNNNNNNNNTGAATAGGAGCCATG
	NlaIII_384-barcodes_283	CGATTGAGGCCGGTAATACGACTCACTATAGGGGTTCAGAGTTCTACAGTCCGACGATCNNNNNNNNAGCAGCTAACCCATG
	NlaIII_384-barcodes_284	CGATTGAGGCCGGTAATACGACTCACTATAGGGGTTCAGAGTTCTACAGTCCGACGATCNNNNNNNNAGACTAGTCTACATG
	NlaIII_384-barcodes_285	CGATTGAGGCCGGTAATACGACTCACTATAGGGGTTCAGAGTTCTACAGTCCGACGATCNNNNNNNNGATTGATCTCCCATG
	NlaIII_384-barcodes_286	CGATTGAGGCCGGTAATACGACTCACTATAGGGGTTCAGAGTTCTACAGTCCGACGATCNNNNNNNNCATTAATGCACCATG
	NlaIII_384-barcodes_287	CGATTGAGGCCGGTAATACGACTCACTATAGGGGTTCAGAGTTCTACAGTCCGACGATCNNNNNNNNTACGACTTCCTCATG
	NlaIII_384-barcodes_288	CGATTGAGGCCGGTAATACGACTCACTATAGGGGTTCAGAGTTCTACAGTCCGACGATCNNNNNNNNTTCACAATCACCATG
	NlaIII_384-barcodes_289	CGATTGAGGCCGGTAATACGACTCACTATAGGGGTTCAGAGTTCTACAGTCCGACGATCNNNNNNNNTTCCTAGGCCGCATG
	NlaIII_384-barcodes_290	CGATTGAGGCCGGTAATACGACTCACTATAGGGGTTCAGAGTTCTACAGTCCGACGATCNNNNNNNNTGGAAGTGGAGCATG
	NlaIII_384-barcodes_291	CGATTGAGGCCGGTAATACGACTCACTATAGGGGTTCAGAGTTCTACAGTCCGACGATCNNNNNNNNAGCGATGAACGCATG
	NlaIII_384-barcodes_292	CGATTGAGGCCGGTAATACGACTCACTATAGGGGTTCAGAGTTCTACAGTCCGACGATCNNNNNNNNACGCTGCGATCCATG
	NlaIII_384-barcodes_293	CGATTGAGGCCGGTAATACGACTCACTATAGGGGTTCAGAGTTCTACAGTCCGACGATCNNNNNNNNCTCACTAGAGCCATG
	NlaIII_384-barcodes_294	CGATTGAGGCCGGTAATACGACTCACTATAGGGGTTCAGAGTTCTACAGTCCGACGATCNNNNNNNNATACGGATAACCATG
	NlaIII_384-barcodes_295	CGATTGAGGCCGGTAATACGACTCACTATAGGGGTTCAGAGTTCTACAGTCCGACGATCNNNNNNNNCGATTGGACCTCATG
	NlaIII_384-barcodes_296	CGATTGAGGCCGGTAATACGACTCACTATAGGGGTTCAGAGTTCTACAGTCCGACGATCNNNNNNNNCTGATAAGCGACATG
	NlaIII_384-barcodes_297	CGATTGAGGCCGGTAATACGACTCACTATAGGGGTTCAGAGTTCTACAGTCCGACGATCNNNNNNNNTTATGGATGCACATG
	NlaIII_384-barcodes_298	CGATTGAGGCCGGTAATACGACTCACTATAGGGGTTCAGAGTTCTACAGTCCGACGATCNNNNNNNNTGTGATCTGCACATG
	NlaIII_384-barcodes_299	CGATTGAGGCCGGTAATACGACTCACTATAGGGGTTCAGAGTTCTACAGTCCGACGATCNNNNNNNNTCTTGCGCCAACATG
	NlaIII_384-barcodes_300	CGATTGAGGCCGGTAATACGACTCACTATAGGGGTTCAGAGTTCTACAGTCCGACGATCNNNNNNNNTTGGCGACCATCATG
	NlaIII_384-barcodes_301	CGATTGAGGCCGGTAATACGACTCACTATAGGGGTTCAGAGTTCTACAGTCCGACGATCNNNNNNNNACTCGGTTGTACATG
	NlaIII_384-barcodes_302	CGATTGAGGCCGGTAATACGACTCACTATAGGGGTTCAGAGTTCTACAGTCCGACGATCNNNNNNNNGTACCGGTACACATG
	NlaIII_384-barcodes_303	CGATTGAGGCCGGTAATACGACTCACTATAGGGGTTCAGAGTTCTACAGTCCGACGATCNNNNNNNNTGGCGTATCAACATG
	NlaIII_384-barcodes_304	CGATTGAGGCCGGTAATACGACTCACTATAGGGGTTCAGAGTTCTACAGTCCGACGATCNNNNNNNNGGCTAGCATCGCATG
	NlaIII_384-barcodes_305	CGATTGAGGCCGGTAATACGACTCACTATAGGGGTTCAGAGTTCTACAGTCCGACGATCNNNNNNNNCTTAAGCATAGCATG
	NlaIII_384-barcodes_306	CGATTGAGGCCGGTAATACGACTCACTATAGGGGTTCAGAGTTCTACAGTCCGACGATCNNNNNNNNGACTAGAGGAACATG
	NlaIII_384-barcodes_307	CGATTGAGGCCGGTAATACGACTCACTATAGGGGTTCAGAGTTCTACAGTCCGACGATCNNNNNNNNTGAAGATCCATCATG
	NlaIII_384-barcodes_308	CGATTGAGGCCGGTAATACGACTCACTATAGGGGTTCAGAGTTCTACAGTCCGACGATCNNNNNNNNCAAGCAATGACCATG
	NlaIII_384-barcodes_309	CGATTGAGGCCGGTAATACGACTCACTATAGGGGTTCAGAGTTCTACAGTCCGACGATCNNNNNNNNCGCAATGTCATCATG
	NlaIII_384-barcodes_310	CGATTGAGGCCGGTAATACGACTCACTATAGGGGTTCAGAGTTCTACAGTCCGACGATCNNNNNNNNTGAATCGTGCGCATG
	NlaIII_384-barcodes_311	CGATTGAGGCCGGTAATACGACTCACTATAGGGGTTCAGAGTTCTACAGTCCGACGATCNNNNNNNNGCAGATCACAACATG
	NlaIII_384-barcodes_312	CGATTGAGGCCGGTAATACGACTCACTATAGGGGTTCAGAGTTCTACAGTCCGACGATCNNNNNNNNCAGACACGCTTCATG
	NlaIII_384-barcodes_313	CGATTGAGGCCGGTAATACGACTCACTATAGGGGTTCAGAGTTCTACAGTCCGACGATCNNNNNNNNAAGACATACGACATG
	NlaIII_384-barcodes_314	CGATTGAGGCCGGTAATACGACTCACTATAGGGGTTCAGAGTTCTACAGTCCGACGATCNNNNNNNNAGGACCGCATTCATG
	NlaIII_384-barcodes_315	CGATTGAGGCCGGTAATACGACTCACTATAGGGGTTCAGAGTTCTACAGTCCGACGATCNNNNNNNNTGTAAGAACTGCATG
	NlaIII_384-barcodes_316	CGATTGAGGCCGGTAATACGACTCACTATAGGGGTTCAGAGTTCTACAGTCCGACGATCNNNNNNNNTCTAGTGAACTCATG
	NlaIII_384-barcodes_317	CGATTGAGGCCGGTAATACGACTCACTATAGGGGTTCAGAGTTCTACAGTCCGACGATCNNNNNNNNGTTGTACACTTCATG
	NlaIII_384-barcodes_318	CGATTGAGGCCGGTAATACGACTCACTATAGGGGTTCAGAGTTCTACAGTCCGACGATCNNNNNNNNCTGCTCCGTTACATG
	NlaIII_384-barcodes_319	CGATTGAGGCCGGTAATACGACTCACTATAGGGGTTCAGAGTTCTACAGTCCGACGATCNNNNNNNNCCAAGACCTTACATG
	NlaIII_384-barcodes_320	CGATTGAGGCCGGTAATACGACTCACTATAGGGGTTCAGAGTTCTACAGTCCGACGATCNNNNNNNNAAGGCAGTCATCATG
	NlaIII_384-barcodes_321	CGATTGAGGCCGGTAATACGACTCACTATAGGGGTTCAGAGTTCTACAGTCCGACGATCNNNNNNNNACTGGCATCCGCATG
	NlaIII_384-barcodes_322	CGATTGAGGCCGGTAATACGACTCACTATAGGGGTTCAGAGTTCTACAGTCCGACGATCNNNNNNNNCTGCTGTCTAGCATG
	NlaIII_384-barcodes_323	CGATTGAGGCCGGTAATACGACTCACTATAGGGGTTCAGAGTTCTACAGTCCGACGATCNNNNNNNNCTGCCTAATTCCATG
	NlaIII_384-barcodes_324	CGATTGAGGCCGGTAATACGACTCACTATAGGGGTTCAGAGTTCTACAGTCCGACGATCNNNNNNNNGAACCTTCATACATG
	NlaIII_384-barcodes_325	CGATTGAGGCCGGTAATACGACTCACTATAGGGGTTCAGAGTTCTACAGTCCGACGATCNNNNNNNNGGTCACGCAAGCATG
	NlaIII_384-barcodes_326	CGATTGAGGCCGGTAATACGACTCACTATAGGGGTTCAGAGTTCTACAGTCCGACGATCNNNNNNNNGACGGTCACCTCATG
	NlaIII_384-barcodes_327	CGATTGAGGCCGGTAATACGACTCACTATAGGGGTTCAGAGTTCTACAGTCCGACGATCNNNNNNNNGTTATGGCTGTCATG
	NlaIII_384-barcodes_328	CGATTGAGGCCGGTAATACGACTCACTATAGGGGTTCAGAGTTCTACAGTCCGACGATCNNNNNNNNGTCGGTCTAGGCATG
	NlaIII_384-barcodes_329	CGATTGAGGCCGGTAATACGACTCACTATAGGGGTTCAGAGTTCTACAGTCCGACGATCNNNNNNNNTCAGACCTGGCCATG
	NlaIII_384-barcodes_330	CGATTGAGGCCGGTAATACGACTCACTATAGGGGTTCAGAGTTCTACAGTCCGACGATCNNNNNNNNTACGGAGATCGCATG
	NlaIII_384-barcodes_331	CGATTGAGGCCGGTAATACGACTCACTATAGGGGTTCAGAGTTCTACAGTCCGACGATCNNNNNNNNTATCATCGTGCCATG
	NlaIII_384-barcodes_332	CGATTGAGGCCGGTAATACGACTCACTATAGGGGTTCAGAGTTCTACAGTCCGACGATCNNNNNNNNGTCCACTGGTGCATG
	NlaIII_384-barcodes_333	CGATTGAGGCCGGTAATACGACTCACTATAGGGGTTCAGAGTTCTACAGTCCGACGATCNNNNNNNNCATCACTCTTACATG
	NlaIII_384-barcodes_334	CGATTGAGGCCGGTAATACGACTCACTATAGGGGTTCAGAGTTCTACAGTCCGACGATCNNNNNNNNCACTCCGTTGCCATG
	NlaIII_384-barcodes_335	CGATTGAGGCCGGTAATACGACTCACTATAGGGGTTCAGAGTTCTACAGTCCGACGATCNNNNNNNNTATCAACCGCGCATG
	NlaIII_384-barcodes_336	CGATTGAGGCCGGTAATACGACTCACTATAGGGGTTCAGAGTTCTACAGTCCGACGATCNNNNNNNNTACTTGGCGGTCATG
	NlaIII_384-barcodes_337	CGATTGAGGCCGGTAATACGACTCACTATAGGGGTTCAGAGTTCTACAGTCCGACGATCNNNNNNNNTGTTGTTCTTGCATG
	NlaIII_384-barcodes_338	CGATTGAGGCCGGTAATACGACTCACTATAGGGGTTCAGAGTTCTACAGTCCGACGATCNNNNNNNNATGGTTCTTCTCATG
	NlaIII_384-barcodes_339	CGATTGAGGCCGGTAATACGACTCACTATAGGGGTTCAGAGTTCTACAGTCCGACGATCNNNNNNNNAGGTCAGTTCGCATG
	NlaIII_384-barcodes_340	CGATTGAGGCCGGTAATACGACTCACTATAGGGGTTCAGAGTTCTACAGTCCGACGATCNNNNNNNNTCTCGGTATACCATG
	NlaIII_384-barcodes_341	CGATTGAGGCCGGTAATACGACTCACTATAGGGGTTCAGAGTTCTACAGTCCGACGATCNNNNNNNNGTCATACTACTCATG
	NlaIII_384-barcodes_342	CGATTGAGGCCGGTAATACGACTCACTATAGGGGTTCAGAGTTCTACAGTCCGACGATCNNNNNNNNCGAAGCAGGTCCATG
	NlaIII_384-barcodes_343	CGATTGAGGCCGGTAATACGACTCACTATAGGGGTTCAGAGTTCTACAGTCCGACGATCNNNNNNNNTCAGAGGTACGCATG
	NlaIII_384-barcodes_344	CGATTGAGGCCGGTAATACGACTCACTATAGGGGTTCAGAGTTCTACAGTCCGACGATCNNNNNNNNCTTAGATCGACCATG
	NlaIII_384-barcodes_345	CGATTGAGGCCGGTAATACGACTCACTATAGGGGTTCAGAGTTCTACAGTCCGACGATCNNNNNNNNGATCAGCTATCCATG
	NlaIII_384-barcodes_346	CGATTGAGGCCGGTAATACGACTCACTATAGGGGTTCAGAGTTCTACAGTCCGACGATCNNNNNNNNCATGGCCTGGTCATG
	NlaIII_384-barcodes_347	CGATTGAGGCCGGTAATACGACTCACTATAGGGGTTCAGAGTTCTACAGTCCGACGATCNNNNNNNNTCCTTATCCGCCATG
	NlaIII_384-barcodes_348	CGATTGAGGCCGGTAATACGACTCACTATAGGGGTTCAGAGTTCTACAGTCCGACGATCNNNNNNNNAAGCAGCCGTTCATG
	NlaIII_384-barcodes_349	CGATTGAGGCCGGTAATACGACTCACTATAGGGGTTCAGAGTTCTACAGTCCGACGATCNNNNNNNNGTGTCGCCTTCCATG
	NlaIII_384-barcodes_350	CGATTGAGGCCGGTAATACGACTCACTATAGGGGTTCAGAGTTCTACAGTCCGACGATCNNNNNNNNGTGCGTACTATCATG
	NlaIII_384-barcodes_351	CGATTGAGGCCGGTAATACGACTCACTATAGGGGTTCAGAGTTCTACAGTCCGACGATCNNNNNNNNCGAGACACGAACATG
	NlaIII_384-barcodes_352	CGATTGAGGCCGGTAATACGACTCACTATAGGGGTTCAGAGTTCTACAGTCCGACGATCNNNNNNNNCGGCGATTGGTCATG
	NlaIII_384-barcodes_353	CGATTGAGGCCGGTAATACGACTCACTATAGGGGTTCAGAGTTCTACAGTCCGACGATCNNNNNNNNTTATCTGACTCCATG
	NlaIII_384-barcodes_354	CGATTGAGGCCGGTAATACGACTCACTATAGGGGTTCAGAGTTCTACAGTCCGACGATCNNNNNNNNGCACCGCAATTCATG
	NlaIII_384-barcodes_355	CGATTGAGGCCGGTAATACGACTCACTATAGGGGTTCAGAGTTCTACAGTCCGACGATCNNNNNNNNGTCTGAGAACACATG
	NlaIII_384-barcodes_356	CGATTGAGGCCGGTAATACGACTCACTATAGGGGTTCAGAGTTCTACAGTCCGACGATCNNNNNNNNCCGCTAACACACATG
	NlaIII_384-barcodes_357	CGATTGAGGCCGGTAATACGACTCACTATAGGGGTTCAGAGTTCTACAGTCCGACGATCNNNNNNNNAGGCAATGATGCATG
	NlaIII_384-barcodes_358	CGATTGAGGCCGGTAATACGACTCACTATAGGGGTTCAGAGTTCTACAGTCCGACGATCNNNNNNNNAATGTCTCACACATG
	NlaIII_384-barcodes_359	CGATTGAGGCCGGTAATACGACTCACTATAGGGGTTCAGAGTTCTACAGTCCGACGATCNNNNNNNNCTGAAGGAACACATG
	NlaIII_384-barcodes_360	CGATTGAGGCCGGTAATACGACTCACTATAGGGGTTCAGAGTTCTACAGTCCGACGATCNNNNNNNNGGCTGTGGCTTCATG
	NlaIII_384-barcodes_361	CGATTGAGGCCGGTAATACGACTCACTATAGGGGTTCAGAGTTCTACAGTCCGACGATCNNNNNNNNCATGGTGGAACCATG
	NlaIII_384-barcodes_362	CGATTGAGGCCGGTAATACGACTCACTATAGGGGTTCAGAGTTCTACAGTCCGACGATCNNNNNNNNGTTCTCACCGGCATG
	NlaIII_384-barcodes_363	CGATTGAGGCCGGTAATACGACTCACTATAGGGGTTCAGAGTTCTACAGTCCGACGATCNNNNNNNNTCCGCTCTTATCATG
	NlaIII_384-barcodes_364	CGATTGAGGCCGGTAATACGACTCACTATAGGGGTTCAGAGTTCTACAGTCCGACGATCNNNNNNNNAGCCGAGGAGTCATG
	NlaIII_384-barcodes_365	CGATTGAGGCCGGTAATACGACTCACTATAGGGGTTCAGAGTTCTACAGTCCGACGATCNNNNNNNNTTGAGCTTCTACATG
	NlaIII_384-barcodes_366	CGATTGAGGCCGGTAATACGACTCACTATAGGGGTTCAGAGTTCTACAGTCCGACGATCNNNNNNNNGGCTTAATGCCCATG
	NlaIII_384-barcodes_367	CGATTGAGGCCGGTAATACGACTCACTATAGGGGTTCAGAGTTCTACAGTCCGACGATCNNNNNNNNAGTTAGGATGACATG
	NlaIII_384-barcodes_368	CGATTGAGGCCGGTAATACGACTCACTATAGGGGTTCAGAGTTCTACAGTCCGACGATCNNNNNNNNGAAGATTATCGCATG
	NlaIII_384-barcodes_369	CGATTGAGGCCGGTAATACGACTCACTATAGGGGTTCAGAGTTCTACAGTCCGACGATCNNNNNNNNGAGTAAGCTGACATG
	NlaIII_384-barcodes_370	CGATTGAGGCCGGTAATACGACTCACTATAGGGGTTCAGAGTTCTACAGTCCGACGATCNNNNNNNNAGGCTGTAGCGCATG
	NlaIII_384-barcodes_371	CGATTGAGGCCGGTAATACGACTCACTATAGGGGTTCAGAGTTCTACAGTCCGACGATCNNNNNNNNACATGTCTTACCATG
	NlaIII_384-barcodes_372	CGATTGAGGCCGGTAATACGACTCACTATAGGGGTTCAGAGTTCTACAGTCCGACGATCNNNNNNNNGAGGCCATAGTCATG
	NlaIII_384-barcodes_373	CGATTGAGGCCGGTAATACGACTCACTATAGGGGTTCAGAGTTCTACAGTCCGACGATCNNNNNNNNGAAGGCTCGACCATG
	NlaIII_384-barcodes_374	CGATTGAGGCCGGTAATACGACTCACTATAGGGGTTCAGAGTTCTACAGTCCGACGATCNNNNNNNNGAGGCTCGGATCATG
	NlaIII_384-barcodes_375	CGATTGAGGCCGGTAATACGACTCACTATAGGGGTTCAGAGTTCTACAGTCCGACGATCNNNNNNNNCGTATGACGGACATG
	NlaIII_384-barcodes_376	CGATTGAGGCCGGTAATACGACTCACTATAGGGGTTCAGAGTTCTACAGTCCGACGATCNNNNNNNNTCACAGATCTCCATG
	NlaIII_384-barcodes_377	CGATTGAGGCCGGTAATACGACTCACTATAGGGGTTCAGAGTTCTACAGTCCGACGATCNNNNNNNNTTCCGATCTGGCATG
	NlaIII_384-barcodes_378	CGATTGAGGCCGGTAATACGACTCACTATAGGGGTTCAGAGTTCTACAGTCCGACGATCNNNNNNNNGTTCCACAAGACATG
	NlaIII_384-barcodes_379	CGATTGAGGCCGGTAATACGACTCACTATAGGGGTTCAGAGTTCTACAGTCCGACGATCNNNNNNNNATCCATAGTCCCATG
	NlaIII_384-barcodes_380	CGATTGAGGCCGGTAATACGACTCACTATAGGGGTTCAGAGTTCTACAGTCCGACGATCNNNNNNNNTTGTATACGGTCATG
	NlaIII_384-barcodes_381	CGATTGAGGCCGGTAATACGACTCACTATAGGGGTTCAGAGTTCTACAGTCCGACGATCNNNNNNNNCTCTAGATTGTCATG
	NlaIII_384-barcodes_382	CGATTGAGGCCGGTAATACGACTCACTATAGGGGTTCAGAGTTCTACAGTCCGACGATCNNNNNNNNCCAAGGCAAGCCATG
	NlaIII_384-barcodes_383	CGATTGAGGCCGGTAATACGACTCACTATAGGGGTTCAGAGTTCTACAGTCCGACGATCNNNNNNNNGCTGGTTGCGACATG
	NlaIII_384-barcodes_384	CGATTGAGGCCGGTAATACGACTCACTATAGGGGTTCAGAGTTCTACAGTCCGACGATCNNNNNNNNTAACCGTATTGCATG
