# Supplementary material for: COVseq is a cost-effective workflow for mass-scaleSARS-CoV-2 genomic surveillance
Source: Research Square preprint supplement (doi:10.21203/rs.3.rs-147464/v1), 2021-01-19
Supplement: Supplementary file 4 [file d372d9f7970e8b38d915c86b.xlsx]

## Sheet: Pool #1
Supplementary Table 1. List of primers used in the CDC SARS-CoV-2 multiplexed PCR assay
	Amplicon #	Primer name	Sequence (5'->3')
	1	SC2M1-1_LEFT_31	ACCAACCAACTTTCGATCTCTTGT
		SC2M1-1_RIGHT_574	TGTCTCACCACTACGACCGTAC
	5	SC2M1-5_LEFT_1706	TCTGCTTCCACAAGTGCTTTTGT
		SC2M1-5_RIGHT_2266	ACAGGTGACAATTTGTCCACCG
	9	SC2M1-9_LEFT_3306	TGGAACTTACACCAGTTGTTCAGAC
		SC2M1-9_RIGHT_3878	CAGCGATCTTTTGTTCAACTTGCT
	13	SC2M1-13_LEFT_4885	TCCTACCACATTCCACCTAGATGG
		SC2M1-13_RIGHT_5400	GCACAAAAGTTAGCAGCTTCACC
	17	SC2M1-17_LEFT_6408	CTGAAGAAGTAGTGGAAAATCCTACCA
		SC2M1-17_RIGHT_6903	GCCTCTAGACAAAATTTACCGACACT
	21	SC2M1-21_LEFT_8004	TTGGTGATAGTGCGGAAGTTGC
		SC2M1-21_RIGHT_8553	CCACCCTTAAGTGCTATCTTTGTTGT
	25	SC2M1-25_LEFT_9551	CCAGTTTACTCATTCTTACCTGGTGT
		SC2M1-25_RIGHT_10061	AACCACTCTGCAAAACAGCTGA
	29	SC2M1-29_LEFT_11047	AGTCCAGAGTACTCAATGGTCTTTGT
		SC2M1-29_RIGHT_11541	ACAATACCTCTGGCCAAAAACATGA
	33	SC2M1-33_LEFT_12557	ATCCAACAGGTTGTAGATGCAGAT
		SC2M1-33_RIGHT_13136	TTGGTTGTCCCCCACTAGCTAG
	37	SC2M1-37_LEFT_14103	TTTCATACAAACCACGCCAGGT
		SC2M1-37_RIGHT_14641	GTGCAGCTACTGAAAAGCACGT
	41	SC2M1-41_LEFT_15637	AGAAATAGAGATGTTGACACAGACTTTGT
		SC2M1-41_RIGHT_16208	GCCTCATAAAACTCAGGTTCCCA
	45	SC2M1-45_LEFT_17317	AATGCATTGCCTGAGACGACAG
		SC2M1-45_RIGHT_17903	CAAGAGTGAGCTGTTTCAGTGGT
	49	SC2M1-49_LEFT_18897	TGTTAAGCGTGTTGACTGGACT
		SC2M1-49_RIGHT_19484	GCACCACCTAAATTGCAACGTG
	53	SC2M1-53_LEFT_20554	TCTGTAGTTTCTAAGGTTGTCAAAGTGA
		SC2M1-53_RIGHT_21144	AGCTAGCTTTTGTTGTATAAACCCACA
	57	SC2M1-57_LEFT_22203	GTGATCTCCCTCAGGGTTTTTCG
		SC2M1-57_RIGHT_22697	ACTTAAAAGTGGAAAATGATGCGGAA
	61	SC2M1-61_LEFT_23737	AATTCTACCAGTGTCTATGACCAAGAC
		SC2M1-61_RIGHT_24231	GCACCAAAGGTCCAACCAGAAG
	65	SC2M1-65_LEFT_25214	CTAGGTTTTATAGCTGGCTTGATTGC
		SC2M1-65_RIGHT_25790	CATTTCCAGCAAAGCCAAAGCC
	69	SC2M1-69_LEFT_26877	CTTCTCAACGTGCCACTCCATG
		SC2M1-69_RIGHT_27432	AGCGAGTGTTATCAGTGCCAAG
	73	SC2M1-73_LEFT_28525	TGGCTACTACCGAAGAGCTACC
		SC2M1-73_RIGHT_29045	GCTTCTTAGAAGCCTCAGCAGC

## Sheet: Pool #2
Supplementary Table 1. List of primers used in the CDC SARS-CoV-2 multiplexed PCR assay
	Amplicon #	Primer name	Sequence (5'->3')
	2	SC2M1-2_LEFT_445	TTTGCCTCAACTTGAACAGCCC
		SC2M1-2_RIGHT_965	GTTCACGGCAGCAGTATACACC
	6	SC2M1-6_LEFT_2138	AAACCCGTCCTTGATTGGCTTG
		SC2M1-6_RIGHT_2642	TTTCGAGCAACATAAGCCCGTT
	10	SC2M1-10_LEFT_3715	AGCTGGTATTTTTGGTGCTGACC
		SC2M1-10_RIGHT_4262	CCTGACCCGGGTAAGTGGTTAT
	14	SC2M1-14_LEFT_5258	ACTTCTATTAAATGGGCAGATAACAACTGT
		SC2M1-14_RIGHT_5818	AGCACCGTCTATGCAATACAAAGT
	18	SC2M1-18_LEFT_6748	AAACCGTGTTTGTACTAATTATATGCCTT
		SC2M1-18_RIGHT_7255	TGCCAAAAACCACTCTGCAACT
	22	SC2M1-22_LEFT_8407	CGTTAAAGATTTCATGTCATTGTCTGAACA
		SC2M1-22_RIGHT_8913	TGCAAAAAGTCACCATTAGTTGTGC
	26	SC2M1-26_LEFT_9903	AGTACAAGTATTTTAGTGGAGCAATGGA
		SC2M1-26_RIGHT_10451	TGGGCCTCATAGCACATTGGTA
	30	SC2M1-30_LEFT_11400	TGAATGTCTTGACACTCGTTTATAAAGTT
		SC2M1-30_RIGHT_11944	CTGGACACATTGAGCCCACAAT
	34	SC2M1-34_LEFT_13006	TGCCACAGTACGTCTACAAGCT
		SC2M1-34_RIGHT_13501	GTGTAAGACGGGCTGCACTTAC
	38	SC2M1-38_LEFT_14480	ACTTCAGAGAGCTAGGTGTTGTACA
		SC2M1-38_RIGHT_15027	TGCGAAAAGTGCATCTTGATCCT
	42	SC2M1-42_LEFT_16065	GGAGTATGCTGATGTCTTTCATTTGTAC
		SC2M1-42_RIGHT_16648	GCGTTTCTGCTGCAAAAAGCTT
	46	SC2M1-46_LEFT_17752	TGGAGAAAAGCTGTCTTTATTTCACCT
		SC2M1-46_RIGHT_18275	GCTTCTTCGCGGGTGATAAACA
	50	SC2M1-50_LEFT_19311	TGCATTCCACACACCAGCTTTT
		SC2M1-50_RIGHT_19866	ATTAGCAGCAATGTCCACACCC
	54	SC2M1-54_LEFT_20990	TGATTGGTGATTGTGCAACTGTACA
		SC2M1-54_RIGHT_21562	TGTTCGTTTAGTTGTTAACAAGAACATCA
	58	SC2M1-58_LEFT_22563	ACTTGTGCCCTTTTGGTGAAGT
		SC2M1-58_RIGHT_23128	TGCTGGTGCATGTAGAAGTTCA
	62	SC2M1-62_LEFT_24095	GCTGCTAGAGACCTCATTTGTGC
		SC2M1-62_RIGHT_24623	AAGCTCTGATTTCTGCAGCTCT
	66	SC2M1-66_LEFT_25665	CTCACACCTTTTGCTCGTTGCT
		SC2M1-66_RIGHT_26224	GTGCTTACAAAGGCACGCTAGT
	70	SC2M1-70_LEFT_27254	TTATGAGGACTTTTAAAGTTTCCATTTGGA
		SC2M1-70_RIGHT_27808	AGCAGAAAGGCTAAAAAGCACAAA
	74	SC2M1-74_LEFT_28918	TGATGCTGCTCTTGCTTTGCTG
		SC2M1-74_RIGHT_29469	TCTGCAGCAGGAAGAAGAGTCA
	78	SC2M1-52_LEFT2_20349	AGTCAGTTAGGTGGTTTACATCTACTGA
		SC2M1-52_RIGHT2_20798	TTTTGCGACATTCATCATTATGCCT

## Sheet: Pool #3
Supplementary Table 1. List of primers used in the CDC SARS-CoV-2 multiplexed PCR assay
	Amplicon #	Primer name	Sequence (5'->3')
	3	SC2M1-3_LEFT_827	AACAACTTCTGTGGCCCTGATG
		SC2M1-3_RIGHT_1395	TCTGAATTGTGACATGCTGGACA
	11	SC2M1-11_LEFT_4126	GGGTGATGTTGTTCAAGAGGGT
		SC2M1-11_RIGHT_4658	ACCGAGCAGCTTCTTCCAAATT
	15	SC2M1-15_LEFT_5677	TGTTATGATGTCAGCACCACCTG
		SC2M1-15_RIGHT_6172	AGCCACCACATCACCATTTAAGT
	19-2	SC2M1-19b_LEFT_7235	TGCAGAGTGGTTTTTGGCATATATTCT
		SC2M1-19_RIGHT_7694	ACTGTAGTGACAAGTCTCTCGCA
	23	SC2M1-23_LEFT_8778	TTAGCCAGCGTGGTGGTAGTTA
		SC2M1-23_RIGHT_9330	TCTACACCACAGAAAACTCCTGGT
	27	SC2M1-27_LEFT_10318	GCTTAAGGTTGATACAGCCAATCCT
		SC2M1-27_RIGHT_10837	AACGGCAATTCCAGTTTGAGCA
	31	SC2M1-31_LEFT_11810	GGCAAACCTTGTATCAAAGTAGCC
		SC2M1-31_RIGHT_12335	TTGCCCTCTTGTCCTCAGATCT
	35	SC2M1-35_LEFT_13366	AAACACAGTCTGTACCGTCTGC
		SC2M1-35_RIGHT_13861	TGTCACAATTACCTTCATCAAAATGCC
	39	SC2M1-39_LEFT_14888	ACGATGGTGGCTGTATTAATGCT
		SC2M1-39_RIGHT_15391	GGTGTGACAAGCTACAACACGT
	43	SC2M1-43_LEFT_16518	AAATACATGTGTTGGTAGCGATAATGTT
		SC2M1-43_RIGHT_17087	GGTGGTCCCTGGAGTGTAGAAT
	47	SC2M1-47_LEFT_18148	GGTTTATGTGTTGACATACCTGGCA
		SC2M1-47_RIGHT_18668	CATAGACAACAGGTGCGCTCAG
	51	SC2M1-51_LEFT_19725	TGATGGTGTTGATGTAGAATTGTTTGAA
		SC2M1-51_RIGHT_20255	TCAATTTCCATTTGACTCCTGGGT
	55	SC2M1-55_LEFT_21421	AGGGGTACTGCTGTTATGTCTTTAAA
		SC2M1-55_RIGHT_21916	AAGTAGGGACTGGGTCTTCGAA
	59	SC2M1-59_LEFT_22986	CCGGTAGCACACCTTGTAATGG
		SC2M1-59_RIGHT_23519	CCCCTATTAAACAGCCTGCACG
	63	SC2M1-63_LEFT_24493	AAATGATATCCTTTCACGTCTTGACAAA
		SC2M1-63_RIGHT_25003	TGAGTCTAATTCAGGTTGCAAAGGA
	67	SC2M1-67_LEFT_26096	AAAATTGTTGATGAGCCTGAAGAACA
		SC2M1-67_RIGHT_26590	ACTAGGTTCCATTGTTCAAGGAGC
	71	SC2M1-71_LEFT_27650	TGTTCATCAGACAAGAGGAAGTTCA
		SC2M1-71_RIGHT_28203	ACGAACAACGCACTACAAGACT
	75	SC2M1-75_LEFT_29344	TGACGCATACAAAACATTCCCAC
		SC2M1-75_RIGHT_29848	AAAATCACATGGGGATAGCACTACT

## Sheet: Pool #4
Supplementary Table 1. List of primers used in the CDC SARS-CoV-2 multiplexed PCR assay
	Amplicon #	Primer name	Sequence (5'->3')
	4	SC2M1-4_LEFT_1262	ACGGGCGATTTTGTTAAAGCCA
		SC2M1-4_RIGHT_1840	TCACCAATATTCCAGGCACCTTT
	8	SC2M1-8_LEFT_2932	ACTTACACCACTGGGCATTGATT
		SC2M1-8_RIGHT_3461	CTGCAACACCTCCTCCATGTTT
	12	SC2M1-12_LEFT_4519	TGGTGCTAGATTTTACTTTTACACCAGT
		SC2M1-12_RIGHT_5017	CACAACTTGCGTGTGGAGGTTA
	16	SC2M1-16_LEFT_6030	ACGCAAGCTTCGATAATTTTAAGTTTGT
		SC2M1-16_RIGHT_6544	TGTGTGGCCAACCTCTTCTGTA
	20	SC2M1-20_LEFT_7560	GGTCCTTTTATGTCTATGCTAATGGAGG
		SC2M1-20_RIGHT_8128	TGCAAGTTCAGCTTCTGCAGTT
	24	SC2M1-24_LEFT_9203	GATTCTGAGTACTGTAGGCACGG
		SC2M1-24_RIGHT_9734	AGAACCAATAGAAATGCTTTGTGGAAA
	28	SC2M1-28_LEFT_10697	GGAGACAGGTGGTTTCTCAATCG
		SC2M1-28_RIGHT_11209	AGCTACAGTGGCAAGAGAAGGT
	32	SC2M1-32_LEFT_12201	AGTTGAAGAAGTCTTTGAATGTGGCT
		SC2M1-32_RIGHT_12719	TCTGTCGTAGTGCAACAGGACT
	36	SC2M1-36_LEFT_13727	GCTGTTGCTAAACATGACTTCTTTAAGT
		SC2M1-36_RIGHT_14232	AGGCTTTGTTAAGTCAGTGTCAACA
	40	SC2M1-40_LEFT_15264	TGTAGAAAACCCTCACCTTATGGG
		SC2M1-40_RIGHT_15771	AGCCACTAGACCTTGAGATGCA
	44	SC2M1-44_LEFT_16948	CCTACACTAGTGCCACAAGAGC
		SC2M1-44_RIGHT_17458	GTGCAGGTAATTGAGCAGGGTC
	48	SC2M1-48_LEFT_18506	GACTTCCTTGGAATGTAGTGCGT
		SC2M1-48_RIGHT_19038	ACCAATGTCGTGAAGAACTGGG
	52	SC2M1-52_LEFT_20124	TGGAGAAGCCGTAAAAACACAGT
		SC2M1-52_RIGHT_20698	GATTAGGCATAGCAACACCCGG
	56	SC2M1-56_LEFT_21775	TGGGACCAATGGTACTAAGAGGT
		SC2M1-56_RIGHT_22345	ACCAGCTGTCCAACCTGAAGAA
	60	SC2M1-60_LEFT_23379	ACCAGGTTGCTGTTCTTTATCAGG
		SC2M1-60_RIGHT_23876	CAGCTATTCCAGTTAAAGCACGGT
	64	SC2M1-64_LEFT_24858	GCACACACTGGTTTGTAACACAA
		SC2M1-64_RIGHT_25369	TTTGACTCCTTTGAGCACTGGC
	68	SC2M1-68_LEFT_26454	TCCTGATCTTCTGGTCTAAACGAACT
		SC2M1-68_RIGHT_27004	ATGTCACAGCGTCCTAGATGGT
	72	SC2M1-72_LEFT_28066	TTGAATTGTGCGTGGATGAGGC
		SC2M1-72_RIGHT_28649	TAGCACCATAGGGAAGTCCAGC
	76	SC2M1-1_LEFT2_1	TTAAAGGTTTATACCTTCCCAGG
		SC2M1-1_RIGHT2_495	CGAGCATCCGAACGTTTGATGA

## Sheet: Pool #5
Supplementary Table 1. List of primers used in the CDC SARS-CoV-2 multiplexed PCR assay
	Amplicon #	Primer name	Sequence (5'->3')
	5W	W1_5L_1457	GTAAGGGTGGTCGCACTATTGC
		W1_5R_1969	TTGTTATAGCGGCCTTCTGTAAAAC
	81 *	SC2M1-19a_LEFT_6957	TGGTTTTTACTATTAAGTGTTTGCCTAGGT
		SC2M1-19a_RIGHT_7393	TCGGGGCCATTTGTACAAGATT
	81 *	SC2M1-19a_LEFT_6957	TGGTTTTTACTATTAAGTGTTTGCCTAGGT
		SC2M1-19a_RIGHT_7393	TCGGGGCCATTTGTACAAGATT
	83	SC2M1-21a_LEFT_7984	AGGCATTAGTGTCTGATGTTGGTG
		SC2M1-21a_RIGHT_8384	TGACTTTTTGCTACCTGCGCAT
	28W	W1_28L_9659	TCACACCTTTAGTACCTTTCTGGATAAC
		W1_28R_10207	GGTTAAGCATGTCTTCAGAGGTGC
	85	SC2M1-34a_LEFT_12994	GTAGTTTAGCTGCCACAGTACGT
		SC2M1-34a_RIGHT_13399	AACCTTTCCACATACCGCAGAC
	42	SC2M1-42_LEFT_16065	GGAGTATGCTGATGTCTTTCATTTGTAC
		SC2M1-42_RIGHT_16648	GCGTTTCTGCTGCAAAAAGCTT
	89	SC2M1-49a_LEFT_18711	CCTGTTGGCATCATTCTATTGGATTT
		SC2M1-49a_RIGHT_19112	GTCACTACAAGGCTGTGCATCA
	91	SC2M1-50a_LEFT_19181	TGCCTATTTTGGAATTGCAATGTCG
		SC2M1-50a_RIGHT_19569	AAACCCACAAGCTAAAGCCAGC
	93	SC2M1-51a_LEFT_19661	TTTGATGGACAACAGGGTGAAGT
		SC2M1-51a_RIGHT_20098	GCTTGTTTGGGACCTACAGATGG
	60W	W1_60L_21029	GGATCTCATTATTAGTGATATGTACGACCC
		W1_60R_21562	TTGTTCGTTTAGTTGTTAACAAGAACATC
	64W	W1_64L_22457	CAAAGTGTACGTTGAAATCCTTCACTG
		W1_64R_22993	TGCTACCGGCCTGATAGATTTC
	98	SC2M1-67a_LEFT_25910	GGCACAACAAGTCCTATTTCTGAAC
		SC2M1-67a_RIGHT_26276	CGTACCTGTCTCTTCCGAAACG
	100	SC2M1-69a_LEFT_26846	TGTGGTCATTCAATCCAGAAACTAACA
		SC2M1-69a_RIGHT_27226	ACCTGAAAGTCAACGAGATGAAACA
	102	SC2M1-70a_LEFT_27252	TTATGAGGACTTTTAAAGTTTCCATTTGGA
		SC2M1-70a_RIGHT_27644	AGGTGAAACTGATCTGGCACGT
	71	SC2M1-71_LEFT_27650	TGTTCATCAGACAAGAGGAAGTTCA
		SC2M1-71_RIGHT_28203	ACGAACAACGCACTACAAGACT
	95	0_1b	TTAAAGGTTTATACCTTCCCAGGTA
		W1_1R_490	CATCCGAACGTTTGATGAACAC
	36	SC2M1-36_LEFT_13727	GCTGTTGCTAAACATGACTTCTTTAAGT
		SC2M1-36_RIGHT_14232	AGGCTTTGTTAAGTCAGTGTCAACA
	* This amplicon is intentionally doubled accordingly to CDC suggestions

## Sheet: Pool #6
Supplementary Table 1. List of primers used in the CDC SARS-CoV-2 multiplexed PCR assay
	Amplicon #	Primer name	Sequence (5'->3')
	6W	W1_6L_1819	AGGTGCCTGGAATATTGGTGAAC
		W1_6R_2345	ATGATAGAGTCAGCACACAAAGC
	7ab	SC2M1-7a_LEFT_2491	AGGGAGAAACACTTCCCACAGA
		SC2M1-7b_RIGHT_3165	AGCAGAAGTGGCACCAAATTCC
	84	SC2M1-21b_LEFT_8240	TCAATCTGACATAGAAGTTACTGGCG
		SC2M1-21b_RIGHT_8618	GCAGCAACAAAAAGGAACACAAGT
	26W	W1_26L_8999	CTTGTGTTTTGGCTGCTGAATG
		W1_26R_9459	CATAAAATAGTAGGCAAGGCATGTTACTAC
	40W	W1_40L_13986	CGCCAAGCTTTGTTAAAAACAGTAC
		W1_40R_14503	TGTACAACACCTAGCTCTCTGAAGTG
	86	SC2M1-34b_LEFT_13245	CTGTACTGCCGTTGCCACATAG
		SC2M1-34b_RIGHT_13620	CGTCCTTTTCTTGGAAGCGACA
	90	SC2M1-49b_LEFT_18955	TGCGGCTTGTAGAAAGGTTCAA
		SC2M1-49b_RIGHT_19331	AAAAGCTGGTGTGTGGAATGCA
	92	SC2M1-50b_LEFT_19395	AGTCTCATGGAAAACAAGTAGTGTCA
		SC2M1-50b_RIGHT_19820	TGGTACTGGTTTAATGTTGCGCT
	94	SC2M1-51b_LEFT_19957	AACGATTTGTGCACCACTCACT
		SC2M1-51b_RIGHT_20373	TCAGTAGATGTAAACCACCTAACTGACT
	99	SC2M1-67b_LEFT_26128	TCACACAATCGACGGTTCATCC
		SC2M1-67b_RIGHT_26541	GTACCGTTGGAATCTGCCATGG
	101	SC2M1-69b_LEFT_27080	TAGCAGGTGACTCAGGTTTTGC
		SC2M1-69b_RIGHT_27443	AAGCTCACAAGTAGCGAGTGTT
	9	SC2M1-9_LEFT_3306	TGGAACTTACACCAGTTGTTCAGAC
		SC2M1-9_RIGHT_3878	CAGCGATCTTTTGTTCAACTTGCT
	75	SC2M1-75_LEFT_29344	TGACGCATACAAAACATTCCCAC
		SC2M1-75_RIGHT_29848	AAAATCACATGGGGATAGCACTACT
	70b	SC2M1-70b_LEFT_27497	TCTTCTGGAACATACGAGGGCA
		W1_34R_28006_1	AGGACACGGGTCATCAACTAC
	95	0_1b	TTAAAGGTTTATACCTTCCCAGGTA
		W1_1R_490	CATCCGAACGTTTGATGAACAC
	19-3	SC2M1-19b_LEFT_7235	TGCAGAGTGGTTTTTGGCATATATTCT
		W1_21R_7771	GATGGATGGAACCATTCTTCACTG
	62-2	SC2M1-62a1_LEFT_23993	ACCAAGCAAGAGGTCATTTATTGAAGA
		W1_30R_24625_1	CAGAAGCTCTGATTTCTGCAGC
