# Supplementary material for: COVseq is a cost-effective workflow for mass-scaleSARS-CoV-2 genomic surveillance
Source: Research Square preprint supplement (doi:10.21203/rs.3.rs-147464/v1), 2021-01-19
Supplement: Supplementary file 5 [file 1e6155b6faa405cace3e6df0.xlsx]

## Sheet: Summary of sequencing runs
Supplementary Table 2. Summary of sequencing results
Library name	Library description	Run type	Restriction enzyme used
MS45	NEBNext on supernatant (Sup)	SE75	-
MS47	COVseq WF #1 on supernatant (Sup)	SE150	NlaIII
MS65	COVseq WF #1 on supernatant (Sup)	SE150	MseI
TN9	COVseq WF #1 on supernatant (Sup)	SE150	NlaIII+MseI
MS49	NEBNext on sample 1	SE75	-
MS50	NEBNext on sample 2	SE75	-
MS51	NEBNext on sample 3	SE75	-
MS52	NEBNext on sample 4	SE75	-
MS53	NEBNext on sample 5	SE75	-
MS54	NEBNext on sample 6	SE75	-
MS55	NEBNext on sample 7	SE75	-
MS56	NEBNext on sample 8	SE75	-
MS57	NEBNext on sample 9	SE75	-
MS58	NEBNext on sample 10	SE75	-
MS59	NEBNext on sample 11	SE75	-
MS60	NEBNext on sample 12	SE75	-
MS61	NEBNext on sample 13	SE75	-
MS62	NEBNext on sample 14	SE75	-
MS63	NEBNext on sample 15	SE75	-
NZ138	NEBNext on sample 16	SE75	-
NZ139	NEBNext on sample 17	SE75	-
NZ140	NEBNext on sample 18	SE75	-
NZ141	NEBNext on sample 19	SE75	-
NZ142	NEBNext on sample 20	SE75	-
NZ143	NEBNext on sample 21	SE75	-
NZ144	NEBNext on sample 22	SE75	-
NZ145	NEBNext on sample 23	SE75	-
NZ146	NEBNext on sample 24	SE75	-
NZ147	NEBNext on sample 25	SE75	-
NZ148	NEBNext on sample 26	SE75	-
NZ149	NEBNext on sample 27	SE75	-
NZ150	NEBNext on sample 28	SE75	-
NZ151	NEBNext on sample 29	SE75	-
NZ152	NEBNext on sample 30	SE75	-
TN11	COVseq WF #1 on samples 1-30	SE150	NlaIII+MseI
TN21	COVseq WF #1 on samples 31-55 (Ref)	SE150	NlaIII+MseI
MS82	COVseq WF #2 on samples 31-55 (Rep1)	SE150	NlaIII+MseI
MS83	COVseq WF #2 on samples 31-55 (Rep2)	SE150	NlaIII+MseI
MS84	COVseq WF #2 on samples 31-55 (Rep3)	SE150	NlaIII+MseI
TN10	COVseq WF #3 on synthetic RNA of SARS-CoV-2	SE150	NlaIII+MseI

## Sheet: NEBNext Sup
Supplementary Table 2. Summary of sequencing results
Sample	Library	#QCFail	QCFailFraction	#DuplicateMarked	DuplicateFraction	#Unmapped	UnmappedFraction	#Mapped	MappedFraction	#MappedRead1	#MappedRead2	RatioMapped2vsMapped1	#MappedForward	MappedForwardFraction	#MappedReverse	MappedReverseFraction	#SecondaryAlignments	SecondaryAlignmentFraction	#SupplementaryAlignments	SupplementaryAlignmentFraction	#SplicedAlignments	SplicedAlignmentFraction	#Pairs	#MappedPairs	MappedPairsFraction	#MappedSameChr	MappedSameChrFraction	#MappedProperPair	MappedProperFraction	#ReferenceBp	#ReferenceNs	#AlignedBases	#MatchedBases	MatchRate	#MismatchedBases	MismatchRate	#DeletionsCigarD	DeletionRate	HomopolymerContextDel	#InsertionsCigarI	InsertionRate	HomopolymerContextIns	#SoftClippedCigarS	SoftClipRate	#HardClippedCigarH	HardClipRate	ErrorRate	MedianReadLength	DefaultLibraryLayout
MS45	MS45	0	0	0	0	0	0	3466880	1	3466880	0	0	1719598	0.496007	1747282	0.503993	14935	0.00430791	0	0	0	0	0	0	0	0	0	0	0	29903	0	237705695	237356103	0.998529	349592	0.00147069	23650	9.94928e-05	0.315476	12994	5.46642e-05	0.861628	1379929	0.0058052	0	0	0.00743005	76	0
[truncated: 8 more columns]

## Sheet: COVseq Sup
Supplementary Table 2. Summary of sequencing results
Sample	Library	#QCFail	QCFailFraction	#DuplicateMarked	DuplicateFraction	#Unmapped	UnmappedFraction	#Mapped	MappedFraction	#MappedRead1	#MappedRead2	RatioMapped2vsMapped1	#MappedForward	MappedForwardFraction	#MappedReverse	MappedReverseFraction	#SecondaryAlignments	SecondaryAlignmentFraction	#SupplementaryAlignments	SupplementaryAlignmentFraction	#SplicedAlignments	SplicedAlignmentFraction	#Pairs	#MappedPairs	MappedPairsFraction	#MappedSameChr	MappedSameChrFraction	#MappedProperPair	MappedProperFraction	#ReferenceBp	#ReferenceNs	#AlignedBases	#MatchedBases	MatchRate	#MismatchedBases	MismatchRate	#DeletionsCigarD	DeletionRate	HomopolymerContextDel	#InsertionsCigarI	InsertionRate	HomopolymerContextIns	#SoftClippedCigarS	SoftClipRate	#HardClippedCigarH	HardClipRate	ErrorRate	MedianReadLength	DefaultLibraryLayout
MS47	MS47	0	0	0	0	0	0	1617709	1	1617709	0	0	951618	0.58825	666091	0.41175	77295	0.0477805	0	0	0	0	0	0	0	0	0	0	0	29903	0	176492443	173151100	0.981068	3341343	0.0189319	24037	0.000136193	0.411532	50118	0.000283967	0.952652	819274	0.00464198	0	0	0.0239941	130	0
MS65	MS65	0	0	0	0	0	0	803692	1	803692	0	0	593256	0.738163	210436	0.261837	142404	0.177187	0	0	0	0	0	0	0	0	0	0	0	29903	0	78220387	77186747	0.986786	1033640	0.0132145	10468	0.000133827	0.385652	18253	0.000233353	0.901605	612084	0.00782512	0	0	0.0214068	130	0
TN9	TN9	0	0	0	0	0	0	1253732	1	1253732	0	0	883061	0.704346	370671	0.295654	363301	0.289776	0	0	0	0	0	0	0	0	0	0	0	29903	0	117849207	114706644	0.973334	3142563	0.026666	16872	0.000143166	0.374881	38914	0.000330202	0.943568	1066036	0.00904576	0	0	0.0361851	130	0
[truncated: 8 more columns]

## Sheet: NEBNext samples 1-30
Supplementary Table 2. Summary of sequencing results
Sample	Library	#QCFail	QCFailFraction	#DuplicateMarked	DuplicateFraction	#Unmapped	UnmappedFraction	#Mapped	MappedFraction	#MappedRead1	#MappedRead2	RatioMapped2vsMapped1	#MappedForward	MappedForwardFraction	#MappedReverse	MappedReverseFraction	#SecondaryAlignments	SecondaryAlignmentFraction	#SupplementaryAlignments	SupplementaryAlignmentFraction	#SplicedAlignments	SplicedAlignmentFraction	#Pairs	#MappedPairs	MappedPairsFraction	#MappedSameChr	MappedSameChrFraction	#MappedProperPair	MappedProperFraction	#ReferenceBp	#ReferenceNs	#AlignedBases	#MatchedBases	MatchRate	#MismatchedBases	MismatchRate	#DeletionsCigarD	DeletionRate	HomopolymerContextDel	#InsertionsCigarI	InsertionRate	HomopolymerContextIns	#SoftClippedCigarS	SoftClipRate	#HardClippedCigarH	HardClipRate	ErrorRate	MedianReadLength	DefaultLibraryLayout
MS49	MS49	0	0	0	0	0	0	31774	1	31774	0	0	16067	0.505665	15707	0.494335	441	0.0138793	0	0	0	0	0	0	0	0	0	0	0	29903	0	1992069	1989135	0.998527	2934	0.00147284	102	5.1203e-05	0.176471	17	8.53384e-06	0.470588	17970	0.00902077	0	0	0.0105533	76	0
MS50	MS50	0	0	0	0	0	0	280328	1	280328	0	0	138065	0.492512	142263	0.507488	3516	0.0125425	0	0	0	0	0	0	0	0	0	0	0	29903	0	19095971	19066887	0.998477	29084	0.00152304	874	4.57688e-05	0.564073	409	2.14181e-05	0.794621	110599	0.00579175	0	0	0.00738198	76	0
MS51	MS51	0	0	0	0	0	0	182812	1	182812	0	0	91757	0.50192	91055	0.49808	3544	0.019386	0	0	0	0	0	0	0	0	0	0	0	29903	0	11940143	11924311	0.998674	15832	0.00132595	912	7.6381e-05	0.740132	88	7.3701e-06	0.215909	95584	0.00800526	0	0	0.00941496	76	0
MS52	MS52	0	0	0	0	0	0	3184081	1	3184081	0	0	1605689	0.504286	1578392	0.495714	19096	0.00599733	0	0	0	0	0	0	0	0	0	0	0	29903	0	216581134	216365708	0.999005	215426	0.000994667	11849	5.47093e-05	0.358174	18134	8.37284e-05	0.909838	1352323	0.00624396	0	0	0.00737706	76	0
MS53	MS53	0	0	0	0	0	0	3170064	1	3170064	0	0	1599226	0.504478	1570838	0.495522	18410	0.00580745	0	0	0	0	0	0	0	0	0	0	0	29903	0	215434047	215176934	0.998807	257113	0.00119347	13104	6.0826e-05	0.353938	13111	6.08585e-05	0.78499	1358575	0.00630622	0	0	0.00762137	76	0
MS54	MS54	0	0	0	0	0	0	1332133	1	1332133	0	0	668138	0.501555	663995	0.498445	14530	0.0109073	0	0	0	0	0	0	0	0	0	0	0	29903	0	90459425	90344666	0.998731	114759	0.00126862	11601	0.000128245	0.340402	4872	5.38584e-05	0.882184	565947	0.00625636	0	0	0.00770709	76	0
MS55	MS55	0	0	0	0	0	0	2745573	1	2745573	0	0	1383024	0.503729	1362549	0.496271	16753	0.00610182	0	0	0	0	0	0	0	0	0	0	0	29903	0	187703312	187473961	0.998778	229351	0.00122188	14534	7.74307e-05	0.340099	8836	4.70743e-05	0.91478	1119234	0.00596278	0	0	0.00730917	76	0
MS56	MS56	0	0	0	0	0	0	1389677	1	1389677	0	0	695574	0.500529	694103	0.499471	16916	0.0121726	0	0	0	0	0	0	0	0	0	0	0	29903	0	94207601	94082125	0.998668	125476	0.00133191	14139	0.000150083	0.236863	5646	5.99315e-05	0.907191	598484	0.00635282	0	0	0.00789475	76	0
MS57	MS57	0	0	0	0	0	0	2948058	1	2948058	0	0	1486429	0.504206	1461629	0.495794	14268	0.0048398	0	0	0	0	0	0	0	0	0	0	0	29903	0	201992822	201756686	0.998831	236136	0.00116903	8621	4.26797e-05	0.362139	10992	5.44178e-05	0.918759	1181964	0.00585151	0	0	0.00711764	76	0
MS58	MS58	0	0	0	0	0	0	2586210	1	2586210	0	0	1305845	0.504926	1280365	0.495074	11402	0.00440877	0	0	0	0	0	0	0	0	0	0	0	29903	0	177398214	177203365	0.998902	194849	0.00109837	7755	4.37152e-05	0.355126	8660	4.88167e-05	0.92552	1017484	0.00573559	0	0	0.0069265	76	0
MS59	MS59	0	0	0	0	0	0	2844508	1	2844508	0	0	1435130	0.504527	1409378	0.495473	16009	0.00562804	0	0	0	0	0	0	0	0	0	0	0	29903	0	193323734	193129619	0.998996	194115	0.00100409	9377	4.85041e-05	0.364935	11363	5.87771e-05	0.912523	1200108	0.00620776	0	0	0.00731914	76	0
MS60	MS60	0	0	0	0	0	0	1061016	1	1061016	0	0	532682	0.502049	528334	0.497951	12428	0.0117133	0	0	0	0	0	0	0	0	0	0	0	29903	0	71781199	71691330	0.998748	89869	0.00125199	7803	0.000108705	0.151865	6165	8.5886e-05	0.926358	459145	0.00639645	0	0	0.00784303	76	0
MS61	MS61	0	0	0	0	0	0	2611113	1	2611113	0	0	1313907	0.503198	1297206	0.496802	20575	0.00787978	0	0	0	0	0	0	0	0	0	0	0	29903	0	177319112	177102637	0.998779	216475	0.00122082	10787	6.08338e-05	0.362473	10992	6.19899e-05	0.907933	1119999	0.00631629	0	0	0.00765994	76	0
MS62	MS62	0	0	0	0	0	0	3182820	1	3182820	0	0	1605589	0.504455	1577231	0.495545	19925	0.00626017	0	0	0	0	0	0	0	0	0	0	0	29903	0	215265772	215009574	0.99881	256198	0.00119015	12949	6.01535e-05	0.368368	15255	7.08659e-05	0.907047	1408475	0.00654296	0	0	0.00786413	76	0
MS63	MS63	0	0	0	0	0	0	3232986	1	3232986	0	0	1624715	0.502543	1608271	0.497457	30330	0.00938142	0	0	0	0	0	0	0	0	0	0	0	29903	0	221125415	220861265	0.998805	264150	0.00119457	15735	7.11587e-05	0.317699	17171	7.76528e-05	0.890513	1300217	0.00588	0	0	0.00722338	76	0
NZ138	NZ138	0	0	0	0	0	0	2160099	1	2160099	0	0	1092518	0.505772	1067581	0.494228	21985	0.0101778	0	0	0	0	0	0	0	0	0	0	0	29903	0	146029989	145791179	0.998365	238810	0.00163535	12702	8.69821e-05	0.500472	10906	7.46833e-05	0.901247	940534	0.00644069	0	0	0.00823771	76	0
NZ139	NZ139	0	0	0	0	0	0	31380	1	31380	0	0	16356	0.521224	15024	0.478776	770	0.0245379	0	0	0	0	0	0	0	0	0	0	0	29903	0	1888804	1884515	0.997729	4289	0.00227075	330	0.000174714	0.0787879	27	1.42948e-05	0.407407	20989	0.0111123	0	0	0.0135721	76	0
NZ140	NZ140	0	0	0	0	0	0	1145089	1	1145089	0	0	576198	0.503191	568891	0.496809	14514	0.012675	0	0	0	0	0	0	0	0	0	0	0	29903	0	76926129	76815986	0.998568	110143	0.0014318	4679	6.08246e-05	0.256251	3470	4.51082e-05	0.646974	518700	0.00674283	0	0	0.00828057	76	0
NZ141	NZ141	0	0	0	0	0	0	3941677	1	3941677	0	0	2001549	0.507791	1940128	0.492209	17745	0.00450189	0	0	0	0	0	0	0	0	0	0	0	29903	0	268966183	268561733	0.998496	404450	0.00150372	14930	5.55088e-05	0.350234	13456	5.00286e-05	0.914388	1615149	0.00600503	0	0	0.00761428	76	0
NZ142	NZ142	0	0	0	0	0	0	4299374	1	4299374	0	0	2177035	0.506361	2122339	0.493639	24718	0.00574921	0	0	0	0	0	0	0	0	0	0	0	29903	0	293239865	292801210	0.998504	438655	0.00149589	20115	6.85957e-05	0.350982	20061	6.84116e-05	0.907083	1767591	0.0060278	0	0	0.0076607	76	0
NZ143	NZ143	0	0	0	0	0	0	70466	1	70466	0	0	37220	0.528198	33246	0.471802	829	0.0117645	0	0	0	0	0	0	0	0	0	0	0	29903	0	4535772	4527927	0.99827	7845	0.00172958	290	6.39362e-05	0.6	70	1.54329e-05	0.328571	35822	0.00789766	0	0	0.00970662	76	0
NZ144	NZ144	0	0	0	0	0	0	3805122	1	3805122	0	0	1933270	0.50807	1871852	0.49193	16653	0.00437647	0	0	0	0	0	0	0	0	0	0	0	29903	0	259861612	259500945	0.998612	360667	0.00138792	13281	5.1108e-05	0.355395	13441	5.17237e-05	0.909605	1562442	0.00601259	0	0	0.00750334	76	0
NZ145	NZ145	0	0	0	0	0	0	2144946	1	2144946	0	0	1083455	0.50512	1061491	0.49488	19684	0.00917692	0	0	0	0	0	0	0	0	0	0	0	29903	0	145468764	145242993	0.998448	225771	0.00155202	16609	0.000114176	0.310856	8905	6.12159e-05	0.883324	916543	0.00630062	0	0	0.00802803	76	0
NZ146	NZ146	0	0	0	0	0	0	3794842	1	3794842	0	0	1924553	0.50715	1870289	0.49285	16337	0.00430505	0	0	0	0	0	0	0	0	0	0	0	29903	0	259956403	259521731	0.998328	434672	0.0016721	13855	5.32974e-05	0.351859	14541	5.59363e-05	0.91046	1501874	0.00577741	0	0	0.00755874	76	0
NZ147	NZ147	0	0	0	0	0	0	4015669	1	4015669	0	0	2037381	0.507358	1978288	0.492642	16897	0.00420777	0	0	0	0	0	0	0	0	0	0	0	29903	0	274552915	274156377	0.998556	396538	0.0014443	13500	4.91708e-05	0.368741	16406	5.97553e-05	0.916433	1600477	0.00582939	0	0	0.00738262	76	0
NZ148	NZ148	0	0	0	0	0	0	752148	1	752148	0	0	380118	0.505377	372030	0.494623	7177	0.00954201	0	0	0	0	0	0	0	0	0	0	0	29903	0	50805391	50736240	0.998639	69151	0.0013611	6706	0.000131994	0.360125	2021	3.97792e-05	0.796635	323406	0.00636558	0	0	0.00789845	76	0
NZ149	NZ149	0	0	0	0	0	0	48778	1	48778	0	0	25684	0.526549	23094	0.473451	580	0.0118906	0	0	0	0	0	0	0	0	0	0	0	29903	0	3052738	3040714	0.996061	12024	0.00393876	1244	0.000407503	0.0345659	29	9.49967e-06	0.241379	28253	0.00925497	0	0	0.0136107	76	0
NZ150	NZ150	0	0	0	0	0	0	257809	1	257809	0	0	130125	0.504734	127684	0.495266	3094	0.0120011	0	0	0	0	0	0	0	0	0	0	0	29903	0	17198167	17170331	0.998381	27836	0.00161854	1497	8.70442e-05	0.327989	1474	8.57068e-05	0.658752	116464	0.00677188	0	0	0.00856318	76	0
NZ151	NZ151	0	0	0	0	0	0	50808	1	50808	0	0	26218	0.516021	24590	0.483979	512	0.0100772	0	0	0	0	0	0	0	0	0	0	0	29903	0	3168989	3164267	0.99851	4722	0.00149007	1090	0.000343958	0.411009	584	0.000184286	0.957192	27655	0.00872676	0	0	0.0107451	76	0
NZ152	NZ152	0	0	0	0	0	0	45076	1	45076	0	0	23249	0.515773	21827	0.484227	535	0.0118688	0	0	0	0	0	0	0	0	0	0	0	29903	0	2834898	2827460	0.997376	7438	0.00262373	662	0.000233518	0.208459	469	0.000165438	0.776119	23611	0.00832869	0	0	0.0113514	76	0
[truncated: 8 more columns]

## Sheet: COVseq samples 1-30
Supplementary Table 2. Summary of sequencing results
Library	Sample	#QCFail	QCFailFraction	#DuplicateMarked	DuplicateFraction	#Unmapped	UnmappedFraction	#Mapped	MappedFraction	#MappedRead1	#MappedRead2	RatioMapped2vsMapped1	#MappedForward	MappedForwardFraction	#MappedReverse	MappedReverseFraction	#SecondaryAlignments	SecondaryAlignmentFraction	#SupplementaryAlignments	SupplementaryAlignmentFraction	#SplicedAlignments	SplicedAlignmentFraction	#Pairs	#MappedPairs	MappedPairsFraction	#MappedSameChr	MappedSameChrFraction	#MappedProperPair	MappedProperFraction	#ReferenceBp	#ReferenceNs	#AlignedBases	#MatchedBases	MatchRate	#MismatchedBases	MismatchRate	#DeletionsCigarD	DeletionRate	HomopolymerContextDel	#InsertionsCigarI	InsertionRate	HomopolymerContextIns	#SoftClippedCigarS	SoftClipRate	#HardClippedCigarH	HardClipRate	ErrorRate	MedianReadLength	DefaultLibraryLayout
TN11	sample10	0	0	0	0	0	0	465262	1	465262	0	0	330235	0.709783	135027	0.290217	166167	0.357147	0	0	0	0	0	0	0	0	0	0	0	29903	0	41551761	40548909	0.975865	1002852	0.024135	3985	9.59045e-05	0.475031	12519	0.000301287	0.949517	428100	0.0103028	0	0	0.034835	130	0
TN11	sample11	0	0	0	0	0	0	889784	1	889784	0	0	643062	0.722717	246722	0.277283	264449	0.297206	0	0	0	0	0	0	0	0	0	0	0	29903	0	85188534	83745599	0.983062	1442935	0.0169381	8672	0.000101798	0.467827	23337	0.000273945	0.952779	746755	0.00876591	0	0	0.0260798	130	0
TN11	sample12	0	0	0	0	0	0	415919	1	415919	0	0	317260	0.762793	98659	0.237207	58350	0.140292	0	0	0	0	0	0	0	0	0	0	0	29903	0	38593771	38014682	0.984995	579089	0.0150047	4879	0.000126419	0.328141	12884	0.000333836	0.95149	322905	0.00836676	0	0	0.0238317	130	0
TN11	sample13	0	0	0	0	0	0	905615	1	905615	0	0	635846	0.702115	269769	0.297885	274505	0.303114	0	0	0	0	0	0	0	0	0	0	0	29903	0	86213149	84868463	0.984403	1344686	0.0155972	9079	0.000105309	0.482102	27147	0.000314882	0.95447	735342	0.00852935	0	0	0.0245468	130	0
TN11	sample14	0	0	0	0	0	0	976170	1	976170	0	0	677626	0.694168	298544	0.305832	330117	0.338176	0	0	0	0	0	0	0	0	0	0	0	29903	0	91556247	90046694	0.983512	1509553	0.0164877	9937	0.000108534	0.447016	29581	0.000323091	0.950644	815870	0.00891113	0	0	0.0258305	130	0
TN11	sample15	0	0	0	0	0	0	791917	1	791917	0	0	557822	0.704395	234095	0.295605	225981	0.285359	0	0	0	0	0	0	0	0	0	0	0	29903	0	74863978	73471156	0.981395	1392822	0.0186047	7754	0.000103575	0.387671	22867	0.000305447	0.955657	633841	0.00846657	0	0	0.0274803	130	0
TN11	sample16	0	0	0	0	0	0	868704	1	868704	0	0	659997	0.759749	208707	0.240251	161421	0.185818	0	0	0	0	0	0	0	0	0	0	0	29903	0	81656785	80559526	0.986563	1097259	0.0134375	7874	9.6428e-05	0.577851	24690	0.000302363	0.962697	680401	0.00833245	0	0	0.0221687	130	0
TN11	sample17	0	0	0	0	0	0	48764	1	48764	0	0	43271	0.887355	5493	0.112645	7709	0.158088	0	0	0	0	0	0	0	0	0	0	0	29903	0	3366334	3335610	0.990873	30724	0.00912684	367	0.000109021	0.389646	685	0.000203485	0.929927	58955	0.0175131	0	0	0.0269525	130	0
TN11	sample18	0	0	0	0	0	0	823051	1	823051	0	0	689251	0.837434	133800	0.162566	102005	0.123935	0	0	0	0	0	0	0	0	0	0	0	29903	0	75925607	75222923	0.990745	702684	0.0092549	5147	6.779e-05	0.426851	19279	0.00025392	0.964625	738718	0.0097295	0	0	0.0193061	130	0
TN11	sample19	0	0	0	0	0	0	1182992	1	1182992	0	0	856377	0.723908	326615	0.276092	390733	0.330292	0	0	0	0	0	0	0	0	0	0	0	29903	0	110966965	109324127	0.985195	1642838	0.0148047	11040	9.94891e-05	0.448732	32128	0.000289528	0.954495	1041447	0.0093852	0	0	0.024579	130	0
TN11	sample1	0	0	0	0	0	0	72530	1	72530	0	0	68262	0.941155	4268	0.0588446	6432	0.0886805	0	0	0	0	0	0	0	0	0	0	0	29903	0	5279748	5243764	0.993185	35984	0.00681548	421	7.97387e-05	0.330166	858	0.000162508	0.946387	86639	0.0164097	0	0	0.0234674	130	0
TN11	sample20	0	0	0	0	0	0	818160	1	818160	0	0	552101	0.674808	266059	0.325192	270841	0.331037	0	0	0	0	0	0	0	0	0	0	0	29903	0	76077215	74778451	0.982928	1298764	0.0170717	8925	0.000117315	0.44056	24567	0.000322922	0.953759	692935	0.00910831	0	0	0.0266202	130	0
TN11	sample21	0	0	0	0	0	0	72868	1	72868	0	0	52021	0.713907	20847	0.286093	6390	0.0876928	0	0	0	0	0	0	0	0	0	0	0	29903	0	6629215	6504323	0.98116	124892	0.0188396	608	9.17152e-05	0.498355	1972	0.000297471	0.96501	61211	0.00923352	0	0	0.0284623	130	0
TN11	sample22	0	0	0	0	0	0	1131008	1	1131008	0	0	794829	0.702762	336179	0.297238	396256	0.350356	0	0	0	0	0	0	0	0	0	0	0	29903	0	104197254	102536995	0.984066	1660259	0.0159338	10193	9.78241e-05	0.458059	31323	0.000300613	0.949973	986752	0.00947004	0	0	0.0258023	130	0
TN11	sample23	0	0	0	0	0	0	2399115	1	2399115	0	0	1696760	0.707244	702355	0.292756	426662	0.177841	0	0	0	0	0	0	0	0	0	0	0	29903	0	235191638	231871757	0.985884	3319881	0.0141156	28326	0.000120438	0.423745	49990	0.00021255	0.955671	1899251	0.00807533	0	0	0.022524	130	0
TN11	sample24	0	0	0	0	0	0	884822	1	884822	0	0	602823	0.681293	281999	0.318707	318025	0.359423	0	0	0	0	0	0	0	0	0	0	0	29903	0	81412409	80060119	0.98339	1352290	0.0166104	8476	0.000104112	0.452454	26066	0.000320172	0.948017	760917	0.00934645	0	0	0.0263811	130	0
TN11	sample25	0	0	0	0	0	0	1246097	1	1246097	0	0	841626	0.67541	404471	0.32459	439441	0.352654	0	0	0	0	0	0	0	0	0	0	0	29903	0	115809801	113757359	0.982277	2052442	0.0177225	11376	9.823e-05	0.479079	37234	0.00032151	0.954826	1057056	0.00912752	0	0	0.0272698	130	0
TN11	sample26	0	0	0	0	0	0	590312	1	590312	0	0	468098	0.792967	122214	0.207033	79405	0.134514	0	0	0	0	0	0	0	0	0	0	0	29903	0	53232510	52496929	0.986182	735581	0.0138183	6916	0.000129921	0.550896	13271	0.000249303	0.954412	498778	0.0093698	0	0	0.0235673	130	0
TN11	sample27	0	0	0	0	0	0	40639	1	40639	0	0	35792	0.88073	4847	0.11927	5682	0.139816	0	0	0	0	0	0	0	0	0	0	0	29903	0	3083188	3054772	0.990784	28416	0.00921643	363	0.000117735	0.31405	656	0.000212767	0.9375	46167	0.0149738	0	0	0.0245207	130	0
TN11	sample28	0	0	0	0	0	0	173299	1	173299	0	0	146123	0.843184	27176	0.156816	10579	0.0610448	0	0	0	0	0	0	0	0	0	0	0	29903	0	14593917	14417181	0.98789	176736	0.0121103	1146	7.85259e-05	0.493019	5265	0.000360767	0.920228	156022	0.0106909	0	0	0.0232404	130	0
TN11	sample29	0	0	0	0	0	0	42312	1	42312	0	0	32745	0.773894	9567	0.226106	4090	0.0966629	0	0	0	0	0	0	0	0	0	0	0	29903	0	3373403	3316558	0.983149	56845	0.0168509	1868	0.000553744	0.14454	1113	0.000329934	0.959569	43858	0.0130011	0	0	0.0307357	130	0
TN11	sample2	0	0	0	0	0	0	154411	1	154411	0	0	132405	0.857484	22006	0.142516	10376	0.0671973	0	0	0	0	0	0	0	0	0	0	0	29903	0	12707592	12567246	0.988956	140346	0.0110443	1235	9.7186e-05	0.536032	1914	0.000150619	0.936782	118746	0.00934449	0	0	0.0206366	129	0
TN11	sample30	0	0	0	0	0	0	37760	1	37760	0	0	33048	0.875212	4712	0.124788	3621	0.0958951	0	0	0	0	0	0	0	0	0	0	0	29903	0	2989345	2961033	0.990529	28312	0.00947097	248	8.29613e-05	0.423387	712	0.000238179	0.970506	39501	0.0132139	0	0	0.023006	131	0
TN11	sample3	0	0	0	0	0	0	99847	1	99847	0	0	91416	0.915561	8431	0.0844392	11369	0.113864	0	0	0	0	0	0	0	0	0	0	0	29903	0	8077630	8015592	0.99232	62038	0.00768022	666	8.24499e-05	0.504505	2326	0.000287956	0.954428	91957	0.0113842	0	0	0.0194348	130	0
TN11	sample4	0	0	0	0	0	0	810397	1	810397	0	0	575526	0.710178	234871	0.289822	285208	0.351936	0	0	0	0	0	0	0	0	0	0	0	29903	0	75343103	74199087	0.984816	1144016	0.0151841	8146	0.000108119	0.461822	22914	0.000304129	0.947237	705915	0.00936934	0	0	0.0249657	130	0
TN11	sample5	0	0	0	0	0	0	1250173	1	1250173	0	0	875840	0.700575	374333	0.299425	363033	0.290386	0	0	0	0	0	0	0	0	0	0	0	29903	0	116720688	114921616	0.984587	1799072	0.0154135	12858	0.00011016	0.45077	30987	0.00026548	0.942202	1072034	0.00918461	0	0	0.0249737	130	0
TN11	sample6	0	0	0	0	0	0	823476	1	823476	0	0	653534	0.793628	169942	0.206372	156893	0.190525	0	0	0	0	0	0	0	0	0	0	0	29903	0	76352065	75380352	0.987273	971713	0.0127267	13404	0.000175555	0.361907	21259	0.000278434	0.961663	696248	0.00911892	0	0	0.0222996	130	0
TN11	sample7	0	0	0	0	0	0	1182045	1	1182045	0	0	835329	0.706681	346716	0.293319	354862	0.30021	0	0	0	0	0	0	0	0	0	0	0	29903	0	108426920	106391688	0.981229	2035232	0.0187705	13781	0.000127099	0.422538	31215	0.00028789	0.956431	1039843	0.00959027	0	0	0.0287758	130	0
TN11	sample8	0	0	0	0	0	0	657066	1	657066	0	0	497981	0.757886	159085	0.242114	134180	0.204211	0	0	0	0	0	0	0	0	0	0	0	29903	0	60440813	59565367	0.985516	875446	0.0144844	11338	0.000187588	0.323337	18808	0.00031118	0.966131	533118	0.0088205	0	0	0.0238036	130	0
TN11	sample9	0	0	0	0	0	0	879757	1	879757	0	0	602038	0.684323	277719	0.315677	317987	0.361449	0	0	0	0	0	0	0	0	0	0	0	29903	0	80177548	78004159	0.972893	2173389	0.0271072	7680	9.57874e-05	0.457813	25168	0.000313903	0.953075	795222	0.00991826	0	0	0.0374352	130	0
[truncated: 8 more columns]

## Sheet: COVseq samples 31-55 (Ref)
Supplementary Table 2. Summary of sequencing results
Library	Sample	#QCFail	QCFailFraction	#DuplicateMarked	DuplicateFraction	#Unmapped	UnmappedFraction	#Mapped	MappedFraction	#MappedRead1	#MappedRead2	RatioMapped2vsMapped1	#MappedForward	MappedForwardFraction	#MappedReverse	MappedReverseFraction	#SecondaryAlignments	SecondaryAlignmentFraction	#SupplementaryAlignments	SupplementaryAlignmentFraction	#SplicedAlignments	SplicedAlignmentFraction	#Pairs	#MappedPairs	MappedPairsFraction	#MappedSameChr	MappedSameChrFraction	#MappedProperPair	MappedProperFraction	#ReferenceBp	#ReferenceNs	#AlignedBases	#MatchedBases	MatchRate	#MismatchedBases	MismatchRate	#DeletionsCigarD	DeletionRate	HomopolymerContextDel	#InsertionsCigarI	InsertionRate	HomopolymerContextIns	#SoftClippedCigarS	SoftClipRate	#HardClippedCigarH	HardClipRate	ErrorRate	MedianReadLength	DefaultLibraryLayout
TN21	sample 48	0	0	0	0	0	0	314669	1	314669	0	0	297568	0.945654	17101	0.054346	33917	0.107786	0	0	0	0	0	0	0	0	0	0	0	29903	0	27774059	27588900	0.993333	185159	0.00666662	3096	0.000111471	0.404393	7603	0.000273745	0.956333	282192	0.0101603	0	0	0.0172121	131	0
TN21	sample 25	0	0	0	0	0	0	2943611	1	2943611	0	0	2169835	0.737134	773776	0.262866	1172909	0.398459	0	0	0	0	0	0	0	0	0	0	0	29903	0	273108515	269531648	0.986903	3576867	0.0130969	69323	0.00025383	0.157278	91818	0.000336196	0.954933	2647810	0.00969508	0	0	0.023382	130	0
TN21	sample 26	0	0	0	0	0	0	2017563	1	2017563	0	0	1568903	0.777623	448660	0.222377	411997	0.204205	0	0	0	0	0	0	0	0	0	0	0	29903	0	190294630	187735739	0.986553	2558891	0.013447	29927	0.000157267	0.462926	58506	0.00030745	0.967166	1748474	0.00918825	0	0	0.0231	130	0
TN21	Negative control 2	0	0	0	0	0	0	84717	1	84717	0	0	64995	0.767201	19722	0.232799	36017	0.425145	0	0	0	0	0	0	0	0	0	0	0	29903	0	7348818	7257274	0.987543	91544	0.012457	1256	0.000170912	0.316083	2258	0.00030726	0.947298	84221	0.0114605	0	0	0.0243956	130	0
TN21	sample 10	0	0	0	0	0	0	3260739	1	3260739	0	0	2448541	0.750916	812198	0.249084	1571300	0.481885	0	0	0	0	0	0	0	0	0	0	0	29903	0	287516516	284214828	0.988517	3301688	0.0114835	27481	9.55806e-05	0.437575	80176	0.000278857	0.946642	3200367	0.0111311	0	0	0.022989	130	0
TN21	Positive control 2	0	0	0	0	0	0	2811667	1	2811667	0	0	1980480	0.704379	831187	0.295621	1182914	0.420716	0	0	0	0	0	0	0	0	0	0	0	29903	0	256831651	253281406	0.986177	3550245	0.0138232	69382	0.000270146	0.306881	101483	0.000395134	0.951223	2506983	0.00976119	0	0	0.0242497	130	0
TN21	sample 11	0	0	0	0	0	0	1150152	1	1150152	0	0	945027	0.821654	205125	0.178346	180236	0.156706	0	0	0	0	0	0	0	0	0	0	0	29903	0	102909378	101840699	0.989615	1068679	0.0103847	16013	0.000155603	0.577281	28425	0.000276214	0.963026	997294	0.00969099	0	0	0.0205075	131	0
TN21	sample 29	0	0	0	0	0	0	528684	1	528684	0	0	403119	0.762495	125565	0.237505	68078	0.128769	0	0	0	0	0	0	0	0	0	0	0	29903	0	42865317	42146126	0.983222	719191	0.0167779	3785	8.82998e-05	0.47424	12817	0.000299006	0.969884	494909	0.0115457	0	0	0.0287109	130	0
TN21	Negative control 1	0	0	0	0	0	0	55606	1	55606	0	0	42865	0.77087	12741	0.22913	24320	0.437363	0	0	0	0	0	0	0	0	0	0	0	29903	0	4830025	4771219	0.987825	58806	0.0121751	697	0.000144306	0.373027	1357	0.000280951	0.94031	57550	0.0119151	0	0	0.0245154	130	0
TN21	sample 8	0	0	0	0	0	0	3255871	1	3255871	0	0	2371139	0.728266	884732	0.271734	1530351	0.470028	0	0	0	0	0	0	0	0	0	0	0	29903	0	287036268	282703208	0.984904	4333060	0.0150959	25421	8.85637e-05	0.455411	86188	0.000300269	0.952743	3172709	0.0110533	0	0	0.026538	130	0
TN21	Positive control 1	0	0	0	0	0	0	2710329	1	2710329	0	0	1922420	0.709294	787909	0.290706	1210960	0.446794	0	0	0	0	0	0	0	0	0	0	0	29903	0	247804312	244232402	0.985586	3571910	0.0144142	62542	0.000252385	0.341626	92930	0.000375014	0.951017	2454282	0.00990411	0	0	0.0249457	130	0
TN21	sample 9	0	0	0	0	0	0	2597408	1	2597408	0	0	1943726	0.748333	653682	0.251667	1202233	0.462859	0	0	0	0	0	0	0	0	0	0	0	29903	0	229759475	226682731	0.986609	3076744	0.0133912	23352	0.000101637	0.441418	66047	0.000287461	0.95052	2568537	0.0111792	0	0	0.0249595	130	0
TN21	sample 39	0	0	0	0	0	0	2392016	1	2392016	0	0	1683204	0.703676	708812	0.296324	1041771	0.43552	0	0	0	0	0	0	0	0	0	0	0	29903	0	220336868	216919438	0.98449	3417430	0.01551	21459	9.73918e-05	0.435016	79284	0.000359831	0.962035	2132235	0.00967716	0	0	0.0256444	130	0
TN21	sample 40	0	0	0	0	0	0	3816973	1	3816973	0	0	2782598	0.729006	1034375	0.270994	1795719	0.470456	0	0	0	0	0	0	0	0	0	0	0	29903	0	339254244	334730478	0.986666	4523766	0.0133344	31721	9.35021e-05	0.44201	104131	0.000306941	0.954173	3624500	0.0106837	0	0	0.0244186	130	0
TN21	sample 18	0	0	0	0	0	0	63083	1	63083	0	0	50082	0.793906	13001	0.206094	18610	0.295008	0	0	0	0	0	0	0	0	0	0	0	29903	0	4728509	4663151	0.986178	65358	0.0138221	677	0.000143174	0.267356	1567	0.000331394	0.950862	76507	0.0161799	0	0	0.0304766	130	0
TN21	sample 19	0	0	0	0	0	0	1243954	1	1243954	0	0	874507	0.703006	369447	0.296994	594605	0.477996	0	0	0	0	0	0	0	0	0	0	0	29903	0	108452924	106492097	0.98192	1960827	0.01808	9960	9.18371e-05	0.436245	36537	0.000336893	0.949832	1222731	0.0112743	0	0	0.029783	130	0
TN21	sample 24	0	0	0	0	0	0	248934	1	248934	0	0	126548	0.50836	122386	0.49164	37352	0.150048	0	0	0	0	0	0	0	0	0	0	0	29903	0	22972167	22393665	0.974817	578502	0.0251827	2982	0.000129809	0.569752	10196	0.000443841	0.976167	184429	0.00802837	0	0	0.0337848	130	0
TN21	sample 34	0	0	0	0	0	0	2794694	1	2794694	0	0	2035663	0.728403	759031	0.271597	1121690	0.401364	0	0	0	0	0	0	0	0	0	0	0	29903	0	256269541	252726292	0.986174	3543249	0.0138263	25649	0.000100086	0.443916	82487	0.000321876	0.960636	2457976	0.00959137	0	0	0.0238396	130	0
TN21	sample 35	0	0	0	0	0	0	903427	1	903427	0	0	724258	0.801678	179169	0.198322	121106	0.134052	0	0	0	0	0	0	0	0	0	0	0	29903	0	80867766	79728754	0.985915	1139012	0.0140849	6827	8.44218e-05	0.380401	20432	0.000252659	0.956392	779996	0.00964533	0	0	0.0240673	130	0
TN21	sample 49	0	0	0	0	0	0	3519163	1	3519163	0	0	2634244	0.748543	884919	0.251457	1454432	0.413289	0	0	0	0	0	0	0	0	0	0	0	29903	0	320191704	316036973	0.987024	4154731	0.0129758	87767	0.000274108	0.166042	106308	0.000332014	0.960831	3301111	0.0103098	0	0	0.0238917	130	0
TN21	sample 1	0	0	0	0	0	0	614075	1	614075	0	0	476147	0.775389	137928	0.224611	114170	0.185922	0	0	0	0	0	0	0	0	0	0	0	29903	0	54032656	53179067	0.984202	853589	0.0157977	41634	0.000770534	0.185065	16382	0.000303187	0.965999	546139	0.0101076	0	0	0.0269789	130	0
TN21	sample 50	0	0	0	0	0	0	1632065	1	1632065	0	0	1362268	0.83469	269797	0.16531	345438	0.211657	0	0	0	0	0	0	0	0	0	0	0	29903	0	158048210	156624206	0.99099	1424004	0.00900993	12641	7.99819e-05	0.394668	45176	0.000285837	0.962524	1278807	0.00809125	0	0	0.017467	131	0
TN21	sample 2	0	0	0	0	0	0	2964307	1	2964307	0	0	2325214	0.784404	639093	0.215596	1311351	0.44238	0	0	0	0	0	0	0	0	0	0	0	29903	0	264950862	262058707	0.989084	2892155	0.0109158	50185	0.000189412	0.228335	72267	0.000272756	0.948787	2979334	0.0112449	0	0	0.0226228	130	0
TN21	sample 42	0	0	0	0	0	0	66420	1	66420	0	0	60165	0.905827	6255	0.0941734	11810	0.177808	0	0	0	0	0	0	0	0	0	0	0	29903	0	5622357	5581407	0.992717	40950	0.00728342	2431	0.000432381	0.074455	13817	0.00245751	0.988348	64857	0.0115356	0	0	0.0217089	130	0
TN21	sample 43	0	0	0	0	0	0	2501143	1	2501143	0	0	1910547	0.76387	590596	0.23613	1042687	0.416884	0	0	0	0	0	0	0	0	0	0	0	29903	0	226642195	223871391	0.987775	2770804	0.0122255	20715	9.13996e-05	0.493845	60431	0.000266636	0.953385	2388996	0.0105408	0	0	0.0231243	130	0
TN21	sample 15	0	0	0	0	0	0	2213932	1	2213932	0	0	1670796	0.754674	543136	0.245326	917999	0.414646	0	0	0	0	0	0	0	0	0	0	0	29903	0	201316530	198235831	0.984697	3080699	0.0153028	21062	0.000104621	0.433245	61836	0.000307158	0.950886	2006597	0.00996737	0	0	0.0256819	130	0
TN21	sample 16	0	0	0	0	0	0	1937334	1	1937334	0	0	1460744	0.753997	476590	0.246003	863376	0.445652	0	0	0	0	0	0	0	0	0	0	0	29903	0	170399612	168204614	0.987119	2194998	0.0128815	42047	0.000246755	0.163103	48983	0.00028746	0.952024	1940240	0.0113864	0	0	0.0248021	130	0
TN21	sample 52	0	0	0	0	0	0	2516538	1	2516538	0	0	1915050	0.760986	601488	0.239014	1149929	0.456949	0	0	0	0	0	0	0	0	0	0	0	29903	0	224806862	222231437	0.988544	2575425	0.0114562	20713	9.21369e-05	0.438034	68618	0.000305231	0.953176	2503892	0.011138	0	0	0.0229915	130	0
TN21	sample 53	0	0	0	0	0	0	2848244	1	2848244	0	0	1973711	0.692957	874533	0.307043	1196455	0.420068	0	0	0	0	0	0	0	0	0	0	0	29903	0	260743354	256836874	0.985018	3906480	0.0149821	25848	9.9132e-05	0.433612	95242	0.000365271	0.964427	2524519	0.00968201	0	0	0.0251285	130	0
TN21	sample 5	0	0	0	0	0	0	2723655	1	2723655	0	0	2243551	0.823728	480104	0.176272	685732	0.251769	0	0	0	0	0	0	0	0	0	0	0	29903	0	249416802	246974894	0.99021	2441908	0.00979047	18682	7.49027e-05	0.495397	69497	0.000278638	0.960531	2498388	0.0100169	0	0	0.0201609	130	0
TN21	sample 32	0	0	0	0	0	0	228469	1	228469	0	0	195855	0.85725	32614	0.14275	30805	0.134832	0	0	0	0	0	0	0	0	0	0	0	29903	0	17605259	17413706	0.98912	191553	0.0108804	1645	9.3438e-05	0.331915	26531	0.00150699	0.991746	238320	0.0135369	0	0	0.0260177	130	0
TN21	sample 33	0	0	0	0	0	0	1214518	1	1214518	0	0	954597	0.785988	259921	0.214012	221554	0.182421	0	0	0	0	0	0	0	0	0	0	0	29903	0	100954578	99353494	0.984141	1601084	0.0158594	71212	0.000705387	0.314301	49433	0.000489656	0.980054	1128050	0.0111738	0	0	0.0282283	130	0
TN21	sample 54	0	0	0	0	0	0	2971829	1	2971829	0	0	2281150	0.767591	690679	0.232409	959328	0.322807	0	0	0	0	0	0	0	0	0	0	0	29903	0	280694326	276917492	0.986545	3776834	0.0134553	24782	8.82882e-05	0.343031	84818	0.000302172	0.966069	2560361	0.00912153	0	0	0.0229673	130	0
TN21	sample 6	0	0	0	0	0	0	3414340	1	3414340	0	0	2677918	0.784315	736422	0.215685	1243586	0.364224	0	0	0	0	0	0	0	0	0	0	0	29903	0	314647301	311354865	0.989536	3292436	0.0104639	33097	0.000105188	0.456386	76362	0.000242691	0.955109	3094040	0.00983336	0	0	0.0206451	130	0
TN21	sample 55	0	0	0	0	0	0	2268214	1	2268214	0	0	1694143	0.746906	574071	0.253094	1016200	0.448018	0	0	0	0	0	0	0	0	0	0	0	29903	0	204216354	201642146	0.987395	2574208	0.0126053	25649	0.000125597	0.327771	59823	0.000292939	0.953112	2164172	0.0105974	0	0	0.0236213	130	0
TN21	sample 7	0	0	0	0	0	0	4513553	1	4513553	0	0	3395655	0.752324	1117898	0.247676	2033424	0.450515	0	0	0	0	0	0	0	0	0	0	0	29903	0	394426852	388890270	0.985963	5536582	0.014037	36434	9.2372e-05	0.438519	117055	0.000296772	0.945573	4505748	0.0114235	0	0	0.0258497	130	0
TN21	sample 27	0	0	0	0	0	0	3186583	1	3186583	0	0	2317905	0.727395	868678	0.272605	1365234	0.428432	0	0	0	0	0	0	0	0	0	0	0	29903	0	291461744	287495019	0.98639	3966725	0.0136098	26230	8.99947e-05	0.447655	97015	0.000332857	0.961027	2991098	0.0102624	0	0	0.024295	130	0
TN21	sample 28	0	0	0	0	0	0	806448	1	806448	0	0	663688	0.822977	142760	0.177023	153325	0.190124	0	0	0	0	0	0	0	0	0	0	0	29903	0	71539016	70824050	0.990006	714966	0.00999407	23742	0.000331875	0.11368	31115	0.000434937	0.973325	688514	0.00962431	0	0	0.0203852	130	0
TN21	sample 44	0	0	0	0	0	0	217205	1	217205	0	0	178566	0.822108	38639	0.177892	26247	0.12084	0	0	0	0	0	0	0	0	0	0	0	29903	0	18187001	17985744	0.988934	201257	0.011066	1528	8.40161e-05	0.335079	3465	0.000190521	0.957864	191728	0.010542	0	0	0.0218826	130	0
TN21	sample 45	0	0	0	0	0	0	3045292	1	3045292	0	0	2253732	0.740071	791560	0.259929	1298229	0.426307	0	0	0	0	0	0	0	0	0	0	0	29903	0	278072386	273778894	0.98456	4293492	0.0154402	27315	9.82298e-05	0.435658	86086	0.000309581	0.961782	2801467	0.0100746	0	0	0.0259226	130	0
TN21	sample 17	0	0	0	0	0	0	4332523	1	4332523	0	0	3325037	0.76746	1007486	0.23254	1987501	0.45874	0	0	0	0	0	0	0	0	0	0	0	29903	0	387308039	382991839	0.988856	4316200	0.0111441	34105	8.80565e-05	0.437355	105295	0.000271864	0.947908	4271518	0.0110287	0	0	0.0225328	130	0
TN21	sample 46	0	0	0	0	0	0	1008275	1	1008275	0	0	808391	0.801756	199884	0.198244	124471	0.123449	0	0	0	0	0	0	0	0	0	0	0	29903	0	95242193	94167468	0.988716	1074725	0.0112841	9091	9.54514e-05	0.370696	34963	0.000367096	0.972943	779421	0.00818357	0	0	0.0199302	131	0
TN21	sample 47	0	0	0	0	0	0	3569348	1	3569348	0	0	2589484	0.725478	979864	0.274522	1728870	0.484366	0	0	0	0	0	0	0	0	0	0	0	29903	0	312212022	307726031	0.985632	4485991	0.0143684	27820	8.91061e-05	0.438605	94955	0.000304136	0.952504	3544047	0.0113514	0	0	0.0261131	130	0
TN21	sample 13	0	0	0	0	0	0	548992	1	548992	0	0	396320	0.721905	152672	0.278095	186850	0.340351	0	0	0	0	0	0	0	0	0	0	0	29903	0	50445638	49128960	0.973899	1316678	0.0261009	5086	0.000100821	0.428234	18584	0.000368397	0.966799	445324	0.0088278	0	0	0.0353979	130	0
TN21	sample 14	0	0	0	0	0	0	2398946	1	2398946	0	0	1842916	0.768219	556030	0.231781	1070692	0.446318	0	0	0	0	0	0	0	0	0	0	0	29903	0	212903714	209747855	0.985177	3155859	0.0148229	23015	0.000108101	0.426244	59579	0.00027984	0.952601	2390586	0.0112285	0	0	0.0264394	130	0
TN21	sample 36	0	0	0	0	0	0	3389776	1	3389776	0	0	2530686	0.746564	859090	0.253436	1529352	0.451166	0	0	0	0	0	0	0	0	0	0	0	29903	0	303012729	299405096	0.988094	3607633	0.0119059	31651	0.000104454	0.438912	91575	0.000302215	0.952968	3263534	0.0107703	0	0	0.0230828	130	0
TN21	sample 20	0	0	0	0	0	0	3322332	1	3322332	0	0	2478756	0.746089	843576	0.253911	1368981	0.412054	0	0	0	0	0	0	0	0	0	0	0	29903	0	303377586	299767047	0.988099	3610539	0.0119011	35977	0.000118588	0.441671	89093	0.00029367	0.94453	3091930	0.0101917	0	0	0.0225051	130	0
TN21	sample 21	0	0	0	0	0	0	593183	1	593183	0	0	507875	0.856186	85308	0.143814	66478	0.11207	0	0	0	0	0	0	0	0	0	0	0	29903	0	51198364	50724524	0.990745	473840	0.00925498	31039	0.00060625	0.925706	20495	0.000400306	0.975848	563042	0.0109973	0	0	0.0212588	130	0
TN21	sample 41	0	0	0	0	0	0	3565738	1	3565738	0	0	2629399	0.737407	936339	0.262593	1614236	0.452707	0	0	0	0	0	0	0	0	0	0	0	29903	0	321013454	316752673	0.986727	4260781	0.0132729	73687	0.000229545	0.17748	93357	0.00029082	0.953705	3424377	0.0106674	0	0	0.0244607	130	0
TN21	sample 3	0	0	0	0	0	0	2259801	1	2259801	0	0	1740743	0.770308	519058	0.229692	1059553	0.46887	0	0	0	0	0	0	0	0	0	0	0	29903	0	199942567	197742115	0.988995	2200452	0.0110054	18505	9.25516e-05	0.438422	55262	0.000276389	0.945496	2264575	0.0113261	0	0	0.0227005	130	0
TN21	sample 4	0	0	0	0	0	0	1548023	1	1548023	0	0	1218908	0.787397	329115	0.212603	292231	0.188777	0	0	0	0	0	0	0	0	0	0	0	29903	0	150155648	148472147	0.988788	1683501	0.0112117	13708	9.12919e-05	0.42705	41351	0.000275388	0.968465	1141059	0.00759917	0	0	0.0191776	131	0
TN21	sample 51	0	0	0	0	0	0	3789268	1	3789268	0	0	2943473	0.776792	845795	0.223208	1630015	0.430166	0	0	0	0	0	0	0	0	0	0	0	29903	0	345807235	342071650	0.989197	3735585	0.0108025	39884	0.000115336	0.408409	94577	0.000273496	0.953498	3618040	0.0104626	0	0	0.0216539	131	0
TN21	sample 30	0	0	0	0	0	0	345462	1	345462	0	0	257133	0.744316	88329	0.255684	37736	0.109233	0	0	0	0	0	0	0	0	0	0	0	29903	0	34233206	33742007	0.985651	491199	0.0143486	3378	9.86761e-05	0.422735	12702	0.000371043	0.971658	236481	0.00690794	0	0	0.0217263	130	0
TN21	sample 31	0	0	0	0	0	0	4866144	1	4866144	0	0	3492324	0.717678	1373820	0.282322	2323511	0.477485	0	0	0	0	0	0	0	0	0	0	0	29903	0	432124339	426124833	0.986116	5999506	0.0138837	47988	0.000111051	0.429649	138770	0.000321134	0.954572	4691860	0.0108577	0	0	0.0251736	130	0
TN21	sample 37	0	0	0	0	0	0	137362	1	137362	0	0	100726	0.733289	36636	0.266711	15954	0.116146	0	0	0	0	0	0	0	0	0	0	0	29903	0	13815738	13602120	0.984538	213618	0.0154619	1289	9.32994e-05	0.31187	5911	0.000427845	0.984097	94515	0.00684111	0	0	0.0228242	131	0
TN21	sample 38	0	0	0	0	0	0	3542939	1	3542939	0	0	2624694	0.740824	918245	0.259176	1604963	0.453003	0	0	0	0	0	0	0	0	0	0	0	29903	0	319328371	314990076	0.986414	4338295	0.0135857	81006	0.000253676	0.162988	100433	0.000314513	0.953203	3367144	0.0105445	0	0	0.0246983	130	0
TN21	sample 22	0	0	0	0	0	0	44827	1	44827	0	0	36869	0.822473	7958	0.177527	14911	0.332634	0	0	0	0	0	0	0	0	0	0	0	29903	0	3520941	3481434	0.988779	39507	0.0112206	682	0.000193698	0.225806	1000	0.000284015	0.936	54354	0.0154374	0	0	0.0271356	130	0
TN21	sample 23	0	0	0	0	0	0	73865	1	73865	0	0	61772	0.836282	12093	0.163718	23744	0.321451	0	0	0	0	0	0	0	0	0	0	0	29903	0	5535993	5476246	0.989208	59747	0.0107925	1114	0.000201229	0.232496	1510	0.00027276	0.939735	92456	0.0167009	0	0	0.0279673	130	0
TN21	Negative control 3	0	0	0	0	0	0	32043	1	32043	0	0	25057	0.78198	6986	0.21802	12868	0.401585	0	0	0	0	0	0	0	0	0	0	0	29903	0	2787083	2753744	0.988038	33339	0.011962	359	0.000128809	0.320334	899	0.000322559	0.949944	32191	0.0115501	0	0	0.0239634	130	0
TN21	sample 12	0	0	0	0	0	0	2624775	1	2624775	0	0	2059448	0.784619	565327	0.215381	1102960	0.420211	0	0	0	0	0	0	0	0	0	0	0	29903	0	240353365	237999349	0.990206	2354016	0.00979398	21763	9.05459e-05	0.474291	54333	0.000226055	0.949902	2493398	0.0103739	0	0	0.0204845	130	0
[truncated: 8 more columns]

## Sheet: COVseq samples 31-55 (Rep1)
Supplementary Table 2. Summary of sequencing results
Library	Sample	#QCFail	QCFailFraction	#DuplicateMarked	DuplicateFraction	#Unmapped	UnmappedFraction	#Mapped	MappedFraction	#MappedRead1	#MappedRead2	RatioMapped2vsMapped1	#MappedForward	MappedForwardFraction	#MappedReverse	MappedReverseFraction	#SecondaryAlignments	SecondaryAlignmentFraction	#SupplementaryAlignments	SupplementaryAlignmentFraction	#SplicedAlignments	SplicedAlignmentFraction	#Pairs	#MappedPairs	MappedPairsFraction	#MappedSameChr	MappedSameChrFraction	#MappedProperPair	MappedProperFraction	#ReferenceBp	#ReferenceNs	#AlignedBases	#MatchedBases	MatchRate	#MismatchedBases	MismatchRate	#DeletionsCigarD	DeletionRate	HomopolymerContextDel	#InsertionsCigarI	InsertionRate	HomopolymerContextIns	#SoftClippedCigarS	SoftClipRate	#HardClippedCigarH	HardClipRate	ErrorRate	MedianReadLength	DefaultLibraryLayout
MS82	sample 48	0	0	0	0	0	0	36333	1	36333	0	0	34035	0.936752	2298	0.0632483	2613	0.0719181	0	0	0	0	0	0	0	0	0	0	0	29903	0	3110954	3080739	0.990288	30215	0.00971245	347	0.000111541	0.253602	869	0.000279336	0.963176	35215	0.0113197	0	0	0.021423	130	0
MS82	sample 25	0	0	0	0	0	0	361289	1	361289	0	0	322241	0.89192	39048	0.10808	64467	0.178436	0	0	0	0	0	0	0	0	0	0	0	29903	0	34156077	33872411	0.991695	283666	0.00830499	3120	9.13454e-05	0.380449	8443	0.000247189	0.94528	295540	0.00865263	0	0	0.0172962	130	0
MS82	sample 26	0	0	0	0	0	0	113216	1	113216	0	0	101621	0.897585	11595	0.102415	15393	0.135961	0	0	0	0	0	0	0	0	0	0	0	29903	0	9936439	9837957	0.990089	98482	0.0099112	3334	0.000335533	0.365027	2294	0.000230867	0.947254	105556	0.0106231	0	0	0.0211007	130	0
MS82	Negative control 2	0	0	0	0	0	0	27524	1	27524	0	0	25174	0.91462	2350	0.08538	3035	0.110267	0	0	0	0	0	0	0	0	0	0	0	29903	0	2454038	2434621	0.992088	19417	0.00791227	338	0.000137732	0.251479	689	0.000280762	0.889695	26113	0.0106408	0	0	0.0189716	130	0
MS82	sample 10	0	0	0	0	0	0	830602	1	830602	0	0	743194	0.894765	87408	0.105235	150673	0.181402	0	0	0	0	0	0	0	0	0	0	0	29903	0	79152101	78513832	0.991936	638269	0.00806383	7468	9.435e-05	0.425415	21515	0.000271818	0.940878	756660	0.00955957	0	0	0.0179896	130	0
MS82	Positive control 2	0	0	0	0	0	0	558999	1	558999	0	0	505824	0.904875	53175	0.0951254	81126	0.145127	0	0	0	0	0	0	0	0	0	0	0	29903	0	53529354	53171855	0.993321	357499	0.00667856	12461	0.000232788	0.322607	15414	0.000287954	0.92935	464193	0.00867175	0	0	0.015871	130	0
MS82	sample 11	0	0	0	0	0	0	111009	1	111009	0	0	100421	0.90462	10588	0.0953797	8965	0.0807592	0	0	0	0	0	0	0	0	0	0	0	29903	0	10151201	10063521	0.991363	87680	0.0086374	1092	0.000107573	0.557692	2455	0.000241843	0.945825	93952	0.00925526	0	0	0.0182421	130	0
MS82	sample 29	0	0	0	0	0	0	68401	1	68401	0	0	61948	0.905659	6453	0.0943407	4819	0.0704522	0	0	0	0	0	0	0	0	0	0	0	29903	0	6174878	6121689	0.991386	53189	0.00861377	486	7.8706e-05	0.393004	1440	0.000233203	0.951389	61781	0.0100052	0	0	0.0189309	130	0
MS82	Negative control 1	0	0	0	0	0	0	21254	1	21254	0	0	19111	0.899172	2143	0.100828	2227	0.10478	0	0	0	0	0	0	0	0	0	0	0	29903	0	1918775	1900240	0.99034	18535	0.00965981	240	0.00012508	0.295833	588	0.000306446	0.904762	19643	0.0102373	0	0	0.0203286	130	0
MS82	sample 8	0	0	0	0	0	0	914986	1	914986	0	0	835428	0.91305	79558	0.08695	143232	0.15654	0	0	0	0	0	0	0	0	0	0	0	29903	0	87977846	87247218	0.991695	730628	0.00830468	7498	8.5226e-05	0.426914	21372	0.000242925	0.944834	769331	0.0087446	0	0	0.0173774	130	0
MS82	Positive control 1	0	0	0	0	0	0	668867	1	668867	0	0	610923	0.91337	57944	0.0866301	93977	0.140502	0	0	0	0	0	0	0	0	0	0	0	29903	0	65463115	65007031	0.993033	456084	0.00696704	14793	0.000225975	0.339079	19413	0.000296549	0.936486	539018	0.00823392	0	0	0.0157235	130	0
MS82	sample 9	0	0	0	0	0	0	955318	1	955318	0	0	863261	0.903637	92057	0.0963627	148742	0.155699	0	0	0	0	0	0	0	0	0	0	0	29903	0	94243459	93480049	0.9919	763410	0.0081004	9007	9.55716e-05	0.441212	23663	0.000251084	0.942273	775165	0.00822513	0	0	0.0166722	130	0
MS82	sample 39	0	0	0	0	0	0	430539	1	430539	0	0	389041	0.903614	41498	0.0963862	84148	0.195448	0	0	0	0	0	0	0	0	0	0	0	29903	0	40169268	39875587	0.992689	293681	0.00731109	3757	9.35292e-05	0.404844	10889	0.000271078	0.94095	365007	0.00908672	0	0	0.0167624	130	0
MS82	sample 40	0	0	0	0	0	0	413686	1	413686	0	0	362113	0.875333	51573	0.124667	127057	0.307134	0	0	0	0	0	0	0	0	0	0	0	29903	0	34483044	34193684	0.991609	289360	0.00839137	3543	0.000102746	0.403613	9499	0.000275469	0.931888	406787	0.0117967	0	0	0.0205663	130	0
MS82	sample 18	0	0	0	0	0	0	55890	1	55890	0	0	50363	0.901109	5527	0.0988907	4593	0.0821793	0	0	0	0	0	0	0	0	0	0	0	29903	0	4632841	4590825	0.990931	42016	0.00906917	618	0.000133395	0.509709	2052	0.000442925	0.974172	55721	0.0120274	0	0	0.0216729	130	0
MS82	sample 19	0	0	0	0	0	0	1188681	1	1188681	0	0	1071135	0.901112	117546	0.0988878	229457	0.193035	0	0	0	0	0	0	0	0	0	0	0	29903	0	110556642	109497634	0.990421	1059008	0.00957887	9752	8.82082e-05	0.432834	27633	0.000249944	0.937683	1104962	0.00999453	0	0	0.0199116	130	0
MS82	sample 24	0	0	0	0	0	0	45483	1	45483	0	0	41977	0.922916	3506	0.0770837	3963	0.0871315	0	0	0	0	0	0	0	0	0	0	0	29903	0	3963626	3931386	0.991866	32240	0.00813397	351	8.85553e-05	0.378917	1582	0.000399129	0.960177	41335	0.0104286	0	0	0.0190502	130	0
MS82	sample 34	0	0	0	0	0	0	563469	1	563469	0	0	522711	0.927666	40758	0.0723341	62098	0.110207	0	0	0	0	0	0	0	0	0	0	0	29903	0	56167236	55837754	0.994134	329482	0.00586609	5356	9.53581e-05	0.476102	12988	0.000231238	0.946412	414172	0.00737391	0	0	0.0135666	130	0
MS82	sample 35	0	0	0	0	0	0	44600	1	44600	0	0	41713	0.935269	2887	0.0647309	3619	0.0811435	0	0	0	0	0	0	0	0	0	0	0	29903	0	4040561	4011909	0.992909	28652	0.00709109	398	9.85012e-05	0.309045	1010	0.000249965	0.949505	40810	0.0101001	0	0	0.0175396	130	0
MS82	sample 49	0	0	0	0	0	0	345200	1	345200	0	0	309766	0.897352	35434	0.102648	77997	0.225947	0	0	0	0	0	0	0	0	0	0	0	29903	0	29848225	29616757	0.992245	231468	0.00775483	3661	0.000122654	0.33734	7857	0.000263232	0.927199	320882	0.0107505	0	0	0.0188912	130	0
MS82	sample 1	0	0	0	0	0	0	25129	1	25129	0	0	22932	0.912571	2197	0.0874289	2984	0.118747	0	0	0	0	0	0	0	0	0	0	0	29903	0	2289397	2271396	0.992137	18001	0.00786277	282	0.000123177	0.549645	513	0.000224076	0.937622	22897	0.0100013	0	0	0.0182113	130	0
MS82	sample 50	0	0	0	0	0	0	871649	1	871649	0	0	793633	0.910496	78016	0.0895039	122928	0.141029	0	0	0	0	0	0	0	0	0	0	0	29903	0	84772888	84171971	0.992911	600917	0.00708855	6953	8.20191e-05	0.431325	19411	0.000228977	0.94024	723477	0.0085343	0	0	0.0159338	130	0
MS82	sample 2	0	0	0	0	0	0	378972	1	378972	0	0	335108	0.884255	43864	0.115745	106205	0.280245	0	0	0	0	0	0	0	0	0	0	0	29903	0	31735475	31463596	0.991433	271879	0.00856704	3769	0.000118763	0.337755	8681	0.000273542	0.931575	389305	0.0122672	0	0	0.0212265	130	0
MS82	sample 42	0	0	0	0	0	0	42514	1	42514	0	0	38505	0.905702	4009	0.0942983	3734	0.0878299	0	0	0	0	0	0	0	0	0	0	0	29903	0	3723847	3690847	0.991138	33000	0.0088618	335	8.99607e-05	0.450746	1470	0.000394753	0.964626	39136	0.0105096	0	0	0.0198561	130	0
MS82	sample 43	0	0	0	0	0	0	685407	1	685407	0	0	627485	0.915493	57922	0.0845075	78153	0.114024	0	0	0	0	0	0	0	0	0	0	0	29903	0	68373685	67857745	0.992454	515940	0.00754589	5431	7.94311e-05	0.459952	17860	0.000261212	0.934323	515684	0.00754214	0	0	0.0154287	130	0
MS82	sample 15	0	0	0	0	0	0	442345	1	442345	0	0	404439	0.914307	37906	0.0856933	55486	0.125436	0	0	0	0	0	0	0	0	0	0	0	29903	0	42729428	42317722	0.990365	411706	0.00963519	3550	8.30809e-05	0.41662	9503	0.000222399	0.941387	351619	0.00822897	0	0	0.0181696	130	0
MS82	sample 16	0	0	0	0	0	0	902391	1	902391	0	0	803098	0.889967	99293	0.110033	172795	0.191486	0	0	0	0	0	0	0	0	0	0	0	29903	0	84163177	83381001	0.990706	782176	0.00929357	8973	0.000106614	0.353394	21109	0.00025081	0.93633	844596	0.0100352	0	0	0.0196862	130	0
MS82	sample 52	0	0	0	0	0	0	1082453	1	1082453	0	0	967831	0.894109	114622	0.105891	185996	0.171828	0	0	0	0	0	0	0	0	0	0	0	29903	0	104255852	103334266	0.99116	921586	0.00883966	9570	9.17934e-05	0.452247	26731	0.000256398	0.938162	932341	0.00894282	0	0	0.0181307	130	0
MS82	sample 53	0	0	0	0	0	0	702463	1	702463	0	0	631973	0.899653	70490	0.100347	100692	0.143341	0	0	0	0	0	0	0	0	0	0	0	29903	0	68279410	67749181	0.992234	530229	0.00776558	6511	9.53582e-05	0.436031	17148	0.000251145	0.928155	568173	0.00832129	0	0	0.0164334	130	0
MS82	sample 5	0	0	0	0	0	0	291121	1	291121	0	0	265944	0.913517	25177	0.0864829	38694	0.132914	0	0	0	0	0	0	0	0	0	0	0	29903	0	27106990	26924926	0.993284	182064	0.0067165	1968	7.26012e-05	0.411077	5596	0.000206441	0.941923	242860	0.00895931	0	0	0.0159549	130	0
MS82	sample 32	0	0	0	0	0	0	58290	1	58290	0	0	55650	0.954709	2640	0.0452908	4042	0.0693429	0	0	0	0	0	0	0	0	0	0	0	29903	0	5092343	5069862	0.995585	22481	0.00441467	559	0.000109773	0.359571	1640	0.000322052	0.962805	56245	0.011045	0	0	0.0158915	130	0
MS82	sample 33	0	0	0	0	0	0	72568	1	72568	0	0	68039	0.93759	4529	0.0624104	5746	0.0791809	0	0	0	0	0	0	0	0	0	0	0	29903	0	6378815	6326992	0.991876	51823	0.00812424	1475	0.000231234	0.148475	1559	0.000244403	0.956382	68826	0.0107898	0	0	0.0193897	130	0
MS82	sample 54	0	0	0	0	0	0	346431	1	346431	0	0	309116	0.892287	37315	0.107713	63975	0.184669	0	0	0	0	0	0	0	0	0	0	0	29903	0	31165299	30887148	0.991075	278151	0.00892502	2429	7.79392e-05	0.475916	7261	0.000232983	0.92742	308725	0.00990605	0	0	0.019142	130	0
MS82	sample 6	0	0	0	0	0	0	588045	1	588045	0	0	533731	0.907636	54314	0.0923637	71911	0.122288	0	0	0	0	0	0	0	0	0	0	0	29903	0	58156683	57758505	0.993153	398178	0.00684664	7346	0.000126314	0.343724	13780	0.000236946	0.949637	432411	0.00743528	0	0	0.0146452	130	0
MS82	sample 55	0	0	0	0	0	0	667370	1	667370	0	0	603570	0.904401	63800	0.0955991	104523	0.156619	0	0	0	0	0	0	0	0	0	0	0	29903	0	64842042	64325930	0.99204	516112	0.00795953	8455	0.000130394	0.303962	16290	0.000251226	0.941252	547651	0.00844592	0	0	0.0167871	130	0
MS82	sample 7	0	0	0	0	0	0	1030979	1	1030979	0	0	923593	0.895841	107386	0.104159	195908	0.190021	0	0	0	0	0	0	0	0	0	0	0	29903	0	96744107	95870438	0.990969	873669	0.00903072	9346	9.66054e-05	0.451744	26145	0.000270249	0.936776	964570	0.00997032	0	0	0.0193679	130	0
MS82	sample 27	0	0	0	0	0	0	740377	1	740377	0	0	667088	0.901011	73289	0.0989888	114836	0.155105	0	0	0	0	0	0	0	0	0	0	0	29903	0	72278430	71691251	0.991876	587179	0.00812385	6864	9.49661e-05	0.48951	16964	0.000234703	0.936748	598363	0.00827858	0	0	0.0167321	130	0
MS82	sample 28	0	0	0	0	0	0	124138	1	124138	0	0	116026	0.934653	8112	0.0653466	8747	0.0704619	0	0	0	0	0	0	0	0	0	0	0	29903	0	11396731	11329338	0.994087	67393	0.00591336	993	8.71302e-05	0.356495	2668	0.000234102	0.946777	109277	0.00958845	0	0	0.015823	130	0
MS82	sample 44	0	0	0	0	0	0	50011	1	50011	0	0	46690	0.933595	3321	0.0664054	3932	0.0786227	0	0	0	0	0	0	0	0	0	0	0	29903	0	4198323	4171672	0.993652	26651	0.00634801	924	0.000220088	0.142857	1536	0.00036586	0.959635	49330	0.0117499	0	0	0.0186839	130	0
MS82	sample 45	0	0	0	0	0	0	888454	1	888454	0	0	814401	0.91665	74053	0.0833504	112454	0.126573	0	0	0	0	0	0	0	0	0	0	0	29903	0	88197485	87519896	0.992317	677589	0.00768263	7756	8.7939e-05	0.464673	20657	0.000234213	0.94002	683744	0.00775242	0	0	0.0157572	130	0
MS82	sample 17	0	0	0	0	0	0	675857	1	675857	0	0	604077	0.893794	71780	0.106206	120458	0.17823	0	0	0	0	0	0	0	0	0	0	0	29903	0	65411674	64862198	0.9916	549476	0.00840027	5589	8.54435e-05	0.446055	16439	0.000251316	0.939777	576251	0.0088096	0	0	0.0175466	130	0
MS82	sample 46	0	0	0	0	0	0	66809	1	66809	0	0	61515	0.920759	5294	0.0792408	5750	0.0860662	0	0	0	0	0	0	0	0	0	0	0	29903	0	5836874	5794470	0.992735	42404	0.00726485	679	0.000116329	0.281296	1285	0.000220152	0.920623	62003	0.0106226	0	0	0.018224	130	0
MS82	sample 47	0	0	0	0	0	0	727979	1	727979	0	0	653450	0.897622	74529	0.102378	141194	0.193953	0	0	0	0	0	0	0	0	0	0	0	29903	0	67716720	67101964	0.990922	614756	0.00907835	6524	9.63425e-05	0.417995	18196	0.000268708	0.935206	682296	0.0100757	0	0	0.0195191	130	0
MS82	sample 13	0	0	0	0	0	0	637777	1	637777	0	0	581988	0.912526	55789	0.0874741	125698	0.197088	0	0	0	0	0	0	0	0	0	0	0	29903	0	56864312	56213302	0.988552	651010	0.0114485	5581	9.81459e-05	0.399032	14351	0.000252373	0.938611	627734	0.0110392	0	0	0.0228382	130	0
MS82	sample 14	0	0	0	0	0	0	415198	1	415198	0	0	381179	0.918066	34019	0.0819344	88514	0.213185	0	0	0	0	0	0	0	0	0	0	0	29903	0	36761874	36488581	0.992566	273293	0.00743414	4122	0.000112127	0.432072	9161	0.000249198	0.93898	380882	0.0103608	0	0	0.0181563	130	0
MS82	sample 36	0	0	0	0	0	0	689990	1	689990	0	0	617077	0.894327	72913	0.105673	117551	0.170366	0	0	0	0	0	0	0	0	0	0	0	29903	0	66149769	65619726	0.991987	530043	0.00801277	6645	0.000100454	0.422573	17186	0.000259804	0.941639	605790	0.00915786	0	0	0.0175309	130	0
MS82	sample 20	0	0	0	0	0	0	686029	1	686029	0	0	628591	0.916275	57438	0.0837253	99763	0.145421	0	0	0	0	0	0	0	0	0	0	0	29903	0	66517653	66069663	0.993265	447990	0.0067349	7079	0.000106423	0.415454	15155	0.000227834	0.940284	546155	0.00821068	0	0	0.0152798	130	0
MS82	sample 21	0	0	0	0	0	0	53711	1	53711	0	0	50203	0.934687	3508	0.0653125	4245	0.0790341	0	0	0	0	0	0	0	0	0	0	0	29903	0	4729195	4692910	0.992327	36285	0.00767255	734	0.000155206	0.377384	1120	0.000236827	0.965179	50082	0.01059	0	0	0.0186545	130	0
MS82	sample 41	0	0	0	0	0	0	741502	1	741502	0	0	656272	0.885058	85230	0.114942	126871	0.1711	0	0	0	0	0	0	0	0	0	0	0	29903	0	71710809	71037246	0.990607	673563	0.00939277	7743	0.000107975	0.380602	18370	0.000256168	0.946979	638422	0.00890273	0	0	0.0186596	130	0
MS82	sample 3	0	0	0	0	0	0	413951	1	413951	0	0	372492	0.899846	41459	0.100154	93662	0.226263	0	0	0	0	0	0	0	0	0	0	0	29903	0	36904659	36629690	0.992549	274969	0.00745079	4402	0.00011928	0.352794	10799	0.000292619	0.928327	391149	0.0105989	0	0	0.0184616	130	0
MS82	sample 4	0	0	0	0	0	0	113993	1	113993	0	0	103272	0.90595	10721	0.0940496	15862	0.139149	0	0	0	0	0	0	0	0	0	0	0	29903	0	9370034	9297556	0.992265	72478	0.00773508	2679	0.000285911	0.350131	2321	0.000247705	0.94399	112400	0.0119957	0	0	0.0202644	130	0
MS82	sample 51	0	0	0	0	0	0	895051	1	895051	0	0	803720	0.89796	91331	0.10204	133743	0.149425	0	0	0	0	0	0	0	0	0	0	0	29903	0	88778138	88083139	0.992172	694999	0.00782849	10200	0.000114893	0.421569	21234	0.000239181	0.944052	706019	0.00795262	0	0	0.0161352	130	0
MS82	sample 30	0	0	0	0	0	0	56323	1	56323	0	0	50043	0.8885	6280	0.1115	5574	0.0989649	0	0	0	0	0	0	0	0	0	0	0	29903	0	4983751	4936398	0.990499	47353	0.00950148	934	0.000187409	0.27409	1509	0.000302784	0.945659	51941	0.0104221	0	0	0.0204137	130	0
MS82	sample 31	0	0	0	0	0	0	1190426	1	1190426	0	0	1079496	0.906815	110930	0.0931851	200299	0.168258	0	0	0	0	0	0	0	0	0	0	0	29903	0	114568455	113673568	0.992189	894887	0.00781094	12258	0.000106993	0.420786	27767	0.000242362	0.936003	1032278	0.00901014	0	0	0.0171704	130	0
MS82	sample 37	0	0	0	0	0	0	11755	1	11755	0	0	10677	0.908294	1078	0.0917057	2076	0.176606	0	0	0	0	0	0	0	0	0	0	0	29903	0	1065075	1057120	0.992531	7955	0.00746896	139	0.000130507	0.410072	269	0.000252564	0.933086	11394	0.0106978	0	0	0.0185499	130	0
MS82	sample 38	0	0	0	0	0	0	682405	1	682405	0	0	609958	0.893836	72447	0.106164	125668	0.184155	0	0	0	0	0	0	0	0	0	0	0	29903	0	64936545	64388782	0.991565	547763	0.00843536	7207	0.000110985	0.379492	16915	0.000260485	0.938398	616833	0.00949901	0	0	0.0183058	130	0
MS82	sample 22	0	0	0	0	0	0	43694	1	43694	0	0	39480	0.903557	4214	0.0964434	3576	0.0818419	0	0	0	0	0	0	0	0	0	0	0	29903	0	3793584	3762856	0.9919	30728	0.00809999	332	8.75162e-05	0.481928	1034	0.000272565	0.941973	41752	0.011006	0	0	0.019466	130	0
MS82	sample 23	0	0	0	0	0	0	36542	1	36542	0	0	29830	0.816321	6712	0.183679	3219	0.0880904	0	0	0	0	0	0	0	0	0	0	0	29903	0	3353916	3308163	0.986358	45753	0.0136417	363	0.000108232	0.333333	923	0.000275201	0.947996	32817	0.00978468	0	0	0.0238098	130	0
MS82	Negative control 3	0	0	0	0	0	0	25477	1	25477	0	0	22729	0.892138	2748	0.107862	2389	0.0937709	0	0	0	0	0	0	0	0	0	0	0	29903	0	2288182	2264243	0.989538	23939	0.010462	318	0.000138975	0.27044	705	0.000308105	0.906383	23911	0.0104498	0	0	0.0213589	130	0
MS82	sample 12	0	0	0	0	0	0	940728	1	940728	0	0	842129	0.895189	98599	0.104811	159992	0.170073	0	0	0	0	0	0	0	0	0	0	0	29903	0	89936053	89229837	0.992148	706216	0.00785242	8246	9.16874e-05	0.442518	22471	0.000249855	0.938543	818475	0.00910063	0	0	0.0172946	130	0
[truncated: 8 more columns]

## Sheet: COVseq samples 31-55 (Rep2)
Supplementary Table 2. Summary of sequencing results
Library	Sample	#QCFail	QCFailFraction	#DuplicateMarked	DuplicateFraction	#Unmapped	UnmappedFraction	#Mapped	MappedFraction	#MappedRead1	#MappedRead2	RatioMapped2vsMapped1	#MappedForward	MappedForwardFraction	#MappedReverse	MappedReverseFraction	#SecondaryAlignments	SecondaryAlignmentFraction	#SupplementaryAlignments	SupplementaryAlignmentFraction	#SplicedAlignments	SplicedAlignmentFraction	#Pairs	#MappedPairs	MappedPairsFraction	#MappedSameChr	MappedSameChrFraction	#MappedProperPair	MappedProperFraction	#ReferenceBp	#ReferenceNs	#AlignedBases	#MatchedBases	MatchRate	#MismatchedBases	MismatchRate	#DeletionsCigarD	DeletionRate	HomopolymerContextDel	#InsertionsCigarI	InsertionRate	HomopolymerContextIns	#SoftClippedCigarS	SoftClipRate	#HardClippedCigarH	HardClipRate	ErrorRate	MedianReadLength	DefaultLibraryLayout
MS83	sample 48	0	0	0	0	0	0	57321	1	57321	0	0	53505	0.933428	3816	0.0665725	4757	0.0829888	0	0	0	0	0	0	0	0	0	0	0	29903	0	4894317	4844911	0.989905	49406	0.0100946	598	0.000122183	0.234114	1346	0.000275013	0.947251	55665	0.0113734	0	0	0.0218652	130	0
MS83	sample 25	0	0	0	0	0	0	641168	1	641168	0	0	586649	0.914969	54519	0.0850308	69381	0.10821	0	0	0	0	0	0	0	0	0	0	0	29903	0	64753823	64288920	0.99282	464903	0.00717955	5378	8.3053e-05	0.364262	14821	0.000228882	0.945618	455939	0.00704111	0	0	0.0145326	130	0
MS83	sample 26	0	0	0	0	0	0	179168	1	179168	0	0	160320	0.894803	18848	0.105197	24324	0.135761	0	0	0	0	0	0	0	0	0	0	0	29903	0	15804306	15651124	0.990308	153182	0.00969242	4340	0.000274609	0.351382	3713	0.000234936	0.927552	165137	0.0104489	0	0	0.0206508	130	0
MS83	Negative control 2	0	0	0	0	0	0	41223	1	41223	0	0	37762	0.916042	3461	0.083958	5421	0.131504	0	0	0	0	0	0	0	0	0	0	0	29903	0	3733276	3706493	0.992826	26783	0.00717413	503	0.000134734	0.256461	1066	0.00028554	0.905253	38358	0.0102746	0	0	0.017869	130	0
MS83	sample 10	0	0	0	0	0	0	789216	1	789216	0	0	701957	0.889436	87259	0.110564	165686	0.209937	0	0	0	0	0	0	0	0	0	0	0	29903	0	73264323	72673661	0.991938	590662	0.00806207	7259	9.90796e-05	0.426781	20444	0.000279044	0.940325	744385	0.0101603	0	0	0.0186005	130	0
MS83	Positive control 2	0	0	0	0	0	0	634499	1	634499	0	0	574287	0.905103	60212	0.0948969	91748	0.144599	0	0	0	0	0	0	0	0	0	0	0	29903	0	60544366	60133486	0.993214	410880	0.00678643	14264	0.000235596	0.318845	17993	0.000297187	0.920413	530999	0.00877041	0	0	0.0160896	130	0
MS83	sample 11	0	0	0	0	0	0	144785	1	144785	0	0	131381	0.907421	13404	0.0925787	13607	0.0939807	0	0	0	0	0	0	0	0	0	0	0	29903	0	13333472	13228902	0.992157	104570	0.00784267	1378	0.000103349	0.500726	3257	0.000244272	0.933374	123605	0.00927028	0	0	0.0174606	130	0
MS83	sample 29	0	0	0	0	0	0	105746	1	105746	0	0	93867	0.887665	11879	0.112335	8553	0.0808825	0	0	0	0	0	0	0	0	0	0	0	29903	0	9716467	9625983	0.990688	90484	0.00931244	920	9.46846e-05	0.366304	2409	0.00024793	0.942715	93928	0.00966689	0	0	0.0193219	131	0
MS83	Negative control 1	0	0	0	0	0	0	37236	1	37236	0	0	33981	0.912585	3255	0.0874154	4409	0.118407	0	0	0	0	0	0	0	0	0	0	0	29903	0	3383032	3356049	0.992024	26983	0.00797598	452	0.000133608	0.25885	962	0.00028436	0.913721	34417	0.0101734	0	0	0.0185674	130	0
MS83	sample 8	0	0	0	0	0	0	1129821	1	1129821	0	0	1028160	0.91002	101661	0.0899797	181680	0.160804	0	0	0	0	0	0	0	0	0	0	0	29903	0	108029821	107092814	0.991326	937007	0.0086736	9312	8.61984e-05	0.434064	25892	0.000239675	0.94311	959057	0.00887771	0	0	0.0178772	130	0
MS83	Positive control 1	0	0	0	0	0	0	605913	1	605913	0	0	547140	0.903001	58773	0.0969991	101787	0.167989	0	0	0	0	0	0	0	0	0	0	0	29903	0	57820918	57392426	0.992589	428492	0.00741067	13591	0.000235053	0.326319	17311	0.00029939	0.928658	500218	0.00865116	0	0	0.0165963	130	0
MS83	sample 9	0	0	0	0	0	0	826363	1	826363	0	0	739880	0.895345	86483	0.104655	192850	0.233372	0	0	0	0	0	0	0	0	0	0	0	29903	0	75814649	75236489	0.992374	578160	0.00762597	7370	9.72108e-05	0.42171	19697	0.000259805	0.937402	720332	0.00950122	0	0	0.0174842	130	0
MS83	sample 39	0	0	0	0	0	0	420183	1	420183	0	0	358755	0.853807	61428	0.146193	150232	0.357539	0	0	0	0	0	0	0	0	0	0	0	29903	0	34478342	34147202	0.990396	331140	0.00960429	3260	9.45521e-05	0.427914	8909	0.000258394	0.922326	448432	0.0130062	0	0	0.0229634	130	0
MS83	sample 40	0	0	0	0	0	0	815994	1	815994	0	0	723547	0.886706	92447	0.113294	184121	0.22564	0	0	0	0	0	0	0	0	0	0	0	29903	0	74978280	74329534	0.991348	648746	0.00865245	7570	0.000100963	0.438177	19919	0.000265664	0.936242	790315	0.0105406	0	0	0.0195597	130	0
MS83	sample 18	0	0	0	0	0	0	73977	1	73977	0	0	68372	0.924233	5605	0.0757668	7717	0.104316	0	0	0	0	0	0	0	0	0	0	0	29903	0	6197122	6152360	0.992777	44762	0.00722303	744	0.000120056	0.510753	2633	0.000424875	0.971136	74548	0.0120295	0	0	0.0197974	130	0
MS83	sample 19	0	0	0	0	0	0	1358730	1	1358730	0	0	1216938	0.895644	141792	0.104356	273928	0.201606	0	0	0	0	0	0	0	0	0	0	0	29903	0	125847572	124569815	0.989847	1277757	0.0101532	11036	8.76934e-05	0.438837	31590	0.000251018	0.939506	1248709	0.00992239	0	0	0.0204143	130	0
MS83	sample 24	0	0	0	0	0	0	61853	1	61853	0	0	56596	0.915008	5257	0.0849918	6217	0.100513	0	0	0	0	0	0	0	0	0	0	0	29903	0	5398396	5355568	0.992067	42828	0.00793347	431	7.98385e-05	0.399072	1953	0.000361774	0.959037	57285	0.0106115	0	0	0.0189866	130	0
MS83	sample 34	0	0	0	0	0	0	365807	1	365807	0	0	337424	0.92241	28383	0.0775901	46158	0.126181	0	0	0	0	0	0	0	0	0	0	0	29903	0	35482331	35266317	0.993912	216014	0.00608793	3459	9.74851e-05	0.47904	8242	0.000232285	0.943582	284058	0.00800562	0	0	0.0144233	130	0
MS83	sample 35	0	0	0	0	0	0	47787	1	47787	0	0	44373	0.928558	3414	0.071442	4409	0.0922636	0	0	0	0	0	0	0	0	0	0	0	29903	0	4298920	4267286	0.992641	31634	0.00735859	450	0.000104677	0.32	1063	0.000247271	0.936971	44692	0.0103961	0	0	0.0181066	130	0
MS83	sample 49	0	0	0	0	0	0	996050	1	996050	0	0	906353	0.909947	89697	0.0900527	124774	0.125269	0	0	0	0	0	0	0	0	0	0	0	29903	0	99117704	98376369	0.992521	741335	0.00747934	11123	0.00011222	0.356558	24019	0.000242328	0.939423	765264	0.00772076	0	0	0.0155546	130	0
MS83	sample 1	0	0	0	0	0	0	177184	1	177184	0	0	161624	0.912182	15560	0.0878183	17951	0.101313	0	0	0	0	0	0	0	0	0	0	0	29903	0	16396572	16268234	0.992173	128338	0.00782712	2090	0.000127466	0.501435	3619	0.000220717	0.934789	155399	0.00947753	0	0	0.0176528	131	0
MS83	sample 50	0	0	0	0	0	0	664772	1	664772	0	0	573510	0.862717	91262	0.137283	195542	0.294149	0	0	0	0	0	0	0	0	0	0	0	29903	0	56912076	56388162	0.990794	523914	0.00920567	4747	8.34094e-05	0.435222	13793	0.000242356	0.926629	695187	0.0122151	0	0	0.0217465	130	0
MS83	sample 2	0	0	0	0	0	0	927063	1	927063	0	0	820350	0.884891	106713	0.115109	176114	0.18997	0	0	0	0	0	0	0	0	0	0	0	29903	0	88649388	87835482	0.990819	813906	0.00918118	10024	0.000113075	0.375	22443	0.000253166	0.940962	804478	0.00907483	0	0	0.0186222	130	0
MS83	sample 42	0	0	0	0	0	0	63741	1	63741	0	0	58387	0.916004	5354	0.0839962	7777	0.122009	0	0	0	0	0	0	0	0	0	0	0	29903	0	5616249	5573847	0.99245	42402	0.00754988	538	9.57935e-05	0.408922	1905	0.000339194	0.95748	58897	0.0104869	0	0	0.0184718	130	0
MS83	sample 43	0	0	0	0	0	0	601598	1	601598	0	0	532034	0.884368	69564	0.115632	138616	0.230413	0	0	0	0	0	0	0	0	0	0	0	29903	0	54308578	53817347	0.990955	491231	0.00904518	4513	8.30992e-05	0.42012	13434	0.000247364	0.929656	558714	0.0102878	0	0	0.0196634	130	0
MS83	sample 15	0	0	0	0	0	0	593623	1	593623	0	0	542104	0.913213	51519	0.0867874	78963	0.133019	0	0	0	0	0	0	0	0	0	0	0	29903	0	56918204	56379185	0.99053	539019	0.00947006	4773	8.38572e-05	0.39472	12995	0.00022831	0.937207	475302	0.00835061	0	0	0.0181328	130	0
MS83	sample 16	0	0	0	0	0	0	742782	1	742782	0	0	659605	0.88802	83177	0.11198	145695	0.196148	0	0	0	0	0	0	0	0	0	0	0	29903	0	68720772	68076952	0.990631	643820	0.00936864	8025	0.000116777	0.342181	17555	0.000255454	0.933124	694012	0.010099	0	0	0.0198399	130	0
MS83	sample 52	0	0	0	0	0	0	1331222	1	1331222	0	0	1185932	0.89086	145290	0.10914	243135	0.18264	0	0	0	0	0	0	0	0	0	0	0	29903	0	126787190	125659322	0.991104	1127868	0.00889576	11997	9.46231e-05	0.431358	33653	0.000265429	0.937985	1177036	0.00928356	0	0	0.0185394	130	0
MS83	sample 53	0	0	0	0	0	0	662419	1	662419	0	0	591479	0.892908	70940	0.107092	130392	0.196842	0	0	0	0	0	0	0	0	0	0	0	29903	0	60248033	59778804	0.992212	469229	0.00778829	6255	0.000103821	0.404796	16305	0.000270631	0.929715	572858	0.00950833	0	0	0.0176711	130	0
MS83	sample 5	0	0	0	0	0	0	491040	1	491040	0	0	447953	0.912254	43087	0.0877464	70051	0.142658	0	0	0	0	0	0	0	0	0	0	0	29903	0	45270209	44964634	0.99325	305575	0.00675002	3353	7.40664e-05	0.416642	9903	0.000218753	0.93709	418622	0.00924719	0	0	0.01629	130	0
MS83	sample 32	0	0	0	0	0	0	74598	1	74598	0	0	70573	0.946044	4025	0.0539559	7137	0.0956728	0	0	0	0	0	0	0	0	0	0	0	29903	0	6246778	6216334	0.995126	30444	0.00487355	757	0.000121182	0.347424	2039	0.000326408	0.960765	75025	0.0120102	0	0	0.0173313	130	0
MS83	sample 33	0	0	0	0	0	0	116791	1	116791	0	0	109099	0.934139	7692	0.0658612	10445	0.0894333	0	0	0	0	0	0	0	0	0	0	0	29903	0	10209253	10123563	0.991607	85690	0.00839337	2204	0.000215883	0.161978	2501	0.000244974	0.954018	112570	0.0110263	0	0	0.0198805	130	0
MS83	sample 54	0	0	0	0	0	0	458005	1	458005	0	0	407819	0.890425	50186	0.109575	87440	0.190915	0	0	0	0	0	0	0	0	0	0	0	29903	0	40800640	40436086	0.991065	364554	0.00893501	3162	7.74988e-05	0.466161	9500	0.000232839	0.930526	417159	0.0102243	0	0	0.0194697	130	0
MS83	sample 6	0	0	0	0	0	0	1109274	1	1109274	0	0	1009233	0.909814	100041	0.090186	142882	0.128807	0	0	0	0	0	0	0	0	0	0	0	29903	0	109605779	108877649	0.993357	728130	0.00664317	13440	0.000122621	0.346429	25744	0.000234878	0.948104	823031	0.00750901	0	0	0.0145097	130	0
MS83	sample 55	0	0	0	0	0	0	553009	1	553009	0	0	500197	0.904501	52812	0.0954993	121013	0.218826	0	0	0	0	0	0	0	0	0	0	0	29903	0	48858094	48525950	0.993202	332144	0.00679814	8035	0.000164456	0.257996	14609	0.000299009	0.934561	484980	0.0099263	0	0	0.0171879	130	0
MS83	sample 7	0	0	0	0	0	0	1349628	1	1349628	0	0	1204533	0.892493	145095	0.107507	258203	0.191314	0	0	0	0	0	0	0	0	0	0	0	29903	0	127157516	125970312	0.990664	1187204	0.00933648	11864	9.33016e-05	0.444622	34006	0.000267432	0.936688	1238895	0.00974299	0	0	0.0194402	130	0
MS83	sample 27	0	0	0	0	0	0	808748	1	808748	0	0	727321	0.899317	81427	0.100683	129747	0.160429	0	0	0	0	0	0	0	0	0	0	0	29903	0	78150014	77513844	0.99186	636170	0.00814037	7639	9.77479e-05	0.485273	18580	0.000237748	0.940043	675541	0.00864416	0	0	0.01712	130	0
MS83	sample 28	0	0	0	0	0	0	137976	1	137976	0	0	125686	0.910927	12290	0.0890735	11461	0.0830652	0	0	0	0	0	0	0	0	0	0	0	29903	0	12406945	12317633	0.992801	89312	0.00719855	1278	0.000103007	0.338811	2778	0.000223907	0.937365	127207	0.0102529	0	0	0.0177783	130	0
MS83	sample 44	0	0	0	0	0	0	54451	1	54451	0	0	49638	0.911609	4813	0.0883914	7177	0.131807	0	0	0	0	0	0	0	0	0	0	0	29903	0	4889376	4852986	0.992557	36390	0.00744267	743	0.000151962	0.282638	1425	0.000291448	0.945965	50092	0.0102451	0	0	0.0181311	130	0
MS83	sample 45	0	0	0	0	0	0	960056	1	960056	0	0	877085	0.913577	82971	0.0864231	134373	0.139964	0	0	0	0	0	0	0	0	0	0	0	29903	0	94238437	93501582	0.992181	736855	0.00781905	8303	8.81063e-05	0.449235	22286	0.000236485	0.942744	758891	0.00805288	0	0	0.0161965	130	0
MS83	sample 17	0	0	0	0	0	0	712063	1	712063	0	0	633738	0.890003	78325	0.109997	142679	0.200374	0	0	0	0	0	0	0	0	0	0	0	29903	0	67556883	66988752	0.99159	568131	0.00840967	6026	8.91989e-05	0.444408	17429	0.00025799	0.938895	630544	0.00933353	0	0	0.0180904	130	0
MS83	sample 46	0	0	0	0	0	0	106155	1	106155	0	0	96102	0.905299	10053	0.0947011	9709	0.0914606	0	0	0	0	0	0	0	0	0	0	0	29903	0	9328256	9252336	0.991861	75920	0.00813871	1584	0.000169807	0.210227	2229	0.000238951	0.935397	97541	0.0104565	0	0	0.019004	130	0
MS83	sample 47	0	0	0	0	0	0	988789	1	988789	0	0	882241	0.892244	106548	0.107756	204461	0.206779	0	0	0	0	0	0	0	0	0	0	0	29903	0	90953859	90099413	0.990606	854446	0.00939428	8694	9.55869e-05	0.41983	24490	0.000269257	0.938301	950392	0.0104492	0	0	0.0202083	130	0
MS83	sample 13	0	0	0	0	0	0	723512	1	723512	0	0	654320	0.904366	69192	0.0956335	163824	0.226429	0	0	0	0	0	0	0	0	0	0	0	29903	0	63190305	62447187	0.98824	743118	0.01176	6366	0.000100743	0.422086	16035	0.000253757	0.937262	731518	0.0115764	0	0	0.0236909	130	0
MS83	sample 14	0	0	0	0	0	0	1057212	1	1057212	0	0	967836	0.915461	89376	0.0845393	155029	0.146639	0	0	0	0	0	0	0	0	0	0	0	29903	0	102745014	101892761	0.991705	852253	0.00829484	12273	0.000119451	0.469241	24015	0.000233734	0.936914	838715	0.00816307	0	0	0.0168111	130	0
MS83	sample 36	0	0	0	0	0	0	903897	1	903897	0	0	806051	0.891751	97846	0.108249	163922	0.18135	0	0	0	0	0	0	0	0	0	0	0	29903	0	85706279	85002572	0.991789	703707	0.00821068	8874	0.00010354	0.422583	22164	0.000258604	0.93909	802903	0.00936808	0	0	0.0179409	130	0
MS83	sample 20	0	0	0	0	0	0	1115319	1	1115319	0	0	1023064	0.917284	92255	0.0827162	151703	0.136018	0	0	0	0	0	0	0	0	0	0	0	29903	0	109553551	108837197	0.993461	716354	0.00653885	11991	0.000109453	0.401468	25537	0.000233101	0.940283	874182	0.00797949	0	0	0.0148609	130	0
MS83	sample 21	0	0	0	0	0	0	68782	1	68782	0	0	63863	0.928484	4919	0.0715158	6762	0.0983106	0	0	0	0	0	0	0	0	0	0	0	29903	0	6053621	6004962	0.991962	48659	0.008038	909	0.000150158	0.331133	1538	0.000254063	0.949935	65215	0.0107729	0	0	0.0192151	130	0
MS83	sample 41	0	0	0	0	0	0	1199562	1	1199562	0	0	1059629	0.883347	139933	0.116653	209331	0.174506	0	0	0	0	0	0	0	0	0	0	0	29903	0	115978915	114890294	0.990614	1088621	0.00938637	12739	0.000109839	0.358741	29386	0.000253374	0.946097	1028617	0.008869	0	0	0.0186186	130	0
MS83	sample 3	0	0	0	0	0	0	895579	1	895579	0	0	776749	0.867315	118830	0.132685	225588	0.251891	0	0	0	0	0	0	0	0	0	0	0	29903	0	82709183	81916053	0.990411	793130	0.00958938	7641	9.23839e-05	0.453606	22301	0.000269631	0.947671	830103	0.0100364	0	0	0.0199878	130	0
MS83	sample 4	0	0	0	0	0	0	235876	1	235876	0	0	208183	0.882595	27693	0.117405	24349	0.103228	0	0	0	0	0	0	0	0	0	0	0	29903	0	21780899	21576175	0.990601	204724	0.00939924	5018	0.000230385	0.286369	5149	0.0002364	0.941348	198796	0.00912708	0	0	0.0189931	130	0
MS83	sample 51	0	0	0	0	0	0	705088	1	705088	0	0	627469	0.889916	77619	0.110084	143187	0.203077	0	0	0	0	0	0	0	0	0	0	0	29903	0	66266352	65736041	0.991997	530311	0.00800272	7831	0.000118175	0.412846	16465	0.000248467	0.941209	593163	0.00895119	0	0	0.0173206	130	0
MS83	sample 30	0	0	0	0	0	0	64608	1	64608	0	0	59117	0.915011	5491	0.0849895	7380	0.114227	0	0	0	0	0	0	0	0	0	0	0	29903	0	5766958	5722098	0.992221	44860	0.0077788	829	0.00014375	0.35585	1726	0.000299291	0.966976	60927	0.0105648	0	0	0.0187867	130	0
MS83	sample 31	0	0	0	0	0	0	1257623	1	1257623	0	0	1137689	0.904634	119934	0.0953656	210890	0.167689	0	0	0	0	0	0	0	0	0	0	0	29903	0	122446225	121472590	0.992048	973635	0.00795153	13075	0.000106782	0.425621	29257	0.000238938	0.936049	1034929	0.00845211	0	0	0.0167494	130	0
MS83	sample 37	0	0	0	0	0	0	22683	1	22683	0	0	20642	0.910021	2041	0.0899793	2745	0.121016	0	0	0	0	0	0	0	0	0	0	0	29903	0	1796467	1782244	0.992083	14223	0.00791721	211	0.000117453	0.345972	508	0.000282777	0.937008	24737	0.0137698	0	0	0.0220872	130	0
MS83	sample 38	0	0	0	0	0	0	418025	1	418025	0	0	371984	0.889861	46041	0.110139	96490	0.230824	0	0	0	0	0	0	0	0	0	0	0	29903	0	37977086	37672531	0.991981	304555	0.00801944	4921	0.000129578	0.323308	10127	0.000266661	0.936901	389600	0.0102588	0	0	0.0186745	130	0
MS83	sample 22	0	0	0	0	0	0	56312	1	56312	0	0	50200	0.891462	6112	0.108538	6052	0.107473	0	0	0	0	0	0	0	0	0	0	0	29903	0	4905836	4864296	0.991533	41540	0.00846747	525	0.000107015	0.44	1290	0.000262952	0.934109	53556	0.0109168	0	0	0.0197542	130	0
MS83	sample 23	0	0	0	0	0	0	54585	1	54585	0	0	43795	0.802327	10790	0.197673	5179	0.0948795	0	0	0	0	0	0	0	0	0	0	0	29903	0	5032211	4960991	0.985847	71220	0.0141528	549	0.000109097	0.393443	1321	0.000262509	0.943225	47811	0.00950099	0	0	0.0240254	130	0
MS83	Negative control 3	0	0	0	0	0	0	41701	1	41701	0	0	36943	0.885902	4758	0.114098	4803	0.115177	0	0	0	0	0	0	0	0	0	0	0	29903	0	3756465	3719804	0.990241	36661	0.00975944	462	0.000122988	0.296537	1152	0.000306671	0.894965	38709	0.0103046	0	0	0.0204937	130	0
MS83	sample 12	0	0	0	0	0	0	1506196	1	1506196	0	0	1353520	0.898635	152676	0.101365	231934	0.153987	0	0	0	0	0	0	0	0	0	0	0	29903	0	147136136	146029393	0.992478	1106743	0.0075219	14082	9.57073e-05	0.418975	38858	0.000264096	0.942045	1203146	0.00817709	0	0	0.0160588	130	0
[truncated: 8 more columns]

## Sheet: COVseq samples 31-55 (Rep3)
Supplementary Table 2. Summary of sequencing results
Library	Sample	#QCFail	QCFailFraction	#DuplicateMarked	DuplicateFraction	#Unmapped	UnmappedFraction	#Mapped	MappedFraction	#MappedRead1	#MappedRead2	RatioMapped2vsMapped1	#MappedForward	MappedForwardFraction	#MappedReverse	MappedReverseFraction	#SecondaryAlignments	SecondaryAlignmentFraction	#SupplementaryAlignments	SupplementaryAlignmentFraction	#SplicedAlignments	SplicedAlignmentFraction	#Pairs	#MappedPairs	MappedPairsFraction	#MappedSameChr	MappedSameChrFraction	#MappedProperPair	MappedProperFraction	#ReferenceBp	#ReferenceNs	#AlignedBases	#MatchedBases	MatchRate	#MismatchedBases	MismatchRate	#DeletionsCigarD	DeletionRate	HomopolymerContextDel	#InsertionsCigarI	InsertionRate	HomopolymerContextIns	#SoftClippedCigarS	SoftClipRate	#HardClippedCigarH	HardClipRate	ErrorRate	MedianReadLength	DefaultLibraryLayout
MS84	sample 48	0	0	0	0	0	0	37548	1	37548	0	0	35192	0.937254	2356	0.0627464	2713	0.0722542	0	0	0	0	0	0	0	0	0	0	0	29903	0	3174716	3141786	0.989627	32930	0.0103726	324	0.000102056	0.305556	899	0.000283175	0.959956	37124	0.0116936	0	0	0.0224515	130	0
MS84	sample 25	0	0	0	0	0	0	446313	1	446313	0	0	405132	0.907731	41181	0.0922693	65917	0.147692	0	0	0	0	0	0	0	0	0	0	0	29903	0	43176937	42843281	0.992272	333656	0.00772764	3575	8.27988e-05	0.410629	10040	0.000232532	0.939841	348249	0.00806563	0	0	0.0161086	130	0
MS84	sample 26	0	0	0	0	0	0	105238	1	105238	0	0	96996	0.921682	8242	0.0783177	17075	0.162251	0	0	0	0	0	0	0	0	0	0	0	29903	0	8433179	8367843	0.992253	65336	0.00774749	2456	0.000291231	0.334283	1775	0.000210478	0.925634	109923	0.0130346	0	0	0.0212838	130	0
MS84	Negative control 2	0	0	0	0	0	0	28014	1	28014	0	0	25863	0.923217	2151	0.076783	3052	0.108946	0	0	0	0	0	0	0	0	0	0	0	29903	0	2475594	2454829	0.991612	20765	0.00838789	317	0.00012805	0.309148	723	0.000292051	0.901798	26893	0.0108633	0	0	0.0196712	130	0
MS84	sample 10	0	0	0	0	0	0	797668	1	797668	0	0	713741	0.894785	83927	0.105215	146298	0.183407	0	0	0	0	0	0	0	0	0	0	0	29903	0	75553170	74909864	0.991485	643306	0.00851461	7450	9.86061e-05	0.435436	19874	0.000263047	0.935192	728608	0.00964365	0	0	0.0185199	130	0
MS84	Positive control 2	0	0	0	0	0	0	606758	1	606758	0	0	551593	0.909082	55165	0.0909176	86902	0.143223	0	0	0	0	0	0	0	0	0	0	0	29903	0	57653771	57257630	0.993129	396141	0.00687103	13360	0.000231728	0.33024	16636	0.00028855	0.926605	515303	0.00893789	0	0	0.0163292	130	0
MS84	sample 11	0	0	0	0	0	0	82189	1	82189	0	0	76689	0.933081	5500	0.0669189	6659	0.0810206	0	0	0	0	0	0	0	0	0	0	0	29903	0	7339145	7285231	0.992654	53914	0.00734609	952	0.000129715	0.644958	1945	0.000265017	0.957841	71819	0.00978574	0	0	0.0175266	130	0
MS84	sample 29	0	0	0	0	0	0	69374	1	69374	0	0	63240	0.911581	6134	0.0884193	4742	0.0683541	0	0	0	0	0	0	0	0	0	0	0	29903	0	6173596	6120814	0.99145	52782	0.00854964	540	8.74693e-05	0.305556	1460	0.000236491	0.939041	64404	0.0104322	0	0	0.0193058	131	0
MS84	Negative control 1	0	0	0	0	0	0	21552	1	21552	0	0	19750	0.916388	1802	0.0836117	2046	0.0949332	0	0	0	0	0	0	0	0	0	0	0	29903	0	1916092	1900807	0.992023	15285	0.00797717	252	0.000131518	0.261905	553	0.000288608	0.882459	20678	0.0107918	0	0	0.0191891	130	0
MS84	sample 8	0	0	0	0	0	0	620782	1	620782	0	0	563493	0.907715	57289	0.0922852	133978	0.215821	0	0	0	0	0	0	0	0	0	0	0	29903	0	54873173	54396821	0.991319	476352	0.00868096	5139	9.36523e-05	0.418953	13914	0.000253567	0.933305	585945	0.0106782	0	0	0.0197064	130	0
MS84	Positive control 1	0	0	0	0	0	0	544334	1	544334	0	0	498380	0.915578	45954	0.0844224	79640	0.146307	0	0	0	0	0	0	0	0	0	0	0	29903	0	52203507	51828713	0.992821	374794	0.00717948	11927	0.000228471	0.344093	15397	0.000294942	0.928493	458889	0.00879039	0	0	0.0164933	130	0
MS84	sample 9	0	0	0	0	0	0	993782	1	993782	0	0	900579	0.906214	93203	0.0937862	155747	0.156721	0	0	0	0	0	0	0	0	0	0	0	29903	0	96944616	96143802	0.991739	800814	0.00826053	9289	9.58176e-05	0.437507	24341	0.000251082	0.936568	827129	0.00853197	0	0	0.0171394	130	0
MS84	sample 39	0	0	0	0	0	0	595065	1	595065	0	0	538329	0.904656	56736	0.0953442	91357	0.153524	0	0	0	0	0	0	0	0	0	0	0	29903	0	58448131	57981943	0.992024	466188	0.0079761	5128	8.77359e-05	0.429992	14496	0.000248015	0.942329	469425	0.00803148	0	0	0.0163433	130	0
MS84	sample 40	0	0	0	0	0	0	565971	1	565971	0	0	503470	0.889569	62501	0.110431	107657	0.190216	0	0	0	0	0	0	0	0	0	0	0	29903	0	54157549	53661257	0.990836	496292	0.00916386	5326	9.83427e-05	0.435599	13970	0.000257951	0.938869	495596	0.009151	0	0	0.0186712	130	0
MS84	sample 18	0	0	0	0	0	0	47663	1	47663	0	0	44191	0.927155	3472	0.0728448	3976	0.083419	0	0	0	0	0	0	0	0	0	0	0	29903	0	3828583	3799713	0.992459	28870	0.00754065	411	0.00010735	0.586375	1731	0.000452125	0.969382	50083	0.0130813	0	0	0.0211815	130	0
MS84	sample 19	0	0	0	0	0	0	1241913	1	1241913	0	0	1117964	0.900195	123949	0.0998049	241477	0.19444	0	0	0	0	0	0	0	0	0	0	0	29903	0	114774567	113627297	0.990004	1147270	0.00999586	10122	8.81903e-05	0.440822	29024	0.000252878	0.935881	1175036	0.0102378	0	0	0.0205747	130	0
MS84	sample 24	0	0	0	0	0	0	46450	1	46450	0	0	42717	0.919634	3733	0.080366	3869	0.0832939	0	0	0	0	0	0	0	0	0	0	0	29903	0	3981551	3947863	0.991539	33688	0.00846102	316	7.93661e-05	0.376582	1557	0.000391054	0.967887	42953	0.010788	0	0	0.0197195	130	0
MS84	sample 34	0	0	0	0	0	0	498712	1	498712	0	0	462244	0.926876	36468	0.0731244	54640	0.109562	0	0	0	0	0	0	0	0	0	0	0	29903	0	49723298	49416706	0.993834	306592	0.00616596	4434	8.91735e-05	0.491881	11041	0.000222049	0.941038	368511	0.00741123	0	0	0.0138884	130	0
MS84	sample 35	0	0	0	0	0	0	45616	1	45616	0	0	42850	0.939363	2766	0.0606366	3346	0.0733515	0	0	0	0	0	0	0	0	0	0	0	29903	0	4083927	4055165	0.992957	28762	0.00704273	424	0.000103822	0.372642	989	0.000242169	0.926188	42331	0.0103653	0	0	0.017754	130	0
MS84	sample 49	0	0	0	0	0	0	844247	1	844247	0	0	772939	0.915537	71308	0.0844634	99509	0.117867	0	0	0	0	0	0	0	0	0	0	0	29903	0	84055645	83416583	0.992397	639062	0.00760284	8917	0.000106084	0.375238	19752	0.000234987	0.936614	656138	0.007806	0	0	0.0157499	130	0
MS84	sample 1	0	0	0	0	0	0	137914	1	137914	0	0	127406	0.923808	10508	0.0761924	13792	0.100004	0	0	0	0	0	0	0	0	0	0	0	29903	0	12402012	12298708	0.99167	103304	0.00832962	1494	0.000120464	0.525435	2784	0.00022448	0.930675	125609	0.0101281	0	0	0.0188027	131	0
MS84	sample 50	0	0	0	0	0	0	946692	1	946692	0	0	865469	0.914203	81223	0.0857966	130438	0.137783	0	0	0	0	0	0	0	0	0	0	0	29903	0	91756025	91089586	0.992737	666439	0.00726316	7906	8.61633e-05	0.423223	21054	0.000229456	0.939821	784130	0.00854581	0	0	0.0161246	130	0
MS84	sample 2	0	0	0	0	0	0	767686	1	767686	0	0	687352	0.895356	80334	0.104644	130459	0.169938	0	0	0	0	0	0	0	0	0	0	0	29903	0	73410726	72748756	0.990983	661970	0.00901735	7707	0.000104985	0.404957	18638	0.000253887	0.938942	678906	0.00924805	0	0	0.0186243	130	0
MS84	sample 42	0	0	0	0	0	0	65295	1	65295	0	0	59420	0.910024	5875	0.0899763	4894	0.0749521	0	0	0	0	0	0	0	0	0	0	0	29903	0	5790317	5734352	0.990335	55965	0.00966527	532	9.18775e-05	0.413534	1990	0.000343677	0.955276	57868	0.00999393	0	0	0.0200948	130	0
MS84	sample 43	0	0	0	0	0	0	446111	1	446111	0	0	405745	0.909516	40366	0.0904842	54573	0.122331	0	0	0	0	0	0	0	0	0	0	0	29903	0	43650729	43281940	0.991551	368789	0.00844863	3684	8.43972e-05	0.439197	11469	0.000262745	0.930596	341929	0.00783329	0	0	0.0166291	130	0
MS84	sample 15	0	0	0	0	0	0	477087	1	477087	0	0	437320	0.916646	39767	0.0833538	60180	0.126141	0	0	0	0	0	0	0	0	0	0	0	29903	0	45726977	45286203	0.990361	440774	0.00963926	3789	8.28614e-05	0.422803	10264	0.000224463	0.936769	385540	0.00843135	0	0	0.0183779	130	0
MS84	sample 16	0	0	0	0	0	0	940028	1	940028	0	0	837770	0.891218	102258	0.108782	179896	0.191373	0	0	0	0	0	0	0	0	0	0	0	29903	0	87061363	86223222	0.990373	838141	0.00962701	9317	0.000107016	0.364495	21756	0.000249893	0.934731	890494	0.0102283	0	0	0.0202123	130	0
MS84	sample 52	0	0	0	0	0	0	756382	1	756382	0	0	686211	0.907228	70171	0.0927719	163414	0.216047	0	0	0	0	0	0	0	0	0	0	0	29903	0	67946121	67447609	0.992663	498512	0.00733687	7010	0.00010317	0.394864	18633	0.000274232	0.9305	699798	0.0102993	0	0	0.0180136	130	0
MS84	sample 53	0	0	0	0	0	0	1255328	1	1255328	0	0	1137089	0.90581	118239	0.0941897	170903	0.136142	0	0	0	0	0	0	0	0	0	0	0	29903	0	122666858	121724322	0.992316	942536	0.00768371	11925	9.72145e-05	0.423816	31009	0.00025279	0.92686	1007432	0.00821275	0	0	0.0162465	130	0
MS84	sample 5	0	0	0	0	0	0	264472	1	264472	0	0	242587	0.91725	21885	0.0827498	28547	0.10794	0	0	0	0	0	0	0	0	0	0	0	29903	0	25264154	25086889	0.992984	177265	0.00701646	1819	7.19992e-05	0.427158	5284	0.00020915	0.938683	209689	0.00829986	0	0	0.0155975	130	0
MS84	sample 32	0	0	0	0	0	0	64159	1	64159	0	0	61404	0.95706	2755	0.0429402	4208	0.0655871	0	0	0	0	0	0	0	0	0	0	0	29903	0	5563053	5536068	0.995149	26985	0.00485075	574	0.000103181	0.33101	1773	0.00031871	0.956571	62302	0.0111992	0	0	0.0164719	130	0
MS84	sample 33	0	0	0	0	0	0	79752	1	79752	0	0	74676	0.936353	5076	0.0636473	6735	0.0844493	0	0	0	0	0	0	0	0	0	0	0	29903	0	6886663	6828139	0.991502	58524	0.00849817	1600	0.000232333	0.12875	1605	0.000233059	0.946417	79122	0.0114892	0	0	0.0204527	131	0
MS84	sample 54	0	0	0	0	0	0	35669	1	35669	0	0	32162	0.901679	3507	0.0983207	5585	0.156579	0	0	0	0	0	0	0	0	0	0	0	29903	0	3187134	3158294	0.990951	28840	0.00904888	267	8.37743e-05	0.486891	799	0.000250695	0.938673	33785	0.0106004	0	0	0.0199838	130	0
MS84	sample 6	0	0	0	0	0	0	462363	1	462363	0	0	416128	0.900003	46235	0.0999972	94198	0.203732	0	0	0	0	0	0	0	0	0	0	0	29903	0	40092898	39791825	0.992491	301073	0.00750938	4547	0.000113412	0.394766	9988	0.000249121	0.938126	418355	0.0104346	0	0	0.0183066	130	0
MS84	sample 55	0	0	0	0	0	0	625998	1	625998	0	0	562874	0.899163	63124	0.100837	108775	0.173763	0	0	0	0	0	0	0	0	0	0	0	29903	0	59747448	59245145	0.991593	502303	0.0084071	7428	0.000124323	0.342084	14976	0.000250655	0.946982	521528	0.00872887	0	0	0.017511	130	0
MS84	sample 7	0	0	0	0	0	0	1045180	1	1045180	0	0	941814	0.901102	103366	0.0988978	195849	0.187383	0	0	0	0	0	0	0	0	0	0	0	29903	0	97749573	96861766	0.990918	887807	0.00908246	9182	9.39339e-05	0.452625	25300	0.000258825	0.936443	971723	0.00994094	0	0	0.0193762	130	0
MS84	sample 27	0	0	0	0	0	0	741625	1	741625	0	0	672210	0.906401	69415	0.0935985	110353	0.148799	0	0	0	0	0	0	0	0	0	0	0	29903	0	72402125	71818625	0.991941	583500	0.00805916	6799	9.39061e-05	0.477864	16729	0.000231057	0.939925	597831	0.00825709	0	0	0.0166412	130	0
MS84	sample 28	0	0	0	0	0	0	131160	1	131160	0	0	122354	0.932861	8806	0.0671394	9429	0.0718893	0	0	0	0	0	0	0	0	0	0	0	29903	0	11874653	11799667	0.993685	74986	0.0063148	991	8.34551e-05	0.347124	2708	0.000228049	0.948301	118257	0.00995878	0	0	0.0165851	130	0
MS84	sample 44	0	0	0	0	0	0	41652	1	41652	0	0	38853	0.9328	2799	0.0671997	3376	0.0810525	0	0	0	0	0	0	0	0	0	0	0	29903	0	3415396	3390842	0.992811	24554	0.00718921	643	0.000188265	0.175739	1281	0.000375066	0.952381	42052	0.0123125	0	0	0.020065	130	0
MS84	sample 45	0	0	0	0	0	0	877903	1	877903	0	0	804955	0.916907	72948	0.0830935	121979	0.138944	0	0	0	0	0	0	0	0	0	0	0	29903	0	85320045	84622392	0.991823	697653	0.00817689	7585	8.89006e-05	0.462228	20468	0.000239897	0.937512	702057	0.00822851	0	0	0.0167342	130	0
MS84	sample 17	0	0	0	0	0	0	609642	1	609642	0	0	544874	0.893761	64768	0.106239	119031	0.195247	0	0	0	0	0	0	0	0	0	0	0	29903	0	57614659	57104359	0.991143	510300	0.00885712	5161	8.95779e-05	0.430924	14848	0.000257712	0.937702	547135	0.00949645	0	0	0.0187009	130	0
MS84	sample 46	0	0	0	0	0	0	95537	1	95537	0	0	88306	0.924312	7231	0.075688	7773	0.0813611	0	0	0	0	0	0	0	0	0	0	0	29903	0	8372171	8309033	0.992459	63138	0.00754141	901	0.000107618	0.294118	1723	0.000205801	0.927452	88160	0.0105301	0	0	0.018385	130	0
MS84	sample 47	0	0	0	0	0	0	635049	1	635049	0	0	569895	0.897403	65154	0.102597	129774	0.204353	0	0	0	0	0	0	0	0	0	0	0	29903	0	57925642	57387843	0.990716	537799	0.0092843	5851	0.000101009	0.413263	15545	0.000268361	0.937279	618772	0.0106822	0	0	0.0203358	130	0
MS84	sample 13	0	0	0	0	0	0	723006	1	723006	0	0	661616	0.915091	61390	0.0849094	138429	0.191463	0	0	0	0	0	0	0	0	0	0	0	29903	0	64829461	64099042	0.988733	730419	0.0112668	6714	0.000103564	0.406166	16745	0.000258293	0.938131	694041	0.0107056	0	0	0.0223343	130	0
MS84	sample 14	0	0	0	0	0	0	798193	1	798193	0	0	729398	0.913812	68795	0.0861884	121525	0.15225	0	0	0	0	0	0	0	0	0	0	0	29903	0	77170492	76504216	0.991366	666276	0.00863382	8999	0.000116612	0.472386	17264	0.000223712	0.94642	626936	0.00812404	0	0	0.0170982	130	0
MS84	sample 36	0	0	0	0	0	0	765971	1	765971	0	0	687005	0.896907	78966	0.103093	131810	0.172082	0	0	0	0	0	0	0	0	0	0	0	29903	0	72478452	71871313	0.991623	607139	0.00837682	7688	0.000106073	0.422867	19163	0.000264396	0.942128	691832	0.00954535	0	0	0.0182926	130	0
MS84	sample 20	0	0	0	0	0	0	890149	1	890149	0	0	820705	0.921986	69444	0.0780139	118592	0.133227	0	0	0	0	0	0	0	0	0	0	0	29903	0	86726488	86138090	0.993215	588398	0.00678452	9507	0.00010962	0.404754	19664	0.000226736	0.938059	718875	0.00828899	0	0	0.0154099	130	0
MS84	sample 21	0	0	0	0	0	0	80810	1	80810	0	0	73826	0.913575	6984	0.0864249	5049	0.0624799	0	0	0	0	0	0	0	0	0	0	0	29903	0	7348245	7275764	0.990136	72481	0.00986372	1224	0.00016657	0.518791	1540	0.000209574	0.94026	66912	0.00910585	0	0	0.0193457	130	0
MS84	sample 41	0	0	0	0	0	0	791609	1	791609	0	0	704899	0.890464	86710	0.109536	130972	0.16545	0	0	0	0	0	0	0	0	0	0	0	29903	0	76349546	75626736	0.990533	722810	0.00946712	8101	0.000106104	0.369707	19701	0.000258037	0.94249	680366	0.0089112	0	0	0.0187425	130	0
MS84	sample 3	0	0	0	0	0	0	533611	1	533611	0	0	480017	0.899564	53594	0.100436	123330	0.231123	0	0	0	0	0	0	0	0	0	0	0	29903	0	47571410	47202981	0.992255	368429	0.00774476	4960	0.000104264	0.39879	13129	0.000275985	0.931449	519798	0.0109267	0	0	0.0190517	130	0
MS84	sample 4	0	0	0	0	0	0	122412	1	122412	0	0	107257	0.876197	15155	0.123803	12322	0.10066	0	0	0	0	0	0	0	0	0	0	0	29903	0	11208952	11095264	0.989857	113688	0.0101426	2823	0.000251852	0.308891	2495	0.00022259	0.947896	104821	0.00935154	0	0	0.0199686	130	0
MS84	sample 51	0	0	0	0	0	0	771407	1	771407	0	0	697486	0.904174	73921	0.0958262	153000	0.198339	0	0	0	0	0	0	0	0	0	0	0	29903	0	71478068	70956956	0.992709	521112	0.00729052	8464	0.000118414	0.406782	18032	0.000252273	0.933895	674677	0.00943894	0	0	0.0171001	130	0
MS84	sample 30	0	0	0	0	0	0	51240	1	51240	0	0	47371	0.924493	3869	0.0755074	5040	0.0983607	0	0	0	0	0	0	0	0	0	0	0	29903	0	4469321	4436832	0.992731	32489	0.00726934	757	0.000169377	0.409511	1408	0.000315037	0.949574	48864	0.0109332	0	0	0.018687	130	0
MS84	sample 31	0	0	0	0	0	0	965159	1	965159	0	0	877505	0.909182	87654	0.0908182	163467	0.169368	0	0	0	0	0	0	0	0	0	0	0	29903	0	91493823	90751138	0.991883	742685	0.00811732	10223	0.000111734	0.420914	22178	0.000242399	0.933042	859991	0.00939944	0	0	0.0178709	130	0
MS84	sample 37	0	0	0	0	0	0	9594	1	9594	0	0	8785	0.915676	809	0.0843235	1506	0.156973	0	0	0	0	0	0	0	0	0	0	0	29903	0	838101	831939	0.992648	6162	0.00735234	82	9.78402e-05	0.365854	218	0.000260112	0.912844	9640	0.0115022	0	0	0.0192125	130	0
MS84	sample 38	0	0	0	0	0	0	678617	1	678617	0	0	607757	0.895582	70860	0.104418	123685	0.18226	0	0	0	0	0	0	0	0	0	0	0	29903	0	65162413	64607641	0.991486	554772	0.00851368	7244	0.000111168	0.394119	16359	0.00025105	0.939177	589089	0.00904032	0	0	0.0179162	130	0
MS84	sample 22	0	0	0	0	0	0	43055	1	43055	0	0	38997	0.905748	4058	0.0942515	3383	0.0785739	0	0	0	0	0	0	0	0	0	0	0	29903	0	3676775	3645563	0.991511	31212	0.00848896	342	9.30163e-05	0.412281	1006	0.000273609	0.941352	42205	0.0114788	0	0	0.0203344	130	0
MS84	sample 23	0	0	0	0	0	0	39652	1	39652	0	0	31589	0.796656	8063	0.203344	2986	0.0753052	0	0	0	0	0	0	0	0	0	0	0	29903	0	3581890	3520572	0.982881	61318	0.0171189	410	0.000114465	0.414634	1026	0.000286441	0.949318	36450	0.0101762	0	0	0.027696	130	0
MS84	Negative control 3	0	0	0	0	0	0	26346	1	26346	0	0	23514	0.892507	2832	0.107493	2176	0.0825932	0	0	0	0	0	0	0	0	0	0	0	29903	0	2326849	2302405	0.989495	24444	0.0105052	310	0.000133227	0.232258	715	0.000307283	0.886713	25217	0.0108374	0	0	0.0217831	130	0
MS84	sample 12	0	0	0	0	0	0	1102566	1	1102566	0	0	990380	0.89825	112186	0.10175	174990	0.158712	0	0	0	0	0	0	0	0	0	0	0	29903	0	105852809	104988372	0.991834	864437	0.00816641	9642	9.10887e-05	0.445758	25485	0.000240759	0.940671	952191	0.00899542	0	0	0.0174937	130	0
[truncated: 8 more columns]

## Sheet: COVseq WF#3
Supplementary Table 2. Summary of sequencing results
Library	Sample	#QCFail	QCFailFraction	#DuplicateMarked	DuplicateFraction	#Unmapped	UnmappedFraction	#Mapped	MappedFraction	#MappedRead1	#MappedRead2	RatioMapped2vsMapped1	#MappedForward	MappedForwardFraction	#MappedReverse	MappedReverseFraction	#SecondaryAlignments	SecondaryAlignmentFraction	#SupplementaryAlignments	SupplementaryAlignmentFraction	#SplicedAlignments	SplicedAlignmentFraction	#Pairs	#MappedPairs	MappedPairsFraction	#MappedSameChr	MappedSameChrFraction	#MappedProperPair	MappedProperFraction	#ReferenceBp	#ReferenceNs	#AlignedBases	#MatchedBases	MatchRate	#MismatchedBases	MismatchRate	#DeletionsCigarD	DeletionRate	HomopolymerContextDel	#InsertionsCigarI	InsertionRate	HomopolymerContextIns	#SoftClippedCigarS	SoftClipRate	#HardClippedCigarH	HardClipRate	ErrorRate	MedianReadLength	DefaultLibraryLayout
TN10	Negative control 2	0	0	0	0	0	0	157222	1	157222	0	0	139544	0.88756	17678	0.11244	19705	0.125332	0	0	0	0	0	0	0	0	0	0	0	29903	0	13584842	13449717	0.990053	135125	0.00994675	2851	0.000209866	0.317432	3841	0.000282742	0.914866	116262	0.00855822	0	0	0.0189976	129	0
TN10	50.000 copies	0	0	0	0	0	0	2322262	1	2322262	0	0	1916929	0.825458	405333	0.174542	685940	0.295376	0	0	0	0	0	0	0	0	0	0	0	29903	0	201307488	199514559	0.991094	1792929	0.00890642	46888	0.000232917	0.344736	72003	0.000357677	0.898865	2057275	0.0102196	0	0	0.0197166	130	0
TN10	10.000 copies	0	0	0	0	0	0	3251413	1	3251413	0	0	2734655	0.841067	516758	0.158933	988587	0.304048	0	0	0	0	0	0	0	0	0	0	0	29903	0	274120418	271868896	0.991786	2251522	0.00821362	63879	0.000233033	0.342773	94226	0.000343739	0.886475	3079240	0.0112332	0	0	0.0200236	130	0
TN10	500 copies	0	0	0	0	0	0	1899219	1	1899219	0	0	1599223	0.842042	299996	0.157958	353146	0.185943	0	0	0	0	0	0	0	0	0	0	0	29903	0	163858453	162233795	0.990085	1624658	0.00991501	38822	0.000236924	0.336613	60275	0.000367848	0.913231	1510281	0.00921699	0	0	0.0197368	129	0
TN10	100 copies	0	0	0	0	0	0	558227	1	558227	0	0	512888	0.91878	45339	0.0812196	45221	0.0810083	0	0	0	0	0	0	0	0	0	0	0	29903	0	49230997	48925640	0.993797	305357	0.00620254	14984	0.000304361	0.152963	13033	0.000264732	0.930024	331127	0.00672599	0	0	0.0134976	129	0
TN10	Negative control 1	0	0	0	0	0	0	323096	1	323096	0	0	295184	0.913611	27912	0.0863892	32565	0.10079	0	0	0	0	0	0	0	0	0	0	0	29903	0	28142802	27939611	0.99278	203191	0.00722	5509	0.000195752	0.304048	8620	0.000306295	0.928886	201407	0.00715661	0	0	0.0148787	128	0
TN10	5.000 copies	0	0	0	0	0	0	2148995	1	2148995	0	0	1801701	0.838392	347294	0.161608	587039	0.273169	0	0	0	0	0	0	0	0	0	0	0	29903	0	185001615	183518739	0.991985	1482876	0.00801548	42728	0.00023096	0.334371	66359	0.000358694	0.896593	1912487	0.0103377	0	0	0.0189428	130	0
TN10	1.000 copies	0	0	0	0	0	0	452523	1	452523	0	0	410756	0.907702	41767	0.0922981	53766	0.118814	0	0	0	0	0	0	0	0	0	0	0	29903	0	40790562	40523982	0.993465	266580	0.00653534	10226	0.000250695	0.291707	13075	0.00032054	0.916941	300756	0.00737318	0	0	0.0144797	129	0
[truncated: 8 more columns]
